# Supplementary material for: Stereo- and regio-selective synthesis of silicon-containing diborylalkenesviaplatinum-catalyzed mono-lateral diboration of dialkynylsilanes
Source: Royal Society of Chemistry journal article supplement (doi:10.1039/d0cc00844c), 2020-01-01
Supplement: d0cc00844c1.pdf [file d0cc00844c1.pdf]

## Supporting Information

### **Stereo- and Regio-Selective Synthesis of Silicon-Containing Diborylalkenes via Platinum-Catalyzed Mono-Lateral Diboration of Dialkynylsilanes**

Peng-Wei Long,<sup>a†</sup> Jia-Le Xie,<sup>a†</sup> Jing-Jing Yang,<sup>a</sup> Si-Qi Lu,<sup>a</sup> Zheng Xu,<sup>\*a</sup> Fei Ye,<sup>a</sup> and Li-Wen Xu<sup>\*ab</sup>

<sup>a</sup> Key Laboratory of Organosilicon Chemistry and Material Technology of Ministry of Education, and Key Laboratory of Organosilicon Material Technology of Zhejiang Province, Hangzhou Normal University, P. R. China

E-mail: [zhengxu@hznu.edu.cn](mailto:zhengxu@hznu.edu.cn); [liwenxu@hznu.edu.cn](mailto:liwenxu@hznu.edu.cn) (XLW)

<sup>b</sup> State Key Laboratory for Oxo Synthesis and Selective Oxidation, Suzhou Research Institute and Lanzhou Institute of Chemical Physics, Chinese Academy of Sciences, P. R. China

† P.W. Long and J. L. Xie contributed equally to this work.

## Table of Contents

|                                                |     |
|------------------------------------------------|-----|
| Experimental Information .....                 | S1  |
| I . General Information .....                  | S1  |
| II . Preparation of Pt(dba) <sub>3</sub> ..... | S1  |
| III. Synthesis of <b>L7</b> .....              | S2  |
| IV. Preparation of prochiral silane.....       | S5  |
| V . General procedure .....                    | S13 |
| References .....                               | S24 |
| Table S1.....                                  | S25 |
| Scheme S1 .....                                | S26 |
| Table S2.....                                  | S27 |
| Table S3.....                                  | S28 |
| Table S4.....                                  | S29 |
| Table S5.....                                  | S30 |
| Scheme S2 .....                                | S31 |
| Table S6.....                                  | S32 |
| Scheme S3 .....                                | S33 |
| Table S7.....                                  | S34 |
| Table S8.....                                  | S35 |
| Scheme S4 .....                                | S36 |
| The COSY and NOESY spectra of <b>3f</b> .....  | S37 |
| NMR Spectra.....                               | S39 |
| HPLC Spectra.....                              | S79 |
| Computational studies.....                     | S80 |

## Experimental Information

### I . General Information

Unless specifically stated, all reagents were commercially obtained and where appropriate, purified prior to use. For example, all the aldehydes recrystallized or distilled prior to use. Dichloromethane, toluene, were freshly distilled from  $\text{CaH}_2$ , THF was freshly distilled from sodium metal prior to use. Ether ( $\text{Et}_2\text{O}$ ), tetrahydrofuran (THF) and 1, 4-dioxane were dried and distilled from metal sodium and benzophenone. Alcohol solvents were dried and distilled from metal magnesium. Other commercially available reagents and solvents were used directly without purification. Reactions were monitored by thin layer chromatography (TLC) using silica gel plates. Flash column chromatography was performed over silica (200-300 mesh).  $^1\text{H}$ ,  $^{13}\text{C}$ ,  $^{19}\text{F}$  and  $^{29}\text{Si}$  NMR spectra were recorded on a Bruker 400 MHz or 500 MHz spectrometer in  $\text{CDCl}_3$ . Multiplicities were given as: s (singlet); d (doublet); dd (doublets of doublet); t (triplet); q (quartet); or m (multiplets). High resolution mass spectra (HRMS) of the products were obtained on a Bruker Daltonics micro TOF-spectrometer.

### II . Preparation of $\text{Pt}(\text{dba})_3$

$\text{Pt}(\text{dba})_3$  was prepared using the literature<sup>[1]</sup> procedure<sup>1</sup> with slight modification. To a two-neck 250-mL round-bottomed flask equipped with a magnetic stir bar and reflux condenser was added trans-dibenzylideneacetone (2.4 g, 10.0 mmol, 7.0 eq), tetrabutylammonium chloride (1.2 g, 4.3 mmol, 3.0 eq), and sodium acetate (2.1 g, 25.7 mmol, 18.0 eq). Salts were dissolved in methanol and the solution was warmed to 70 °C and allowed to stir for 5 min. To a 50-mL pear-shaped flask was added potassium tetrachloroplatinate (593 mg, 1.4 mmol, 1.0 eq). The potassium salt was dissolved in water (4.0 mL) with mild heating. The two-neck roundbottomed flask was charged with the potassium tetrachloroplatinate solution and the reaction was

allowed to stir at 70 °C for 3 h. After 3 h, the reaction was cooled to ambient temperature, transferred to a 500 mL round-bottomed flask and concentrated by rotary evaporation to half the volume. The reaction mixture was filtered on a Büchner funnel; solids were washed with copious amounts of water and methanol until no yellow dibenzylideneacetone crystals were visible. The platinum catalyst was placed under the high vacuum for 24 h to remove residual methanol and water, and Pt(dba)<sub>3</sub> was obtained as a dark brown solid (572 mg, 45% yield).

### III. Synthesis of novel P-ligand L7

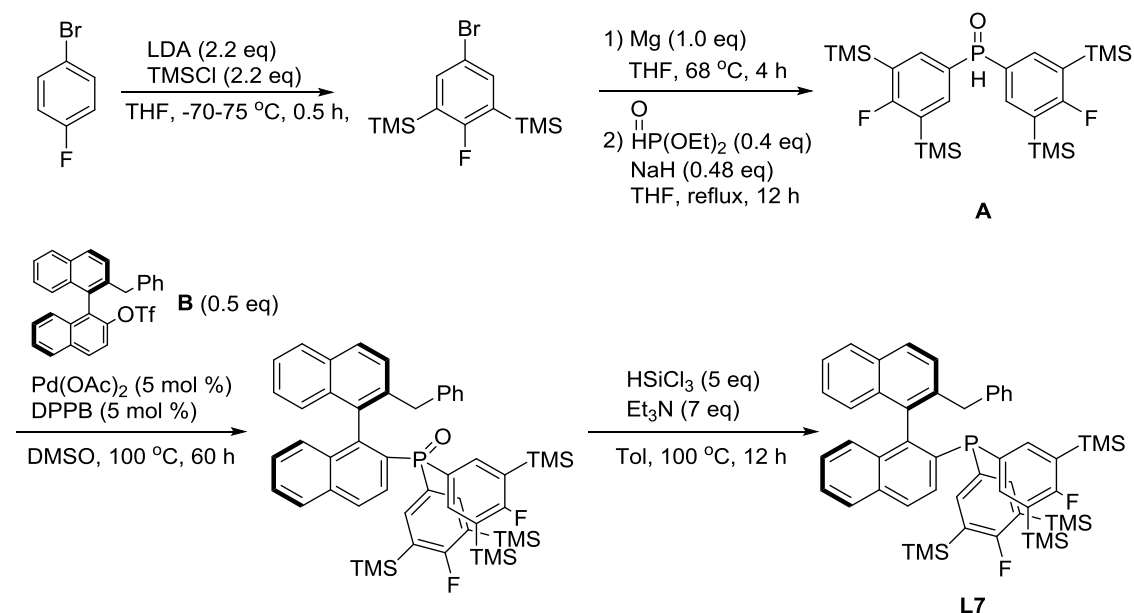

The preparation of 1-bromo-4-fluoro-3,5-bis(trimethylsilyl)benzene was according to literature procedure.<sup>[2]</sup> LDA (2 M, 55 mL, 110 mmol, 2.2 eq) was added dropwise to a solution of 1-bromo-4-fluorobenzene (7.8 g, 50 mmol, 1.0 eq) in THF (70 mL) containing TMSCl (12.0 g, 110 mmol, 2.2 eq) at -70 °C. The resultant solution was stirred for 30 min at -75 °C and hydrolyzed with dilute aqueous H<sub>2</sub>SO<sub>4</sub>. The yellow organic phase was separated, and the water phase was extracted with ether. Evaporation of the combined organic solutions left a pale-yellow oil. The oil was distilled in vacuo to give a crude product as a colorless oil. Methanol (10 mL) was added, and the solution was left to stand overnight in a -20 °C freezer. Crystals that

separated from the solution were filtered, washed with cold methanol, and dried to give a white crystalline material, mp 48-50 °C. Yield: 12.5 g (78%).

Under N<sub>2</sub> atmosphere a heat-gun dried two-neck flask with a reflux condenser was charged with magnesium (1.6 g, 64.2 mmol, 2.5 eq) and THF (1 mL pro mmol bromide). Then the 1-Bromo-4-fluoro-3,5-bis(trimethylsilyl)benzene (20.4 g, 64.2 mmol, 2.5 eq) was added dropwise and the Grignard reagent formation started by heating with a heat gun. After the reaction had started, the reaction mixture was refluxed for four hours at 68 °C. Under N<sub>2</sub> atmosphere a second heat-gun dried two-neck flask was charged with NaH (1.2 g, 30.8 mmol, 60% in mineral oil, 1.2 eq) and THF (0.5 mL pro mmol phosphite). Then this mixture was cooled in an ice bath and at 0 °C diethyl phosphite (3.3 mL, 25.7 mmol, 1.0 eq) was added dropwise over 15 minutes. Afterwards the reaction mixture was stirred for 30 minutes at 0 °C and then the freshly prepared Grignard reagent was added dropwise. After addition the mixture was stirred for 16 hours at room temperature and then quenched with saturated aqueous NH<sub>4</sub>Cl solution (5 mL pro mmol phosphite). The aqueous layer was extracted with CH<sub>2</sub>Cl<sub>2</sub> (3 × 5 mL pro mmol phosphite) and the combined organic layers were dried over Na<sub>2</sub>SO<sub>4</sub>. After concentration under vacuum the resulting crude product was purified by trituration with hexane/MTBE (3:1, 1 mL pro mmol phosphite) to afford the product (8.9 g, 16.4 mmol, 64%) as white solid. The synthesis of (*S*)-**B** was according to literature<sup>[3]</sup> and **L7** referred to previously reported literature.<sup>[3]</sup>

To a Schlenk flask charged with (*S*)-**B** (800 mg, 1.625 mmol, 1.0 eq), diarylphosphine oxide (1.7 g, 3.2 mmol, 2.0 eq), Pd(OAc)<sub>2</sub> (18.2 mg, 5 mol %) and DPPB (34.7 mg, 5 mol %) in DMSO (5 mL) was added DIPEA (420 mg, 3.2 mmol, 2.0 eq) under N<sub>2</sub>. The resulting mixture was stirred at 100 °C for 60 h. Then the mixture was cooled to room temperature, diluted with EtOAc (20 mL), washed with water (5 mL × 3), brine (10 mL), successively. The organic phase was dried over anhydrous Na<sub>2</sub>SO<sub>4</sub>, filtered, concentrated, and the crude residue was filtrated through a short silica gel column and flushed with petroleum ether/ethyl acetate (3:1). The

filtrate was concentrated under reduce pressure, and a yellow solid (814 mg, 0.95 mmol, 59 % yield) was obtained and used for the next step without further purification. To a dried Schlenk flask charged with the above product (814 mg, 0.93 mmol, 1.0 eq) in dry toluene (10 mL), Et<sub>3</sub>N (670 mg, 6.52 mmol, 7.0 eq) and HSiCl<sub>3</sub> (0.64 g, 4.65 mmol, 5.0 eq) were added successively under N<sub>2</sub> at 0 °C. The resulting mixture was stirring at 100 °C for 18 h. After cooled to 0 °C, diluted by Et<sub>2</sub>O (20 mL), quenched with saturated Na<sub>2</sub>CO<sub>3</sub> solution, the mixture was filtered by a short celite column, and washed with Et<sub>2</sub>O (10 mL × 3). The filtrate was dried over anhydrous Na<sub>2</sub>SO<sub>4</sub>, filtered, concentrated, and the residue was purified by flash chromatography on silica gel (petroleum ether/ethyl acetate = 20:1) to afford the desired product 5a as a white solid (777 mg, 97 % yield).

**(*R*)-(2'-benzyl-[1,1'-binaphthalen]-2-yl)bis(4-fluoro-3,5-bis(trimethylsilyl)phenyl)phosphane (L12)**

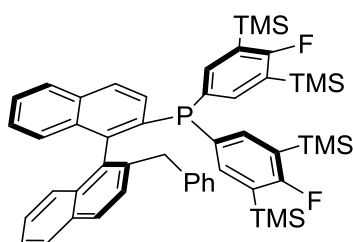

White solid.  $[\alpha]_D^{25} = +22.586$  ( $c$  0.0068, CHCl<sub>3</sub>,  $l=100$  mm). <sup>1</sup>H NMR (500 MHz, CDCl<sub>3</sub>)  $\delta$  7.98 (d,  $J$  = 8.5 Hz, 1H), 7.95 (d,  $J$  = 8.2 Hz, 1H), 7.90 (d,  $J$  = 8.5 Hz, 1H), 7.85 (d,  $J$  = 8.1 Hz, 1H), 7.51 (ddd,  $J$  = 8.1, 6.6, 1.3 Hz, 1H), 7.45 (dd,  $J$  = 8.5, 2.9 Hz, 1H), 7.38-7.31 (m, 4H), 7.25 (ddd,  $J$  = 8.1, 6.7, 1.3 Hz, 1H), 7.20 (d,  $J$  = 8.5 Hz, 1H), 7.15-7.08 (m, 5H), 6.99 (ddd,  $J$  = 8.3, 6.8, 1.3 Hz, 1H), 6.87 (dd,  $J$  = 6.5, 2.9 Hz, 2H), 6.79 (d,  $J$  = 8.4 Hz, 1H), 3.61 (d,  $J$  = 16.5 Hz, 1H), 3.58 (d,  $J$  = 16.0 Hz, 1H), 0.23 (d,  $J$  = 2.4 Hz, 36H). <sup>13</sup>C NMR (101 MHz, CDCl<sub>3</sub>)  $\delta$  173.5 (d,  $J$  = 239.0 Hz), 144.7 (d,  $J$  = 33.4 Hz), 143.3 (td,  $J$  = 21.5, 20.8, 12.0 Hz), 141.3, 139.1, 137.2 (d,  $J$  = 11.3 Hz), 136.3 (d,  $J$  = 8.1 Hz), 134.6, 134.2, 134.0 (d,  $J$  = 7.0 Hz), 132.9, 130.1, 130.5, 129.2, 129.1, 129.0, 128.9, 128.8, 128.4, 127.8, 127.7, 127.5, 126.7 (d,  $J$  = 13.8 Hz), 126.6 (d,  $J$  = 5.3 Hz), 126.1 (d,  $J$  = 2.7 Hz), 125.7 (d,  $J$  = 6.0 Hz), 40.7, 0.0. <sup>29</sup>Si NMR (99

MHz, CDCl<sub>3</sub>)  $\delta$  -4.0, -4.1, -4.2, -4.3. <sup>31</sup>P NMR (202 MHz, CDCl<sub>3</sub>)  $\delta$  -17.8 (t, *J* = 6.2 Hz). <sup>19</sup>F NMR (471 MHz, CDCl<sub>3</sub>)  $\delta$  -88.0, -88.2. HRMS (ESI): *m/z*: [M + H]<sup>+</sup> calculated for C<sub>51</sub>H<sub>60</sub>F<sub>2</sub>PSi<sub>4</sub>: 853.3472, Found: 853.3498.

#### IV. Preparation of prochiral Si-linked bisakynes 1.

##### a) General synthesis procedure of 1a-1m.

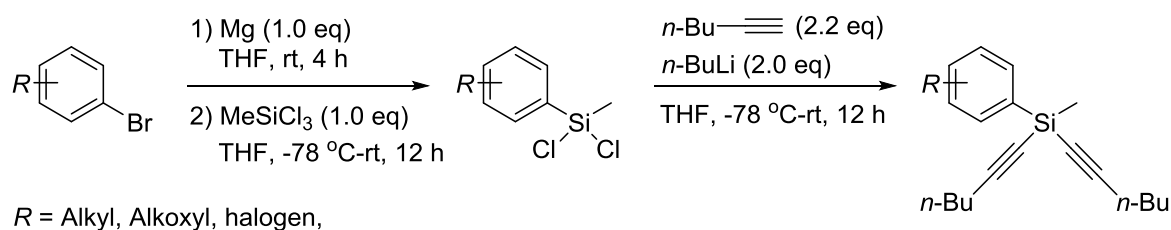

Under N<sub>2</sub> atmosphere a heat-gun dried two-neck flask with a reflux condenser was charged with magnesium (486 mg, 20.0 mmol, 1.0 eq) and THF. Then the Aryl halides (20.0 mmol, 1.0 eq) was added dropwise and the Grignard reagent formation started by heating with a heat gun. After the reaction had started, the reaction mixture was stirred for four hours at room temperature. Under N<sub>2</sub> atmosphere a Schlenk flask was charged with MeSiCl<sub>3</sub> (1.2 g, 20.0 mmol, 1.0 eq) and THF (1.0 mL pro mmol chlorosilane). Then this mixture was cooled at -78 °C and freshly prepared Grignard reagent (3.3 mL, 25.7 mmol, 1.0 eq) was added dropwise over 15 minutes and resultant solution was stirred for 12 h at room temperature, finally the white salt was filtered and hex-1-yn-1-yl lithium was added dropwise at -78 °C. The reaction mixture was brought to room temperature for 12h and quenched by saturated NH<sub>4</sub>Cl. The organic layer was dried over Na<sub>2</sub>SO<sub>4</sub> and concentrated under reduced pressure. The crude product was purified by silica gel chromatography (petroleum ether) to afford the product.

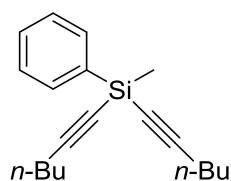

**Di(hex-1-yn-1-yl)(methyl)(phenyl)silane (1a)**, Colorless oil, Yield: 70%.  $^1\text{H}$  NMR (400 MHz,  $\text{CDCl}_3$ )  $\delta$  7.72 (dd,  $J = 6.7, 3.2$  Hz, 2H), 7.38 (d,  $J = 2.4$  Hz, 2H), 7.37 (d,  $J = 1.4$  Hz, 1H), 2.28 (t,  $J = 7.1$  Hz, 4H), 1.58-1.48 (m, 4H), 1.47-1.36 (m, 4H), 0.91 (t,  $J = 7.3$  Hz, 6H), 0.50 (s, 3H).  $^{13}\text{C}$  NMR (101 MHz,  $\text{CDCl}_3$ )  $\delta$  134.8, 133.4, 129.1, 127.3, 109.5, 79.4, 29.9, 21.4, 19.2, 13.0, 0.00. HRMS (ESI):  $m/z$ :  $[\text{M} + \text{Na}]^+$  calculated for  $\text{C}_{19}\text{H}_{26}\text{NaSi}$ : 305.1696, Found: 305.1709.

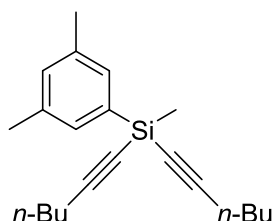

**(3,5-dimethylphenyl)di(hex-1-yn-1-yl)(methyl)silane (1b)**, Colorless oil, Yield: 76%.  $^1\text{H}$  NMR (400 MHz,  $\text{CDCl}_3$ )  $\delta$  7.33 (s, 2H), 7.00 (s, 1H), 2.32 (s, 6H), 2.26 (t,  $J = 7.0$  Hz, 4H), 1.58-1.46 (m, 4H), 1.46-1.37 (m, 4H), 0.91 (t,  $J = 7.3$  Hz, 6H), 0.48 (s, 3H).  $^{13}\text{C}$  NMR (101 MHz,  $\text{CDCl}_3$ )  $\delta$  136.5, 134.4, 131.1, 130.8, 109.1, 79.8, 29.9, 21.4, 20.7, 19.2, 13.0, 0.0. HRMS (ESI):  $m/z$ :  $[\text{M} + \text{Na}]^+$  calculated for  $\text{C}_{21}\text{H}_{30}\text{NaSi}$ : 333.2009, Found: 333.2024.

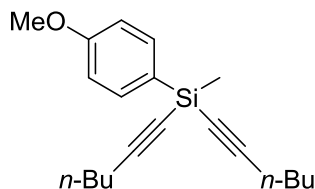

**Di(hex-1-yn-1-yl)(4-methoxyphenyl)(methyl)silane (1c)**, Colorless oil, Yield: 80%.  $^1\text{H}$  NMR (400 MHz,  $\text{CDCl}_3$ )  $\delta$  7.64 (d,  $J = 8.7$  Hz, 2H), 6.91 (d,  $J = 8.7$  Hz, 2H), 3.78 (s, 3H), 2.27 (t,  $J = 7.1$  Hz, 4H), 1.57-1.48 (m, 4H), 1.47-1.36 (m, 4H), 0.90 (t,  $J = 7.3$  Hz, 6H), 0.48 (s, 3H).  $^{13}\text{C}$  NMR (101 MHz,  $\text{CDCl}_3$ )  $\delta$  160.2, 134.7, 125.5, 112.9, 109.0, 79.6, 54.2, 29.8, 21.2, 19.0, 12.8, 0.0. HRMS (ESI):  $m/z$ :  $[\text{M} + \text{Na}]^+$  calculated for  $\text{C}_{20}\text{H}_{28}\text{NaOSi}$ : 335.1802, Found: 335.1815.



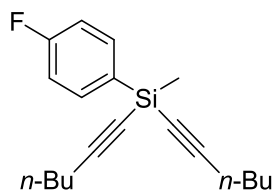

**(4-fluorophenyl)di(hex-1-yn-1-yl)(methyl)silane (1d)**, Colorless oil, Yield: 76%.  $^1\text{H}$  NMR (400 MHz,  $\text{CDCl}_3$ )  $\delta$  7.70 (dd,  $J = 8.6, 6.2$  Hz, 2H), 7.07 (t,  $J = 9.0$  Hz, 2H), 2.28 (t,  $J = 7.1$  Hz, 4H), 1.58-1.49 (m, 4H), 1.47-1.37 (m, 4H), 0.91 (t,  $J = 7.3$  Hz, 6H), 0.49 (s, 3H).  $^{13}\text{C}$  NMR (101 MHz,  $\text{CDCl}_3$ )  $\delta$  163.5 (d,  $^1J_{\text{FC}} = 248.8$  Hz, carbon of fluorine atom), 135.4 (d,  $^3J_{\text{FC}} = 7.7$  Hz, aromatic carbon *meta* to fluorine atom), 130.4 (d,  $^4J_{\text{FC}} = 3.7$  Hz, aromatic carbon *para* to fluorine atom), 114.3 (d,  $^2J_{\text{FC}} = 19.9$  Hz, aromatic carbon *ortho* to fluorine atom), 109.6, 79.2, 29.8, 21.3, 19.1, 12.9, 0.0. HRMS (ESI):  $m/z$ :  $[\text{M} + \text{Na}]^+$  calculated for  $\text{C}_{19}\text{H}_{25}\text{FNaSi}$ : 323.1602, Found: 323.1617.

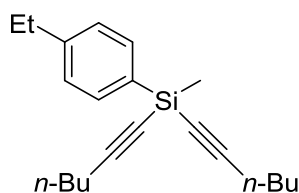

**(4-ethylphenyl)di(hex-1-yn-1-yl)(methyl)silane (1e)**, Colorless oil, Yield: 82%.  $^1\text{H}$  NMR (400 MHz,  $\text{CDCl}_3$ )  $\delta$  7.64 (d,  $J = 8.0$  Hz, 2H), 7.22 (d,  $J = 7.8$  Hz, 2H), 2.64 (q,  $J = 7.6$  Hz, 2H), 2.27 (t,  $J = 7.1$  Hz, 4H), 1.63-1.48 (m, 4H), 1.46-1.36 (m, 4H), 1.23 (t,  $J = 7.6$  Hz, 3H), 0.90 (t,  $J = 7.3$  Hz, 6H), 0.49 (s, 3H).  $^{13}\text{C}$  NMR (101 MHz,  $\text{CDCl}_3$ )  $\delta$  145.2, 133.4, 131.5, 126.9, 109.2, 79.6, 29.9, 28.3, 21.3, 19.1, 14.8, 12.9, 0.0. HRMS (ESI):  $m/z$ :  $[\text{M} + \text{Na}]^+$  calculated for  $\text{C}_{21}\text{H}_{30}\text{NaSi}$ : 333.2193, Found: 333.2201.

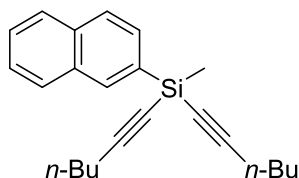

**Di(hex-1-yn-1-yl)(methyl)(naphthalen-2-yl)silane (1f)**, Colorless oil, Yield: 72%.  $^1\text{H}$  NMR (400 MHz,  $\text{CDCl}_3$ )  $\delta$  8.15 (s, 1H), 7.76-7.71 (m, 2H), 7.68 (d,  $J = 7.3$  Hz,

2H), 7.35 (d,  $J = 3.2$  Hz, 1H), 7.33 (d,  $J = 3.4$  Hz, 1H), 2.18 (t,  $J = 7.1$  Hz, 4H), 1.51-1.38 (m, 4H), 1.37-1.26 (m, 4H), 0.79 (t,  $J = 7.3$  Hz, 6H), 0.49 (s, 3H).  $^{13}\text{C}$  NMR (101 MHz,  $\text{CDCl}_3$ )  $\delta$  134.4, 133.5, 132.3, 132.2, 129.2, 127.6, 127.1, 126.6, 126.0, 125.3, 109.7, 79.5, 29.9, 21.4, 19.2, 13.0, 0.0. HRMS (ESI):  $m/z$ :  $[\text{M} + \text{Na}]^+$  calculated for  $\text{C}_{23}\text{H}_{28}\text{NaSi}$ : 355.1852, Found: 355.1864.

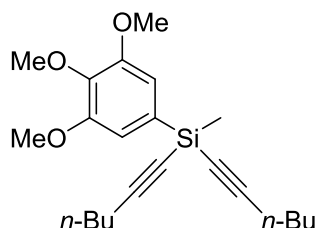

**Di(hex-1-yn-1-yl)(methyl)(3,4,5-trimethoxyphenyl)silane (1g)**, Colorless oil, Yield: 75%.  $^1\text{H}$  NMR (400 MHz,  $\text{CDCl}_3$ )  $\delta$  6.95 (s, 2H), 3.90 (s, 6H), 3.87 (s, 3H), 2.31 (t,  $J = 7.0$  Hz, 4H), 1.59-1.51 (m, 4H), 1.50-1.39 (m, 4H), 0.91 (t,  $J = 7.3$  Hz, 6H), 0.50 (s, 3H).  $^{13}\text{C}$  NMR (101 MHz,  $\text{CDCl}_3$ )  $\delta$  153.0, 139.6, 130.3, 110.7, 110.16, 80.0, 60.7, 56.0, 30.4, 21.9, 19.7, 13.6, 0.7. MS (EI)  $m/z$ : 372, 357, 341, 327, 315, 299, 248.

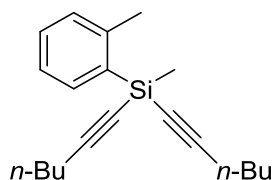

**Di(hex-1-yn-1-yl)(methyl)(o-tolyl)silane (1h)**, Colorless oil, Yield: 77%.  $^1\text{H}$  NMR (400 MHz,  $\text{CDCl}_3$ )  $\delta$  7.78 (dd,  $J = 7.4, 1.7$  Hz, 1H), 7.27 (td,  $J = 7.5, 1.6$  Hz, 1H), 7.17 (d,  $J = 7.3$  Hz, 1H), 7.13 (d,  $J = 7.9$  Hz, 1H), 2.60 (s, 3H), 2.24 (t,  $J = 7.1$  Hz, 4H), 1.54-1.45 (m, 4H), 1.44-1.34 (m, 4H), 0.89 (t,  $J = 7.3$  Hz, 6H), 0.56 (s, 3H).  $^{13}\text{C}$  NMR (101 MHz,  $\text{CDCl}_3$ )  $\delta$  143.3, 134.5, 132.5, 129.4, 129.1, 124.3, 109.1, 79.9, 29.8, 21.9, 21.3, 19.1, 12.9, 0.0. MS (EI)  $m/z$ : 296, 281, 266, 251, 209, 205, 91.

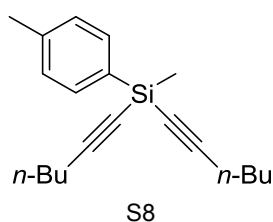

**Di(hex-1-yn-1-yl)(methyl)(p-tolyl)silane (1i)**, Colorless oil, Yield: 79%. <sup>1</sup>H NMR (400 MHz, CDCl<sub>3</sub>) δ 7.61 (d, *J* = 7.8 Hz, 2H), 7.20 (d, *J* = 7.8 Hz, 2H), 2.35 (s, 3H), 2.27 (t, *J* = 7.1 Hz, 4H), 1.53 (p, *J* = 6.9 Hz, 4H), 1.42 (dq, *J* = 14.2, 7.0 Hz, 4H), 0.90 (t, *J* = 7.3 Hz, 6H), 0.48 (s, 3H). <sup>13</sup>C NMR (101 MHz, CDCl<sub>3</sub>) δ 138.9, 133.4, 131.2, 128.0, 109.2, 79.6, 29.9, 21.3, 20.9, 19.1, 13.0, 0.00. MS (EI) *m/z*: 296, 281, 266, 251, 209, 205, 91.

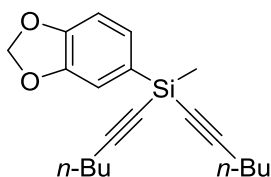

**Benzo[d][1,3]dioxol-5-yl di(hex-1-yn-1-yl)(methyl)silane (1j)**, Colorless oil, Yield: 82%. <sup>1</sup>H NMR (400 MHz, CDCl<sub>3</sub>) δ 7.21 (d, *J* = 7.7 Hz, 1H), 7.17 (s, 1H), 6.84 (d, *J* = 7.6 Hz, 1H), 5.91 (s, 2H), 2.27 (t, *J* = 7.1 Hz, 4H), 1.57-1.48 (m, 4H), 1.47-1.36 (m, 4H), 0.90 (t, *J* = 7.3 Hz, 6H), 0.47 (s, 3H). <sup>13</sup>C NMR (101 MHz, CDCl<sub>3</sub>) δ 148.3, 146.7, 127.6, 127.5, 112.6, 109.1, 107.8, 99.9, 79.4, 29.7, 21.2, 19.0, 12.8, 0.0. HRMS (ESI): *m/z*: [M + Na]<sup>+</sup> calculated for C<sub>20</sub>H<sub>26</sub>NaO<sub>2</sub>Si: 349.1594, Found: 349.1602.

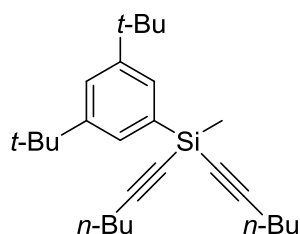

**(3,5-di-tert-butylphenyl) di(hex-1-yn-1-yl)(methyl)silane (1k)**, Colorless oil, Yield: 90%. <sup>1</sup>H NMR (400 MHz, CDCl<sub>3</sub>) δ 7.61 (d, *J* = 1.7 Hz, 2H), 7.48 (t, *J* = 2.1 Hz, 1H), 2.29 (t, *J* = 6.9 Hz, 4H), 1.59-1.49 (m, 4H), 1.48-1.40 (m, 4H), 1.35 (s, 18H), 0.91 (t, *J* = 7.2 Hz, 6H), 0.50 (s, 3H). <sup>13</sup>C NMR (101 MHz, CDCl<sub>3</sub>) δ 148.8, 133.2, 127.2, 123.0, 108.7, 79.6, 34.0, 30.6, 29.6, 21.0, 18.9, 12.7, 0.0. HRMS (ESI): *m/z*: [M + Na]<sup>+</sup> calculated for C<sub>27</sub>H<sub>42</sub>NaSi: 417.2948, Found: 417.2950.

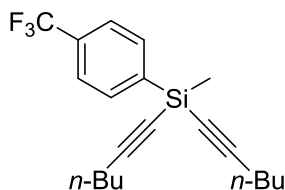

**Di(hex-1-yn-1-yl)(methyl)(4-(trifluoromethyl)phenyl)silane (1)**, Colorless oil, Yield: 65%.  $^1\text{H}$  NMR (400 MHz,  $\text{CDCl}_3$ )  $\delta$  7.86 (d,  $J = 8.0$  Hz, 1H), 7.62 (d,  $J = 8.1$  Hz, 1H), 2.29 (t,  $J = 7.1$  Hz, 2H), 1.60-1.49 (m, 3H), 1.47-1.37 (m, 3H), 0.91 (t,  $J = 7.3$  Hz, 3H), 0.52 (s, 1H).  $^{13}\text{C}$  NMR (101 MHz,  $\text{CDCl}_3$ )  $\delta$  140.2, 134.0, 131.3 (d,  $^2J_{\text{FC}} = 32.2$  Hz, aromatic carbon bearing  $\text{CF}_3$  group), 123.9 (q,  $^1J_{\text{FC}}=273.6$  Hz, carbon of  $\text{CF}_3$  group), 124.0 (d,  $^3J_{\text{FC}} = 3.7$  Hz, aromatic carbon *ortho* to  $\text{CF}_3$  group), 110.5, 78.9, 30.1, 21.6, 19.4, 13.2, 0.0. HRMS (ESI):  $m/z$ :  $[\text{M} + \text{Na}]^+$  calculated for  $\text{C}_{20}\text{H}_{25}\text{F}_3\text{NaSi}$ : 373.1570, Found: 373.1572.

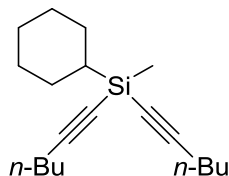

**Cyclohexyldi(hex-1-yn-1-yl)(methyl)silane (1m)**, Colorless oil, Yield: 52%.  $^1\text{H}$  NMR (400 MHz,  $\text{CDCl}_3$ )  $\delta$  2.05 (t,  $J = 7.0$  Hz, 4H), 1.66-1.50 (m, 5H), 1.38-1.28 (m, 4H), 1.27-1.18 (m, 4H), 1.11-0.97 (m, 5H), 0.73 (t,  $J = 7.3$  Hz, 6H), 0.58-0.46 (m, 1H), 0.00 (s, 3H).  $^{13}\text{C}$  NMR (101 MHz,  $\text{CDCl}_3$ )  $\delta$  108.6, 80.0, 30.6, 27.7, 26.9, 26.8, 25.9, 21.8, 19.6, 13.5, -3.01. HRMS (ESI):  $m/z$ :  $[\text{M} + \text{Na}]^+$  calculated for  $\text{C}_{19}\text{H}_{32}\text{NaSi}$ : 311.2165, Found: 311.2180.

#### b) General synthesis procedure of 1n-1q.

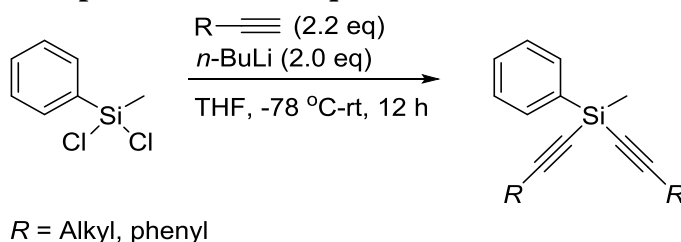

To a solution of terminal alkyne in THF was added dropwise  $n\text{-BuLi}$  under nitrogen atmosphere at  $-78\text{ }^\circ\text{C}$ . The reaction mixture was be stirred for 30 min at

-78 °C, then the MePhSiCl<sub>2</sub> was added dropwise into the above reaction mixture. The reaction mixture was brought to room temperature for 12 h and quenched by saturated NH<sub>4</sub>Cl. The aqueous layer was extracted with diethyl ether, and the organic layer was washed with brine and dried over Na<sub>2</sub>SO<sub>4</sub> and concentrated under reduced pressure. The crude product was purified by silica gel chromatography (petroleum ether) to afford the product.

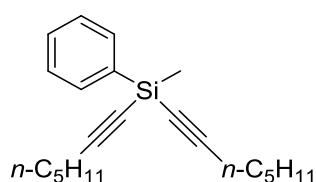

**Di(hept-1-yn-1-yl)(methyl)(phenyl)silane (1n)**, Colorless oil, Yield: 97%. <sup>1</sup>H NMR (400 MHz, CDCl<sub>3</sub>) δ 7.73 (dd, *J* = 6.5, 3.0 Hz, 2H), 7.36 (d, *J* = 2.2 Hz, 2H), 7.35 (d, *J* = 1.3 Hz, 1H), 2.32-2.18 (m, 4H), 1.65-1.47 (m, 4H), 1.44-1.24 (m, 8H), 0.89 (t, *J* = 7.3 Hz, 6H), 0.50 (s, 3H). <sup>13</sup>C NMR (101 MHz, CDCl<sub>3</sub>) δ 134.8, 133.3, 129.0, 127.2, 109.4, 79.5, 30.5, 27.5, 21.6, 19.4, 13.4, 0.0. HRMS (ESI): *m/z*: [M + Na]<sup>+</sup> calculated for C<sub>21</sub>H<sub>30</sub>NaSi: 333.2009, Found: 333.2011.

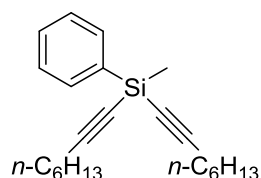

**Methyldi(oct-1-yn-1-yl)(phenyl)silane (1o)**, Colorless oil, Yield: 99%. <sup>1</sup>H NMR (400 MHz, CDCl<sub>3</sub>) δ 7.72 (dd, *J* = 6.5, 3.1 Hz, 2H), 7.36 (d, *J* = 2.1 Hz, 1H), 7.35 (d, *J* = 1.8 Hz, 1H), 2.26 (t, *J* = 7.1 Hz, 4H), 1.63-1.48 (m, 4H), 1.44-1.34 (m, 4H), 1.33-1.20 (m, 8H), 0.88 (t, *J* = 7.0 Hz, 6H), 0.50 (s, 3H). <sup>13</sup>C NMR (101 MHz, CDCl<sub>3</sub>) δ 134.8, 133.4, 129.0, 127.2, 109.5, 79.5, 30.7, 27.9, 27.8, 22.0, 19.5, 13.4, 0.0. HRMS (ESI): *m/z*: [M + Na]<sup>+</sup> calculated for C<sub>23</sub>H<sub>34</sub>NaSi: 361.2322, Found: 361.2337.

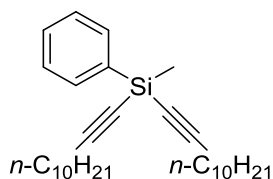

**Di(dodec-1-yn-1-yl)(methyl)(phenyl)silane (1p)**, Colorless oil, Yield: 92%.  $^1\text{H}$  NMR (400 MHz,  $\text{CDCl}_3$ )  $\delta$  7.72 (dd,  $J = 6.5, 3.1$  Hz, 2H), 7.35 (d,  $J = 2.2$  Hz, 1H), 7.34 (d,  $J = 1.4$  Hz, 1H), 2.25 (t,  $J = 7.1$  Hz, 3H), 1.59-1.47 (m, 2H), 1.43-1.34 (m, 2H), 1.33-1.20 (m, 24H), 0.88 (t,  $J = 6.8$  Hz, 6H), 0.49 (s, 3H).  $^{13}\text{C}$  NMR (101 MHz,  $\text{CDCl}_3$ )  $\delta$  134.8, 133.4, 129.0, 127.2, 109.4, 79.5, 31.4, 29.0, 29.0, 28.8, 28.6, 28.3, 27.9, 22.2, 19.5, 13.5, 0.0. HRMS (ESI):  $m/z$ :  $[\text{M} + \text{Na}]^+$  calculated for  $\text{C}_{31}\text{H}_{50}\text{NaSi}$ : 473.3574, Found: 473.3579.

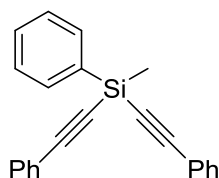

**Methyl(phenyl)bis(phenylethynyl)silane (1q)**, Colorless oil, Yield: 85%.  $^1\text{H}$  NMR (400 MHz,  $\text{CDCl}_3$ )  $\delta$  7.86 (dd,  $J = 6.4, 3.0$  Hz, 2H), 7.53 (d,  $J = 2.2$  Hz, 2H), 7.51 (d,  $J = 2.2$  Hz, 2H), 7.45-7.39 (m, 3H), 7.39-7.21 (m, 6H), 0.72 (s, 1H).  $^{13}\text{C}$  NMR (101 MHz,  $\text{CDCl}_3$ )  $\delta$  134.0, 132.0, 129.9, 128.9, 128.0, 127.9, 122.3, 107.3, 88.9, 0.0. HRMS (ESI):  $m/z$ :  $[\text{M} + \text{Na}]^+$  calculated for  $\text{C}_{23}\text{H}_{18}\text{NaSi}$ : 345.1070, Found: 345.1075.

### c) Synthesis of procedure of 1r

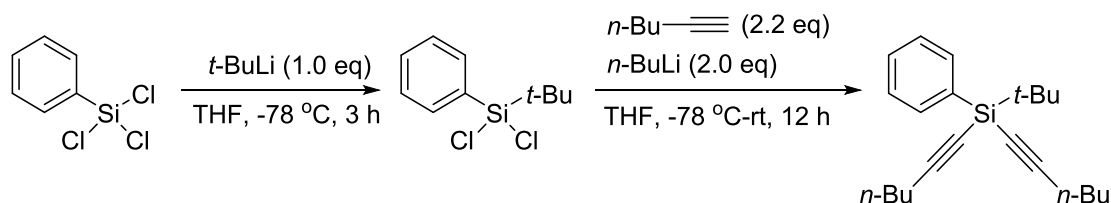

To a solution of  $\text{MeSiCl}_3$  (1.5 g, 10.0 mmol, 1.0 eq) in THF (20 mL) was added dropwise  $t\text{-BuLi}$  (6.25 mL, 1.6 M in Hex, 1.0 eq) under nitrogen atmosphere at  $-78\text{ }^\circ\text{C}$ , then the reaction mixture was be stirred for 3 hours at the same temperature, finally

the white salt was filtered and hex-1-yn-1-yl lithium was added dropwise at  $-78\text{ }^{\circ}\text{C}$ . The reaction mixture was brought to room temperature for 12h and quenched by saturated  $\text{NH}_4\text{Cl}$  (20 mL) was added. The aqueous layer was extracted with diethyl ether (3 x 20 mL), and the organic layer was washed with brine (20 mL), dried over  $\text{NaSO}_4$ , and concentrated under reduced pressure. Silica gel fresh column chromatography (petroleum ether) gave **1r** (2.5 g, 7.7 mmol, 77%) as colorless oil.

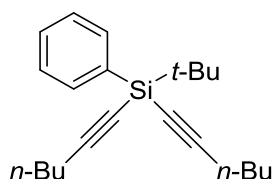

**Tert-butyldi(hex-1-yn-1-yl)(phenyl)silane (1r)**, Colorless oil, Yield: 77%.  $^1\text{H}$  NMR (400 MHz,  $\text{CDCl}_3$ )  $\delta$  7.74 (dd,  $J = 7.2, 2.0$  Hz, 2H), 7.42-7.29 (m, 3H), 2.31 (t,  $J = 6.9$  Hz, 4H), 1.60-1.51 (m, 4H), 1.51-1.41 (m, 4H), 0.99 (s, 9H), 0.92 (t,  $J = 7.3$  Hz, 6H).  $^{13}\text{C}$  NMR (101 MHz,  $\text{CDCl}_3$ )  $\delta$  135.1, 133.1, 129.6, 127.5, 110.5, 78.1, 30.6, 25.9, 22.0, 19.8, 18.1, 13.6. HRMS (ESI):  $m/z$ :  $[\text{M} + \text{Na}]^+$  calculated for  $\text{C}_{22}\text{H}_{32}\text{NaSi}$ : 347.2165, Found: 347.2181.

## V. General procedure for Pt(0)-catalyzed diboration of Si-linked bisalkynes (**1**) with Bis(pinacolato)diboron (**2a**)

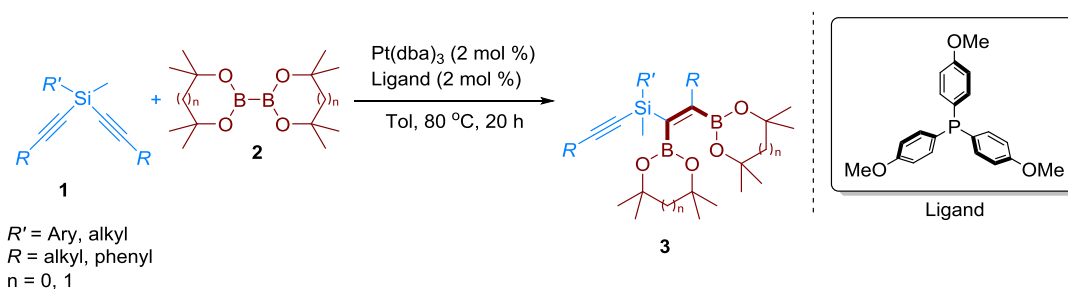

To the  $\text{Pt}(\text{dba})_3$  (2.7 mg, 0.002 mmol, 2 mol %) catalysis in anhydrous Toluene (0.5 mL), Ligand (0.7 mg, 0.002 mmol, 2 mol %) was added. The mixture was stirred at room temperature for 30 minutes, then di(hex-1-yn-1-yl)(methyl)(phenyl)silane and derivatives **1** (0.1 mmol, 1.0 eq) and Bis(pinacolato)diboron and derivatives **2a** (0.12

mmol, 1.2 eq) was added. The reaction was allowed to proceed for 20h at 80 °C in a 25 mL of sealed tube. The reaction was diluted with Et<sub>2</sub>O and the mixture was filtered through Celite. The organic layer was dried over Na<sub>2</sub>SO<sub>4</sub> and concentrated under reduced pressure. The crude product was purified by silica gel chromatography (petroleum ether: ethyl acetate= 50:1) to afford the product.

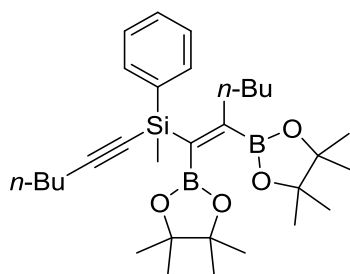

**(Z)-(1,2-bis(4,4,5,5-tetramethyl-1,3,2-dioxaborolan-2-yl)hex-1-en-1-yl)(hex-1-yn-1-yl)(methyl)(phenyl)silane (3a)**, Colorless oil, Yield: 88%. <sup>1</sup>H NMR (400 MHz, CDCl<sub>3</sub>) δ 7.70 (dd, *J* = 6.1, 3.0 Hz, 2H), 7.31 (d, *J* = 2.3 Hz, 2H), 7.30 (d, *J* = 1.4 Hz, 1H), 2.43 (t, *J* = 7.4 Hz, 2H), 2.25 (t, *J* = 7.0 Hz, 2H), 1.56-1.47 (m, 2H), 1.45-1.37 (m, 2H), 1.27 (s, 12H), 1.22 (s, 6H), 1.19-1.10 (m, 10H), 0.90 (t, *J* = 7.2 Hz, 3H), 0.75 (t, *J* = 6.8 Hz, 3H), 0.54 (s, 3H). <sup>13</sup>C NMR (101 MHz, CDCl<sub>3</sub>) δ 138.4, 134.1, 128.2, 126.8, 108.9, 83.0, 82.7, 82.0, 38.4, 31.0, 30.0, 24.8, 24.8, 24.2, 24.2, 22.4, 21.4, 19.3, 13.4, 13.0, 0.0. HRMS (ESI): *m/z*: [M + Na]<sup>+</sup> calculated for C<sub>31</sub>H<sub>50</sub>B<sub>2</sub>NaO<sub>4</sub>Si: 559.3568, Found: 559.3567.

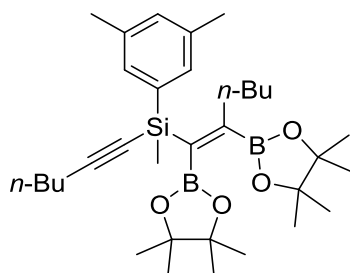

**(Z)-(1,2-bis(4,4,5,5-tetramethyl-1,3,2-dioxaborolan-2-yl)hex-1-en-1-yl)(3,5-dimethylphenyl)(hex-1-yn-1-yl)(methyl)silane (3b)**, Colorless oil, Yield: 89%. <sup>1</sup>H NMR (400 MHz, CDCl<sub>3</sub>) δ 7.24 (s, 2H), 6.87 (s, 1H), 2.37 (t, *J* = 7.5 Hz, 2H), 2.21 (s, 6H), 2.17 (t, *J* = 8.0 Hz, 3H), 1.48-1.40 (m, 2H), 1.39-1.30 (m, 2H), 1.22-1.05 (m, 28H),



0.83 (t,  $J = 7.1$  Hz, 3H), 0.70 (t,  $J = 6.8$  Hz, 3H), 0.46 (s, 3H).  $^{13}\text{C}$  NMR (101 MHz,  $\text{CDCl}_3$ )  $\delta$  136.3, 135.3, 131.3, 129.3, 108.2, 82.4, 82.0, 81.7, 37.8, 30.5, 29.3, 24.2, 24.1, 23.6, 21.8, 20.7, 20.1, 18.7, 12.8, 12.4, -0.7. HRMS (ESI):  $m/z$ :  $[\text{M} + \text{Na}]^+$  calculated for  $\text{C}_{33}\text{H}_{54}\text{B}_2\text{NaO}_4\text{Si}$ : 587.3882, Found: 587.3891.

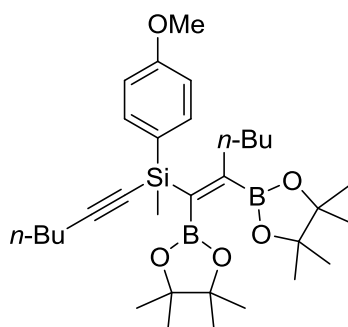

**(Z)-(1,2-bis(4,4,5,5-tetramethyl-1,3,2-dioxaborolan-2-yl)hex-1-en-1-yl)(hex-1-yn-1-yl)(4-methoxyphenyl)(methyl)silane (3c)**, Colorless oil, Yield: 90%.  $^1\text{H}$  NMR (400 MHz,  $\text{CDCl}_3$ )  $\delta$  7.54 (d,  $J = 6.8$  Hz, 2H), 6.78 (d,  $J = 6.9$  Hz, 2H), 3.69 (s, 3H), 2.35 (t,  $J = 7.3$  Hz, 2H), 2.16 (t,  $J = 6.9$  Hz, 2H), 1.49-1.36 (m, 2H), 1.38-1.28 (m, 2H), 1.18 (s, 12H), 1.14 (s, 6H), 1.13-1.03 (m, 10H), 0.82 (t,  $J = 7.1$  Hz, 3H), 0.69 (t,  $J = 6.7$  Hz, 3H), 0.44 (s, 3H).  $^{13}\text{C}$  NMR (101 MHz,  $\text{CDCl}_3$ )  $\delta$  159.6, 135.3, 128.1, 112.4, 108.4, 82.7, 82.4, 82.1, 54.1, 38.0, 30.8, 29.7, 24.6, 24.5, 24.0, 23.9, 22.2, 21.1, 19.0, 13.1, 12.7, 0.0. HRMS (ESI):  $m/z$ :  $[\text{M} + \text{Na}]^+$  calculated for  $\text{C}_{32}\text{H}_{52}\text{B}_2\text{NaO}_5\text{Si}$ : 589.3674, Found: 589.3691.

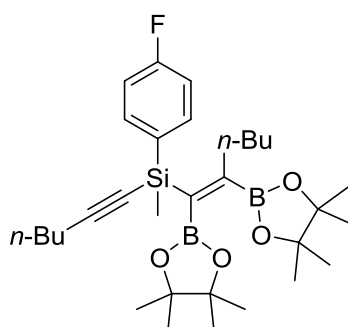

**(Z)-(1,2-bis(4,4,5,5-tetramethyl-1,3,2-dioxaborolan-2-yl)hex-1-en-1-yl)(4-fluorophenyl)(hex-1-yn-1-yl)(methyl)silane (3d)**, Colorless oil, Yield: 90%.  $^1\text{H}$  NMR (400 MHz,  $\text{CDCl}_3$ )  $\delta$  7.60 (dd,  $J = 7.7, 5.7$  Hz, 2H), 6.92 (t,  $J = 8.2$  Hz, 2H), 2.35 (t,  $J = 7.5$

Hz, 2H), 2.17 (t,  $J = 7.1$  Hz, 2H), 1.49-1.37 (m, 2H), 1.40-1.26 (m, 2H), 1.19 (s, 12H), 1.15 (s, 6H), 1.12-1.02 (m, 10H), 0.82 (t,  $J = 7.3$  Hz, 3H), 0.69 (t,  $J = 7.0$  Hz, 3H), 0.45 (s, 3H).  $^{13}\text{C}$  NMR (101 MHz,  $\text{CDCl}_3$ )  $\delta$  162.9 (d,  $^1J_{\text{FC}} = 247.5$  Hz, carbon of fluorine atom), 135.9 (d,  $^3J_{\text{FC}} = 7.4$  Hz, aromatic carbon *meta* to fluorine atom), 132.9 (d,  $^4J_{\text{FC}} = 3.6$  Hz, aromatic carbon *para* to fluorine atom), 113.7 (d,  $^2J_{\text{FC}} = 19.6$  Hz, aromatic carbon *ortho* to fluorine atom), 109.0, 82.9, 82.6, 81.7, 38.2, 30.8, 29.8, 24.6, 24.6, 24.0, 24.0, 22.2, 21.2, 19.0, 13.1, 12.8, 0.0. HRMS (ESI):  $m/z$ :  $[\text{M} + \text{Na}]^+$  calculated for  $\text{C}_{32}\text{H}_{52}\text{B}_2\text{NaO}_5\text{Si}$ : 589.3674, Found: 589.3691.

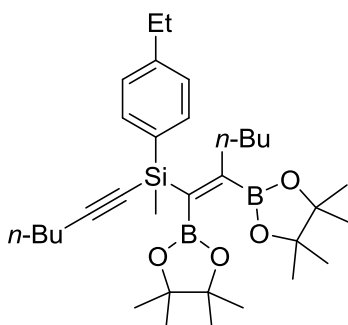

**(Z)-(1,2-bis(4,4,5,5-tetramethyl-1,3,2-dioxaborolan-2-yl)hex-1-en-1-yl)(4-ethylphenyl)(hex-1-yn-1-yl)(methyl)silane (3e)**, Colorless oil, Yield: 88%.  $^1\text{H}$  NMR (400 MHz,  $\text{CDCl}_3$ )  $\delta$  7.54 (d,  $J = 7.8$  Hz, 2H), 7.06 (d,  $J = 7.7$  Hz, 2H), 2.53 (q,  $J = 7.6$  Hz, 2H), 2.36 (t,  $J = 7.6$  Hz, 2H), 2.16 (t,  $J = 6.9$  Hz, 2H), 1.47-1.38 (m, 2H), 1.37-1.29 (m, 2H), 1.18 (s, 12H), 1.14-1.06 (m, 16H), 0.82 (t,  $J = 7.3$  Hz, 3H), 0.68 (t,  $J = 7.1$  Hz, 3H), 0.45 (s, 3H).  $^{13}\text{C}$  NMR (101 MHz,  $\text{CDCl}_3$ )  $\delta$  144.3, 134.2, 134.0, 126.4, 108.6, 82.9, 82.6, 82.2, 38.3, 31.0, 30.0, 28.3, 24.8, 24.7, 24.2, 24.2, 22.4, 21.3, 19.2, 15.0, 13.4, 12.9, 0.0. HRMS (ESI):  $m/z$ :  $[\text{M} + \text{Na}]^+$  calculated for  $\text{C}_{33}\text{H}_{54}\text{B}_2\text{NaO}_4\text{Si}$ : 587.3882, Found: 587.3896.

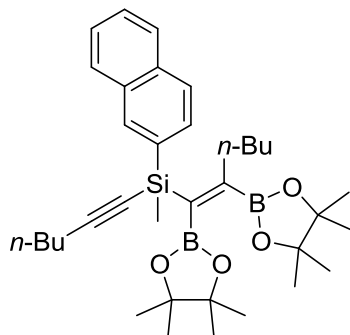

**(Z)-(1,2-bis(4,4,5,5-tetramethyl-1,3,2-dioxaborolan-2-yl)hex-1-en-1-yl)(hex-1-yn-1-yl)(methyl)(naphthalen-2-yl)silane (3f)**, Colorless oil, Yield: 88%.  $^1\text{H}$  NMR (400 MHz,  $\text{CDCl}_3$ )  $\delta$  8.13 (s, 1H), 7.78-7.71 (m, 1H), 7.72-7.66 (m, 3H), 7.35 (d,  $J = 2.9$  Hz, 1H), 7.34 (d,  $J = 3.5$  Hz, 1H), 2.38 (t,  $J = 7.6$  Hz, 2H), 2.20 (t,  $J = 6.9$  Hz, 2H), 1.51-1.39 (m, 2H), 1.41-1.29 (m, 2H), 1.17 (s, 12H), 1.10 (s, 6H), 1.08-0.94 (m, 10H), 0.83 (t,  $J = 7.1$  Hz, 3H), 0.57 (t,  $J = 6.9$  Hz, 3H), 0.54 (s, 3H).  $^{13}\text{C}$  NMR (101 MHz,  $\text{CDCl}_3$ )  $\delta$  135.0, 134.6, 133.1, 132.2, 130.4, 127.5, 126.9, 125.9, 125.4, 124.8, 109.1, 82.9, 82.7, 82.0, 38.4, 30.9, 29.9, 24.7, 24.6, 24.2, 24.1, 22., 21.2, 19.2, 13.2, 12.9, 0.0. MS (EI)  $m/z$ : 586, 502, 487, 459, 445, 361, 127.

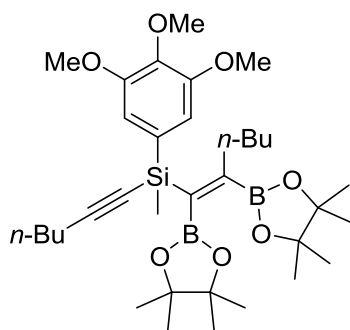

**(Z)-(1,2-bis(4,4,5,5-tetramethyl-1,3,2-dioxaborolan-2-yl)hex-1-en-1-yl)(hex-1-yn-1-yl)(methyl)(3,4,5-trimethoxyphenyl)silane (3g)**, Colorless oil, Yield: 76%.  $^1\text{H}$  NMR (400 MHz,  $\text{CDCl}_3$ )  $\delta$  6.90 (s, 2H), 3.79 (s, 6H), 3.76 (s, 3H), 2.42 (t,  $J = 7.9$  Hz, 2H), 2.19 (t,  $J = 6.8$  Hz, 2H), 1.50-1.38 (m, 2H), 1.41-1.31 (m, 2H), 1.25-1.13 (m, 16H), 1.09 (s, 6H), 1.05 (s, 6H), 0.82 (t,  $J = 7.1$  Hz, 3H), 0.75 (t,  $J = 7.1$  Hz, 3H), 0.49 (s, 3H).  $^{13}\text{C}$  NMR (101 MHz,  $\text{CDCl}_3$ )  $\delta$  152.0, 138.3, 132.2, 111.1, 109.1, 83.0, 82.7, 82.0, 60.0, 55.4, 38.3, 31.2, 30.0, 24.8, 24.7, 24.2, 24.2, 22.5, 21.4, 19.2, 13.4, 13.0, 0.0. MS (EI)  $m/z$ : 626, 611, 569, 527, 459, 443, 167.

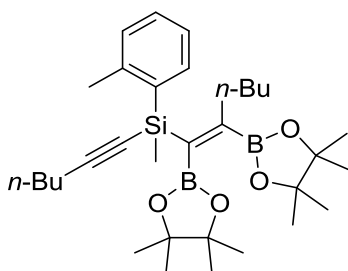

**(Z)-(1,2-bis(4,4,5,5-tetramethyl-1,3,2-dioxaborolan-2-yl)hex-1-en-1-yl)(hex-1-yn-1-yl)(methyl)(o-tolyl)silane (3h)**, Colorless oil, Yield: 90%.  $^1\text{H}$  NMR (400 MHz,  $\text{CDCl}_3$ )  $\delta$  7.64 (dd,  $J = 7.4, 1.3$  Hz, 1H), 7.14 (td,  $J = 8.1, 7.5, 1.6$  Hz, 1H), 7.05 (d,  $J = 7.2$  Hz, 1H), 7.01 (t,  $J = 7.4$  Hz, 1H), 2.42 (s, 3H), 2.32-2.26 (m, 2H), 2.14 (t,  $J = 7.0$  Hz, 2H), 1.46-1.37 (m, 2H), 1.37-1.27 (m, 2H), 1.18 (s, 12H), 1.12 (s, 6H), 1.10 (s, 6H), 1.05-0.90 (m, 4H), 0.80 (t,  $J = 7.2$  Hz, 3H), 0.63 (t,  $J = 7.1$  Hz, 3H), 0.51 (s, 3H).  $^{13}\text{C}$  NMR (101 MHz,  $\text{CDCl}_3$ )  $\delta$  143.8, 135.8, 134.7, 128.8, 128.6, 124.1, 108.6, 83.0, 82.7, 82.6, 38.1, 31.1, 29.9, 24.84, 24.7, 24.2, 24.2, 23.0, 22.4, 21.4, 19.4, 13.4, 13.0, 0.0. HRMS (ESI):  $m/z$ :  $[\text{M} + \text{Na}]^+$  calculated for  $\text{C}_{32}\text{H}_{52}\text{B}_2\text{NaO}_4\text{Si}$ : 573.3725, Found: 573.3739.

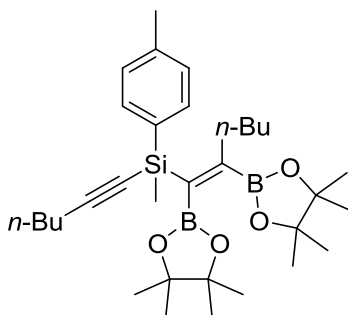

**(Z)-(1,2-bis(4,4,5,5-tetramethyl-1,3,2-dioxaborolan-2-yl)hex-1-en-1-yl)(hex-1-yn-1-yl)(methyl)(p-tolyl)silane (3i)**, Colorless oil, Yield: 90%.  $^1\text{H}$  NMR (400 MHz,  $\text{CDCl}_3$ )  $\delta$  7.59 (d,  $J = 7.3$  Hz, 2H), 7.13 (d,  $J = 7.5$  Hz, 2H), 2.41 (t,  $J = 7.6$  Hz, 2H), 2.32 (s, 3H), 2.24 (t,  $J = 7.0$  Hz, 2H), 1.56-1.45 (m, 2H), 1.45-1.35 (m, 2H), 1.26 (s, 12H), 1.23 (s, 6H), 1.21-1.12 (m, 10H), 0.90 (t,  $J = 7.0$  Hz, 3H), 0.75 (t,  $J = 6.6$  Hz, 3H), 0.52 (s, 3H).  $^{13}\text{C}$  NMR (101 MHz,  $\text{CDCl}_3$ )  $\delta$  137.9, 134.0, 133.7, 127.5, 108.8, 82.9, 82.6, 82.0, 38.3, 30.9, 29.9, 24.7, 24.7, 24.1, 24.1, 22.4, 21.3, 20.8, 19.2, 13.3,

12.9, 0.0. MS (EI)  $m/z$ : 550, 535, 451, 367, 352, 337, 91.

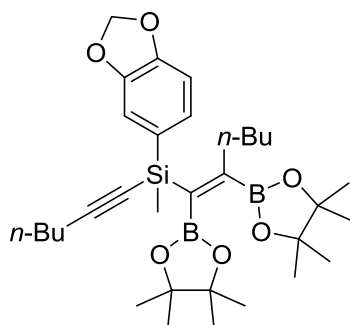

**(Z)-benzo[d][1,3]dioxol-5-yl(1,2-bis(4,4,5,5-tetramethyl-1,3,2-dioxaborolan-2-yl)hex-1-en-1-yl)(methyl)silane (3j)**, Colorless oil, Yield: 85%.  $^1\text{H}$  NMR (400 MHz,  $\text{CDCl}_3$ )  $\delta$  7.21-7.14 (m, 2H), 6.81 (d,  $J = 7.4$  Hz, 1H), 2.42 (t,  $J = 7.1$  Hz, 2H), 2.24 (t,  $J = 6.9$  Hz, 2H), 1.55-1.46 (m, 2H), 1.46-1.35 (m, 2H), 1.27 (s, 12H), 1.24 (s, 6H), 1.23-1.14 (m, 10H), 0.90 (t,  $J = 7.0$  Hz, 3H), 0.78 (t,  $J = 6.5$  Hz, 3H), 0.51 (s, 3H).  $^{13}\text{C}$  NMR (101 MHz,  $\text{CDCl}_3$ )  $\delta$  147.0, 145.6, 129.6, 127.5, 112.9, 108.2, 106.8, 99.0, 82.3, 82.0, 81.2, 37.7, 30.3, 29.21, 24.1, 24.1, 23.5, 23.5, 21.7, 20.7, 18.5, 12.7, 12.3, 0.5. HRMS (ESI):  $m/z$ :  $[\text{M} + \text{Na}]^+$  calculated for  $\text{C}_{32}\text{H}_{50}\text{B}_2\text{NaO}_6\text{Si}$ : 603.3467, Found: 603.3483.

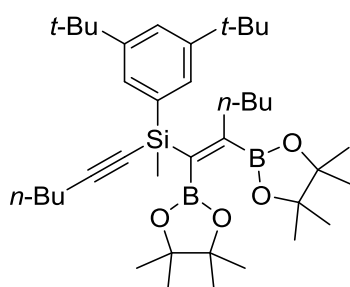

**(Z)-(1,2-bis(4,4,5,5-tetramethyl-1,3,2-dioxaborolan-2-yl)hex-1-en-1-yl)(3,5-di-tert-butylphenyl)(methyl)silane (3k)**, Colorless oil, Yield: 81%.  $^1\text{H}$  NMR (400 MHz,  $\text{CDCl}_3$ )  $\delta$  7.60 (s, 2H), 7.39 (s, 1H), 2.53-2.42 (m, 2H), 2.25 (t,  $J = 6.7$  Hz, 2H), 1.55-1.46 (m, 2H), 1.46-1.38 (m, 2H), 1.31 (s, 18H), 1.26 (s, 12H), 1.19-1.10 (m, 16H), 0.89 (t,  $J = 6.8$  Hz, 3H), 0.76 (t,  $J = 7.0$  Hz, 3H), 0.57 (s, 3H).  $^{13}\text{C}$  NMR (101 MHz,  $\text{CDCl}_3$ )  $\delta$  146.8, 134.3, 127.1, 121.7, 107.0, 81.5, 81.2, 81.1, 36.9, 32.8, 29.5, 28.6, 23.4, 23.4, 22.8, 22.8, 21.0, 20.0, 17.9, 12.0, 11.6, -1.5. HRMS (ESI):

m/z: [M + Na]<sup>+</sup> calculated for C<sub>39</sub>H<sub>66</sub>B<sub>2</sub>NaO<sub>4</sub>Si: 671.4822, Found: 671.4838.

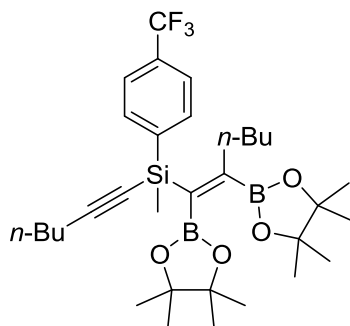

**(Z)-(1,2-bis(4,4,5,5-tetramethyl-1,3,2-dioxaborolan-2-yl)hex-1-en-1-yl)(hex-1-yn-1-yl)(methyl)(4-(trifluoromethyl)phenyl)silane (3)**, Colorless oil, Yield: 76%. <sup>1</sup>H NMR (400 MHz, CDCl<sub>3</sub>) δ 7.83 (d, *J* = 7.6 Hz, 2H), 7.56 (d, *J* = 7.8 Hz, 2H), 2.41 (t, *J* = 7.5 Hz, 2H), 2.26 (t, *J* = 7.1 Hz, 2H), 1.58-1.47 (m, 2H), 1.46-1.37 (m, 2H), 1.27 (s, 12H), 1.23 (s, 6H), 1.19 (s, 6H), 1.15-1.08 (m, 4H), 0.91 (t, *J* = 7.3 Hz, 3H), 0.74 (t, *J* = 6.8 Hz, 3H), 0.55 (s, 3H). <sup>13</sup>C NMR (101 MHz, CDCl<sub>3</sub>) δ 143.0, 134.5, 130.3 (d, <sup>2</sup>*J*<sub>FC</sub> = 29.1 Hz, aromatic carbon bearing CF<sub>3</sub> group), 23.9 (q, <sup>1</sup>*J*<sub>FC</sub> = 273.6 Hz, carbon of CF<sub>3</sub> group), 123.48 (d, <sup>3</sup>*J*<sub>FC</sub> = 3.9 Hz, aromatic carbon *ortho* to CF<sub>3</sub> group), 109.9, 83.3, 83.0, 81.3, 38.8, 31.1, 30.0, 24.9, 24.9, 24.4, 24.4, 22.6, 21.5, 19.4, 13.5, 13.1, 0.0. HRMS (ESI): m/z: [M + Na]<sup>+</sup> calculated for C<sub>32</sub>H<sub>49</sub>B<sub>2</sub>F<sub>3</sub>NaO<sub>4</sub>Si: 627.3442, Found: 627.3420.

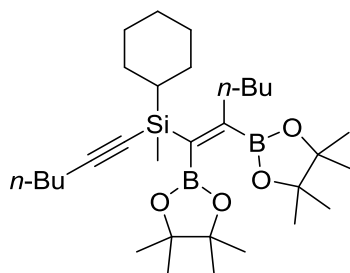

**(Z)-(1,2-bis(4,4,5,5-tetramethyl-1,3,2-dioxaborolan-2-yl)hex-1-en-1-yl)(cyclohexyl)(methyl)silane (3m)**, Colorless oil, Yield: 70%. <sup>1</sup>H NMR (400 MHz, CDCl<sub>3</sub>) δ 2.50-2.41 (m, 2H), 2.16 (t, *J* = 6.8 Hz, 2H), 1.84-1.61 (m, 5H), 1.50-1.20 (m, 38H), 0.87 (t, *J* = 7.0 Hz, 6H), 0.20 (s, 3H). <sup>13</sup>C NMR (101 MHz, CDCl<sub>3</sub>) δ 110.6, 85.8, 85.5, 85.5, 41.3, 34.5, 33.0, 30.5, 30.5, 30.1, 29.7, 29.3, 28.7, 27.8, 27.2, 25.5, 24.3, 22.1, 16.5, 15.9, 0.0. HRMS (ESI): m/z: [M + Na]<sup>+</sup> calculated for

C<sub>31</sub>H<sub>56</sub>B<sub>2</sub>NaO<sub>4</sub>Si: 565.4037, Found: 565.4047.

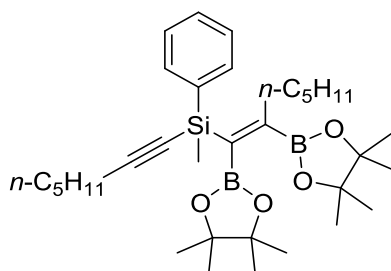

**(Z)-(1,2-bis(4,4,5,5-tetramethyl-1,3,2-dioxaborolan-2-yl)hept-1-en-1-yl)(hept-1-yn-1-yl)(methyl)(phenyl)silane (3n)**, Colorless oil, Yield: 70%. <sup>1</sup>H NMR (400 MHz, CDCl<sub>3</sub>) δ 7.63 (dd, *J* = 6.5, 3.2 Hz, 2H), 7.22 (d, *J* = 2.7 Hz, 2H), 7.21 (d, *J* = 1.3 Hz, 1H), 2.35 (t, *J* = 8.0 Hz, 2H), 2.15 (t, *J* = 7.1 Hz, 2H), 1.45 (p, *J* = 7.0 Hz, 2H), 1.33-1.01 (m, 34H), 0.81 (t, *J* = 7.1 Hz, 3H), 0.71 (t, *J* = 7.0 Hz, 3H), 0.46 (s, 3H). <sup>13</sup>C NMR (101 MHz, CDCl<sub>3</sub>) δ 137.4, 134.1, 128.2, 126.8, 108.9, 83.0, 82.7, 82.0, 38.6, 31.5, 30.5, 28.5, 27.6, 24.8, 24.8, 24.2, 24.2, 21.94, 21.6, 19.5, 13.4, 0.0. HRMS (ESI): *m/z*: [M + Na]<sup>+</sup> calculated for C<sub>33</sub>H<sub>54</sub>B<sub>2</sub>NaO<sub>4</sub>Si: 587.3882, Found: 587.3895.

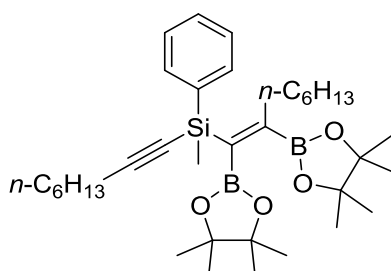

**(Z)-(1,2-bis(4,4,5,5-tetramethyl-1,3,2-dioxaborolan-2-yl)oct-1-en-1-yl)(methyl)(oct-1-yn-1-yl)(phenyl)silane (3o)**, Colorless oil, Yield: 84%. <sup>1</sup>H NMR (400 MHz, CDCl<sub>3</sub>) δ 7.62 (dd, *J* = 6.5, 3.1 Hz, 2H), 7.22 (d, *J* = 2.5 Hz, 2H), 7.21 (d, *J* = 1.3 Hz, 1H), 2.34 (t, *J* = 7.8 Hz, 2H), 2.16 (t, *J* = 7.1 Hz, 2H), 1.49-1.39 (m, 2H), 1.36-1.27 (m, 2H), 1.25-1.06 (m, 32H), 0.81 (t, *J* = 6.9 Hz, 3H), 0.75 (t, *J* = 7.2 Hz, 3H), 0.46 (s, 3H). <sup>13</sup>C NMR (101 MHz, CDCl<sub>3</sub>) δ 137.4, 134.1, 128.2, 126.8, 108.9, 83.0, 82.7, 82.0, 38.7, 31.2, 30.7, 29.0, 28.8, 28.0, 27.9, 24.8, 24.8, 24.2, 24.2, 22.0, 21.9, 19.6, 13.5, 13.4, 0.0. MS (EI) *m/z*: 592, 577, 535, 507, 478, 422, 338.

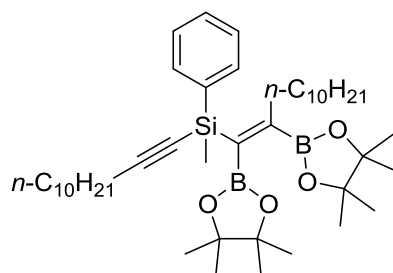

**(Z)-(1,2-bis(4,4,5,5-tetramethyl-1,3,2-dioxaborolan-2-yl)dodec-1-en-1-yl)(dodec-1-yn-1-yl)(methyl)(phenyl)silane (3p)**, Colorless oil, Yield: 88%.  $^1\text{H}$  NMR (400 MHz,  $\text{CDCl}_3$ )  $\delta$  7.62 (dd,  $J = 6.3, 3.1$  Hz, 2H), 7.23 (d,  $J = 2.4$  Hz, 2H), 7.22 (d,  $J = 1.4$  Hz, 1H), 2.33 (t,  $J = 8.2$  Hz, 2H), 2.16 (t,  $J = 7.1$  Hz, 2H), 1.51-1.39 (m, 2H), 1.36-1.27 (m, 2H), 1.24-1.02 (m, 56H), 0.81 (t,  $J = 6.8$  Hz, 6H), 0.46 (s, 3H).  $^{13}\text{C}$  NMR (101 MHz,  $\text{CDCl}_3$ )  $\delta$  137.6, 134.1, 128.1, 126.8, 108.9, 83.0, 82.7, 82.1, 38.7, 31.3, 29.4, 29.0, 29.0, 28.9, 28.85, 28.75, 28.7, 28.6, 28.3, 27.9, 24.82, 24.75, 24.2, 24.2, 22.1, 19.6, 13.5, 0.0.

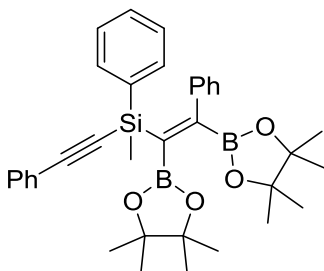

**(Z)-methyl(phenyl)(2-phenyl-1,2-bis(4,4,5,5-tetramethyl-1,3,2-dioxaborolan-2-yl)vinyl)(phenylethynyl)silane (3q)**, Colorless oil, Yield: 43%.  $^1\text{H}$  NMR (400 MHz,  $\text{CDCl}_3$ )  $\delta$  7.72 (d,  $J = 5.5$  Hz, 2H), 7.39 (t,  $J = 6.0, 1.2$  Hz, 2H), 7.25-7.15 (m, 11H), 0.96 (s, 6H), 0.93 (s, 6H), 0.79 (s, 12H), -0.07 (s, 3H).  $^{13}\text{C}$  NMR (101 MHz,  $\text{CDCl}_3$ )  $\delta$  145.6, 137.0, 134.1, 131.3, 128.2, 127.6, 127.3, 127.0, 126.85, 126.77, 125.7, 122.9, 105.9, 93.4, 83.1, 82.7, 24.3, 24.2, 24.0, 23.8, -0.7. HRMS (ESI):  $m/z$ :  $[\text{M} + \text{Na}]^+$  calculated for  $\text{C}_{35}\text{H}_{42}\text{B}_2\text{NaO}_4\text{Si}$ : 599.2943, Found: 599.2955.



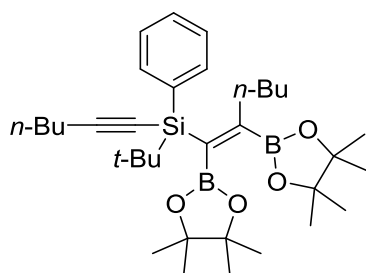

**(Z)-(1,2-bis(4,4,5,5-tetramethyl-1,3,2-dioxaborolan-2-yl)hex-1-en-1-yl)(tert-butyl)(hex-1-yn-1-yl)(phenyl)silane (3r)**, Colorless oil, Yield: 55%.  $^1\text{H}$  NMR (400 MHz,  $\text{CDCl}_3$ )  $\delta$  7.77 (dd,  $J = 6.7, 2.5$  Hz, 2H), 7.27 (d,  $J = 1.9$  Hz, 2H), 7.26 (d,  $J = 2.3$  Hz, 1H), 2.51-2.32 (m, 2H), 2.24 (t,  $J = 6.9$  Hz, 2H), 1.57-1.46 (m, 2H), 1.46-1.36 (m, 2H), 1.27 (s, 12H), 1.26 (s, 6H), 1.19 (s, 6H), 1.14 (s, 9H), 1.06-0.94 (m, 4H), 0.89 (t,  $J = 7.2$  Hz, 3H), 0.67 (t,  $J = 6.9$  Hz, 3H).  $^{13}\text{C}$  NMR (101 MHz,  $\text{CDCl}_3$ )  $\delta$  137.4, 135.8, 128.4, 127.0, 109.4, 83.5, 83.3, 82.7, 43.8, 40.2, 31.3, 30.7, 27.9, 26.2, 25.6, 25.2, 25.0, 24.9, 23.0, 22.0, 19.9, 19.1, 13.6. HRMS (ESI):  $m/z$ :  $[\text{M} + \text{Na}]^+$  calculated for  $\text{C}_{34}\text{H}_{56}\text{B}_2\text{NaO}_4\text{Si}$ : 601.4038, Found: 601.4025.

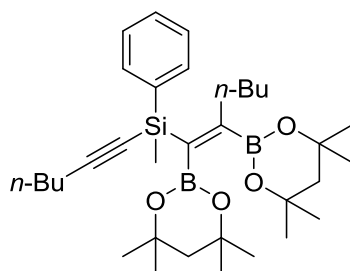

**(Z)-(1,2-bis(4,4,6,6-tetramethyl-1,3,2-dioxaborinan-2-yl)hex-1-en-1-yl)(hex-1-yn-1-yl)(methyl)(phenyl)silane (3s)**, Colorless oil, Yield: 65%.  $^1\text{H}$  NMR (400 MHz,  $\text{CDCl}_3$ )  $\delta$  7.73 (t,  $J = 3.6, 1.2$  Hz, 2H), 7.31-7.28 (m, 3H), 2.38 (d,  $J = 7.7$  Hz, 2H), 2.24 (t,  $J = 7.0$  Hz, 2H), 1.78 (s, 2H), 1.71 (s, 2H), 1.60-1.47 (m, 2H), 1.46-1.37 (m, 2H), 1.34 (s, 12H), 1.33 (s, 6H), 1.30 (s, 6H), 1.22-1.07 (m, 4H), 0.90 (t,  $J = 7.3$  Hz, 3H), 0.75 (t,  $J = 7.1$  Hz, 3H), 0.51 (s, 3H).  $^{13}\text{C}$  NMR (101 MHz,  $\text{CDCl}_3$ )  $\delta$  137.2, 132.6, 126.4, 125.1, 68.5, 68.4, 46.9, 46.1, 36.7, 29.8, 29.7, 29.7, 29.6, 28.5, 21.0, 19.9, 17.8, 11.8, 11.5, -1.2. MS (EI)  $m/z$ : 564, 549, 521, 492, 394, 296, 77.

## Reference

- [1]. L. T. Kilman, S. N. Mlynarski, J. P. Morken, *J. Am. Chem. Soc.* **2009**, 131, 13210-13211.
- [2]. L. Sergiusz, S. Janusz, *J. Org. Chem.* **2003**, 68, 9384-9388.
- [3]. F. Li, Z-J. Zheng, L-W. Xu, *Chem. Asian J.* **2012**, 7, 2008–2013.
- [4]. L-S. Zheng, L. Li, K-F. Yang, Z-J. Zheng, X-Q. Xiao, L-W. Xu, *Tetrahedron.* **2013**, 69, 8777-8784.

**Table S1. Screening of phosphine ligands for Pt(0)-catalyzed diboration of di(hex-1-yn-1-yl)(methyl)(phenyl)silane (**1a**) with bis(pinacolato)diboron (**2a**) in Toluene.<sup>[a]</sup>**

| Entry     | Ligand of Scheme S1                             | <b>3a/4a</b> | Yield(%) <sup>[b]</sup> | Z/E <sup>[c]</sup> |
|-----------|-------------------------------------------------|--------------|-------------------------|--------------------|
| 1         | <b>XantPhos</b>                                 | -            | n.r                     | -                  |
| 2         | <b>RuPhos</b>                                   | -            | n.r                     | -                  |
| 3         | <b><i>t</i>-Bu<sub>3</sub>P HBF<sub>4</sub></b> | -            | n.r                     | -                  |
| 4         | <b>JohnPhos</b>                                 | -            | n.r                     | -                  |
| 5         | <b>XPhos</b>                                    | -            | n.r                     | -                  |
| 6         | <b>DPEPhos</b>                                  | -            | n.r                     | -                  |
| 7         | <b>Cy<sub>3</sub>P HBF<sub>4</sub></b>          | -            | n.r                     | -                  |
| 8         | <b>SPhos</b>                                    | -            | n.r                     | -                  |
| 9         | <b>PPh<sub>3</sub></b>                          | >99:1        | 78                      | 97/3               |
| 10        | <b>L1</b>                                       | -            | n.r                     | -                  |
| 11        | <b>L2</b>                                       | >99:1        | 72                      | 98/2               |
| <b>12</b> | <b>L3</b>                                       | >99:1        | <b>83</b>               | <b>99/1</b>        |

<sup>[a]</sup>Unless otherwise noted, the reaction conditions were as follows: Di(hex-1-yn-1-yl)(methyl)(phenyl)silane **1a** (0.1 mmol), Bis(pinacolato)diboron **2a** (0.12 mmol), Platinum complex (3 mol %), Ligand shown in Scheme S1(3 mol %), Solvent (1 mL). Reaction time is 20 hours for every case. n.r. is no reaction. <sup>[b]</sup>The yield was determined by GC. <sup>[c]</sup>Determined by GC.

**Scheme S1. The ligands evaluated in Pt(0)-catalyzed diboration of di(hex-1-yn-1-yl)(methyl)(phenyl)silane (1a) with bis(pin-acolato)diboron (2a).**

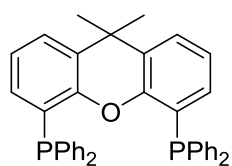

**XantPhos**

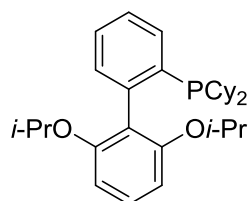

**RuPhos**

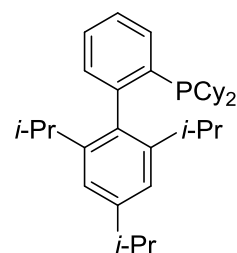

**XPhos**

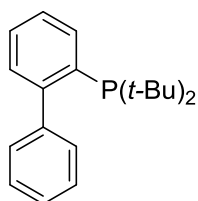

**JohnPhos**

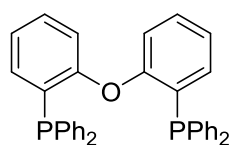

**DPEPhos**

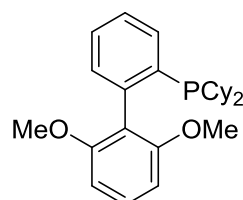

**SPhos**

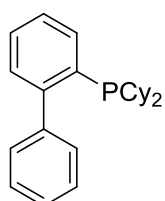

**L1**

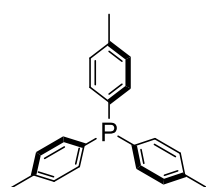

**L2**

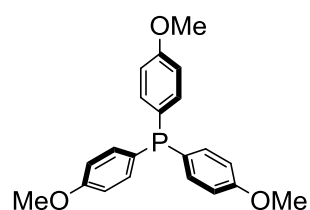

**L3**

**Table S2. Screening of Solvent for Pt(0)-catalyzed diboration of di(hex-1-yn-1-yl)(methyl)(phenyl)silane (**1a**) with Bis(pi-nacolato)di boron (**2a**) in toluene.<sup>[a]</sup>**

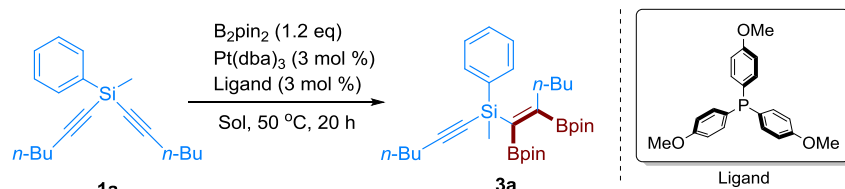

| Entry | Solvent            | Yield(%) <sup>[b]</sup> | Z/E <sup>[c]</sup> |
|-------|--------------------|-------------------------|--------------------|
| 1     | EA                 | 63                      | 99/1               |
| 2     | DCM                | n.r                     | -                  |
| 3     | THF                | 32                      | 99/1               |
| 4     | Et <sub>2</sub> O  | n.r                     | -                  |
| 6     | DME                | 43                      | 99/1               |
| 7     | CH <sub>3</sub> CN | trace                   | -                  |
| 8     | EtOH               | n.r                     | -                  |
| 9     | Hex                | n.r                     | -                  |

<sup>[a]</sup>Unless otherwise noted, the reaction conditions were as follows: Di(hex-1-yn-1-yl)(methyl)(phenyl)silane **1a** (0.1 mmol), Bis(pinacolato)diboron **2a** (0.12 mmol), Platinum complex (3 mol %), Ligand (3 mol %), Solvent (1 mL). Reaction time is 20 hours for every case. n.r. is no reaction. <sup>[b]</sup>The yield was determined by GC. <sup>[c]</sup>Determined by GC.

**Table S3. Screening of catalysts for Pt(0)-catalyzed diboration of di(hex-1-yn-1-yl)(methyl)(phenyl)silane (**1a**) with bis(pi-nacolato)diboron (**2a**) in toluene.<sup>[a]</sup>**

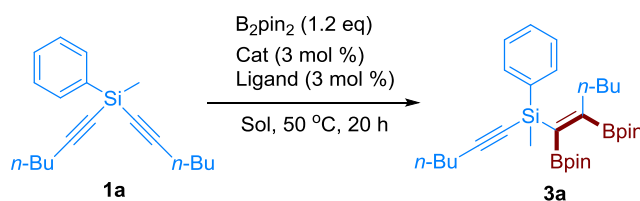

| Entry | Metal salt                                                          | Ligand              | Solvent | Yield (%) <sup>[b]</sup> | Z/E <sup>[c]</sup> |
|-------|---------------------------------------------------------------------|---------------------|---------|--------------------------|--------------------|
| 1     | CuCl (10 mol %)                                                     | XantPhos (10 mol %) | MeOH    | n.r                      | -                  |
| 2     | CuCl (10 mol %)                                                     | DPPP (10 mol %)     | EtOH    | n.r                      | -                  |
| 3     | CuCl (10 mol %)                                                     | DPPP (10 mol %)     | Tol     | n.r                      | -                  |
| 4     | Cu(OAc) <sub>2</sub> (10 mol %)                                     | PCy <sub>3</sub>    | Tol     | n.r                      | -                  |
| 5     | Pt <sub>2</sub> (dba) <sub>3</sub> (3 mol %)                        | PPh <sub>3</sub>    | Tol     | 75                       | 90/10              |
| 6     | Pt(dba) <sub>3</sub> (3 mol %)                                      | PPh <sub>3</sub>    | Tol     | 78                       | 97/3               |
| 7     | [Rh(COD)Cl] <sub>2</sub>                                            | PPh <sub>3</sub>    | Tol     | n.r                      | -                  |
| 8     | Pd <sub>2</sub> (dba) <sub>3</sub>                                  | PPh <sub>3</sub>    | Tol     | n.r                      | -                  |
| 9     | [Pd(η <sup>3</sup> -C <sub>3</sub> H <sub>5</sub> )Cl] <sub>2</sub> | PPh <sub>3</sub>    | Tol     | n.r                      | -                  |
| 10    | [Ir(COD)Cl] <sub>2</sub>                                            | PPh <sub>3</sub>    | Tol     | n.r                      | -                  |
| 11    | [Ru( <i>p</i> -cymene)Cl] <sub>2</sub>                              | PPh <sub>3</sub>    | Tol     | n.r                      | -                  |

<sup>[a]</sup>Unless otherwise noted, the reaction conditions were as follows:

Di(hex-1-yn-1-yl)(methyl)(phenyl)silane **1a** (0.1 mmol), Bis(pinacolato)diboron **2a** (0.12 mmol), catalysts (3 mol %), Ligand (3 mol %), Solvent (1 mL). Reaction time is 20 hours for every case.

n.r. is no reaction. <sup>[b]</sup>The yield was determined by GC. <sup>[c]</sup>Determined by GC.

**Table S4. Optimization for Pt(0)-catalyzed diboration of di-(hex-1-yn-1-yl)(methyl)(phenyl)silane (**1a**) with bis(pi-nacola-to)diboron (**2a**) in toluene.<sup>[a]</sup>**

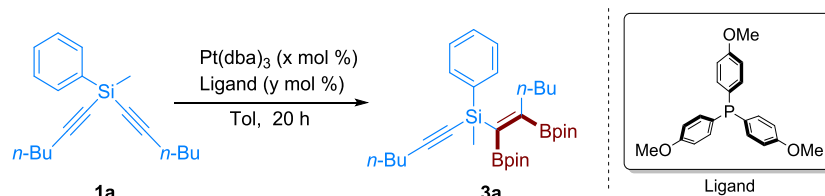

| Entry | x/y     | Concentration(M) | T (°C) | Yield of <b>5a</b> (%) <sup>[b]</sup> | Z/E <sup>[c]</sup> |
|-------|---------|------------------|--------|---------------------------------------|--------------------|
| 1     | 3/3     | 0.1              | 60     | 73                                    | 99/1               |
| 2     | 3/3     | 0.1              | 80     | 91                                    | 98/2               |
| 3     | 3/3     | 0.1              | 100    | 90                                    | 97/3               |
| 4     | 3/3     | 0.5              | 80     | 93                                    | 97/3               |
| 5     | 3/3     | 1                | 80     | 55                                    | 97/3               |
| 6     | 3/3     | 0.05             | 80     | 90                                    | 97/3               |
| 7     | 2/2     | 0.5              | 80     | 95(88) <sup>[d]</sup>                 | >99/1              |
| 8     | 1/1     | 0.5              | 80     | 88                                    | >99/1              |
| 9     | 0.5/0.5 | 0.5              | 80     | 70                                    | 97/3               |

<sup>[a]</sup>Unless otherwise noted, the reaction conditions were as follows:

Di(hex-1-yn-1-yl)(methyl)(phenyl)silane **1a** (0.1 mmol), Bis(pinacolato)diboron **2a** (0.12 mmol), Reaction time is 20 hours for every case. n.r. is no reaction. <sup>[b]</sup>The yield was determined by GC.

<sup>[c]</sup>Determined by GC. <sup>[d]</sup>The isolated yield in brackets.

**Table S5. Screening of chiral ligands for Pt(0)-catalyzed diboration of di(hex-1-yn-1-yl)(methyl)(phenyl)silane (**1a**) with bis(pinacolato)diboron (**2a**) in toluene.<sup>[a]</sup>**

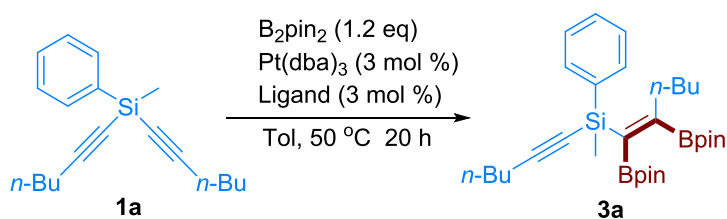

| Entry | Ligand of Scheme S2      | Yield (%) <sup>[b]</sup> | er (%) <sup>[c]</sup> | Z/E <sup>[d]</sup> |
|-------|--------------------------|--------------------------|-----------------------|--------------------|
| 1     | <b>(R)-FeiPhos</b>       | -                        | -                     |                    |
| 2     | <b>(R)-DTBM-SegPhos</b>  | -                        | -                     |                    |
| 3     | <b>(S)-DIOP</b>          | -                        | -                     |                    |
| 4     | <b>(S)-BINAP</b>         | -                        | -                     |                    |
| 5     | <b>(2S, 5S)-MeDuPhos</b> | -                        | -                     |                    |
| 6     | <b>(R)-DIPAMP</b>        | -                        | -                     |                    |
| 7     | <b>(R)-BDPP</b>          | -                        | -                     |                    |
| 8     | <b>L1</b>                | -                        | -                     |                    |
| 9     | <b>L2</b>                | -                        | -                     |                    |
| 10    | <b>L3</b>                | -                        | -                     |                    |
| 11    | <b>L4</b>                | 57                       | 50/50                 | 95/5               |
| 12    | <b>L5</b>                | -                        | -                     |                    |
| 13    | <b>L6</b>                | -                        | -                     |                    |
| 14    | <b>L7</b>                | -                        | -                     |                    |
| 15    | <b>L8</b>                | -                        | -                     |                    |
| 16    | <b>L9</b>                | -                        | -                     |                    |
| 17    | <b>L10</b>               | -                        | -                     |                    |

<sup>[a]</sup>Unless otherwise noted, the reaction conditions were as follows: Di(hex-1-yn-1-yl)(methyl)(phenyl)silane **1a** (0.1 mmol), Bis(pinacolato)diboron **2a** (0.12 mmol), Platinum complex (3 mol %), Ligand shown in Scheme S2 (3 mol %), Toluene (1 mL). Reaction time is 20 hours for every case. <sup>[b]</sup>The yield was determined by GC. <sup>[c]</sup>Determined by HPLC. <sup>[d]</sup>Determined by GC.



**Scheme S2. The chiral ligands evaluated in Pt(0)-catalyzed diboration of di(hex-1-yn-1-yl)(methyl)(phenyl)silane (1a) with bis(pinacolato)diboron (2a).**

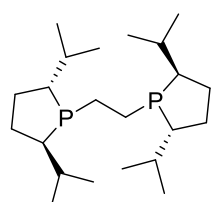

**L1** (*R, R*)

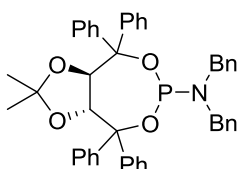

**L2** (*R, R*)

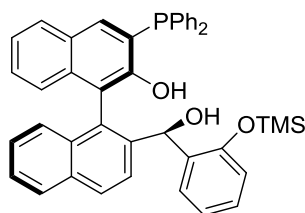

**L3** (*R, S*)

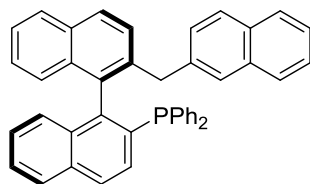

**L4** (*R*)

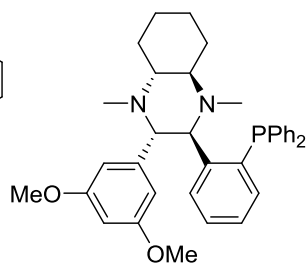

**L5** (*R, R*)

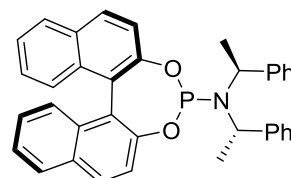

**L6** (*R, S, S*)

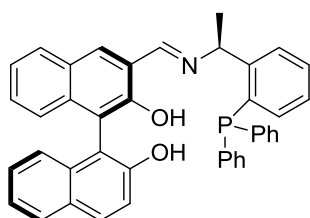

**L7** (*R, S*)

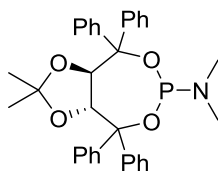

**L8** (*R, R*)

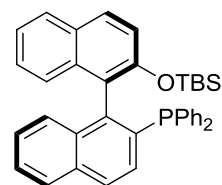

**L9** (*R*)

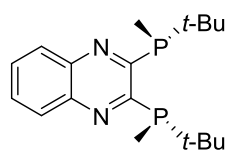

**L10**

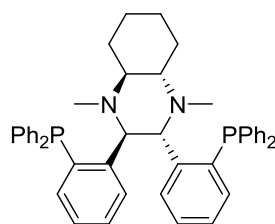

**(R)-FeiPhos**

**Table S6. Screening of chiral ligands for Pt(0)-catalyzed diboration of di(hex-1-yn-1-yl)(methyl)(phenyl)silane (**1a**) with bis(pinacolato)diboron (**2a**) in toluene.<sup>[a]</sup>**

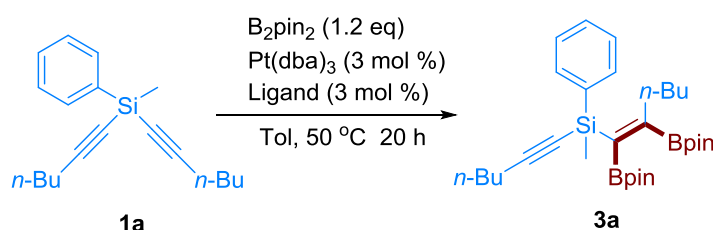

| Entry    | Ligand of Scheme S3 | Yield (%) <sup>[b]</sup> | er (%) <sup>[c]</sup> |              | Z/E <sup>[d]</sup> |
|----------|---------------------|--------------------------|-----------------------|--------------|--------------------|
|          |                     |                          | Z                     | E            |                    |
| 1        | <b>L1</b>           | n.r                      | -                     | -            | -                  |
| 2        | <b>L2</b>           | n.r                      | -                     | -            | -                  |
| 3        | <b>L3</b>           | n.r                      | -                     | -            | -                  |
| 4        | <b>L4</b>           | n.r                      | -                     | -            | -                  |
| 5        | <b>L5</b>           | n.r                      | -                     | -            | -                  |
| 6        | <b>L6</b>           | 66                       | 50/50                 | 53/47        | 93/7               |
| <b>7</b> | <b>L7</b>           | <b>73</b>                | <b>50/50</b>          | <b>66/34</b> | <b>68/32</b>       |
| 8        | <b>L8</b>           | 32                       | 55.5/44.5             | 64/36        | 84/16              |
| 9        | <b>L9</b>           | 20                       | 53/47                 | 56/44        | 91/9               |
| 10       | <b>L10</b>          | 76                       | 54/46                 | 61/39        | 94/6               |
| 11       | <b>L11</b>          | n.r                      | -                     | -            | -                  |
| 12       | <b>L12</b>          | 46                       | 50/50                 | 59/41        | 84/16              |
| 13       | <b>L13</b>          | n.r                      | -                     | -            | -                  |
| 14       | <b>L14</b>          | 42                       | 56/44                 | 42/58        | 88/12              |
| 15       | <b>L15</b>          | trace                    | -                     | -            | -                  |
| 16       | <b>L16</b>          | n.r                      | -                     | -            | -                  |

<sup>[a]</sup>Unless otherwise noted, the reaction conditions were as follows:

Di(hex-1-yn-1-yl)(methyl)(phenyl)silane **1a** (0.1 mmol), Bis(pinacolato)diboron **2a** (0.12 mmol), Platinum complex (3 mol %), Ligand shown in Scheme S3 (3 mol %), Toluene (1 mL). Reaction time is 20 hours for every case. n.r. is no reaction. <sup>[b]</sup>The yield was determined by GC.

<sup>[c]</sup>Determined by HPLC. <sup>[d]</sup>Determined by GC.

**Scheme S3. The chiral ligands evaluated in Pt(0)-catalyzed diboration of di(hex-1-yn-1-yl)(methyl)(phenyl)silane (1a) with bis(pin-acolato)diboron (2a).**

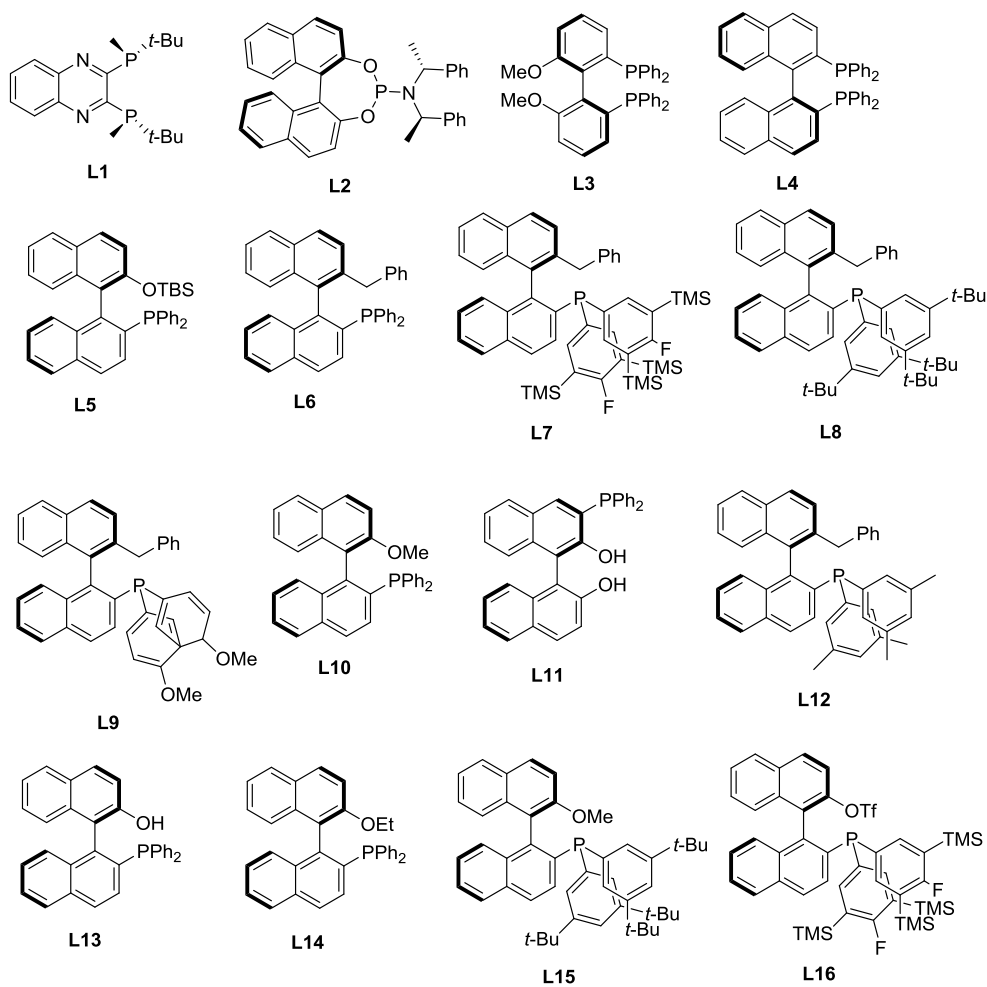

**Table S7. Screening of solvent for Pt(0)/L7-catalyzed diboration of di(hex-1-yn-1-yl)(methyl)(phenyl)silane (**1a**) with bis(pinacolato) diboron (**2a**) in toluene.<sup>[a]</sup>**

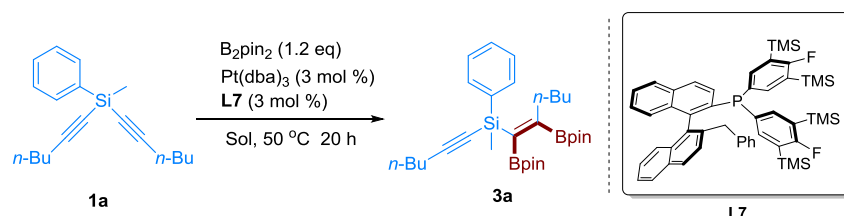

| Entry | Solvent                    | Yield (%) <sup>[b]</sup> | ee (%) <sup>[c]</sup> | Z/E <sup>[d]</sup> |
|-------|----------------------------|--------------------------|-----------------------|--------------------|
| 1     | THF                        | 45                       | race/38               | 66/34              |
| 2     | Et <sub>2</sub> O          | 92                       | race/38               | 59/41              |
| 2-2   | Et <sub>2</sub> O (rt)     | 82                       | 3/38                  | 55/45              |
| 2-3   | Et <sub>2</sub> O (-20 °C) | n.r                      | -                     | -                  |
| 3     | DCM                        | <5                       | -                     | -                  |
| 4     | DCE                        | n.r                      | -                     | -                  |
| 5     | Dioxane                    | 51                       | 4/35                  | 68/32              |
| 6     | EtOH                       | 22                       | -                     | 65/35              |
| 7     | MeCN                       | n.r                      | -                     | -                  |
| 8     | Hex                        | 90                       | race/37               | 63/37              |
| 9     | <i>i</i> -PrOH             | 67                       | 10/40                 | 73/27              |
| 10    | Hex/ <i>i</i> -PrOH (1:1)  | 82                       | race/40               | 68/32              |
| 11    | Cyclohexane                | 83                       | race/36               | 68/32              |
| 12    | MTBE                       | 93                       | race/38               | 60/40              |
| 13    | Benzene                    | 64                       | race/38               | 67/33              |
| 14    | PhCF <sub>3</sub>          | 43                       | 6/50                  | 65/35              |
| 15    | EA                         | 84                       | nd/42                 | 60/40              |
| 16    | Hexafluorobenzene          | 72                       | race/44               | 53/47              |
| 17    | 2,2-Difluoroethanol        | n.r                      | -                     | -                  |
| 18    | Octafluorotoluene          | 85                       | race/30               | 53/47              |
| 19    | Hexafluoroisopropanol      | n.r                      | -                     | -                  |
| 20    | 2,2,2-Trifluoroethanol     | n.r                      | -                     | -                  |
| 21    | DMF                        | n.r                      | -                     | -                  |

<sup>[a]</sup>Unless otherwise noted, the reaction conditions were as follows: Di(hex-1-yn-1-yl)(methyl)(phenyl)silane **1a** (0.1 mmol), Bis(pinacolato)diboron **2a** (0.12 mmol), Platinum complex (3 mol %), Ligand (3 mol %), Solvent (1 mL). Reaction time is 20 hours for every case. <sup>[b]</sup>The yield was determined by GC. <sup>[c]</sup>Determined by HPLC. <sup>[d]</sup>Determined by GC.

**Table S8. Screening of additives for Pt(0)/L7-catalyzed diboration of di(hex-1-yn-1-yl)(methyl)(phenyl)silane (**1a**) with Bis(pinacolato)diboron (**2a**) in toluene.<sup>[a]</sup>**

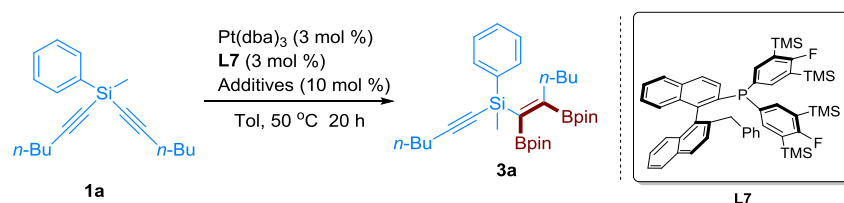

| Entry | Additives                                                 | Yield (%) <sup>[b]</sup> | ee (%) <sup>[c]</sup> | Z/E <sup>[d]</sup> |
|-------|-----------------------------------------------------------|--------------------------|-----------------------|--------------------|
| 1     | NaBAr <sub>4</sub><br>(Ar=3,5-Bis(trifluoromethyl)phenyl) | -                        | -                     | -                  |
| 2     | 2,2',4'-Trichloroacetophenone                             | 93                       | race/40               | 45/55              |
| 3     | NaPF <sub>6</sub>                                         | 40                       | race/35               | 31/69              |
| 4     | PhB(OH) <sub>2</sub>                                      | 95                       | race/47               | 44/56              |
| 5     | NaBF <sub>4</sub>                                         | 92                       | race/46               | 45/55              |
| 6     | NaF                                                       | 76                       | race/34               | 35/65              |
| 7     | NaOCCF <sub>3</sub>                                       | 71                       | race/34               | 35/65              |
| 8     | NaBH <sub>3</sub> CN                                      | -                        | -                     | -                  |
| 9     | tris(pentafluorophenyl)borane                             | -                        | -                     | -                  |
| 10    | Cu(BF <sub>4</sub> ) <sub>2</sub> · 6H <sub>2</sub> O     | -                        | -                     | -                  |

<sup>[a]</sup>Unless otherwise noted, the reaction conditions were as follows: Di(hex-1-yn-1-yl)(methyl)(phenyl)silane **1a** (0.1 mmol), Bis(pinacolato)diboron **2a** (0.12 mmol), Platinum complex (3 mol %), Ligand (3 mol %), Toluene (1 mL). Reaction time is 20 hours for every case. <sup>[b]</sup>The yield was determined by GC. <sup>[c]</sup>Determined by HPLC. <sup>[d]</sup>Determined by GC.

**Scheme S4. Substrate scope for Pt(0)-catalyzed diboration of Si-bisalkynes **1** with bis(pinacolato)diboron (**2a**).**

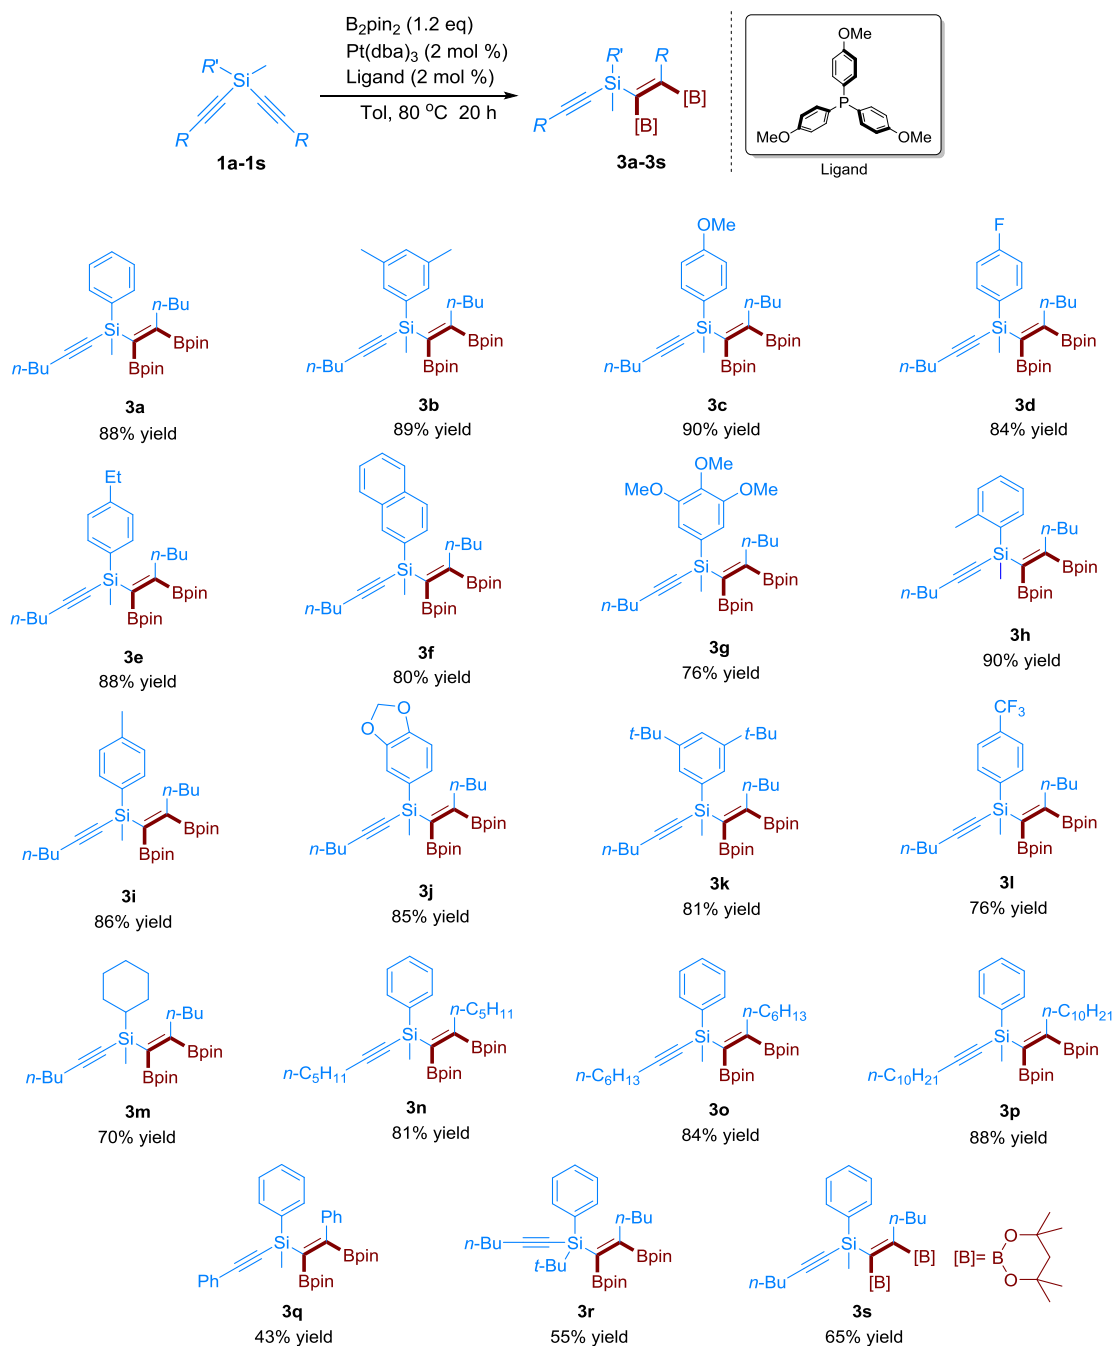

## The COSY and NOESY spectra of **3f**

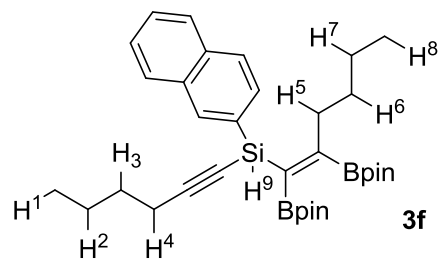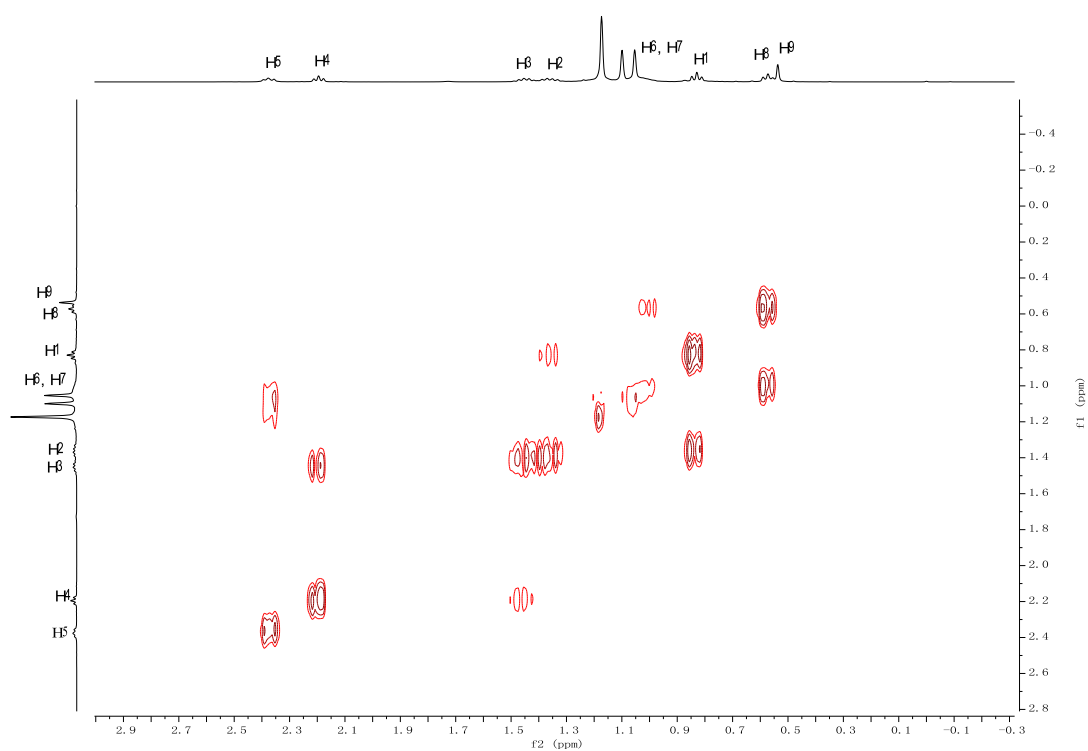

COSY spectra of **3f**

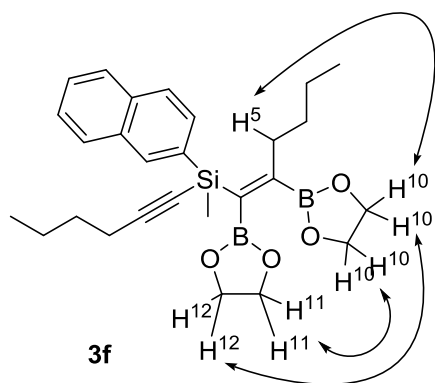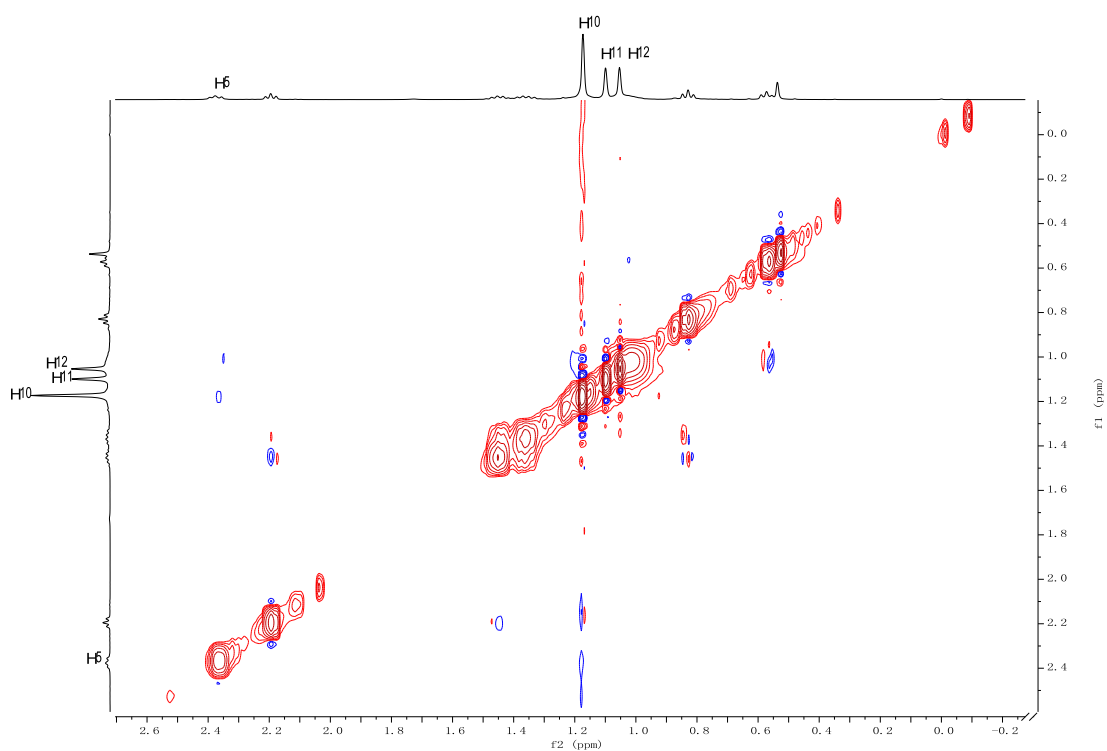

NOESY spectra of **3f**



# NMR Spectra

## $^1\text{H}$ NMR of L12

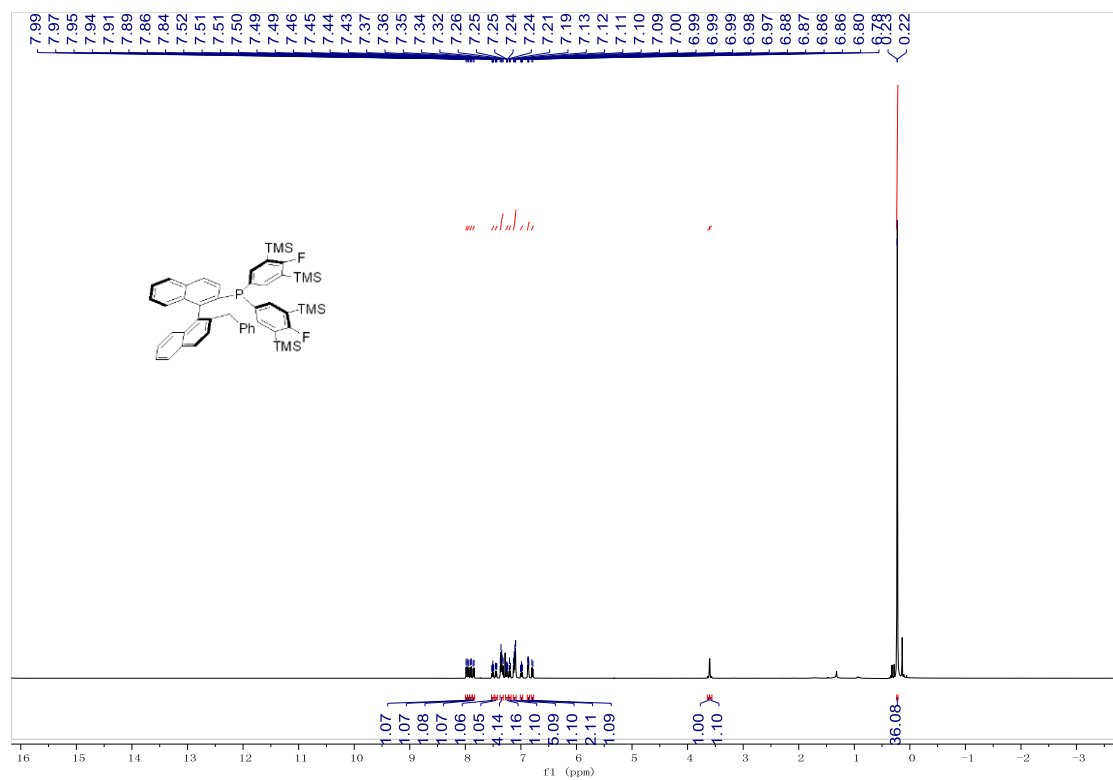

## $^{13}\text{C}$ NMR of L12

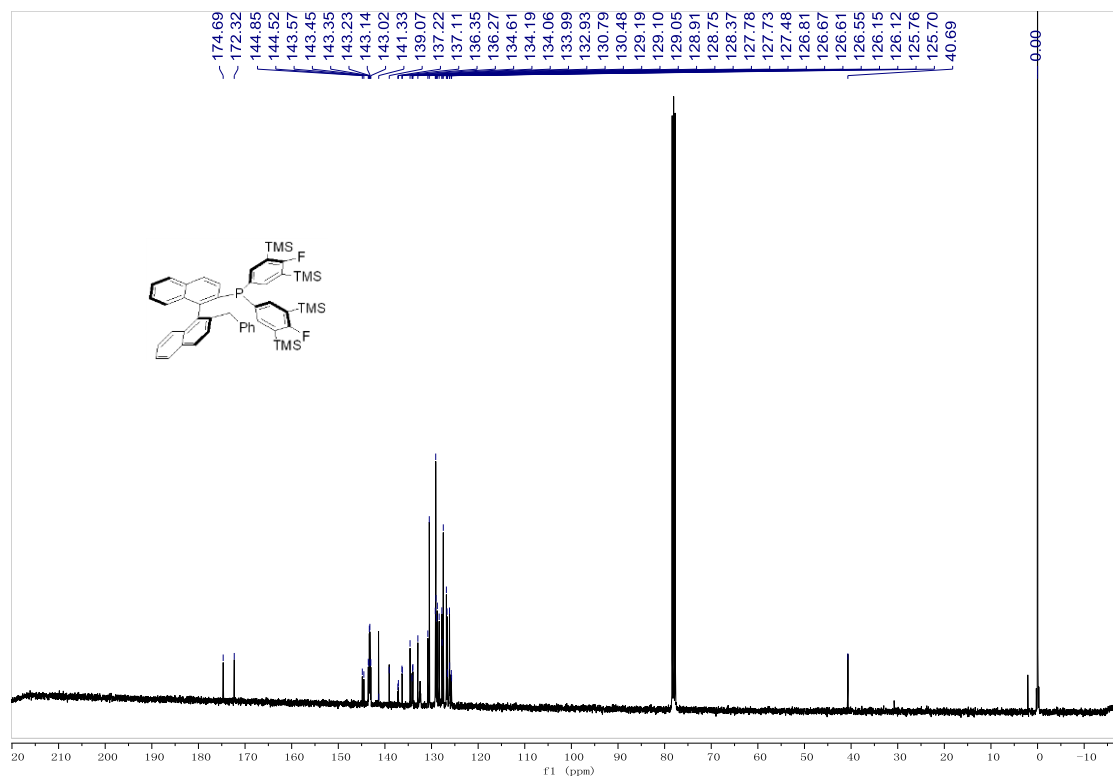

$^{29}\text{Si}$  NMR of L12

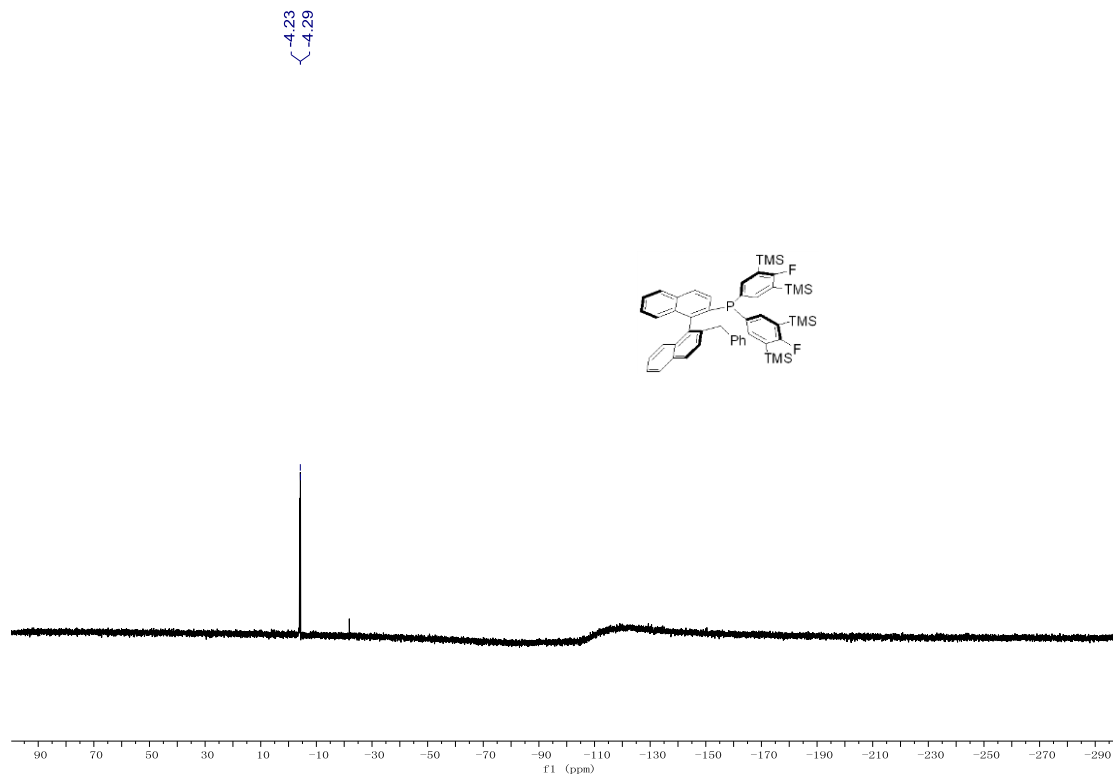

### $^{31}\text{P}$ NMR of L12

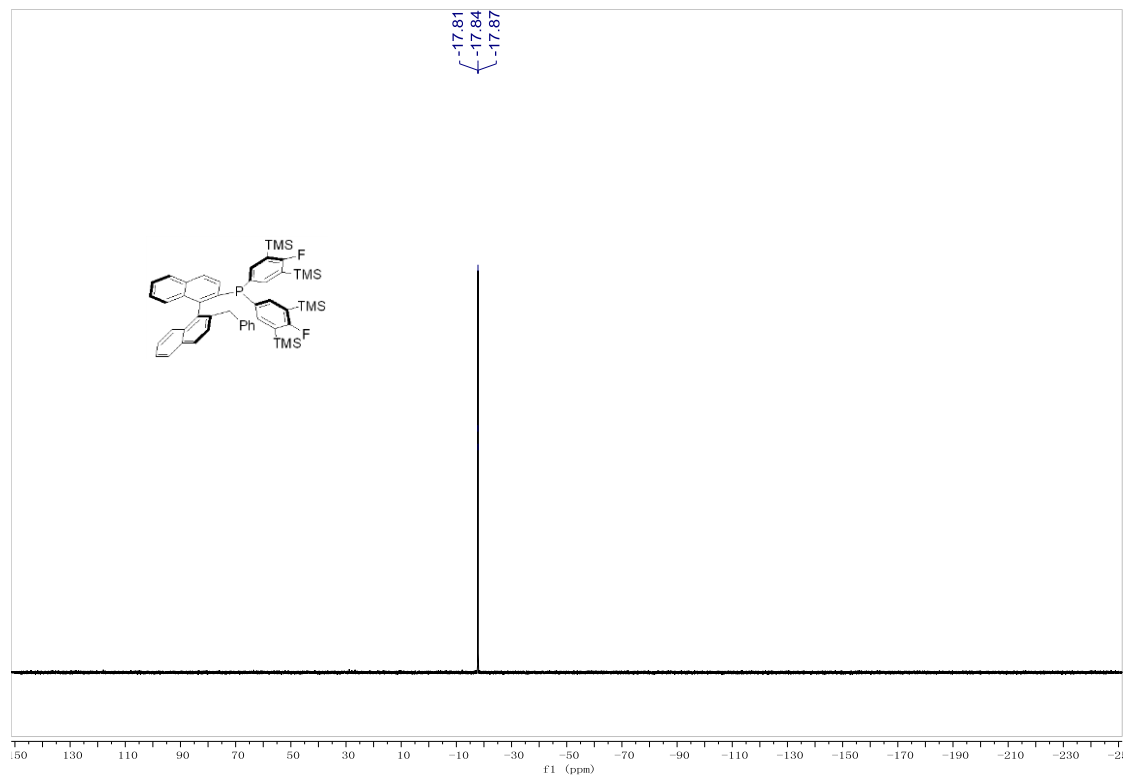

### $^{19}\text{F}$ NMR of L12

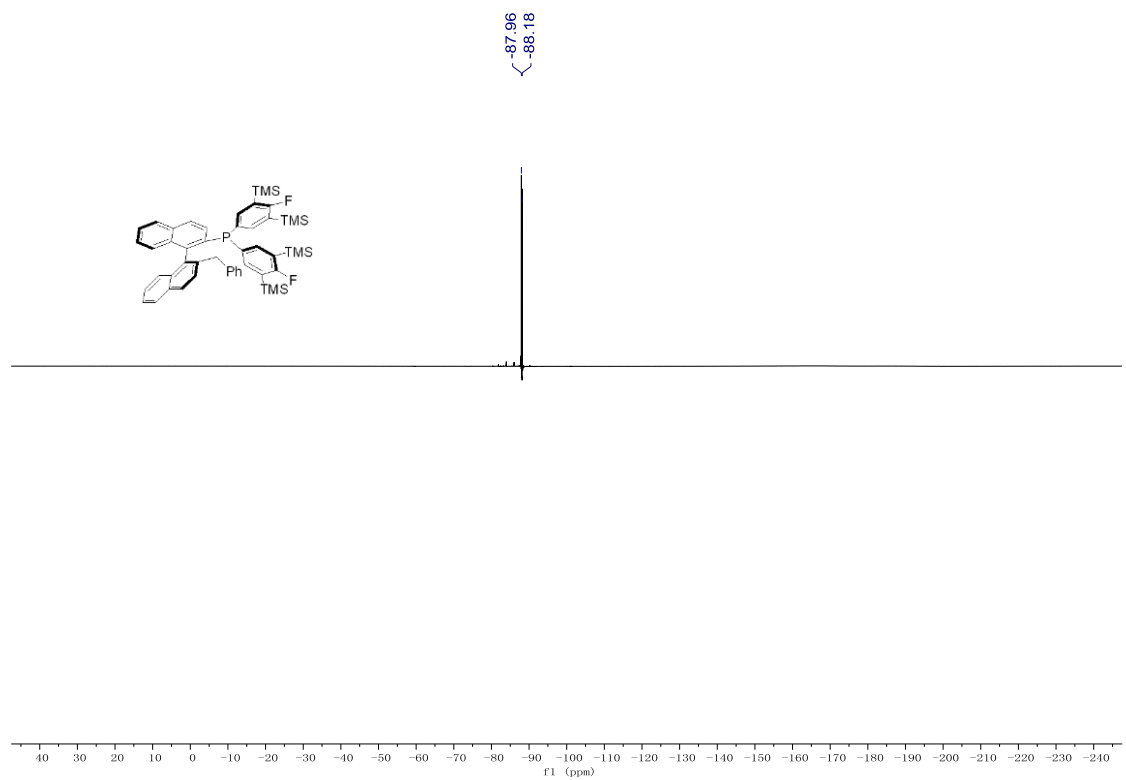

### $^1\text{H}$ NMR of **1a**

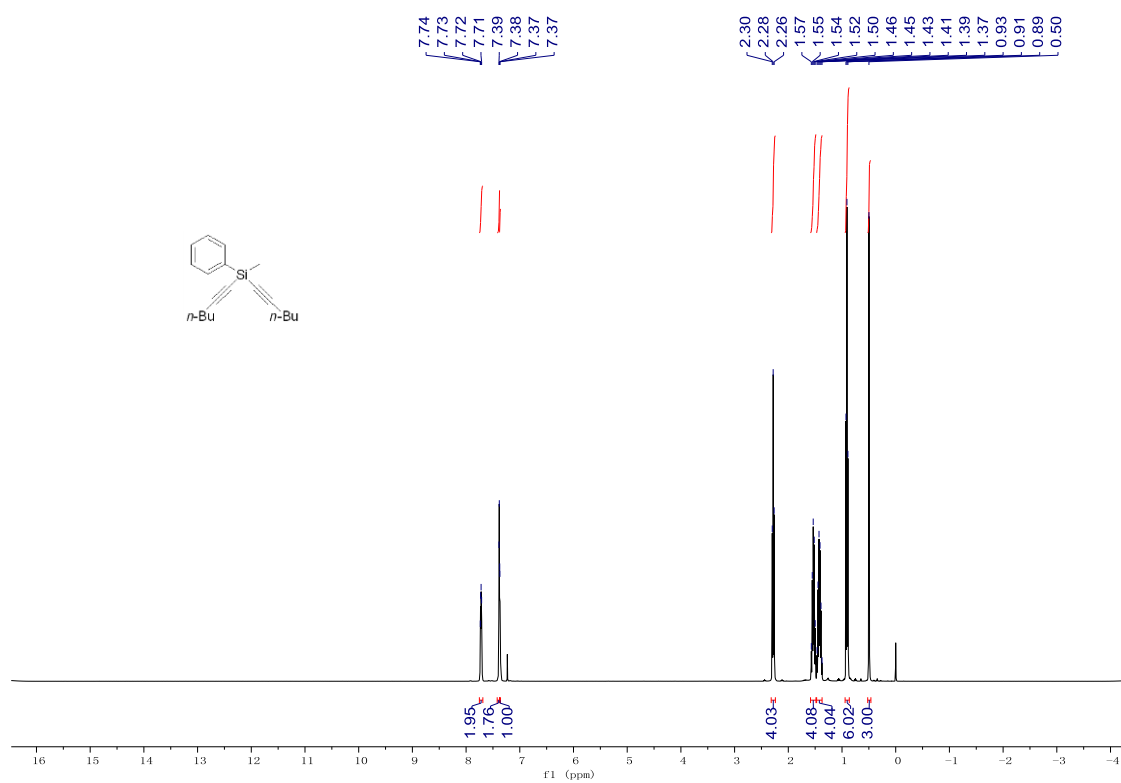

### $^{13}\text{C}$ NMR of **1a**

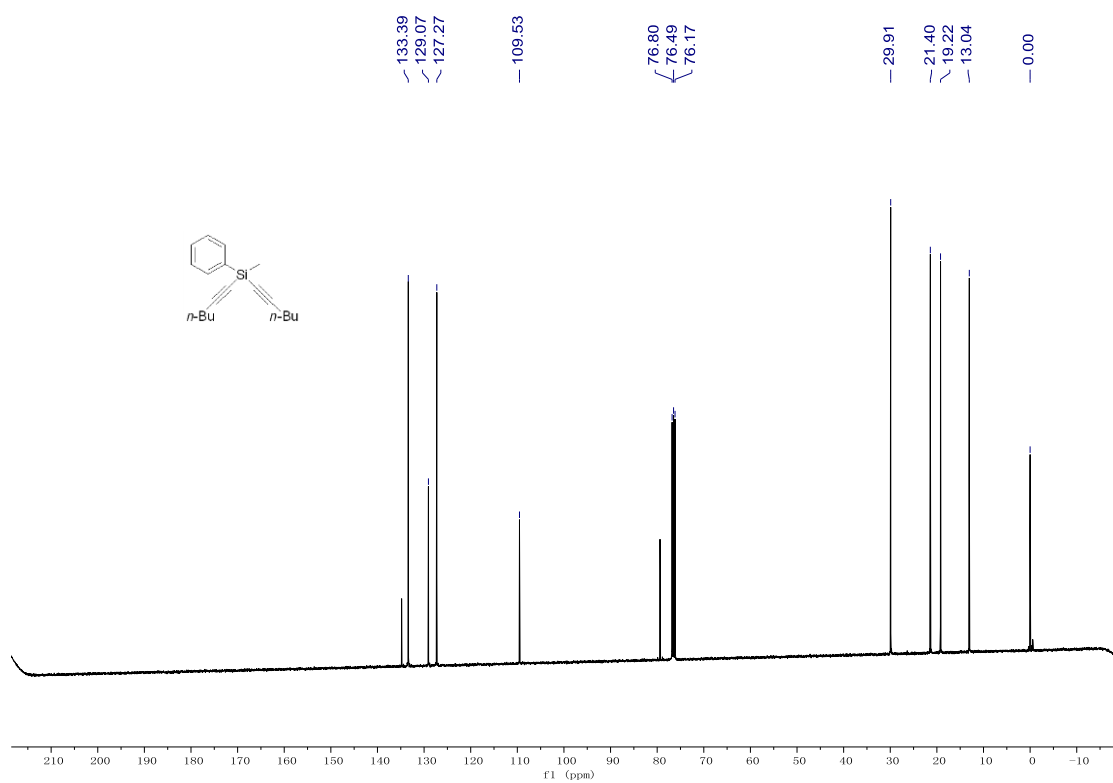

# <sup>1</sup>H NMR of **1b**

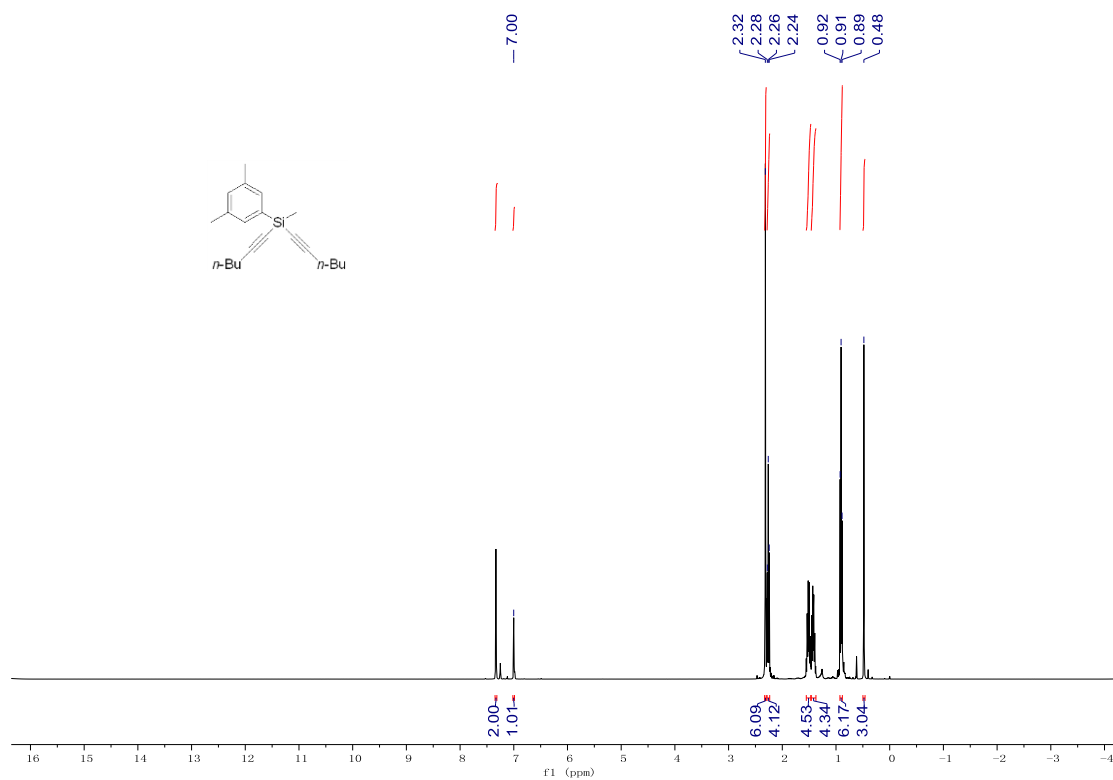

# <sup>13</sup>C NMR of **1b**

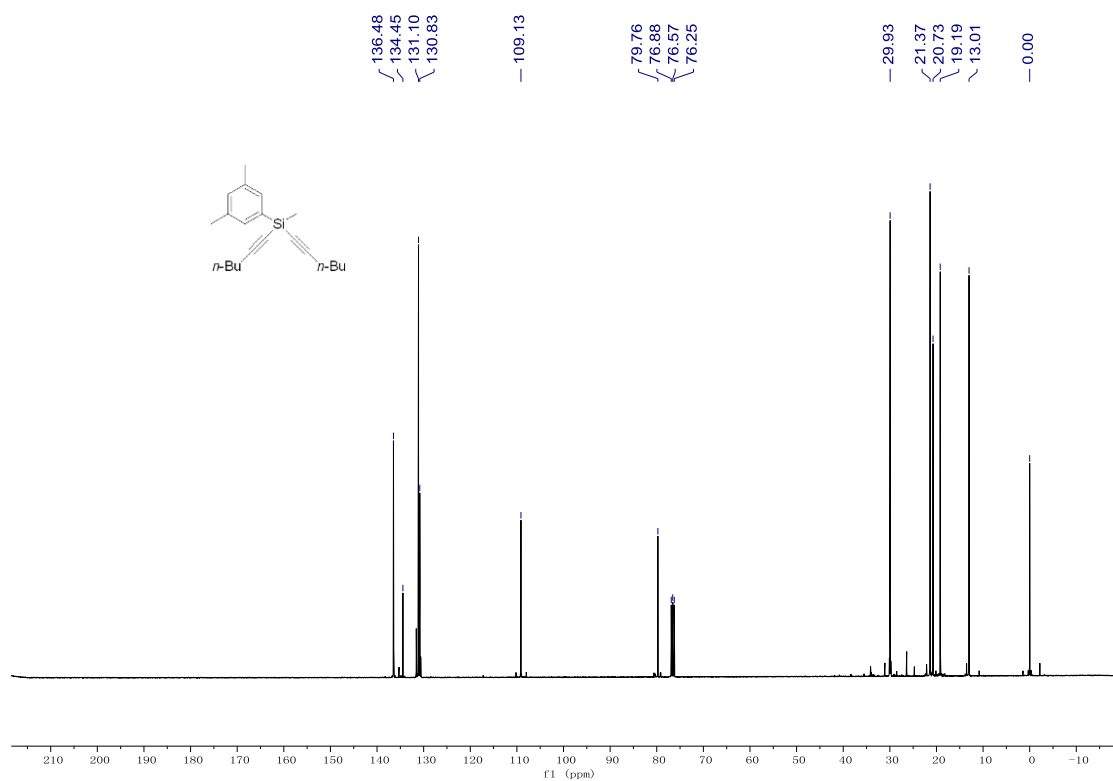

# $^1\text{H}$ NMR of **1c**

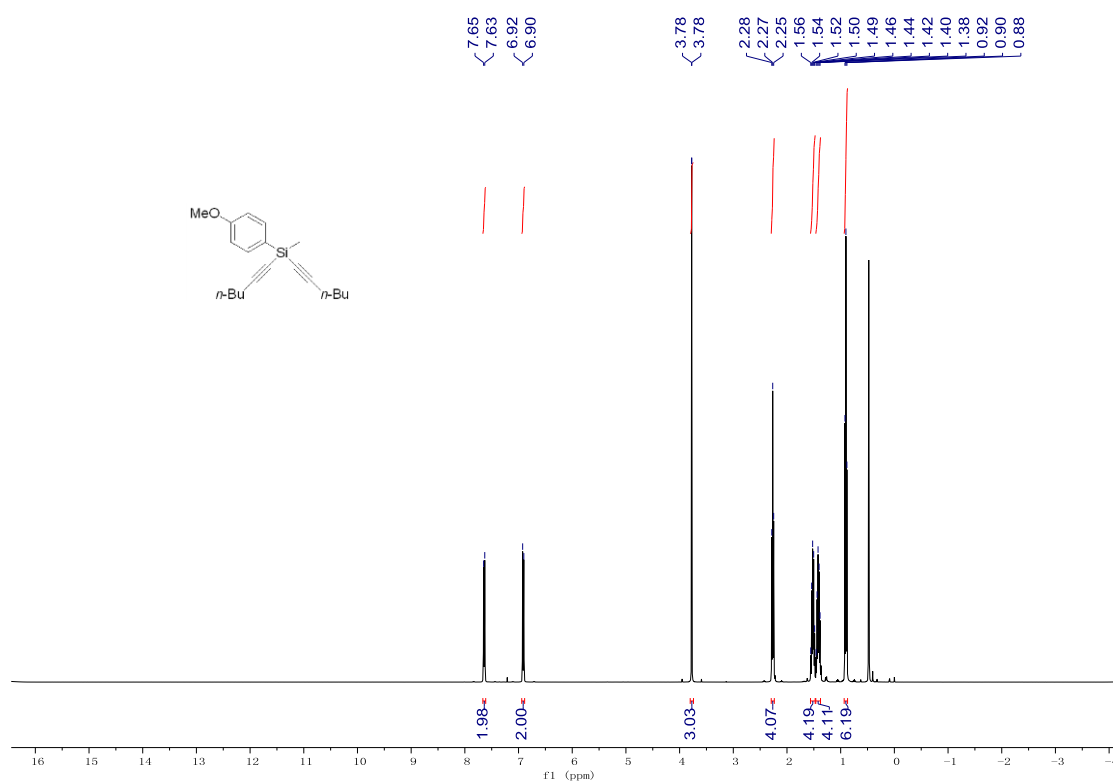

# $^{13}\text{C}$ NMR of **1c**

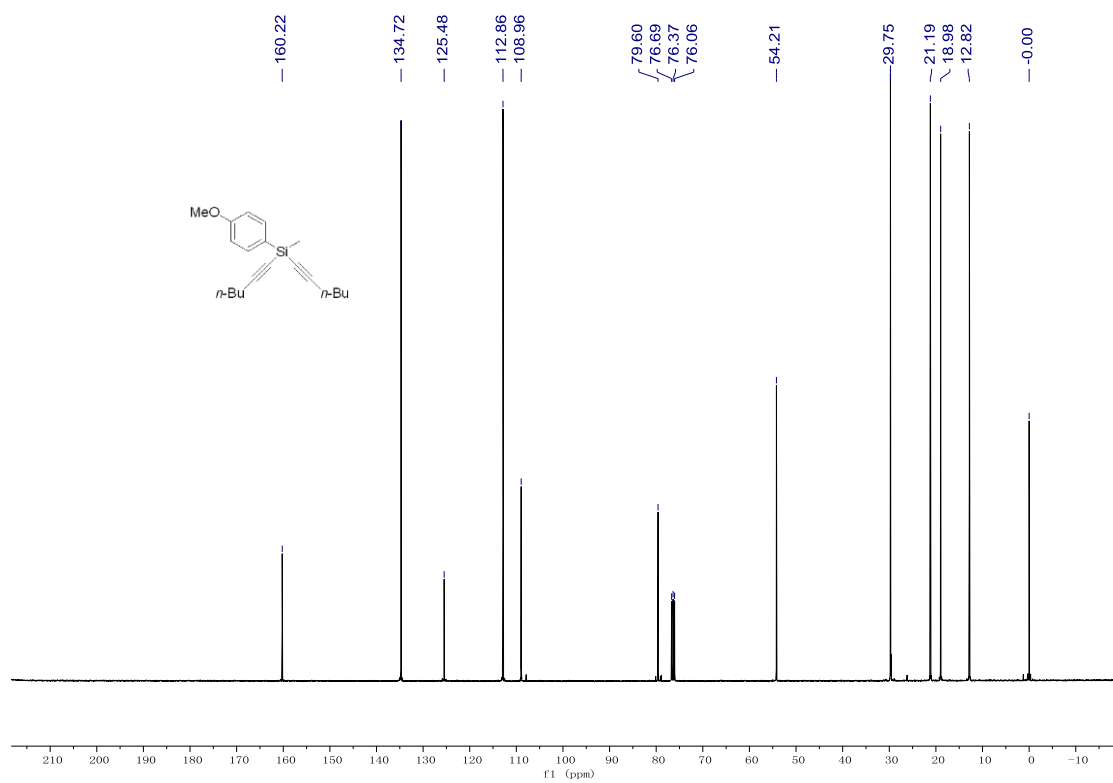

# $^1\text{H}$ NMR of **1d**

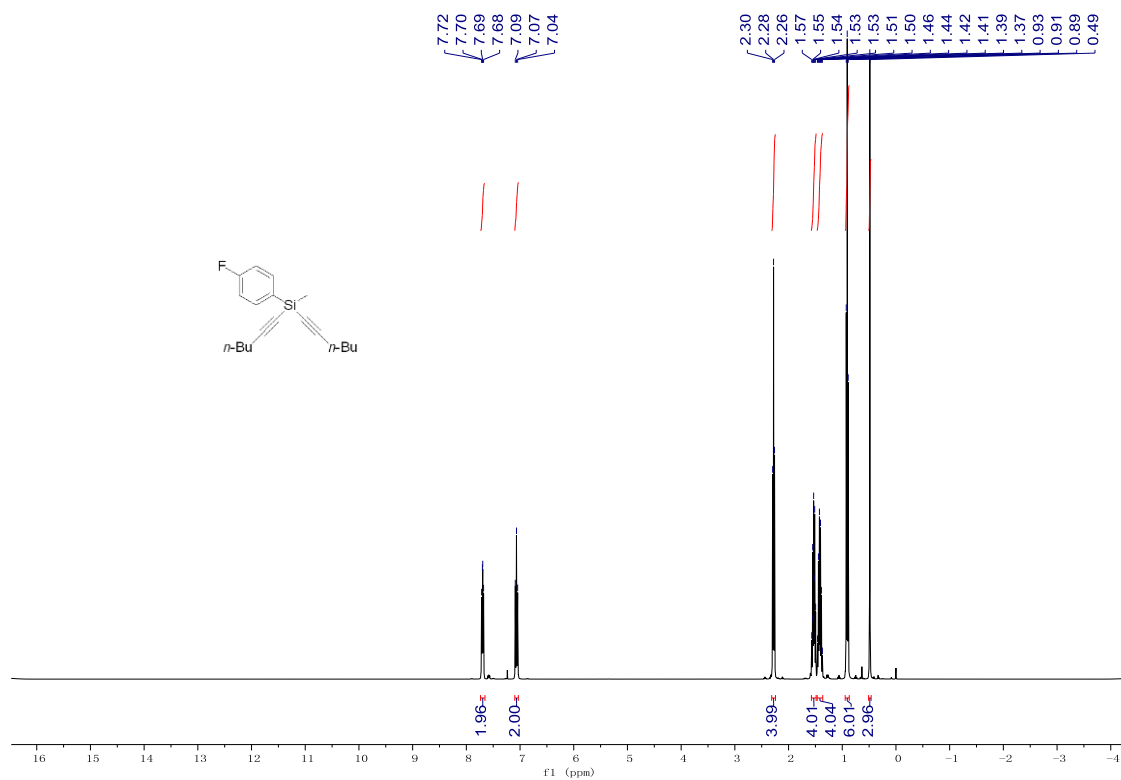

# $^{13}\text{C}$ NMR of **1d**

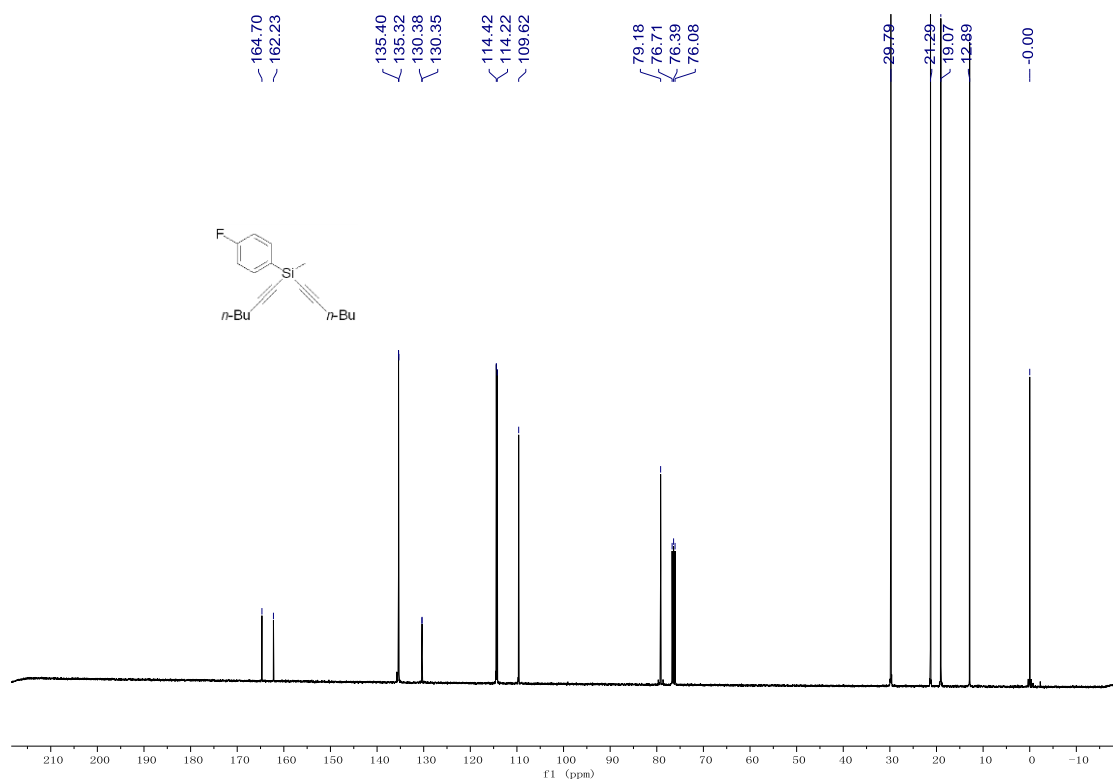

# <sup>1</sup>H NMR of **1e**

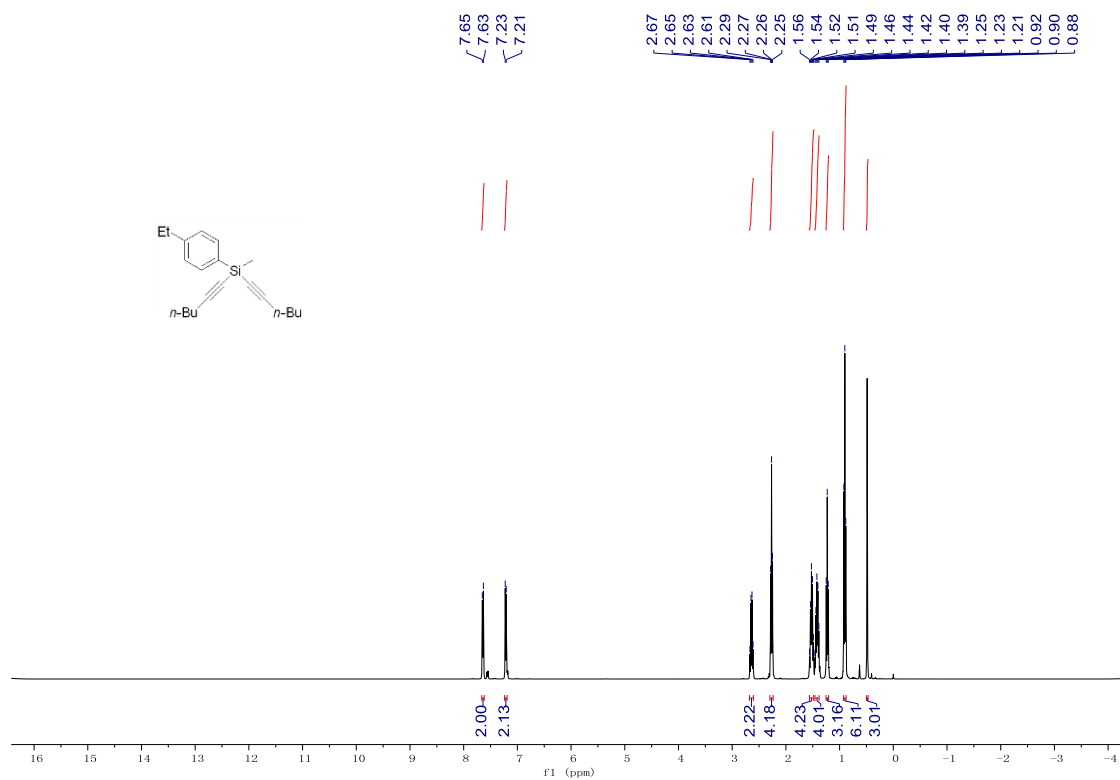

# <sup>13</sup>C NMR of **1e**

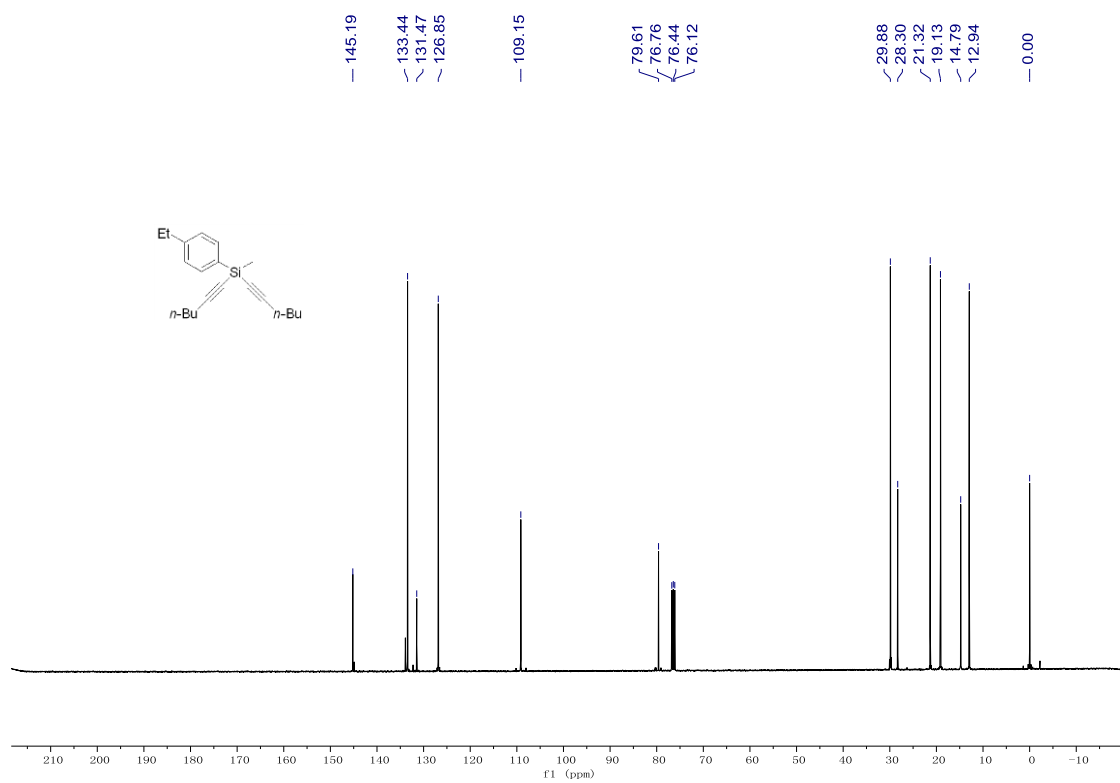



# $^1\text{H}$ NMR of **1f**

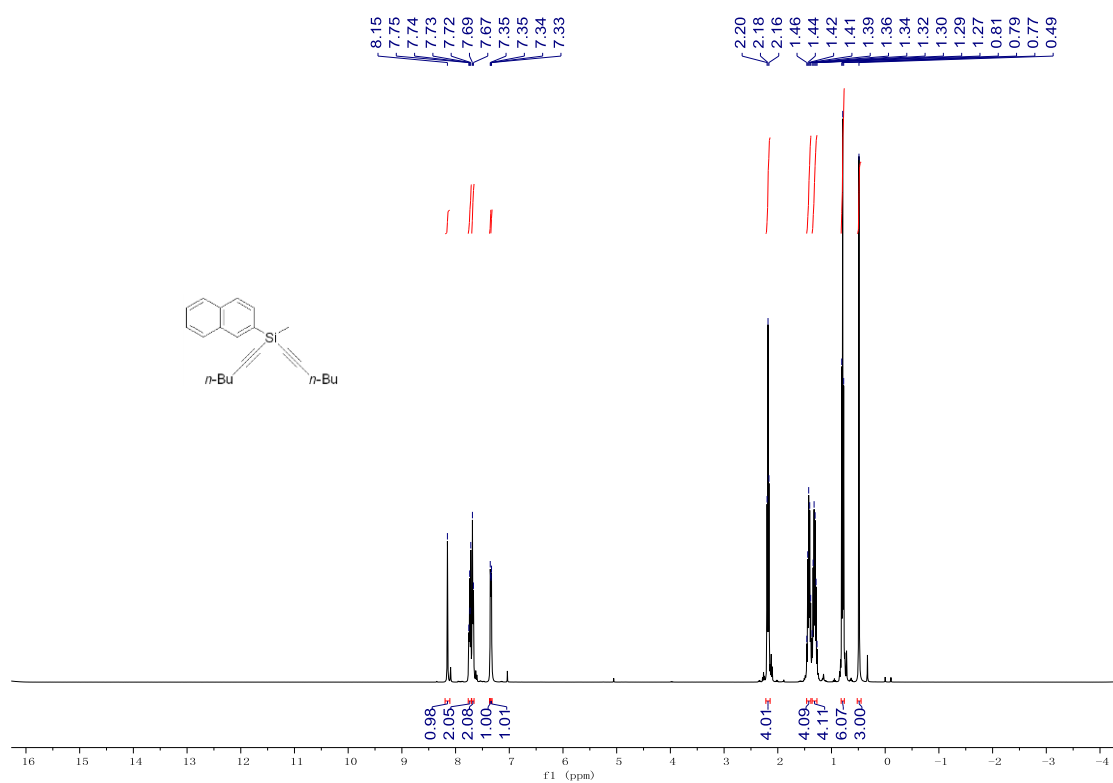

# $^{13}\text{C}$ NMR of **1f**

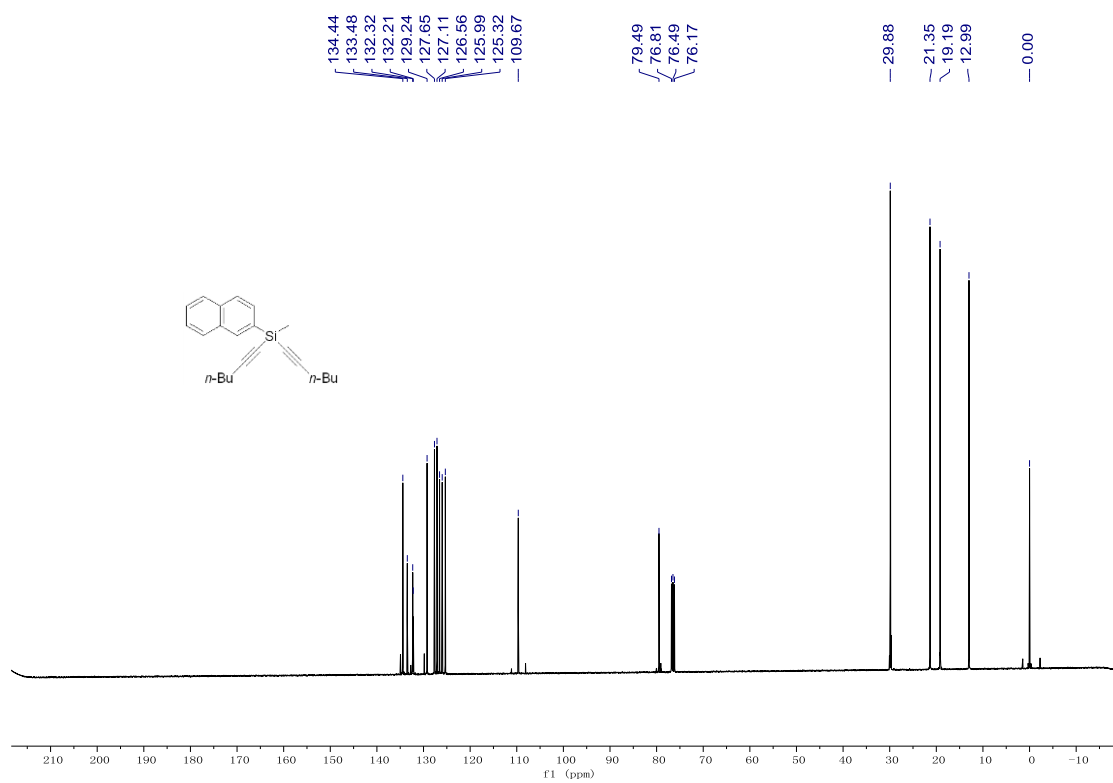

# $^1\text{H}$ NMR of **1g**

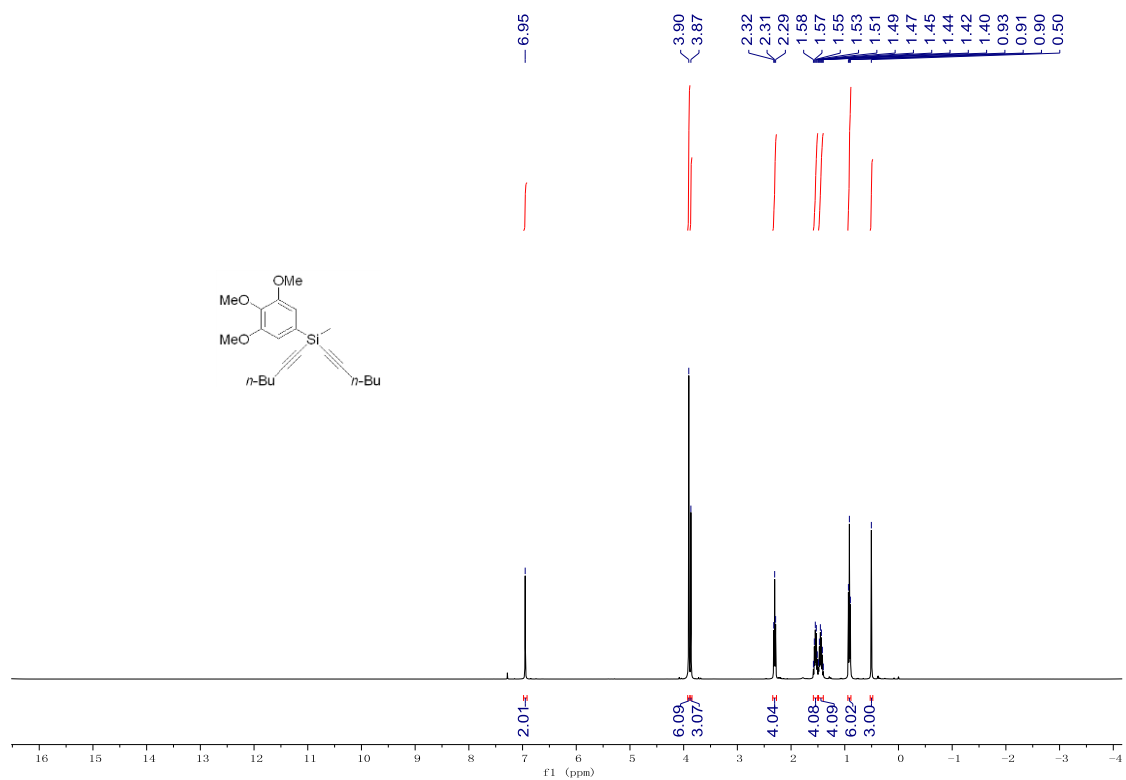

# $^{13}\text{C}$ NMR of **1g**

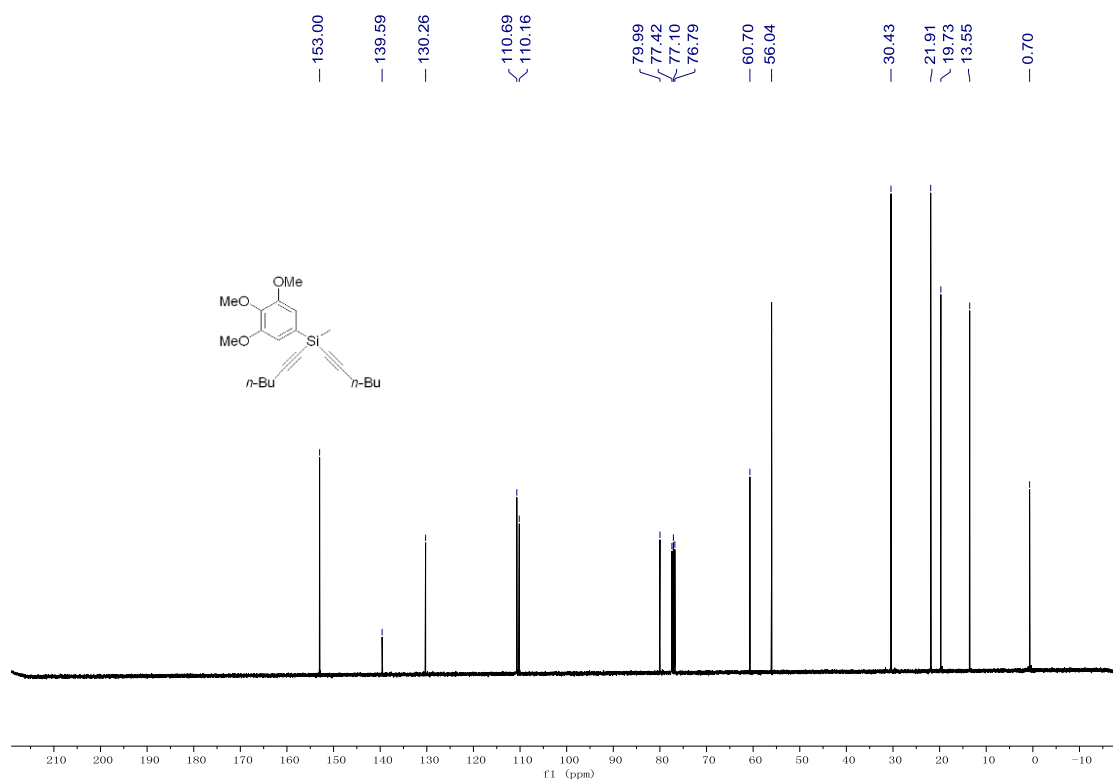

# $^1\text{H}$ NMR of **1h**

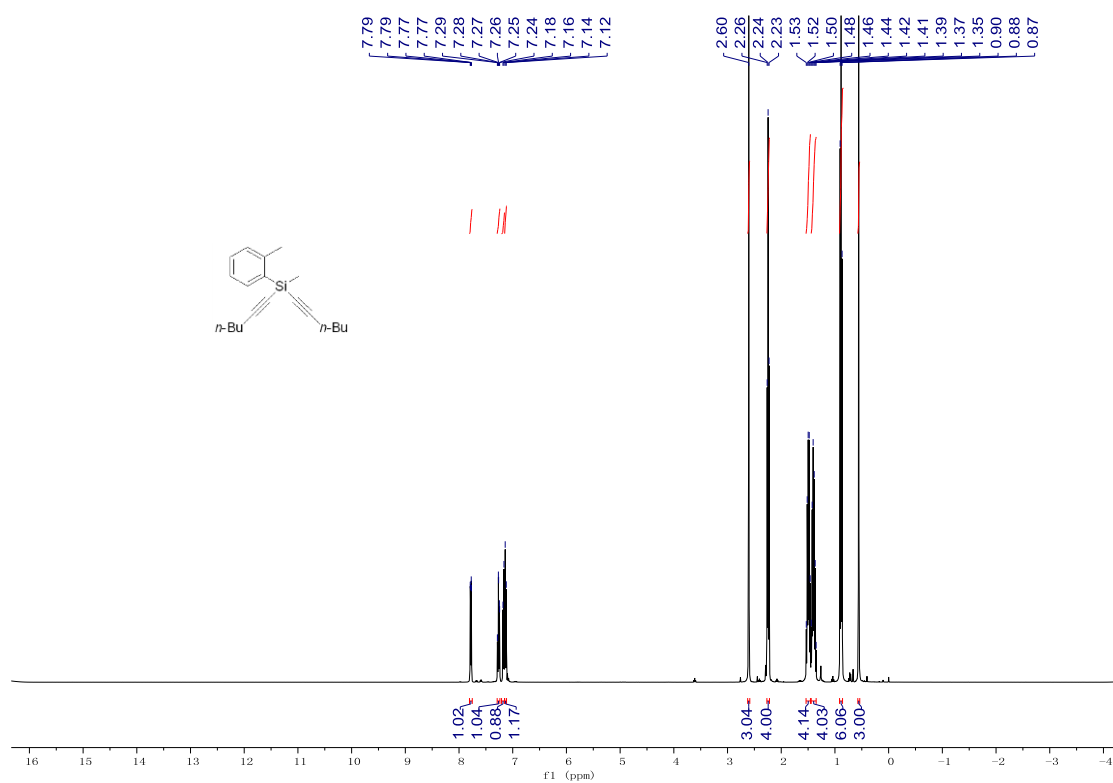

# $^{13}\text{C}$ NMR of **1h**

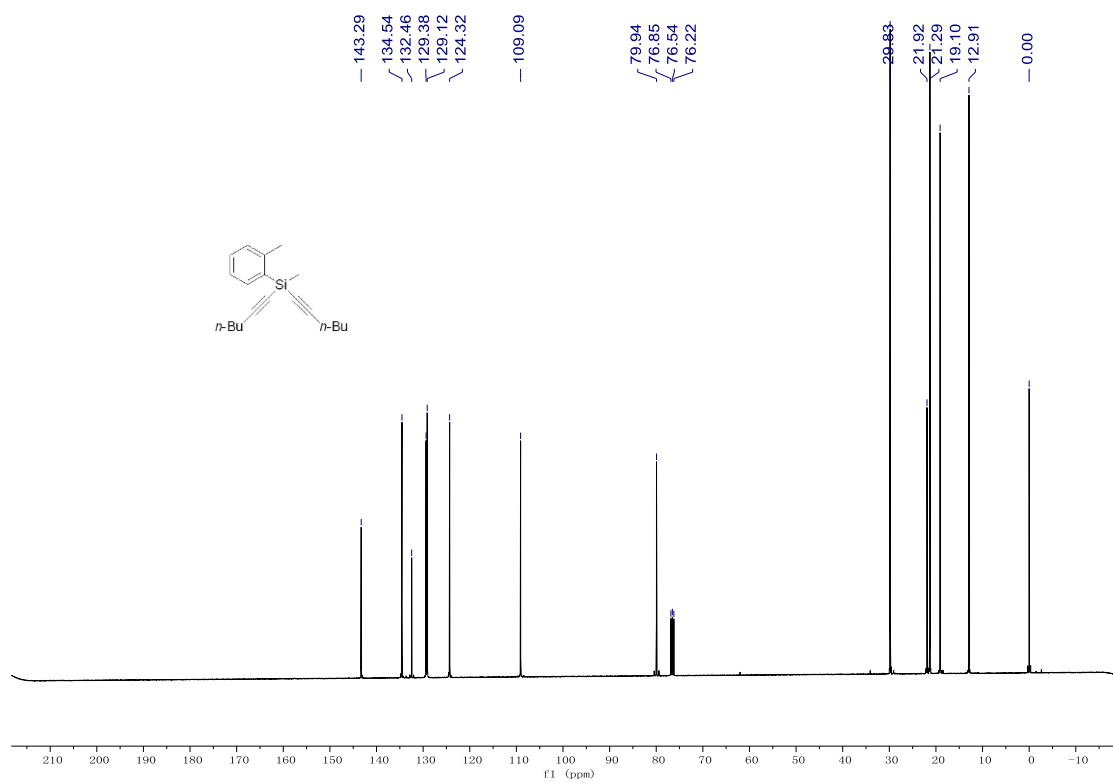





# $^1\text{H}$ NMR of **1k**

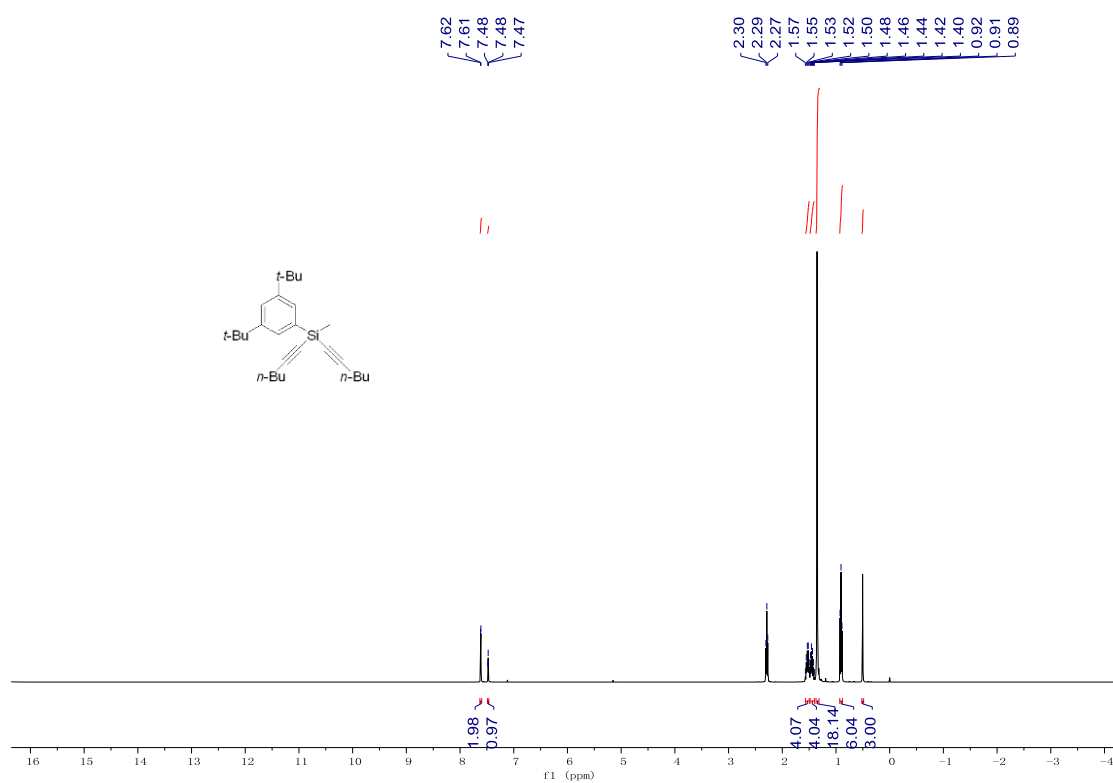

# $^{13}\text{C}$ NMR of **1k**

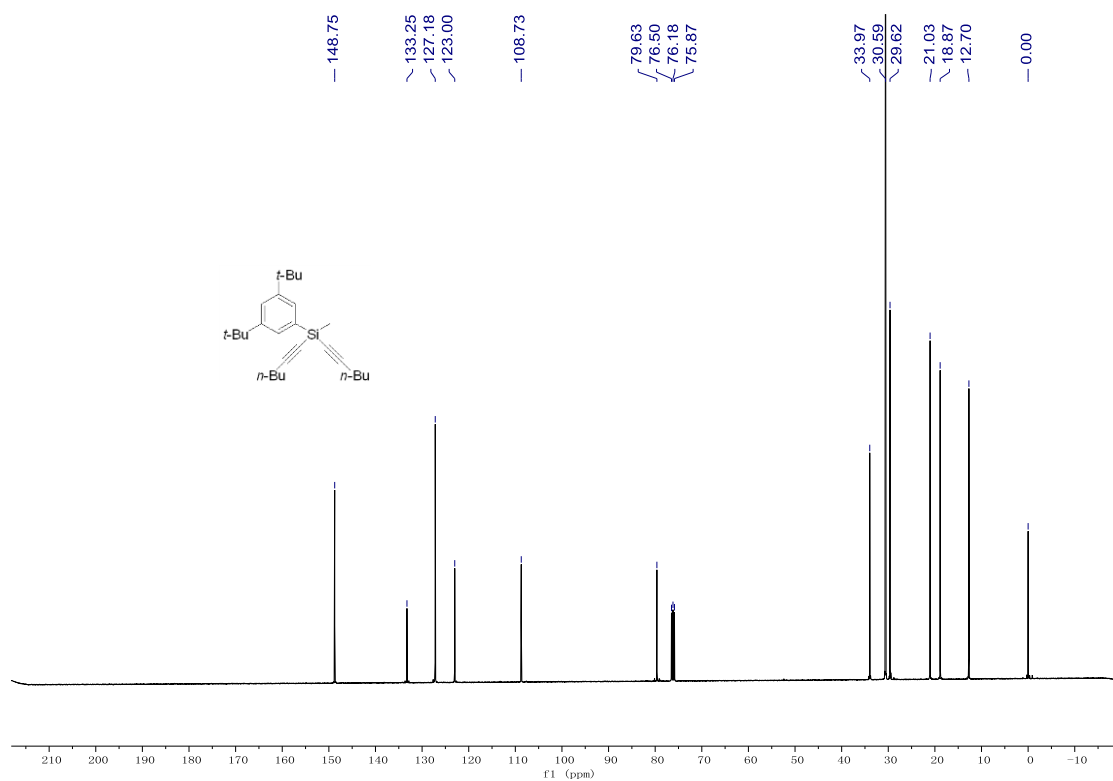

# $^1\text{H}$ NMR of **11**

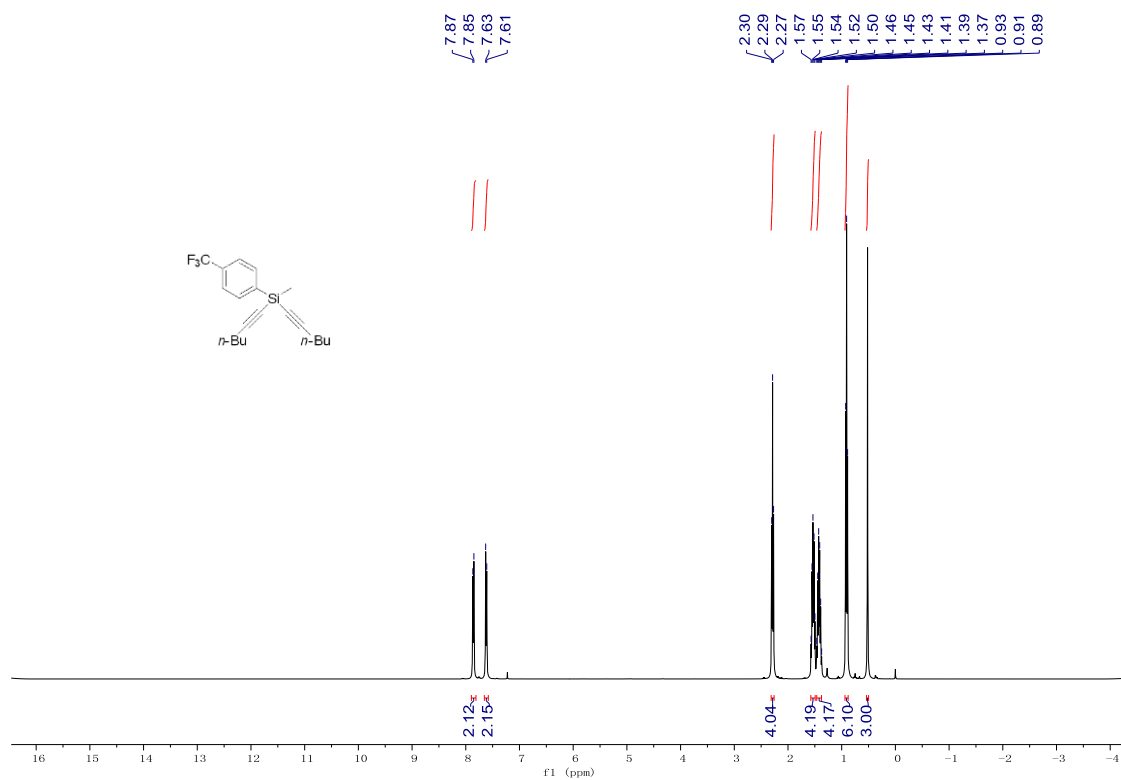

# $^{13}\text{C}$ NMR of **11**

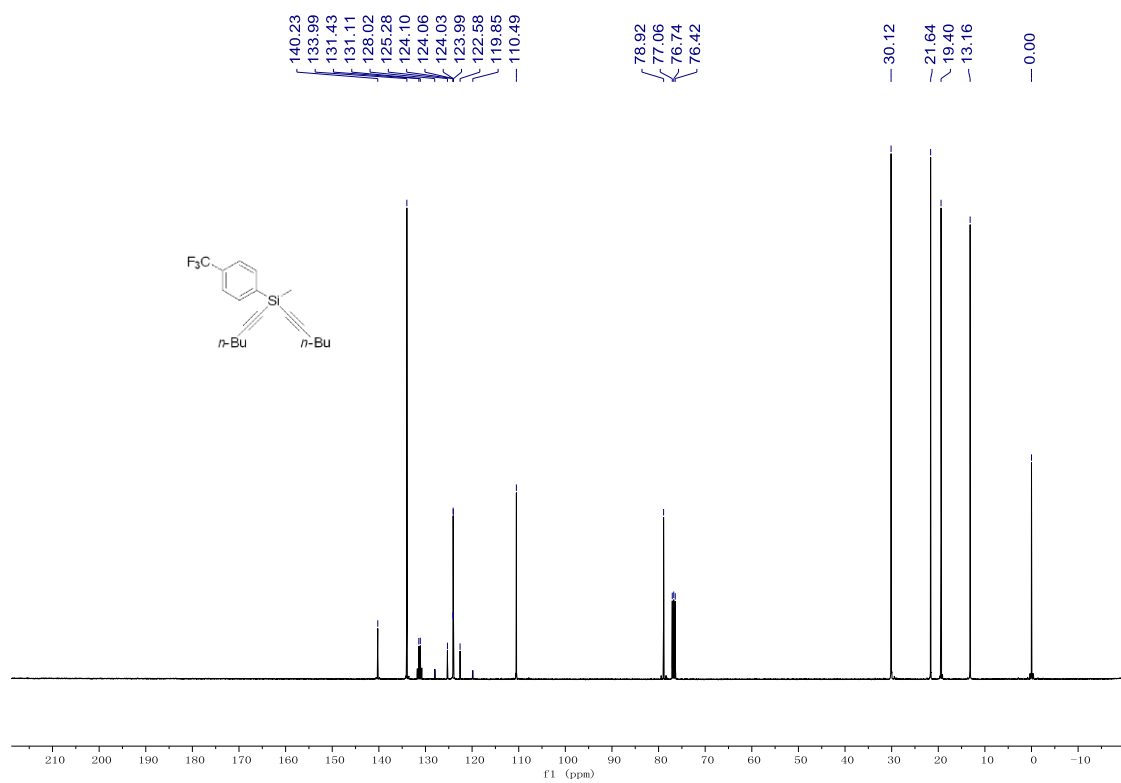

# <sup>1</sup>H NMR of **1m**

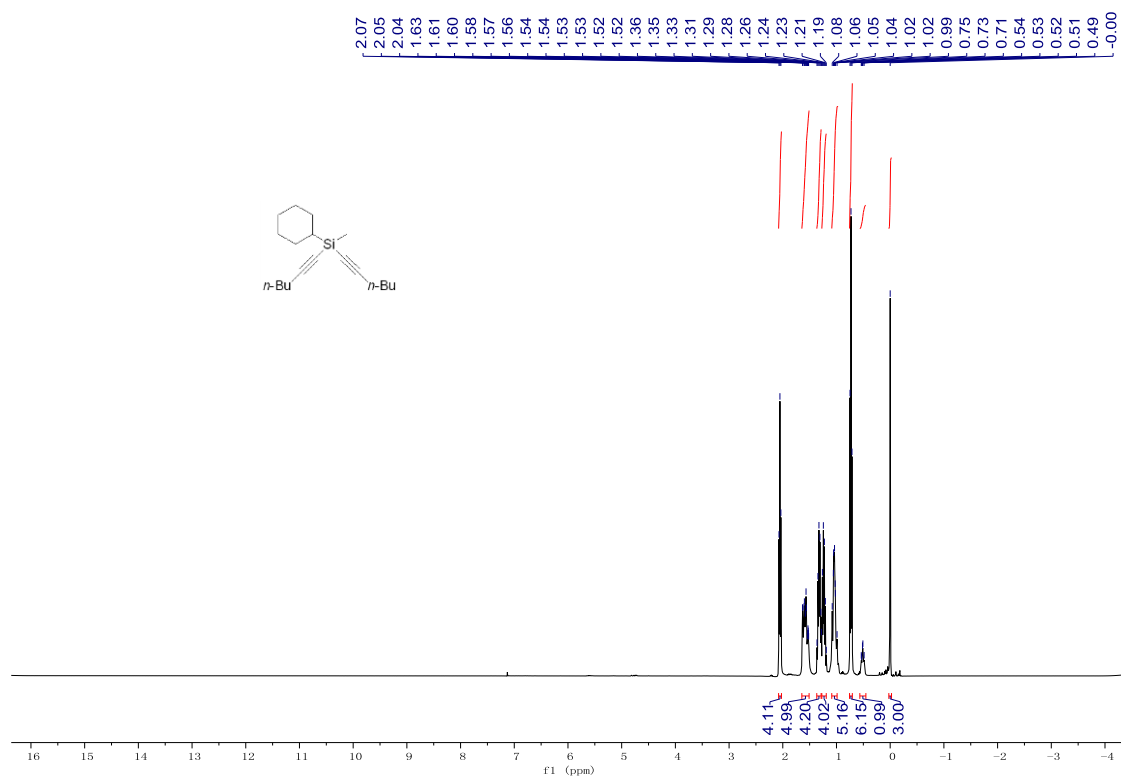

# <sup>13</sup>C NMR of **1m**

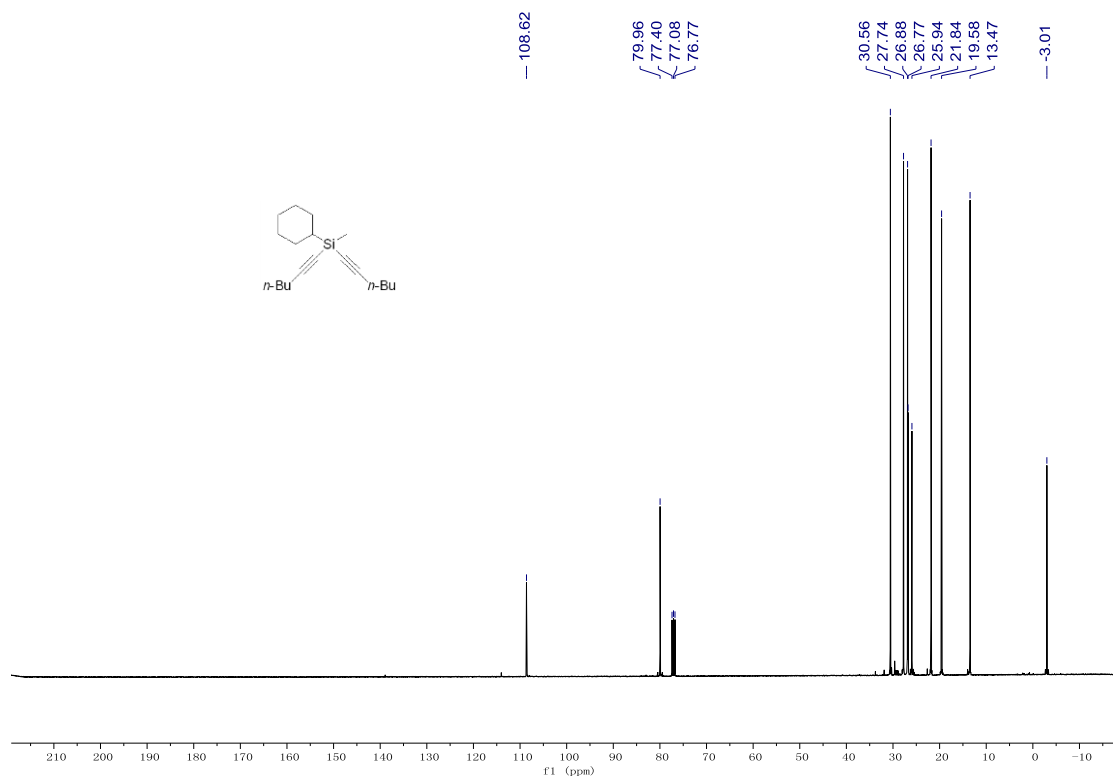



# $^1\text{H}$ NMR of **1n**

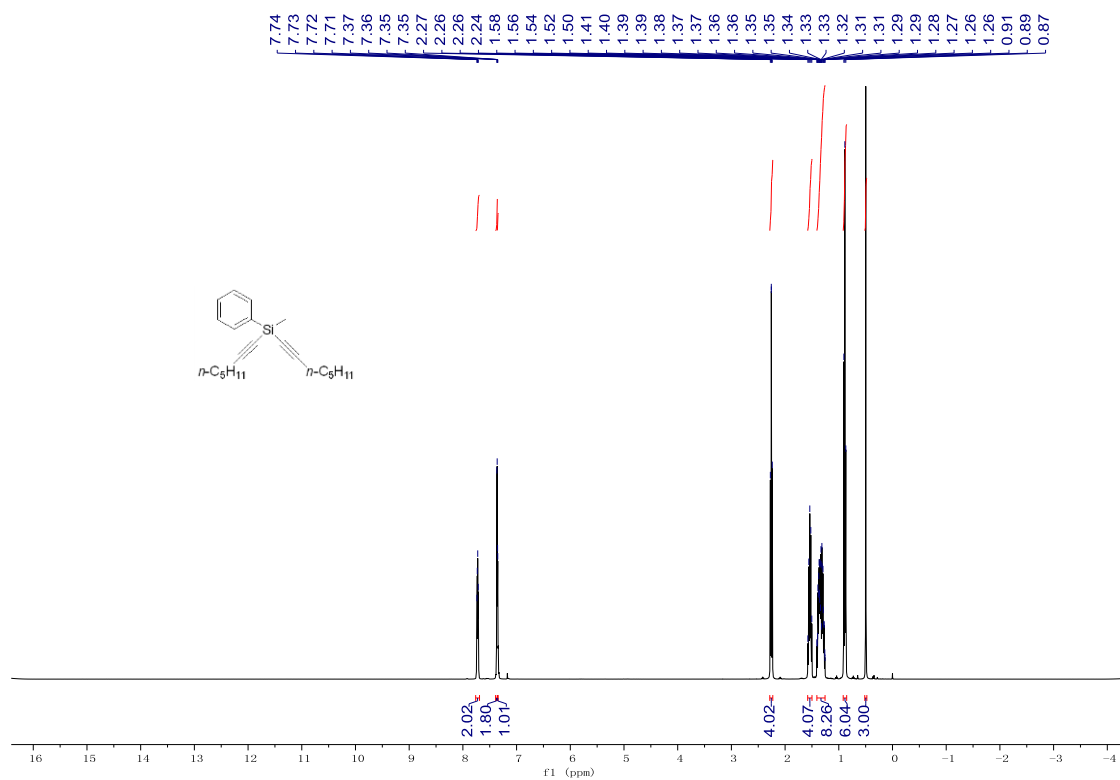

# $^{13}\text{C}$ NMR of **1n**

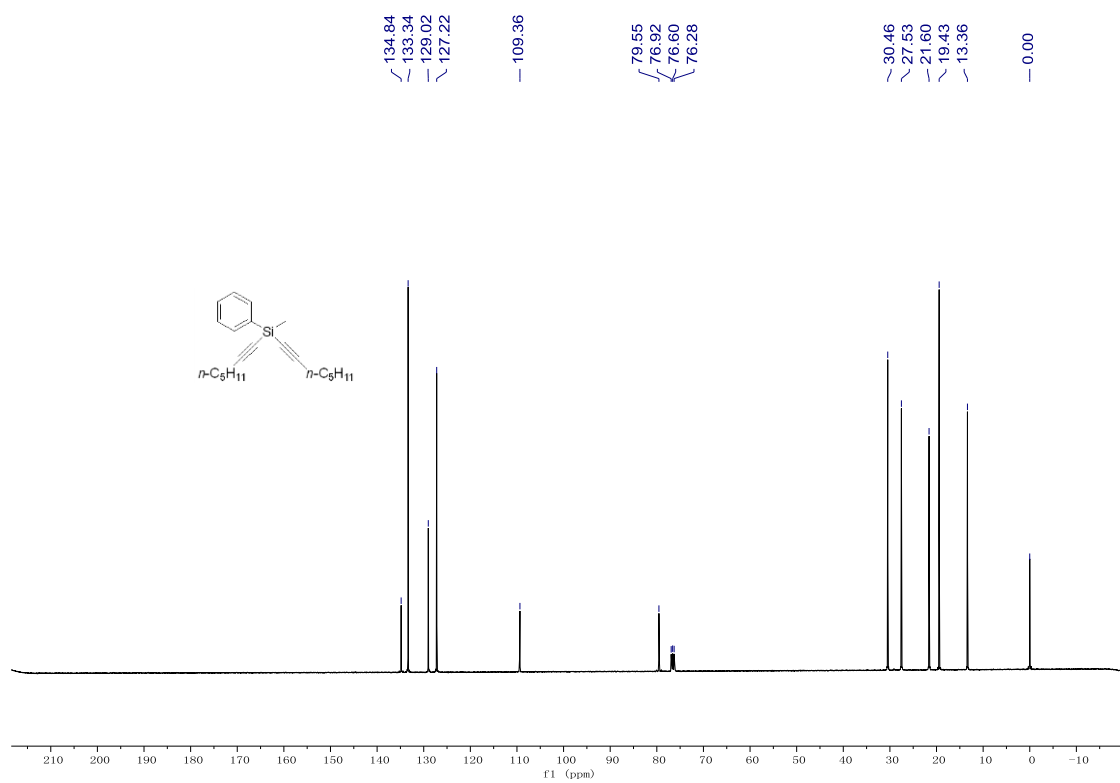



# <sup>1</sup>H NMR of **1p**

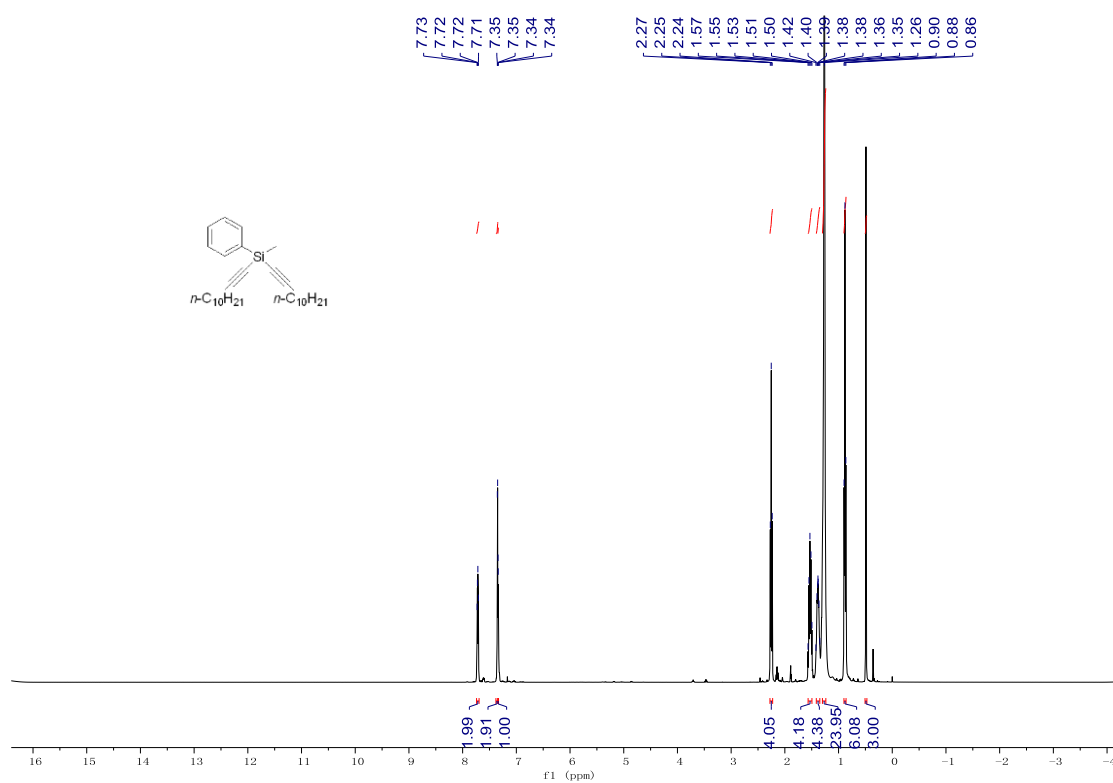

# <sup>13</sup>C NMR of **1p**

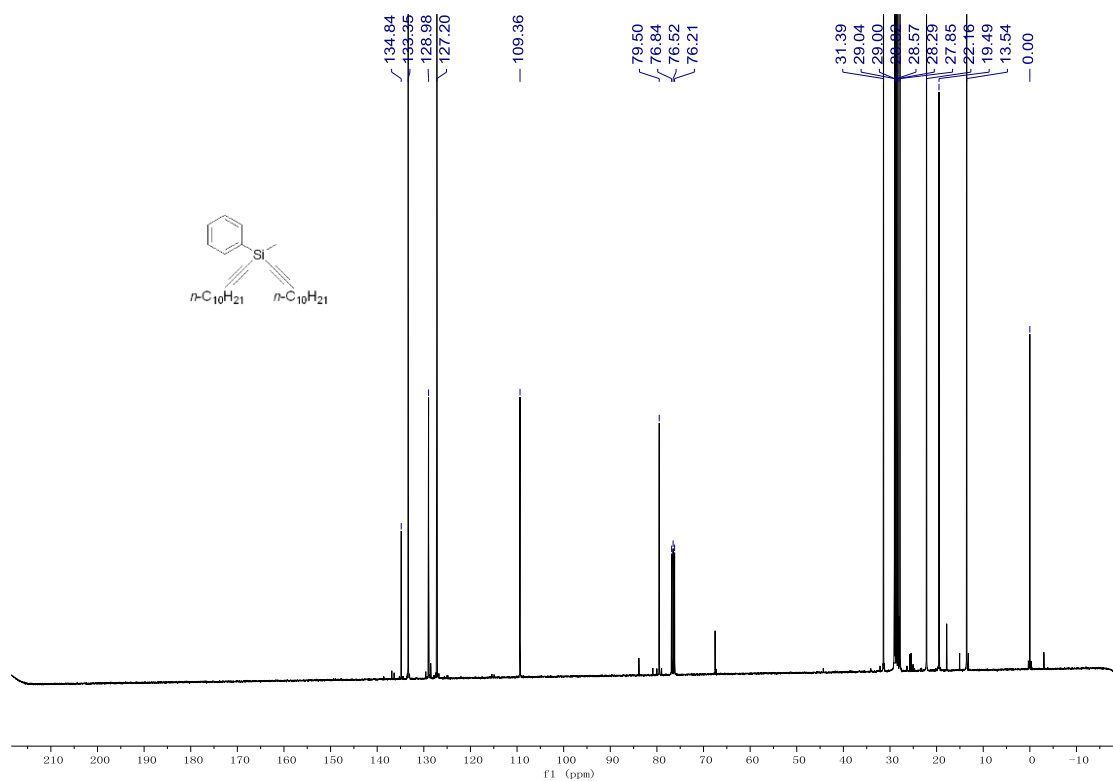

# <sup>1</sup>H NMR of **1q**

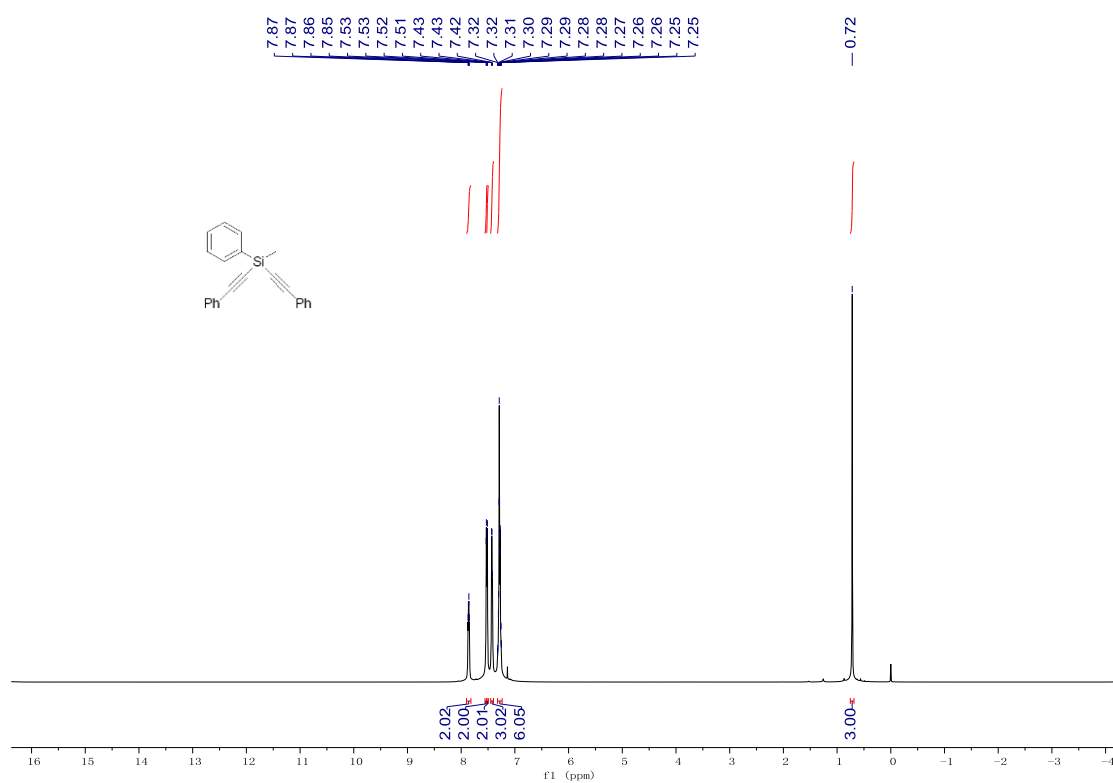

# <sup>13</sup>C NMR of **1q**

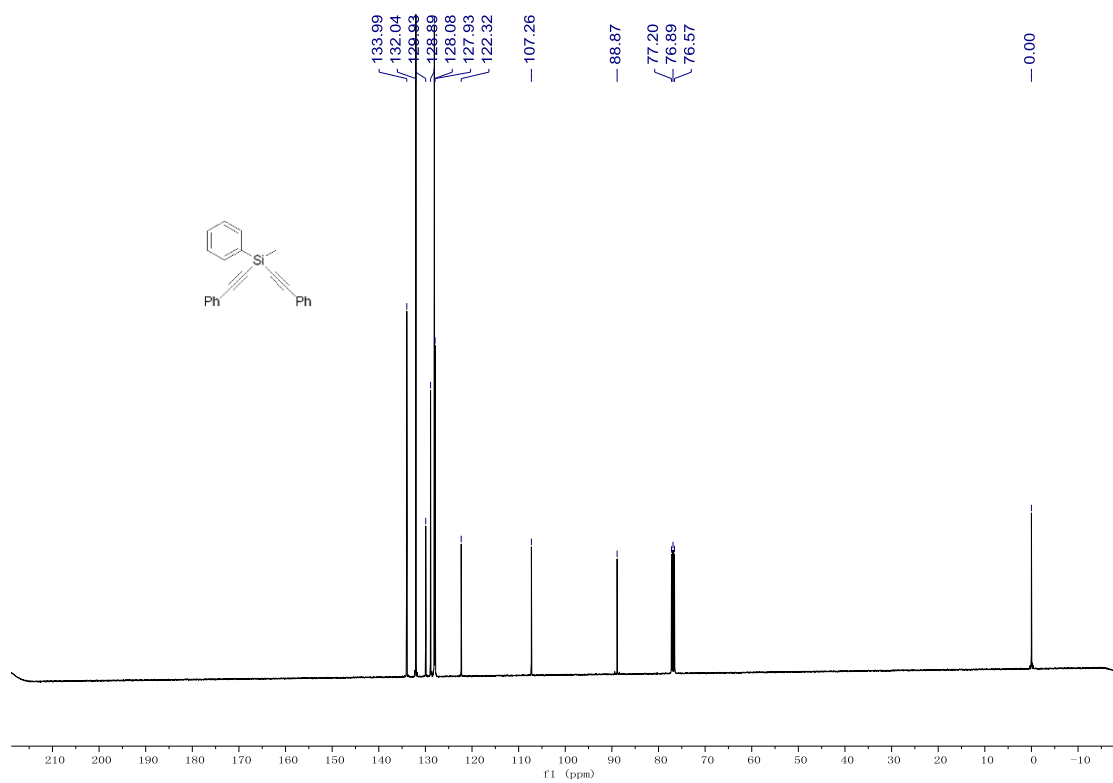

# $^1\text{H}$ NMR of **1r**

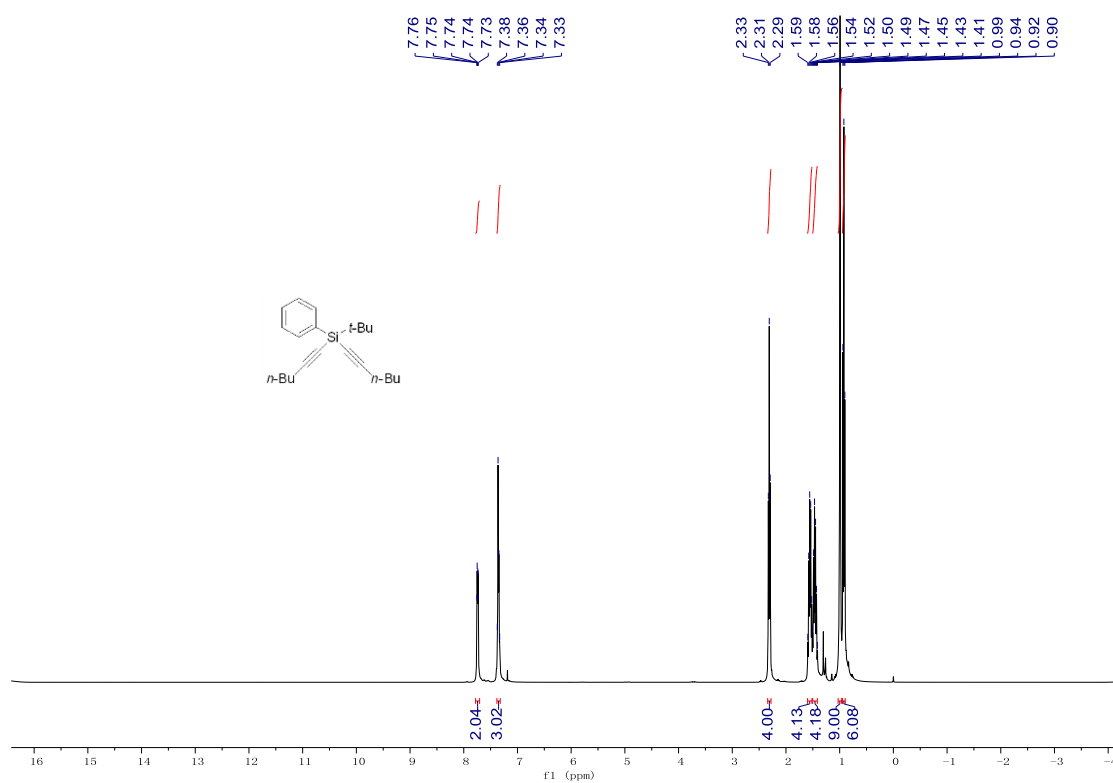

# $^{13}\text{C}$ NMR of **1q**

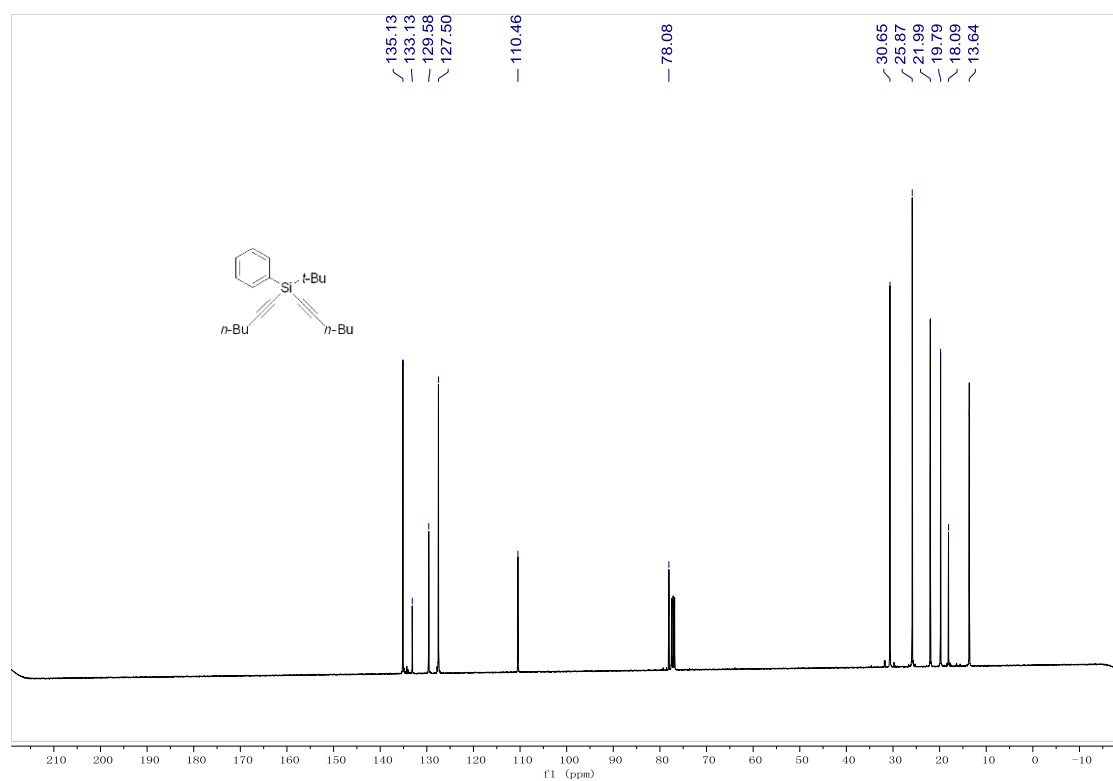

### $^1\text{H}$ NMR of **3a**

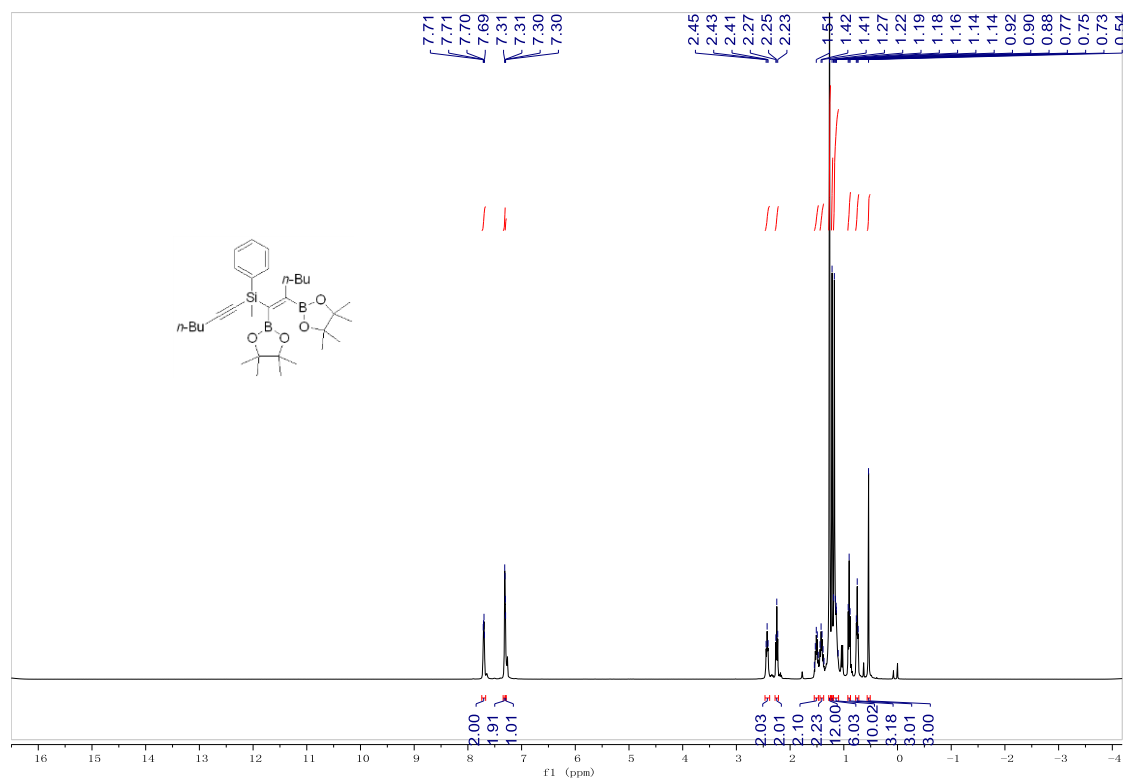

### $^{13}\text{C}$ NMR of **3a**

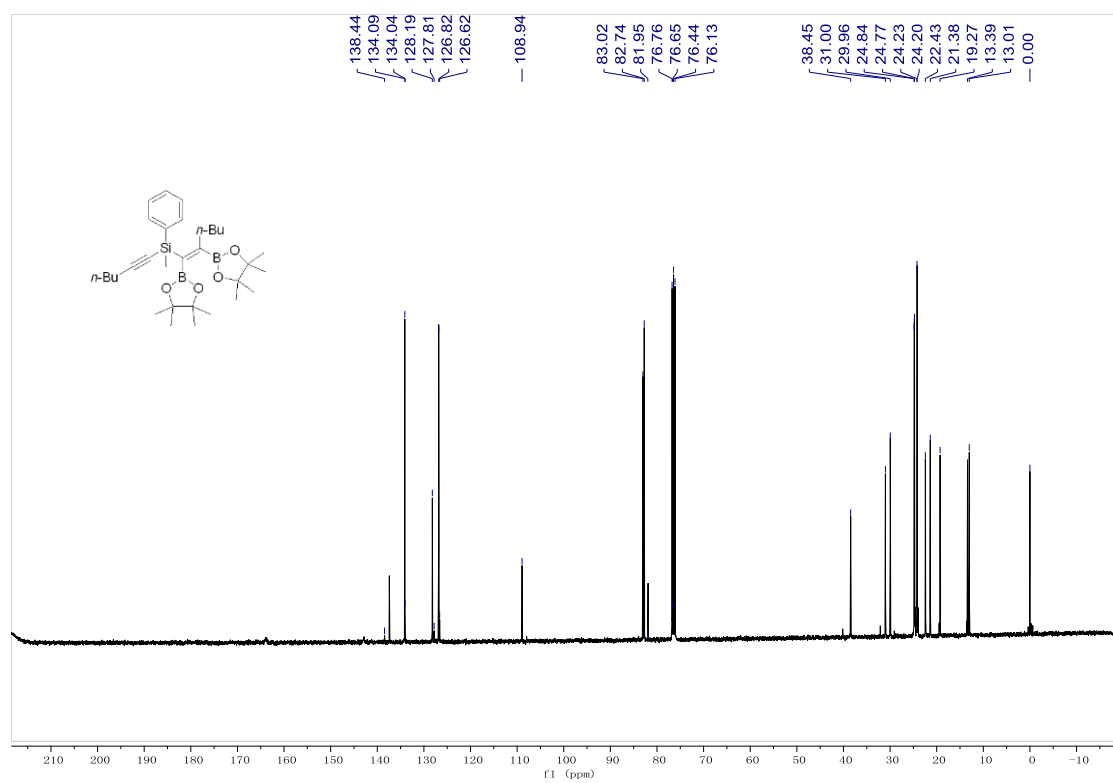

### $^1\text{H}$ NMR of **3b**

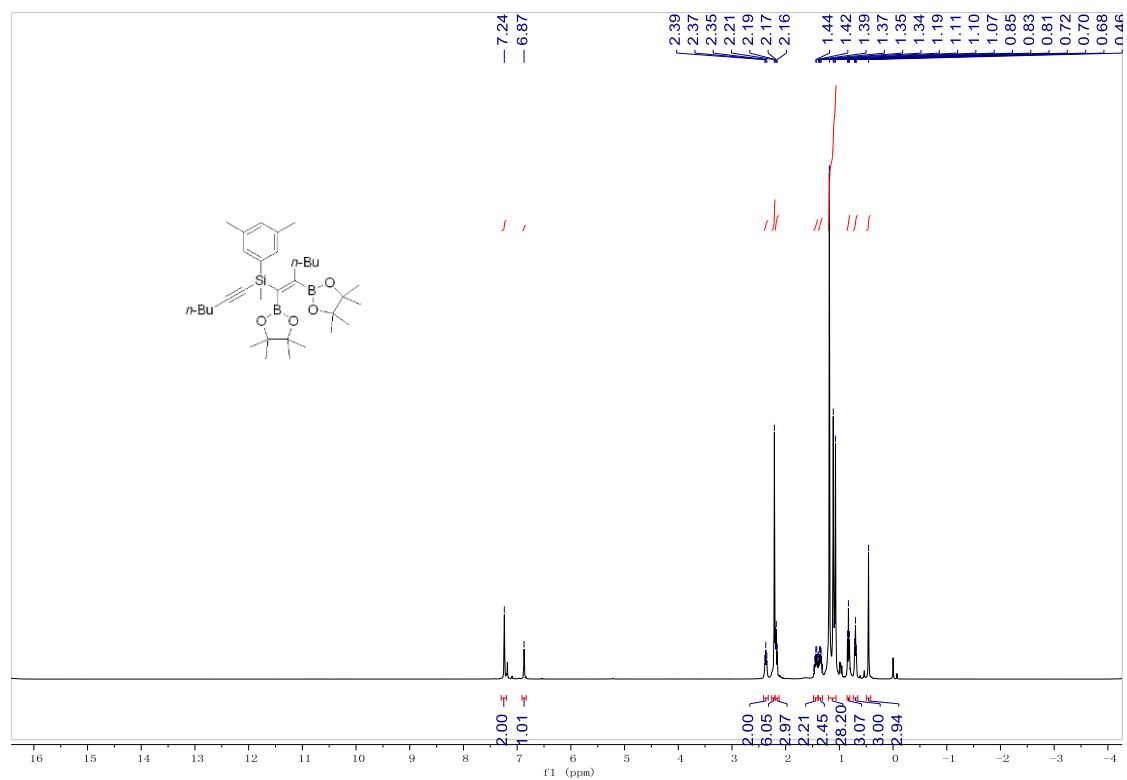

### $^{13}\text{C}$ NMR of **3b**

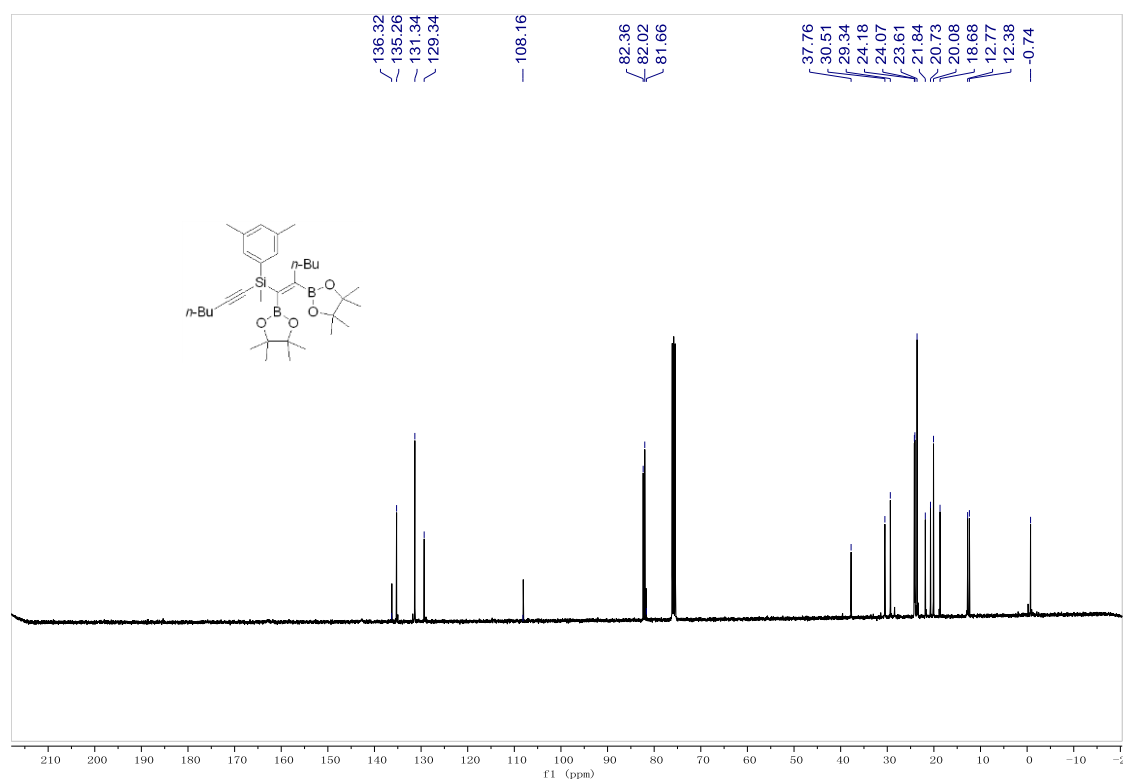

$^1\text{H}$  NMR of **3c**

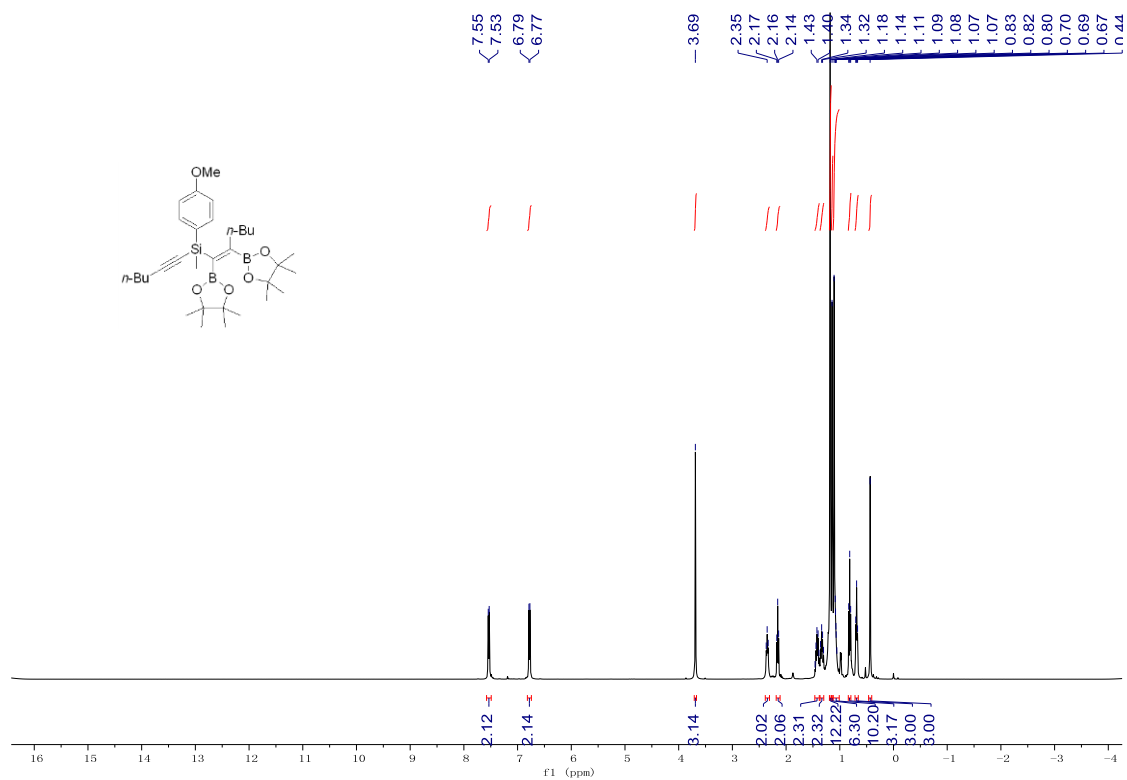

$^{13}\text{C}$  NMR of **3c**

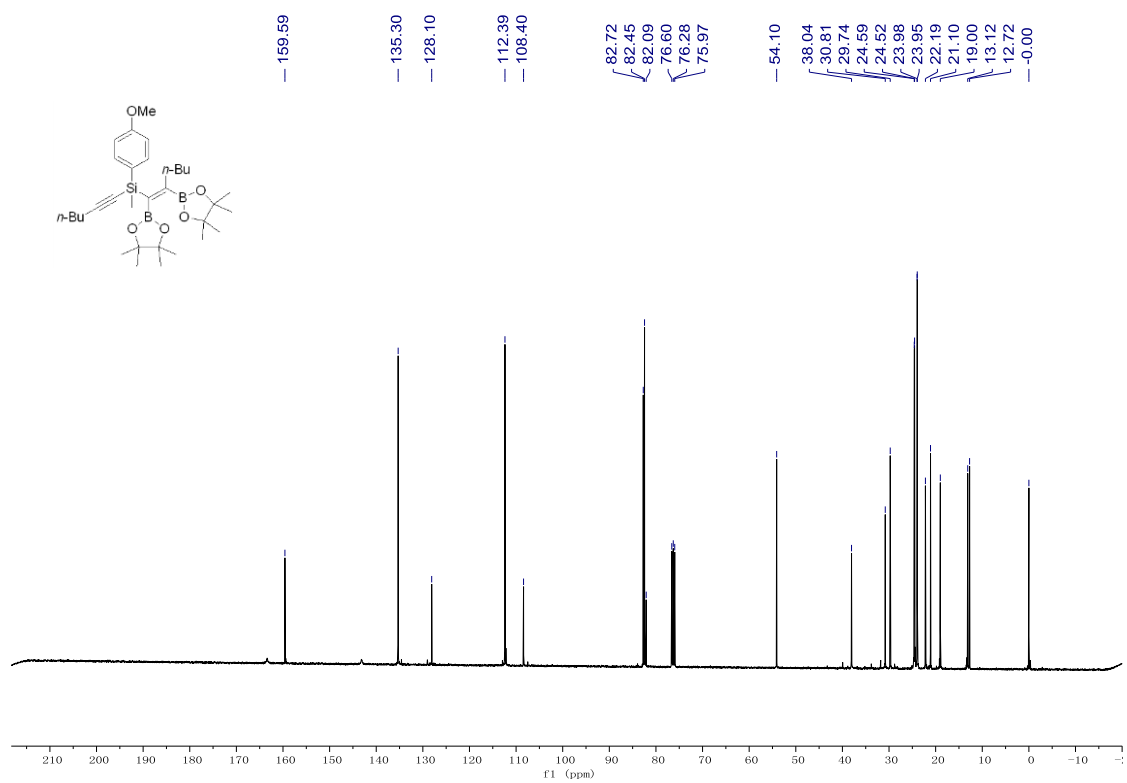



<sup>1</sup>H NMR of **3d**

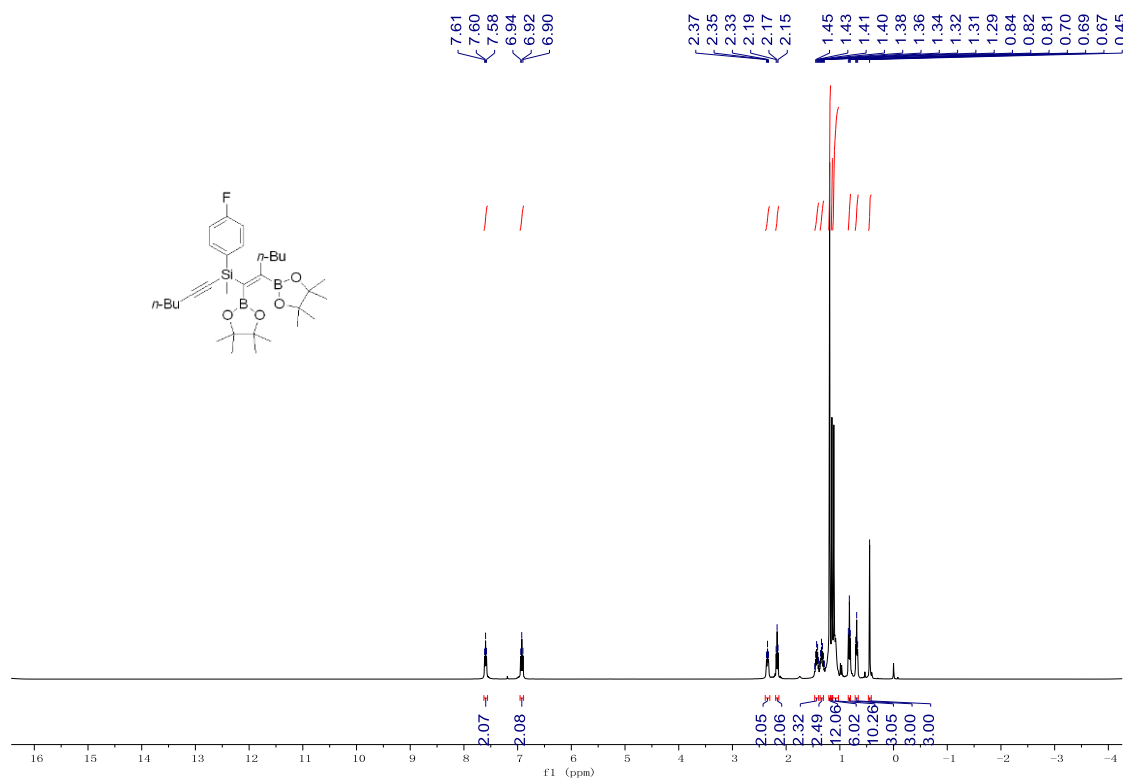

<sup>13</sup>C NMR of **3d**

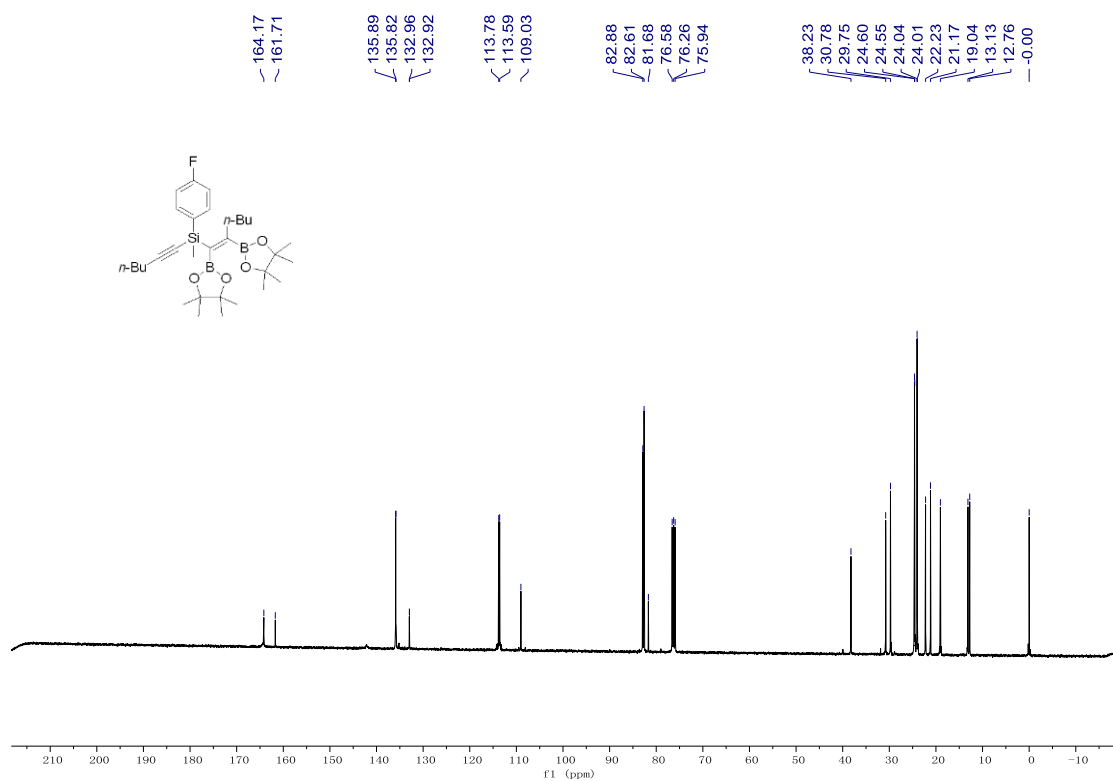

# $^1\text{H}$ NMR of **3e**

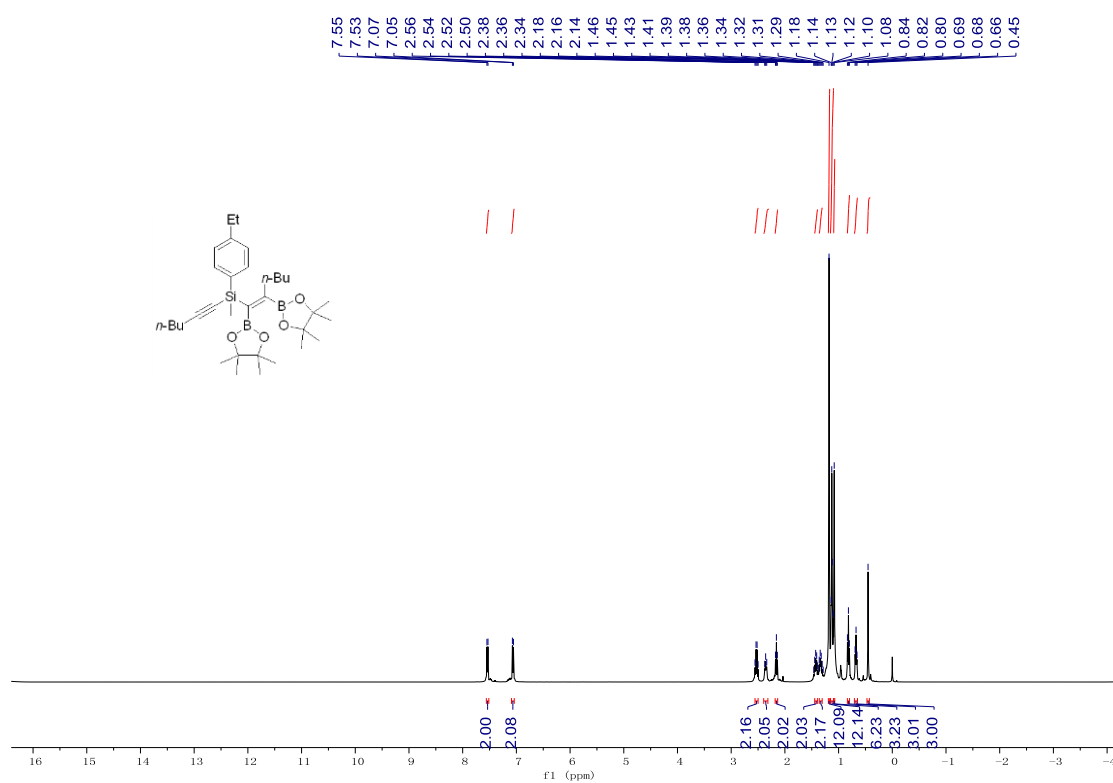

# $^{13}\text{C}$ NMR of **3e**

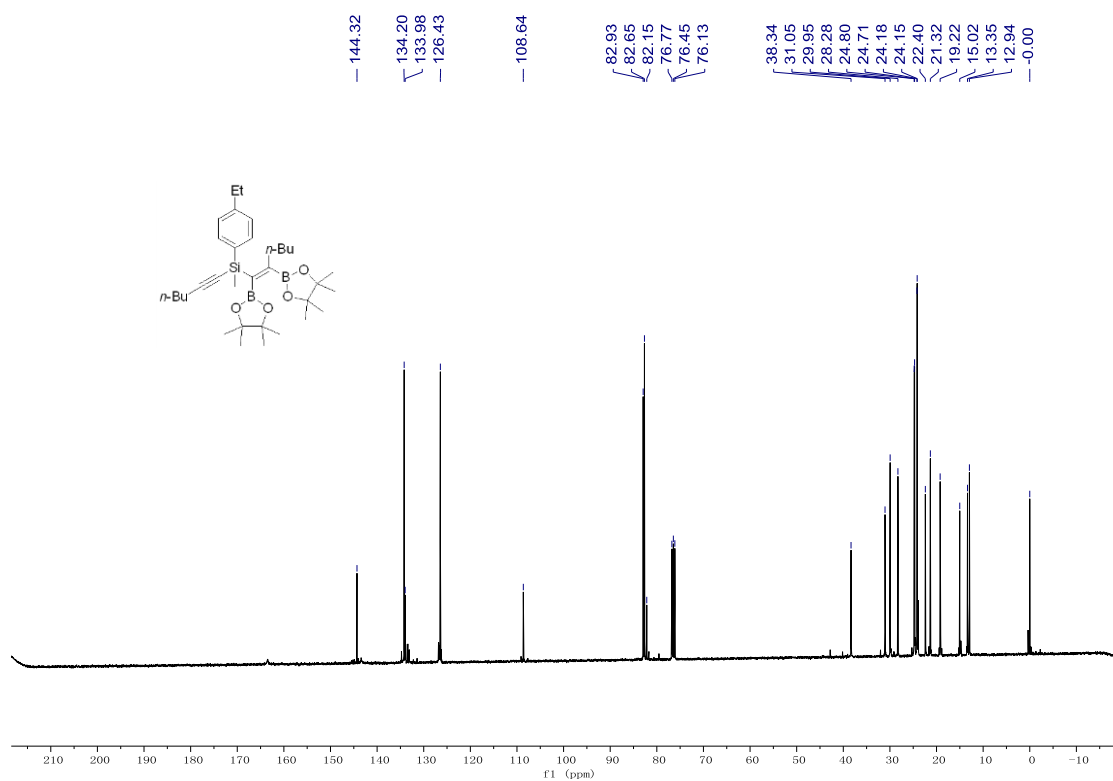

# $^1\text{H}$ NMR of **3f**

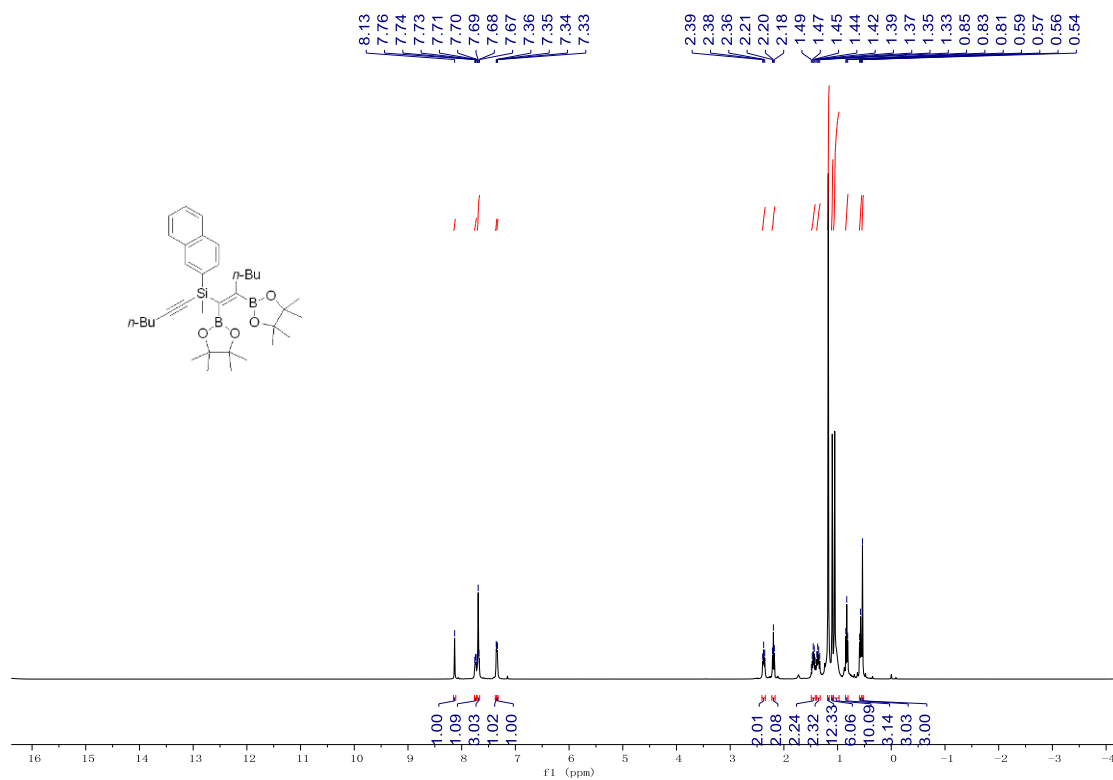

# $^{13}\text{C}$ NMR of **3f**

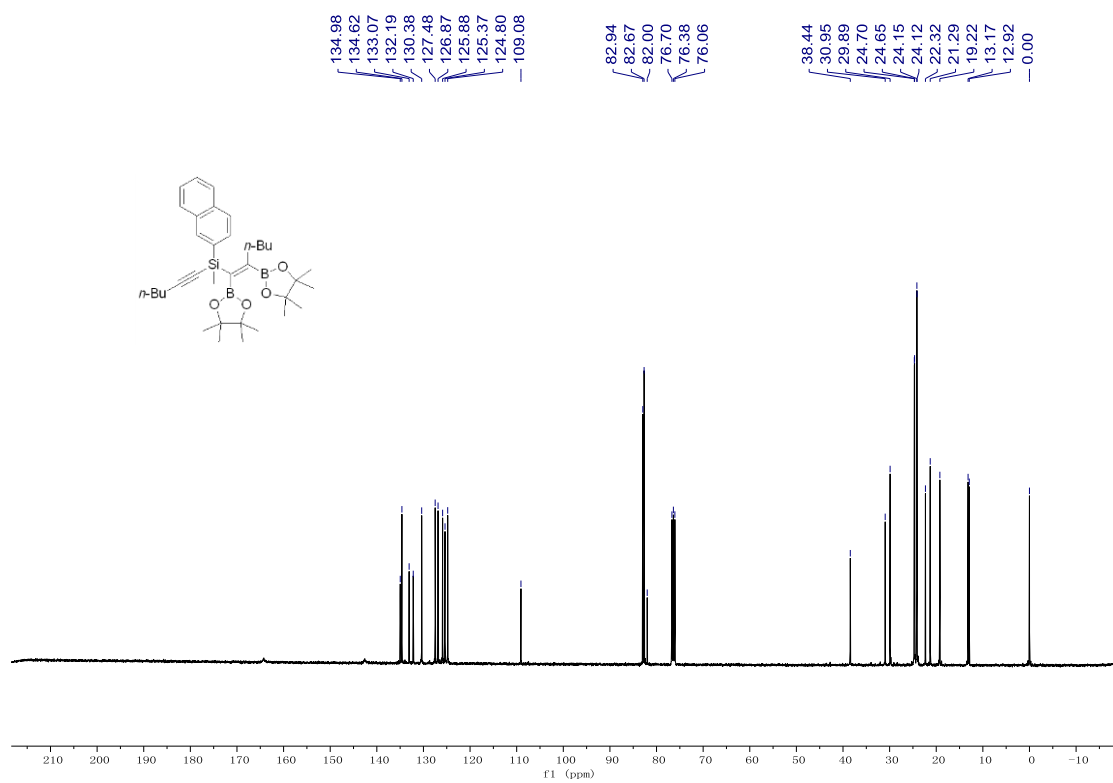

<sup>1</sup>H NMR of **3g**

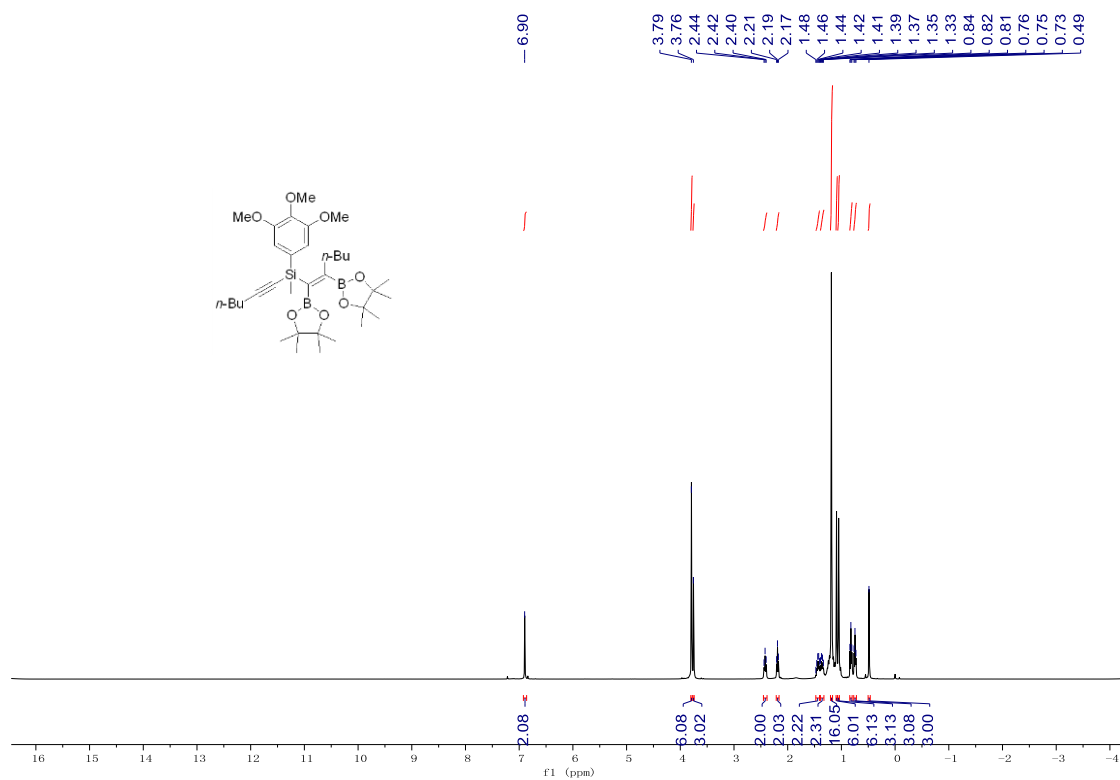

<sup>13</sup>C NMR of **3g**

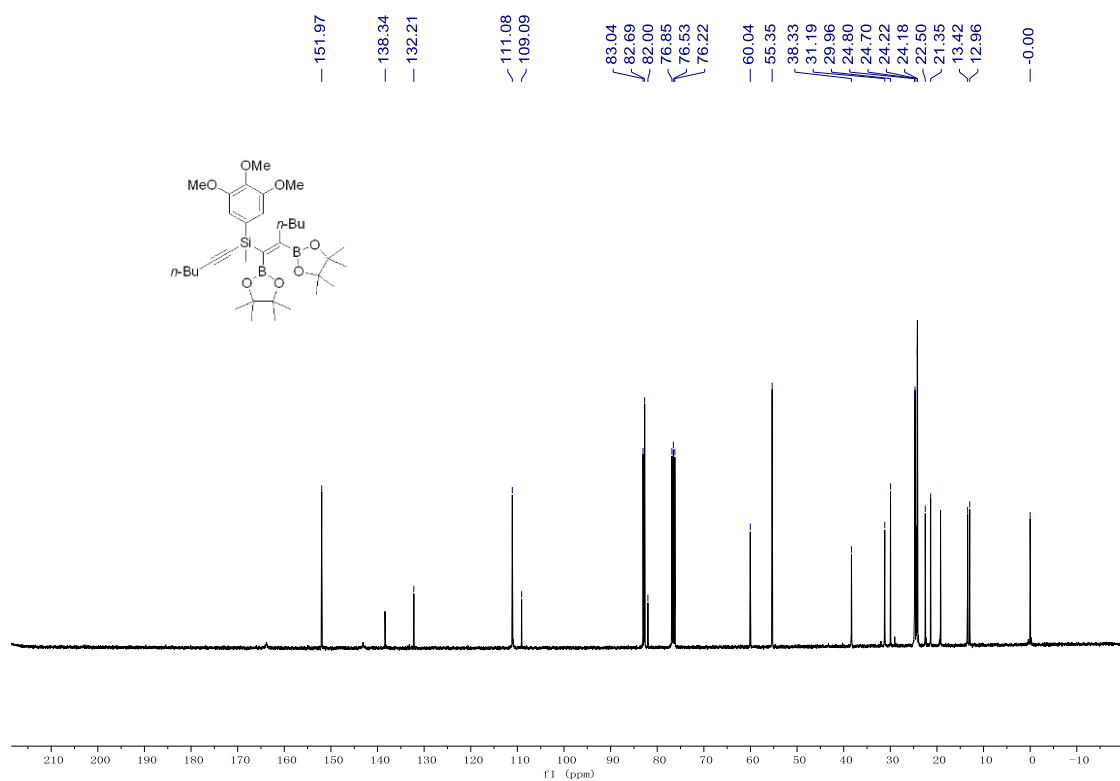

# <sup>1</sup>H NMR of 3h

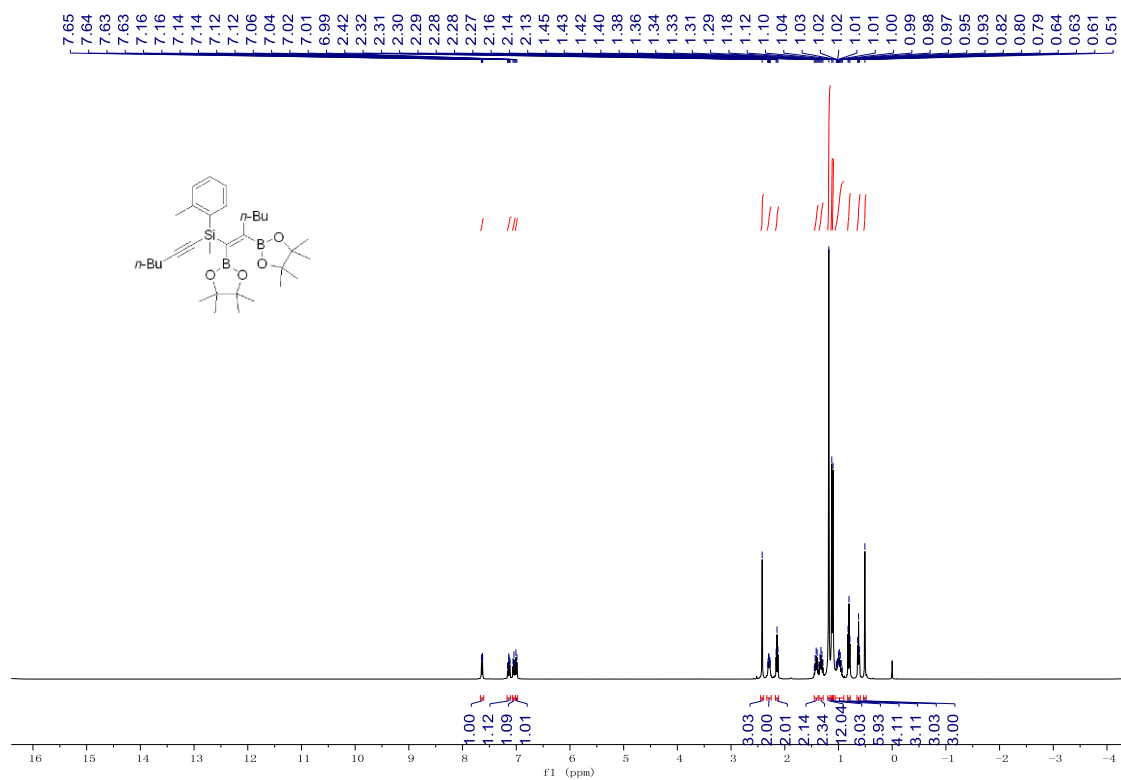

# <sup>13</sup>C NMR of 3h

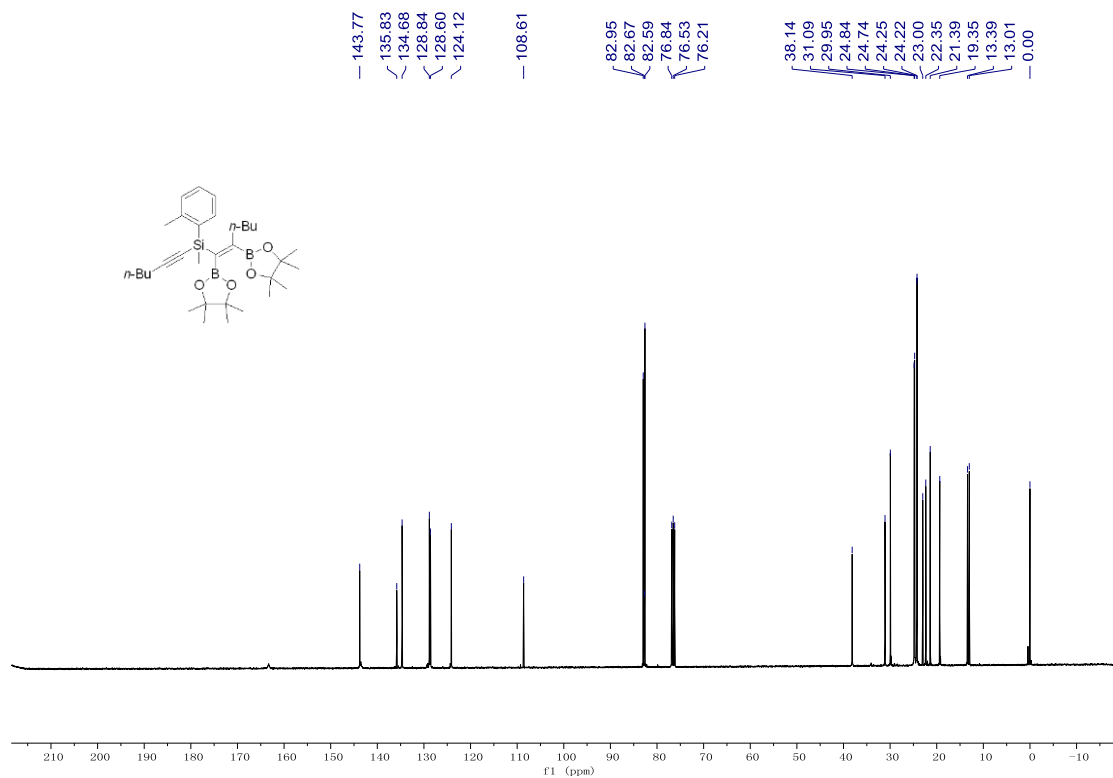

$^1\text{H}$  NMR of **3i**

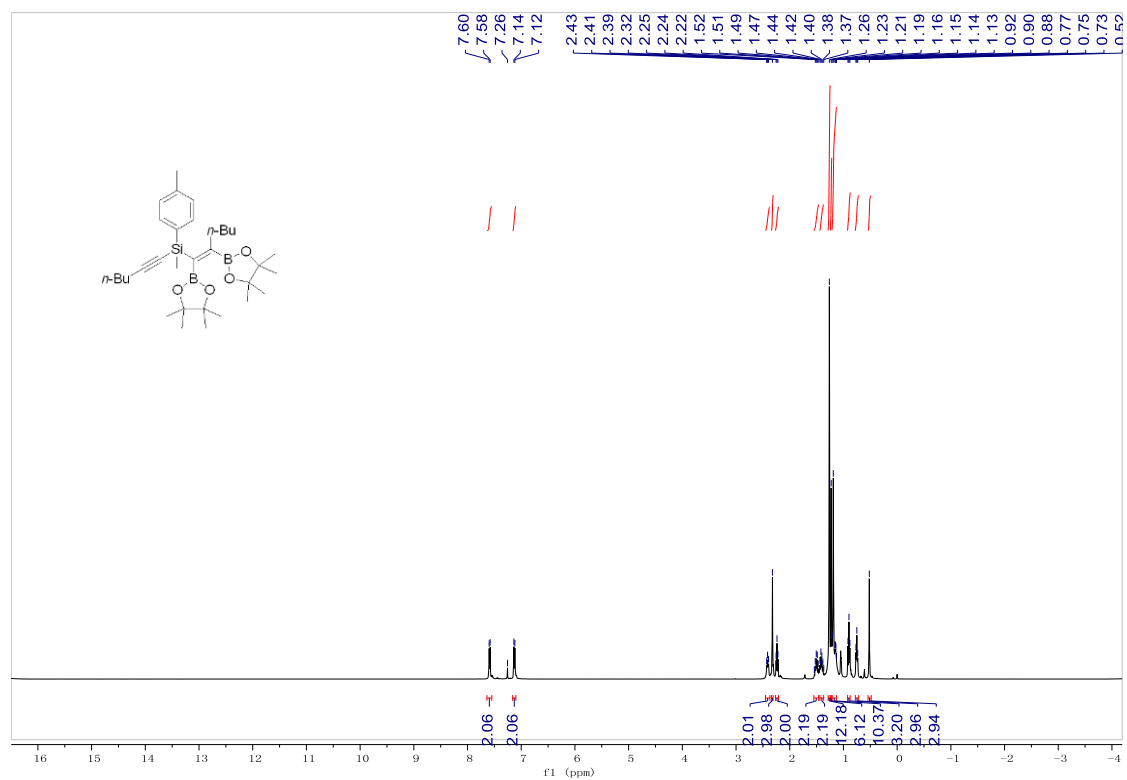

$^{13}\text{C}$  NMR of **3i**

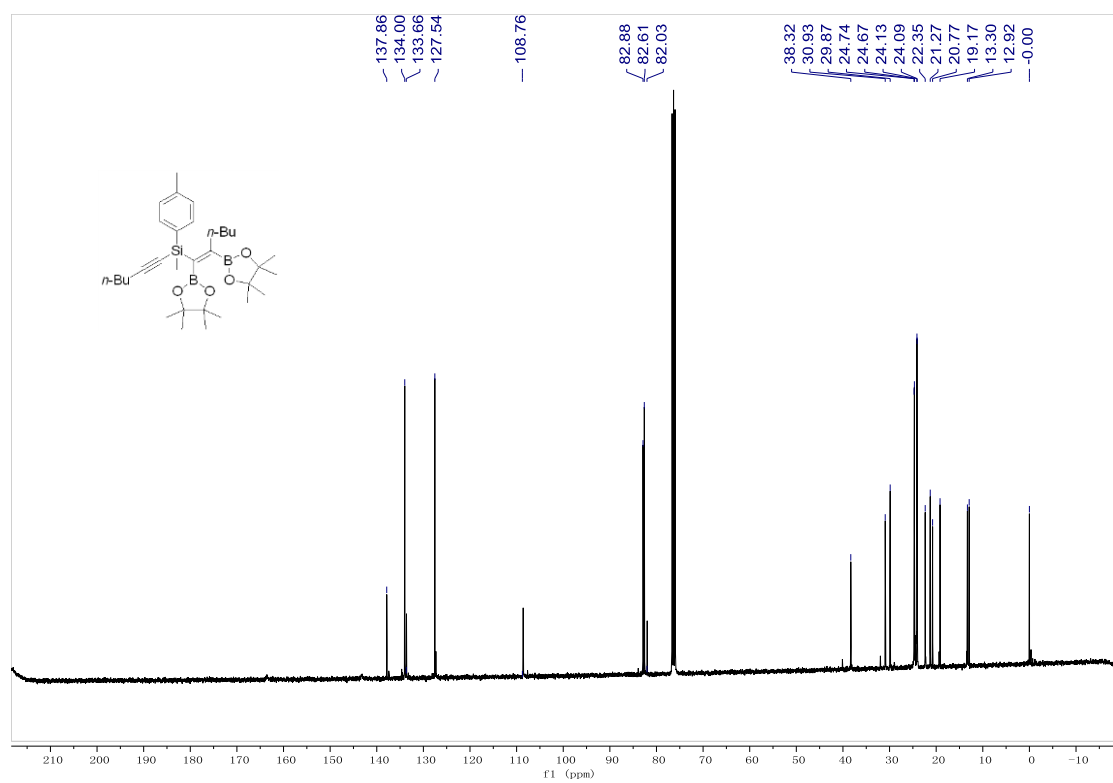

<sup>1</sup>H NMR of **3j**

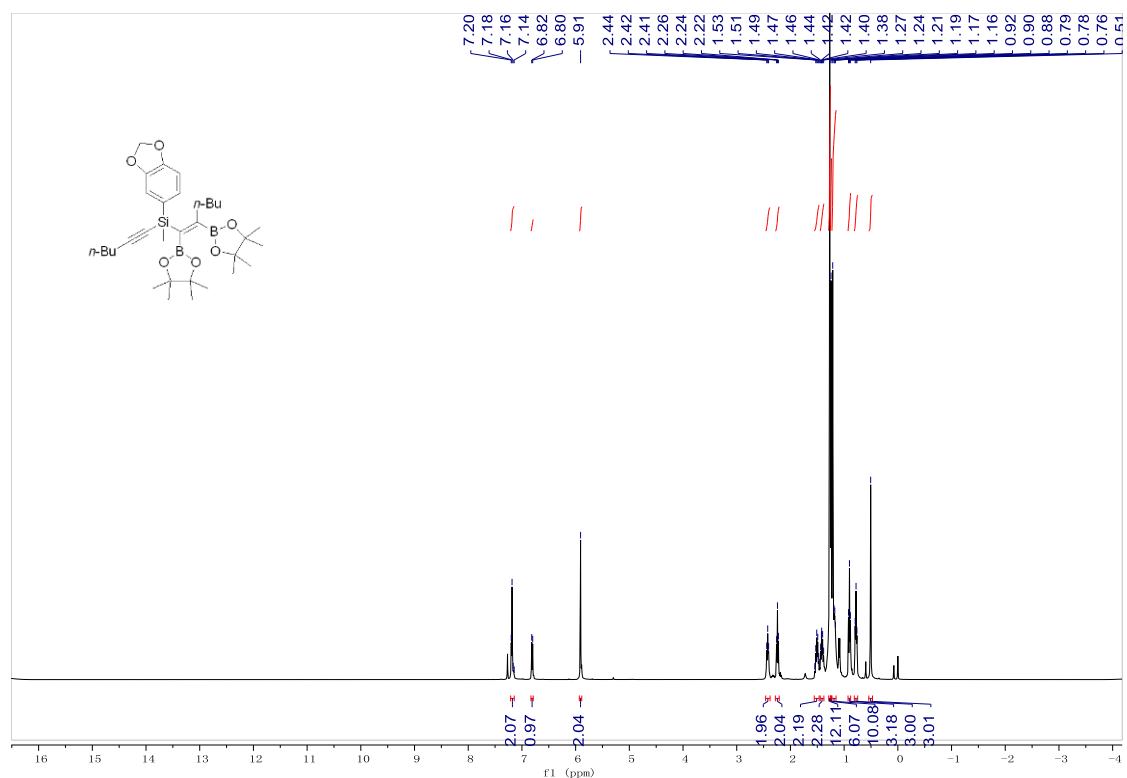

<sup>13</sup>C NMR of **3j**

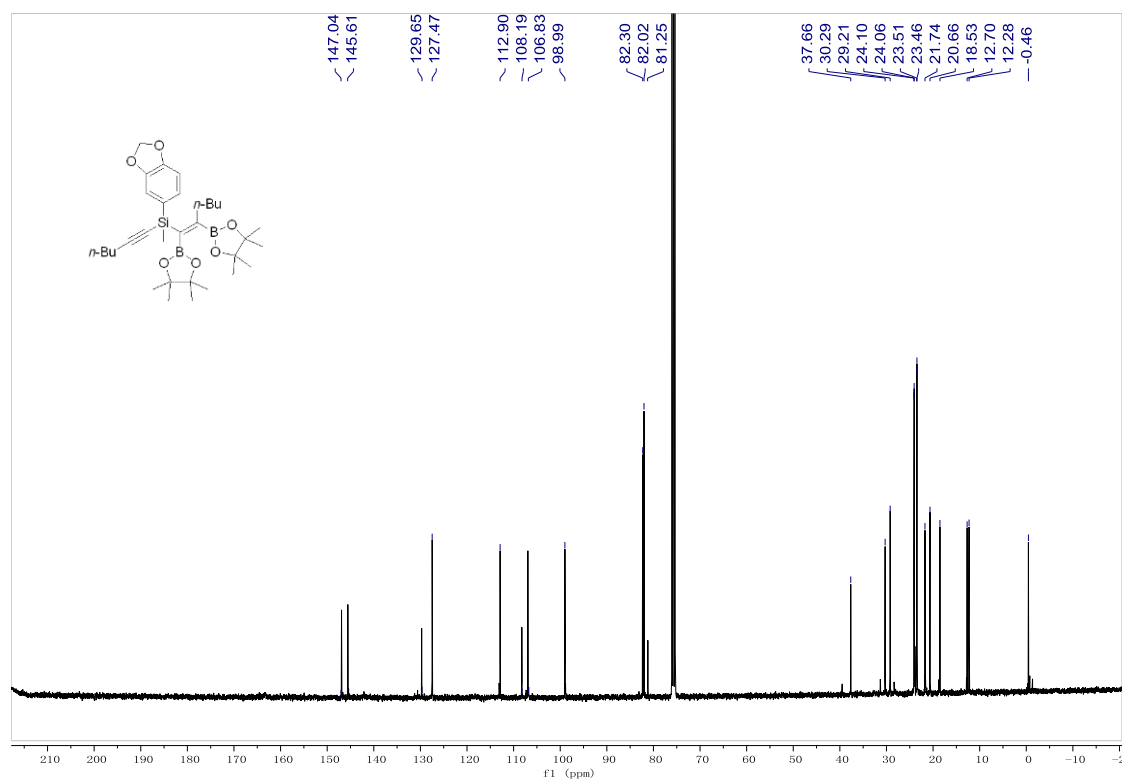

<sup>1</sup>H NMR of **3k**

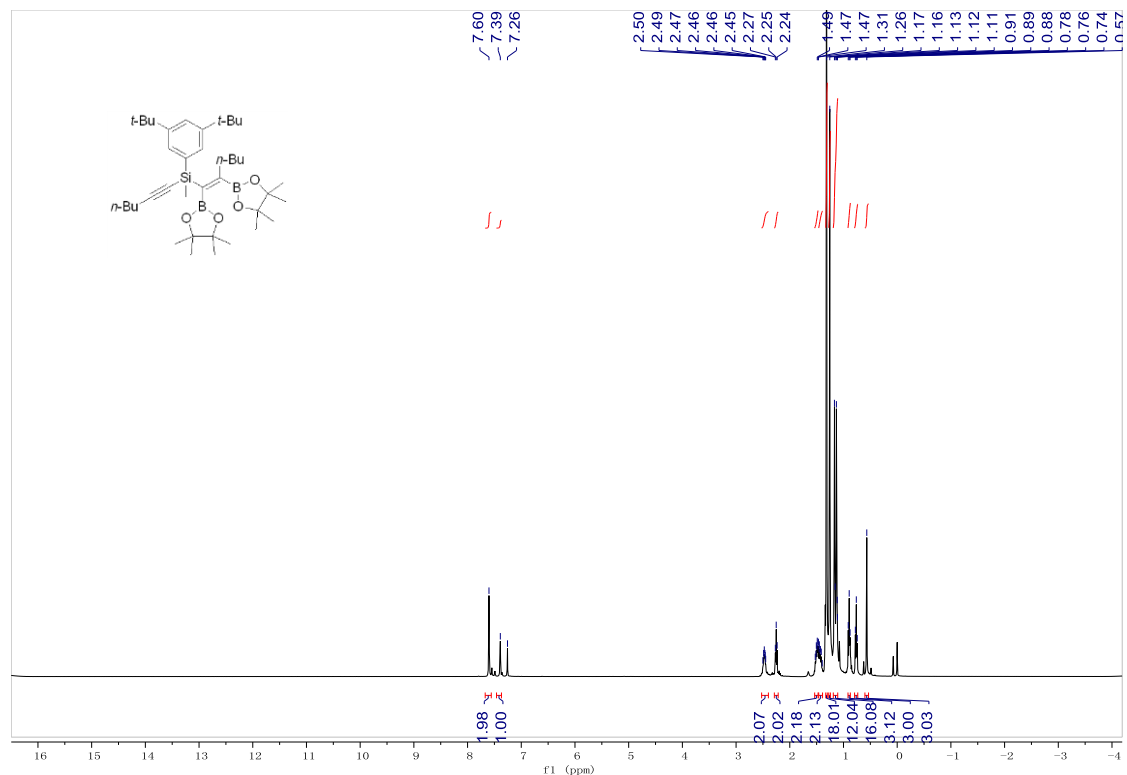

<sup>13</sup>C NMR of **3k**

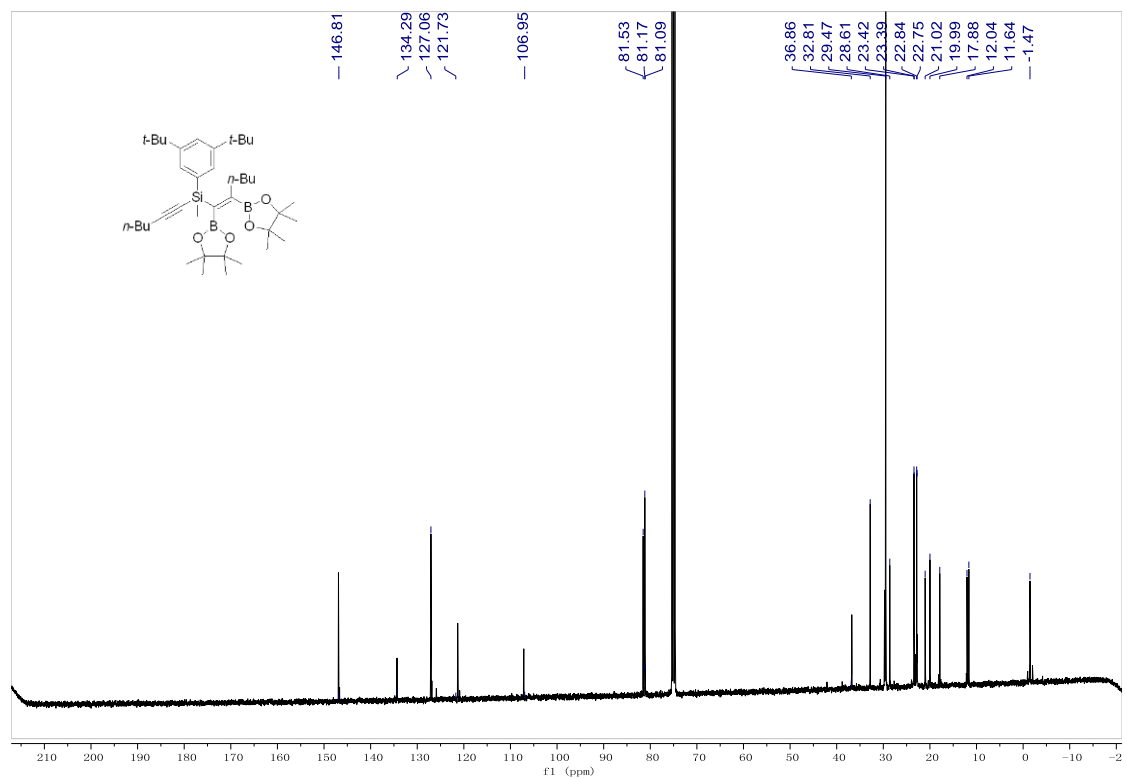



<sup>1</sup>H NMR of **31**

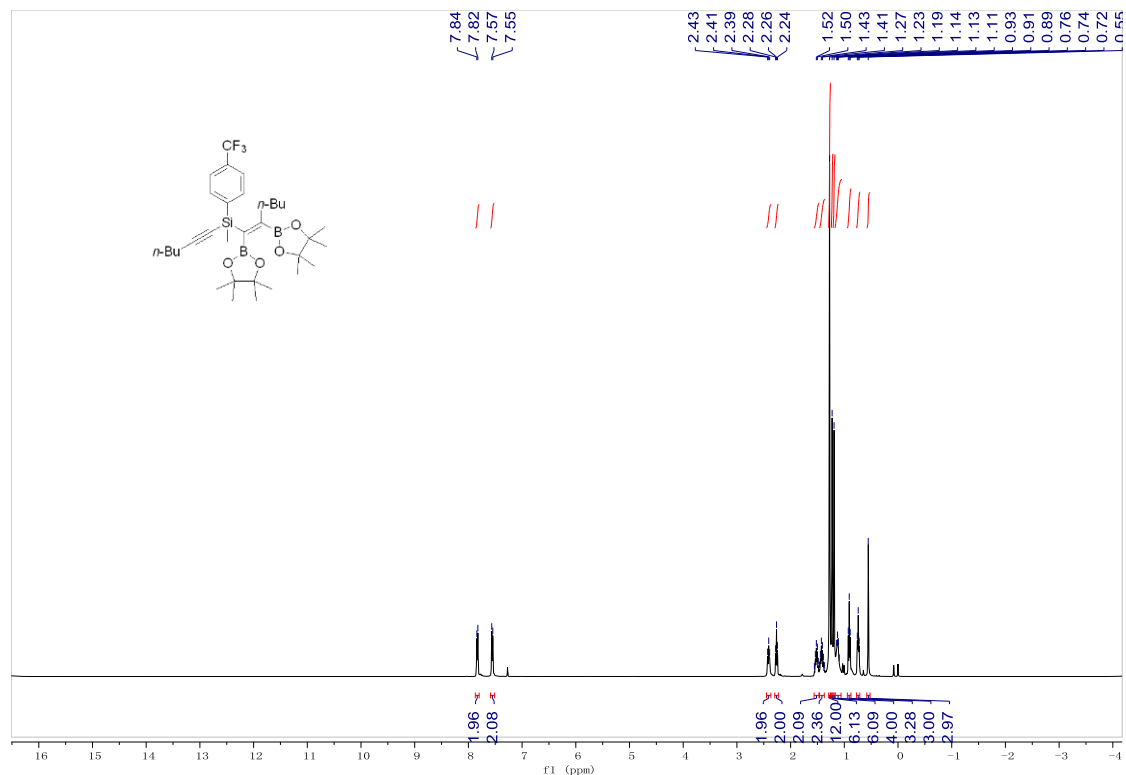

<sup>13</sup>C NMR of **31**

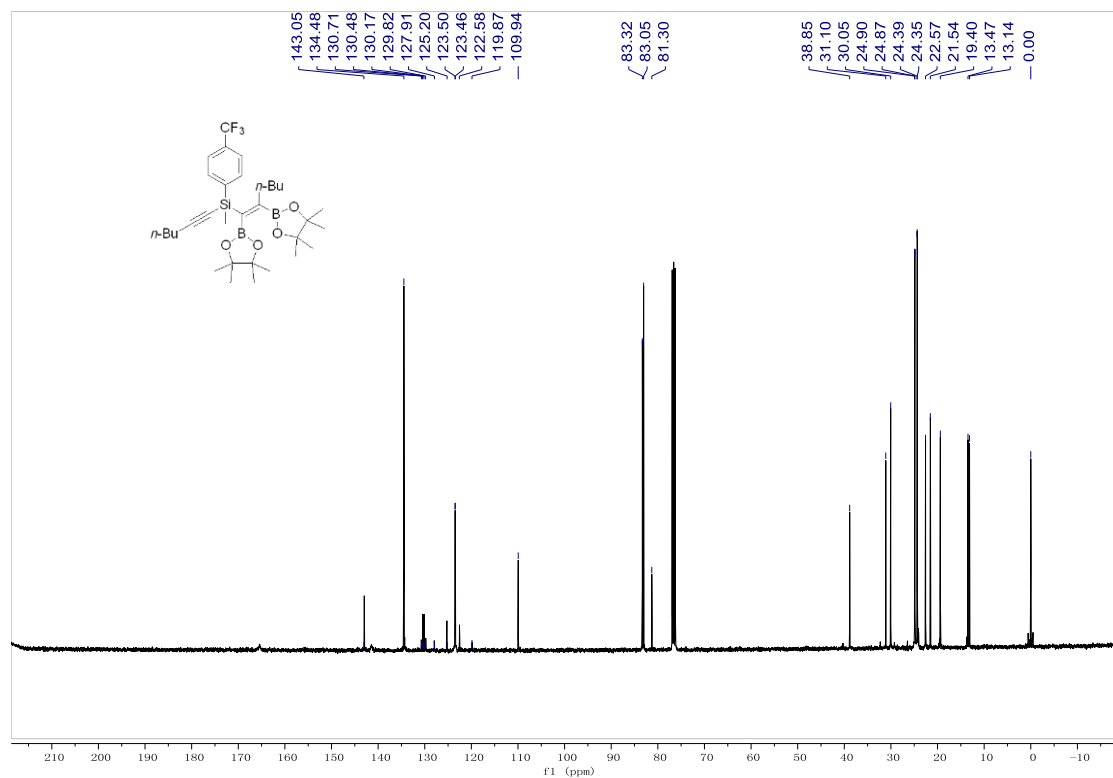

### $^1\text{H}$ NMR of **3m**

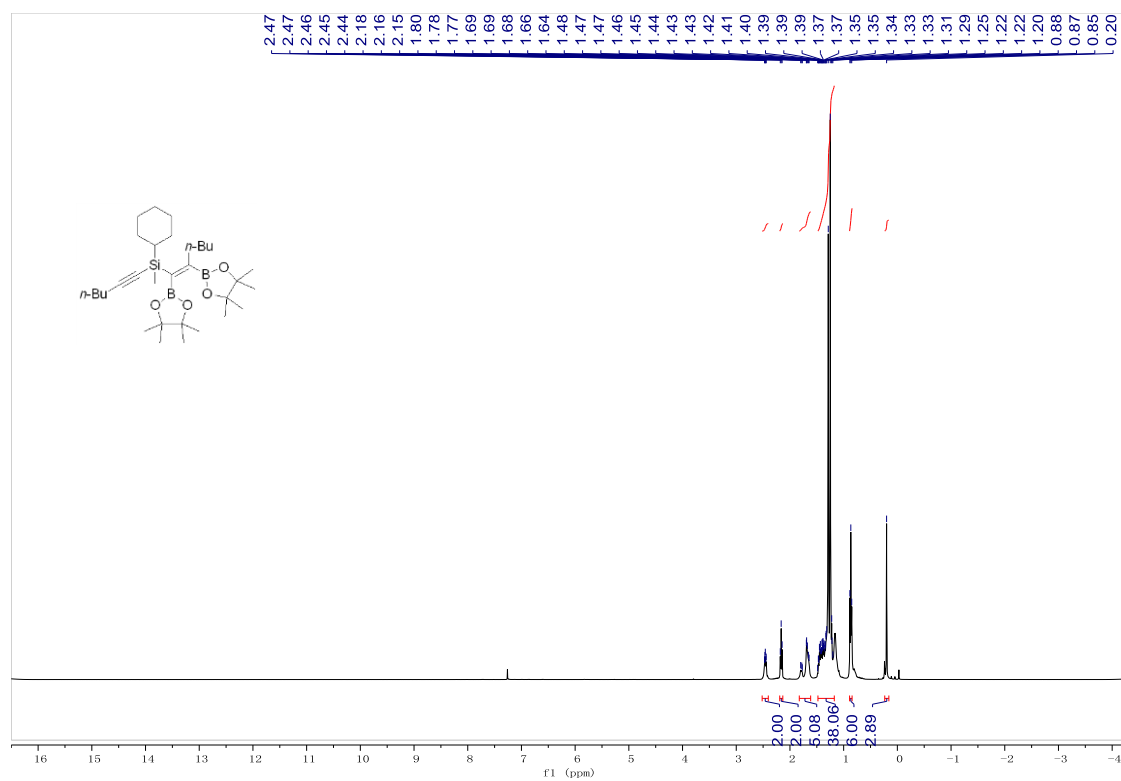

### $^{13}\text{C}$ NMR of **3m**

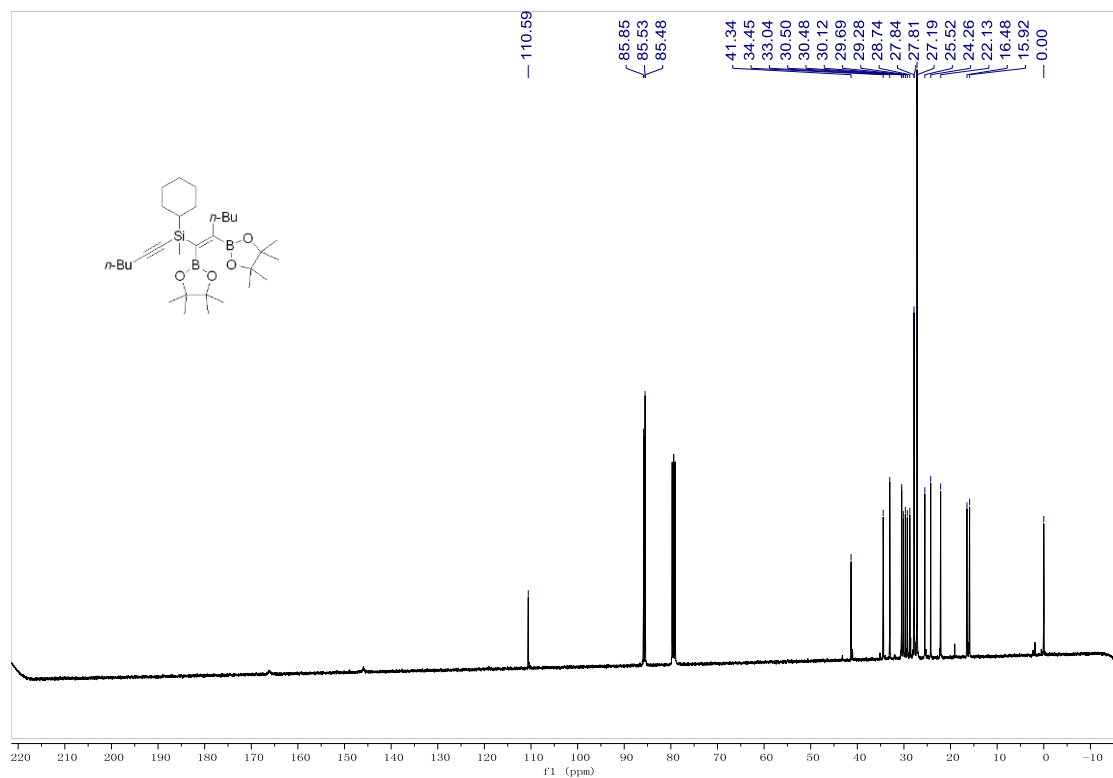

### <sup>1</sup>H NMR of **3n**

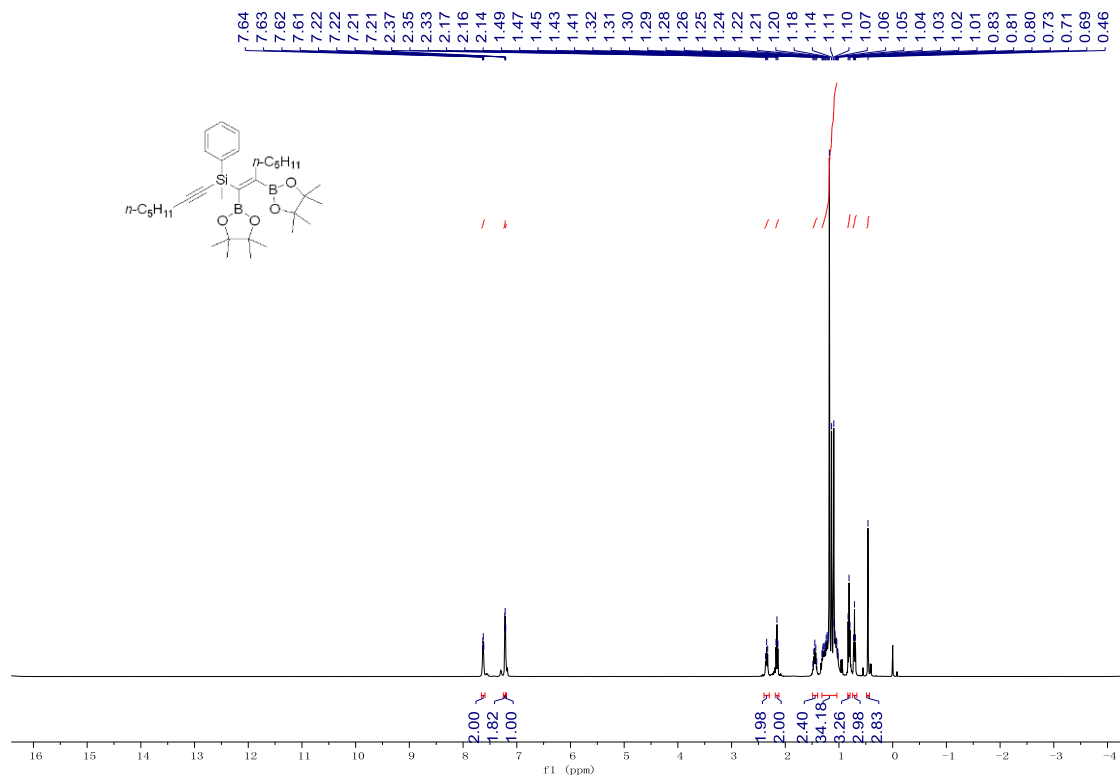

### <sup>13</sup>C NMR of **3n**

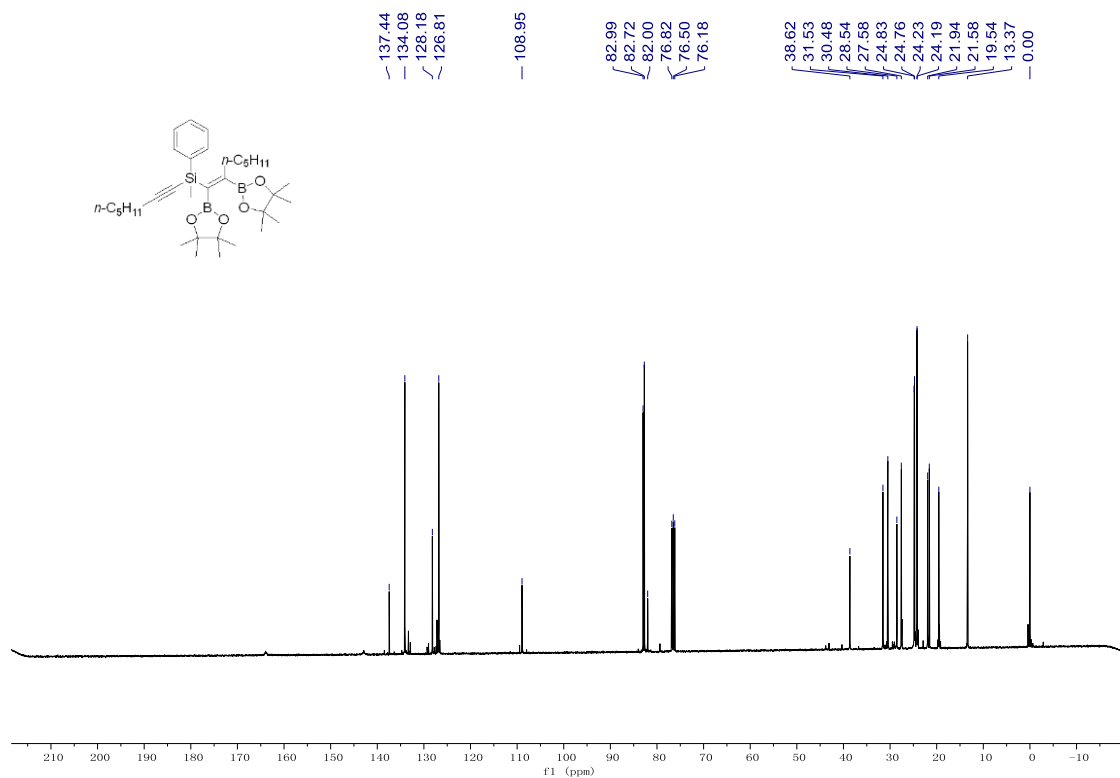

<sup>1</sup>H NMR of **30**

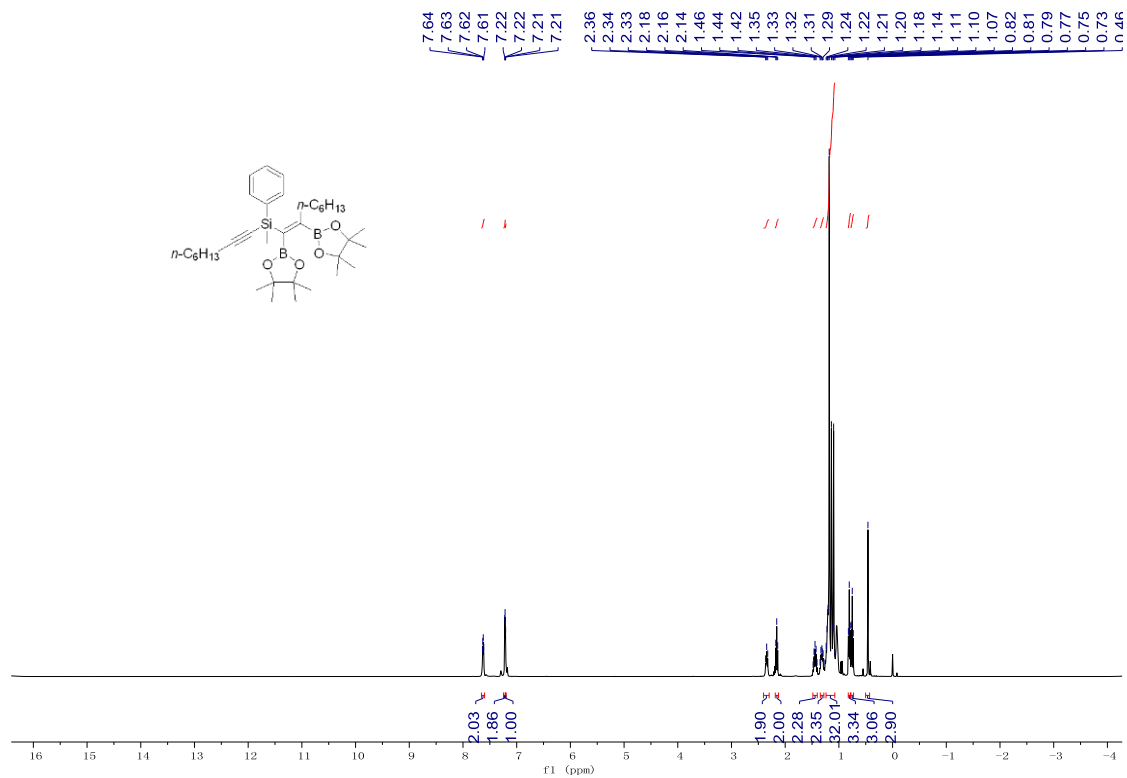

<sup>13</sup>C NMR of **30**

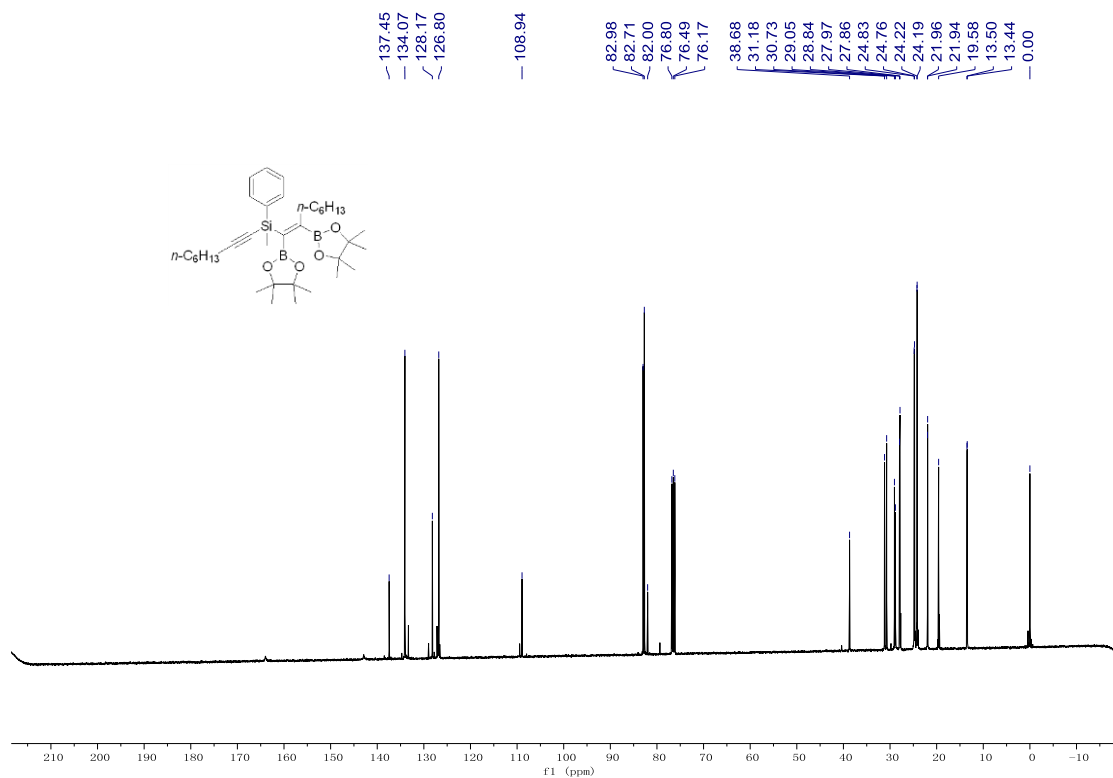

### $^1\text{H}$ NMR of **3p**

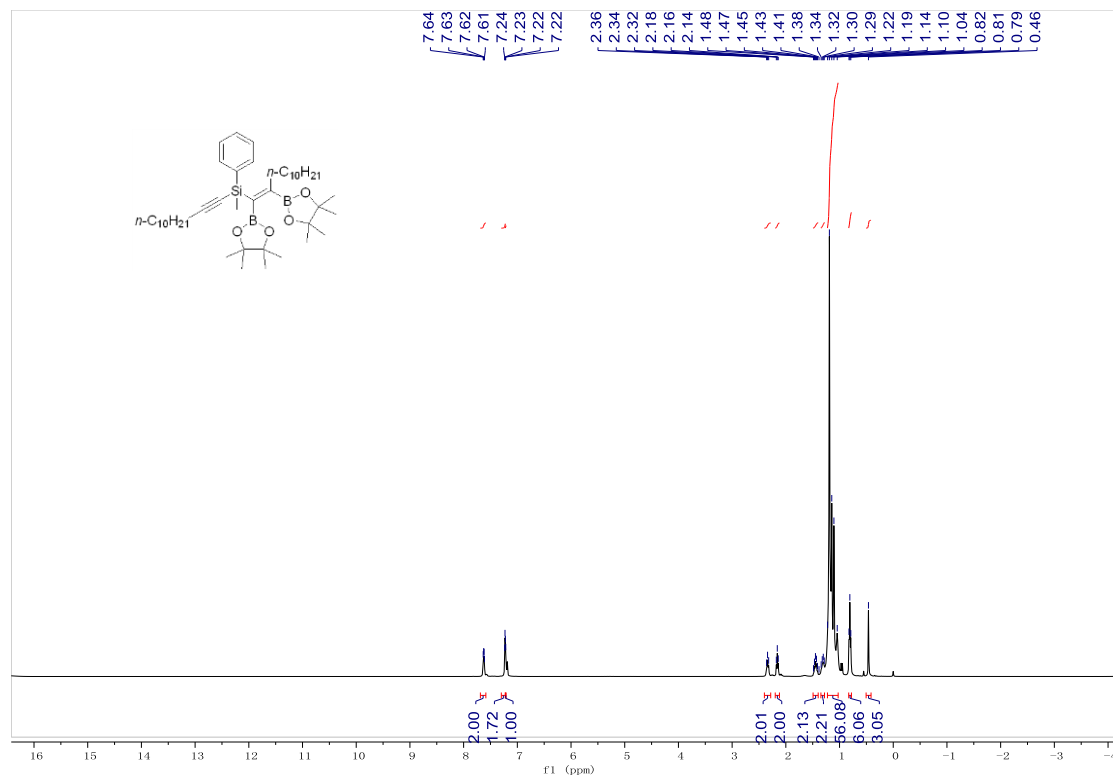

### $^{13}\text{C}$ NMR of **3p**

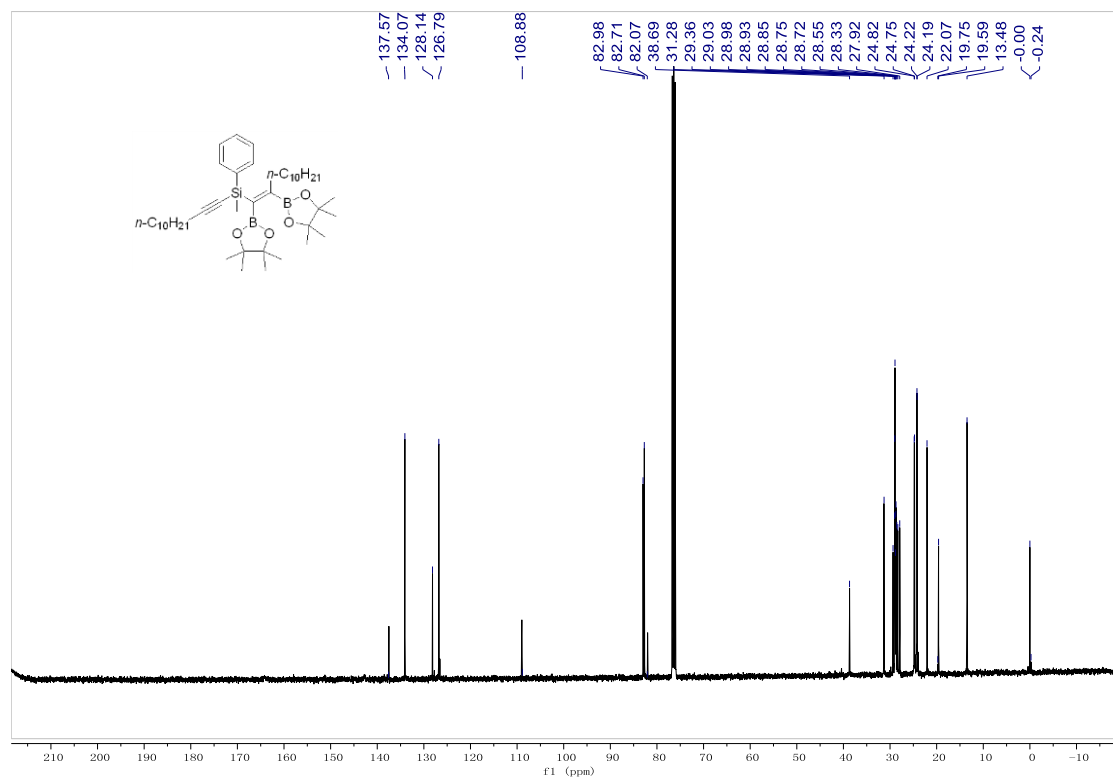

### $^1\text{H}$ NMR of **3q**

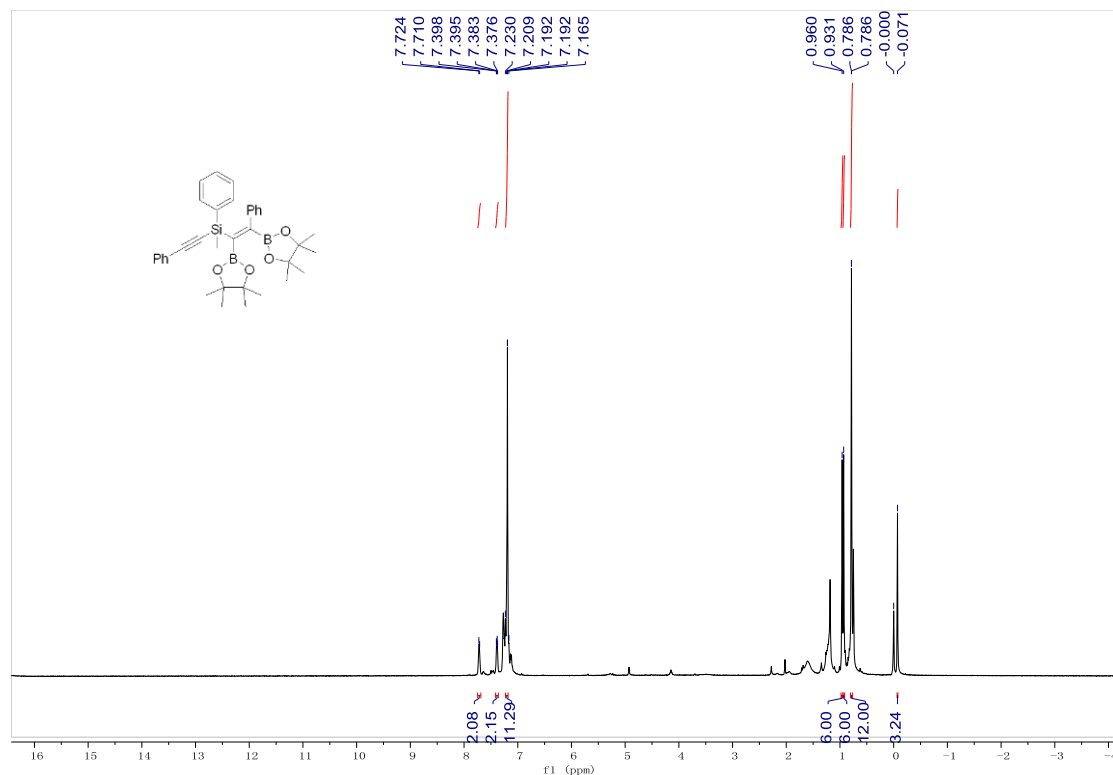

### $^{13}\text{C}$ NMR of **3q**

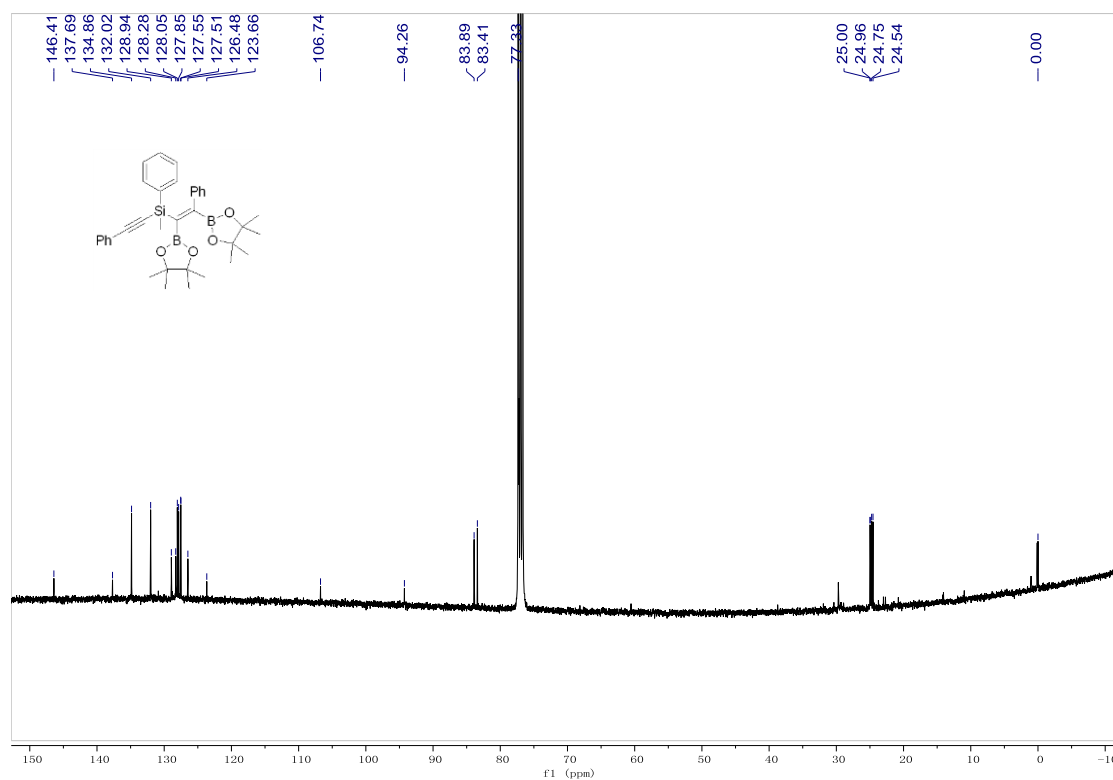

<sup>1</sup>H NMR of **3r**

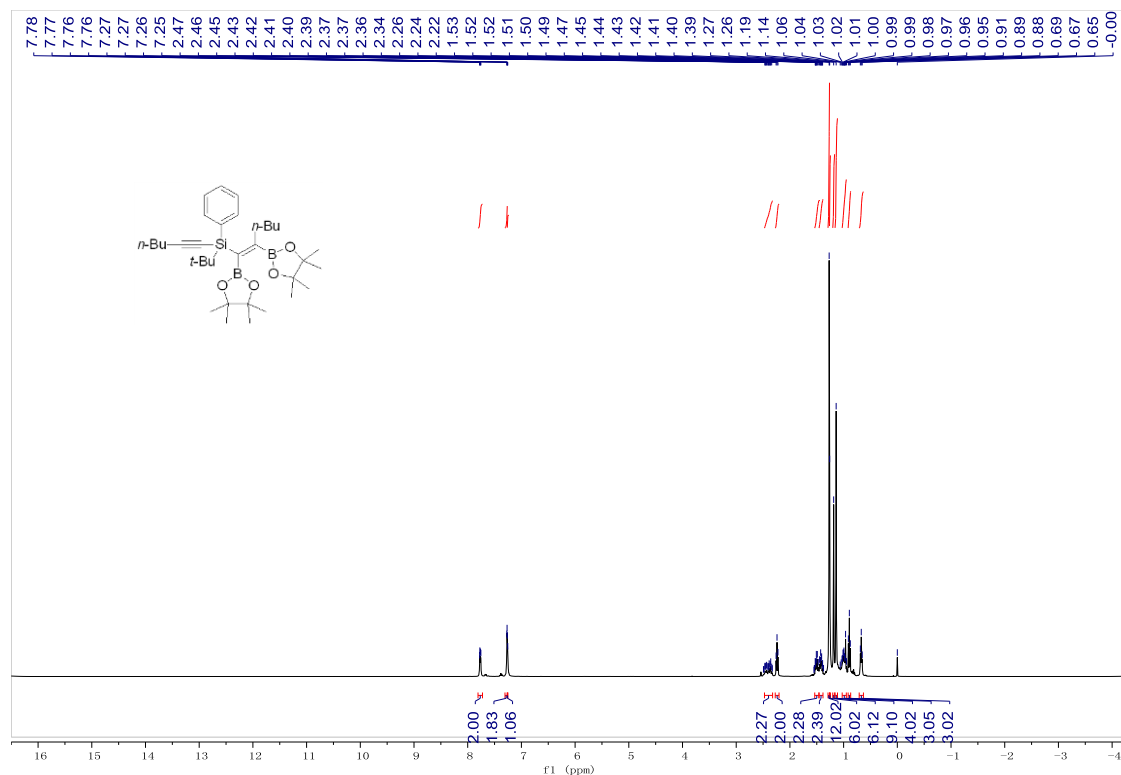

<sup>13</sup>C NMR of **3r**

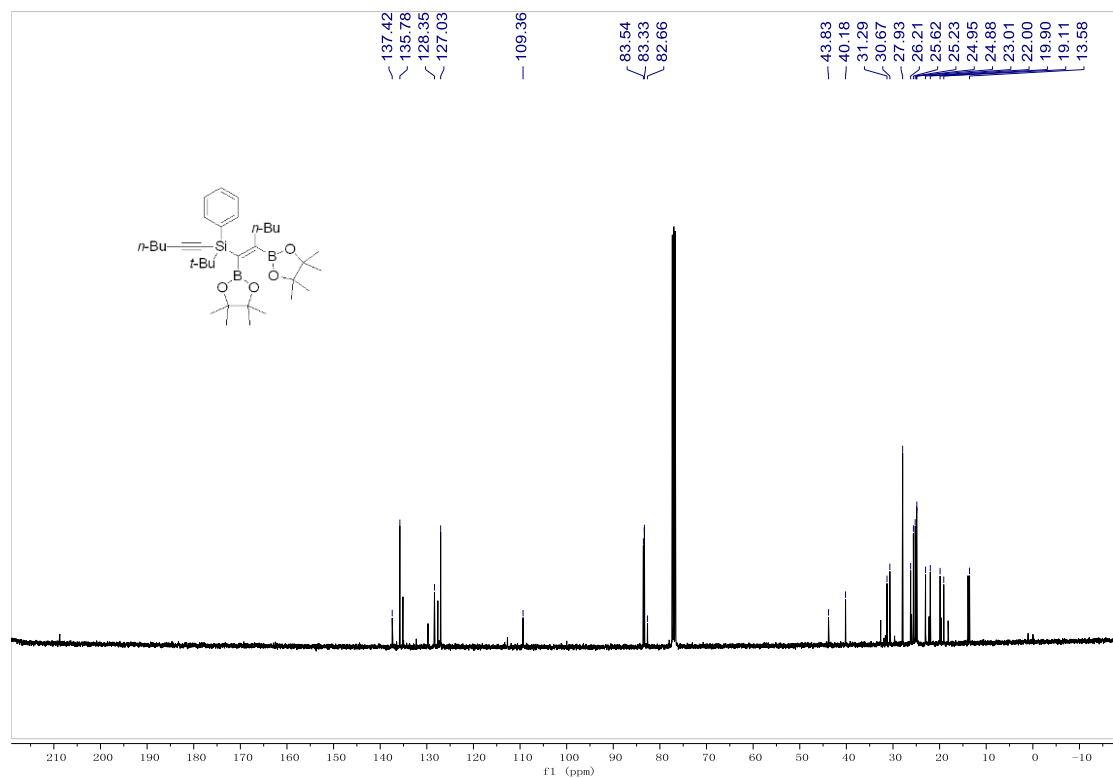

### $^1\text{H}$ NMR of **3s**

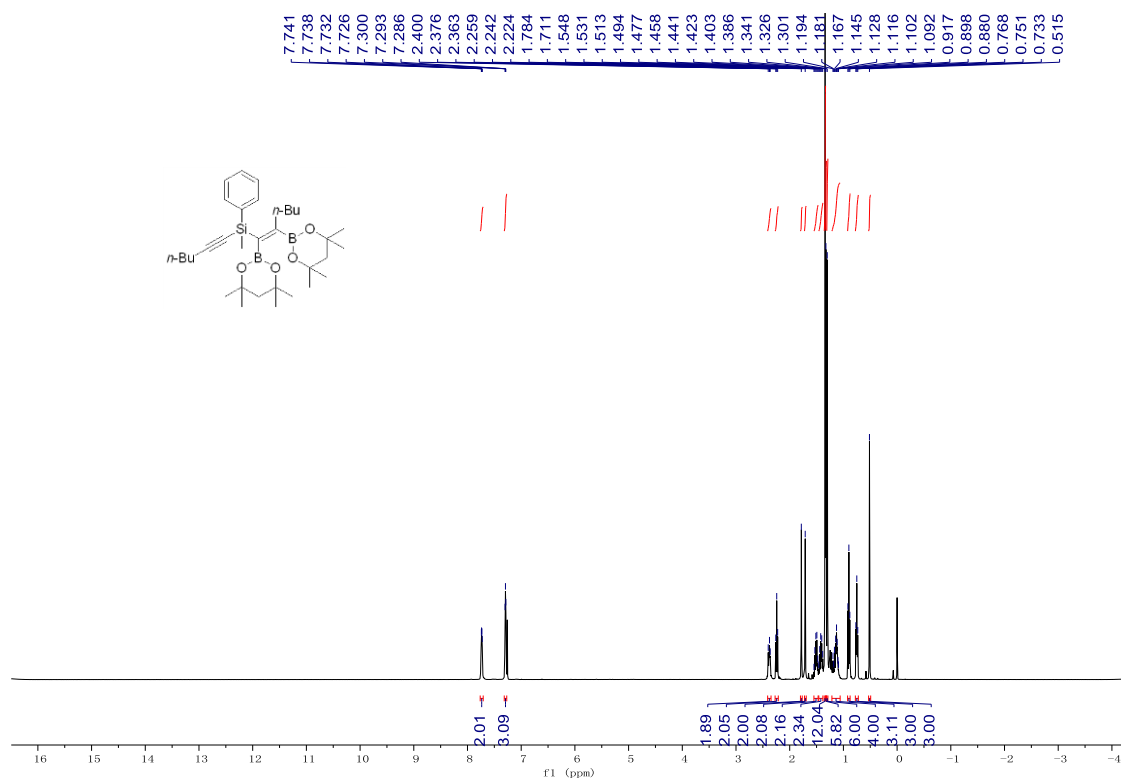

### $^{13}\text{C}$ NMR of **3s**

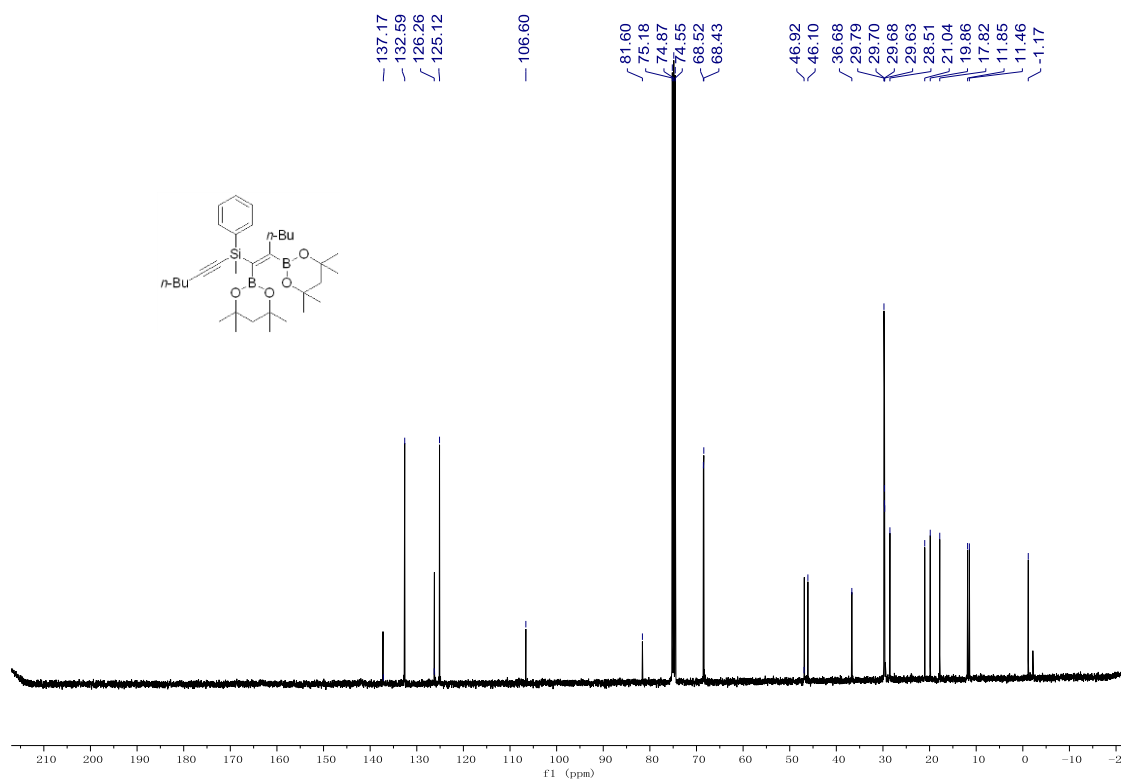



# HPLC Spectra

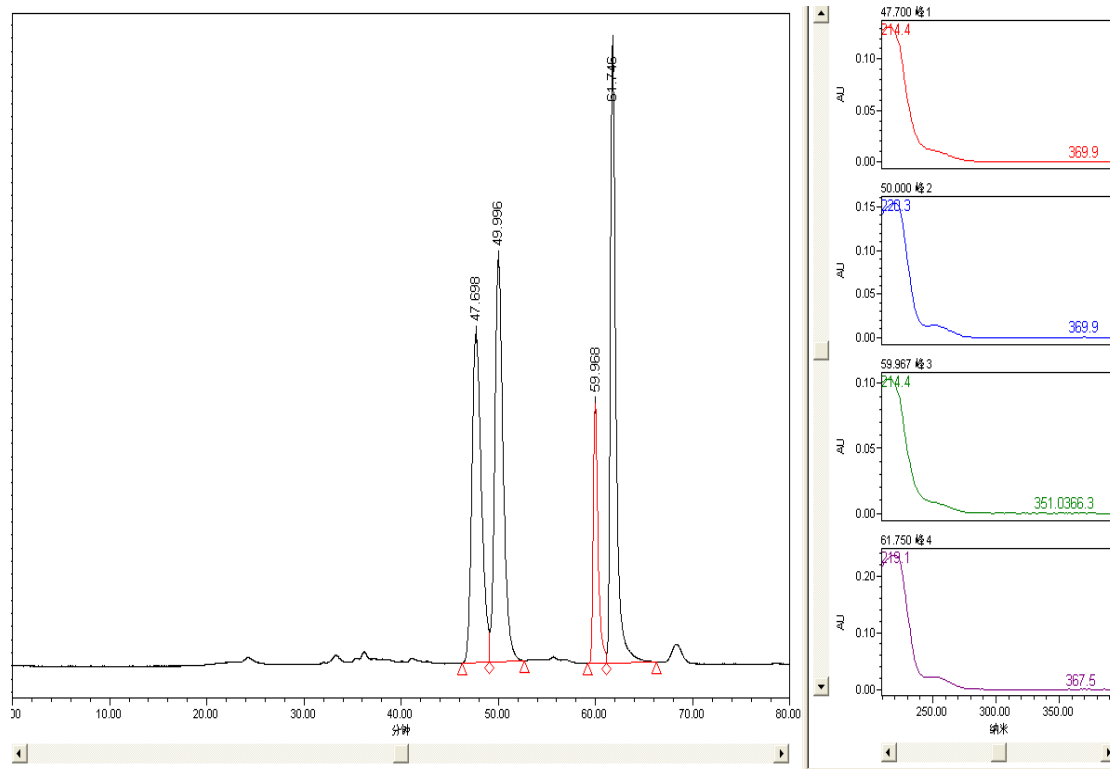

| Peak | RetTime/min | Area% |
|------|-------------|-------|
| 1    | 47.698      | 72    |
| 2    | 59.968      | 28    |

| Peak | RetTime/min | Area% |
|------|-------------|-------|
| 3    | 49.996      | 50    |
| 4    | 61.746      | 50    |

# Computational studies by DFT

## I. A proposed catalytic cycles for the model reaction system

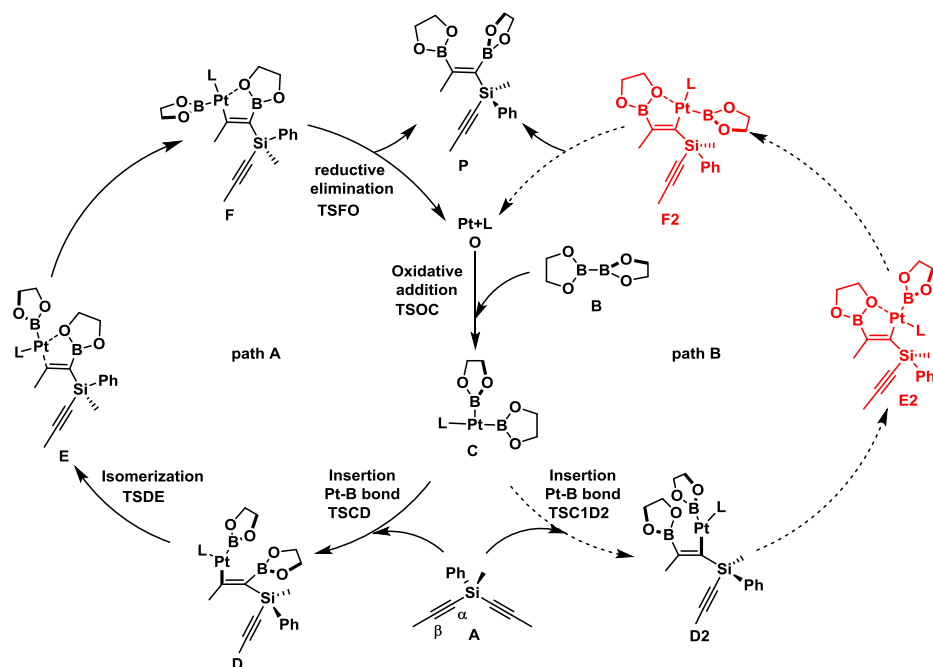

## II. Calculated Potential Energy Surface

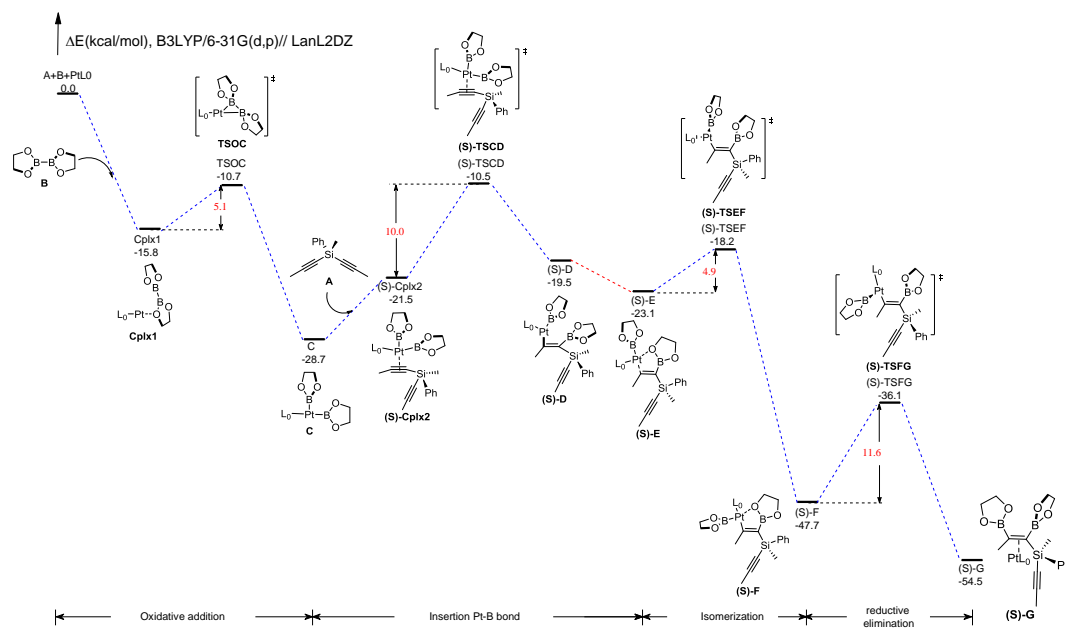

**Figure S1.** The energy profile [kcal/mol] for P-ligated Pt Catalyst [PtL0] of reaction. The energy of A, B and P-ligated Pt complex [PtL0] is set to be relative zero reference.

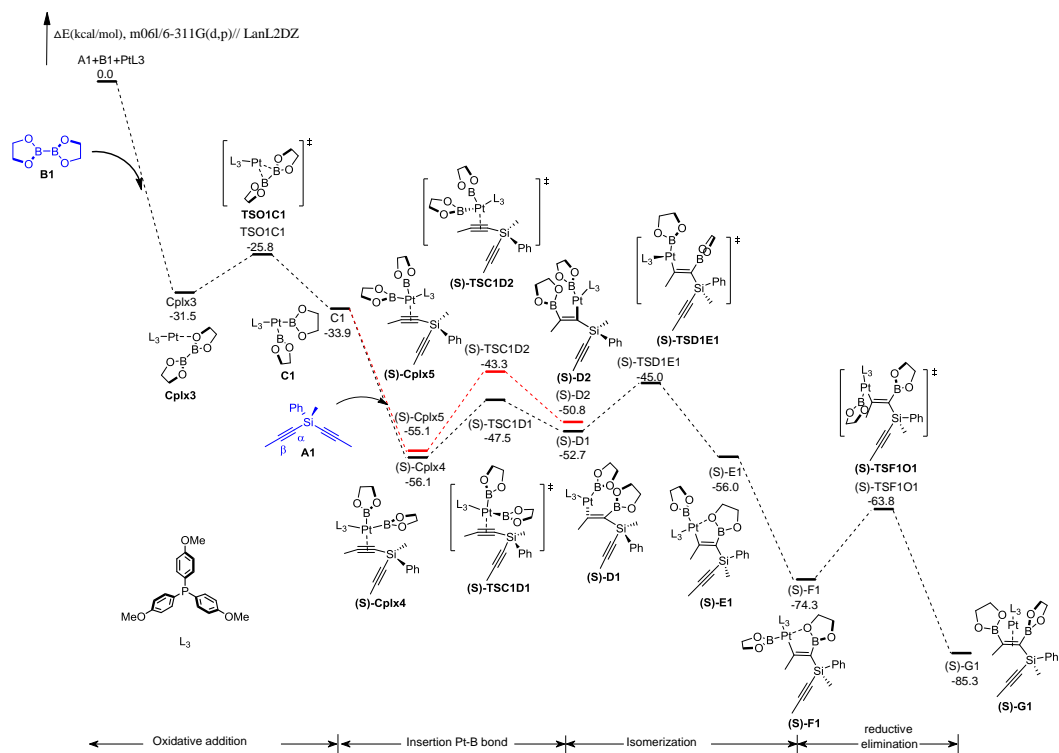

**Figure S2.** The energy profile [kcal/mol] for P-ligated Pt Catalyst [PtL3] of reaction. The energy of A1, B1 and P-ligated Pt complex [PtL3] is set to be relative zero reference.

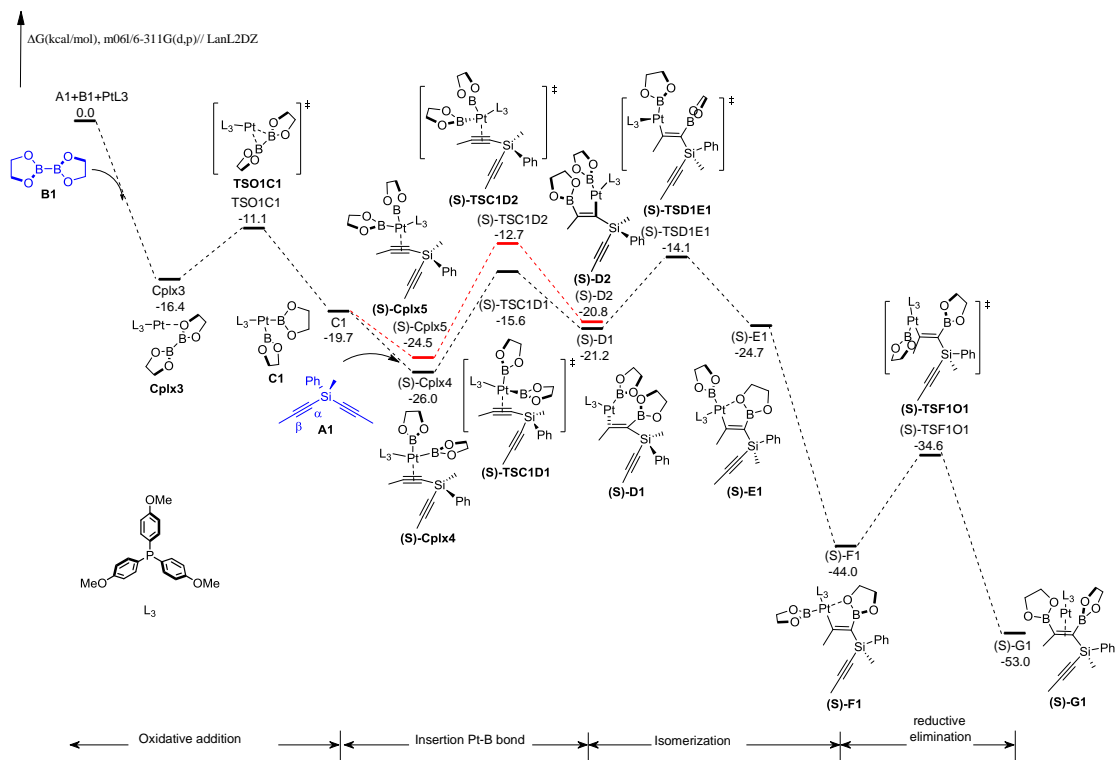

**Figure S3.** The free-energy profile [kcal/mol] for P-ligated Pt Catalyst [PtL3] of reaction. The free-energy of A1, B1 and P-ligated Pt complex [PtL3] is set to be relative zero reference.

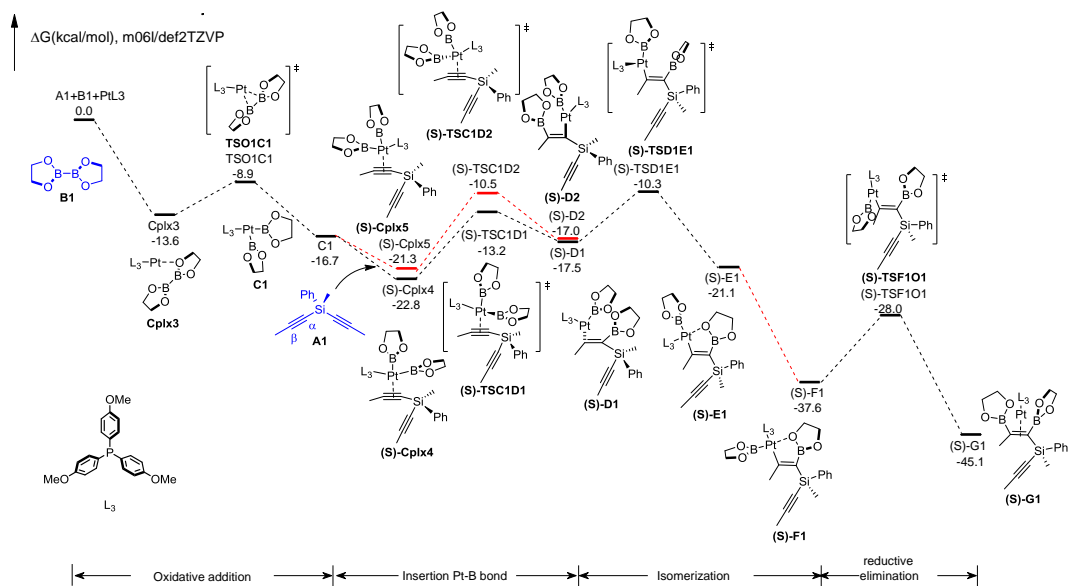

**Figure S4.** The single point energy profile [kcal/mol] for P-ligated Pt Catalyst **[PtL3]** of reaction. The single point energy of **A1**, **B1** and P-ligated Pt complex **[PtL3]** is set to be relative zero reference.

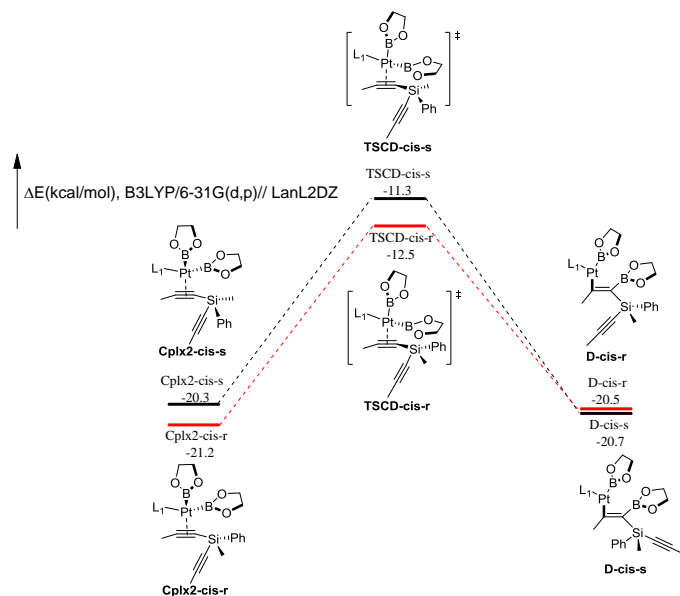

**Figure S5.** The energy profile [kcal/mol] for P-ligated Pt Catalyst **[PtL1]** of reaction. The energy of **A**, **B** and P-ligated Pt complex **[PtL1]** is set to be relative zero reference.

### III. Calculated energy parameters

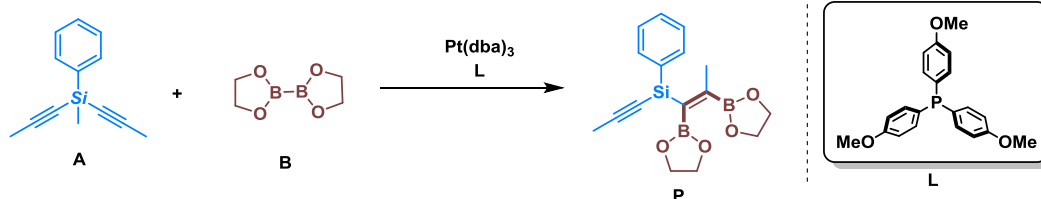

**Table S9.** Reaction parameters for Mono-Lateral diboration of methyl(phenyl)di(prop-1-yn-1-yl)silane **A** with 2,2'-bi(1,3,2-dioxaborolane) **B** Catalyzed by P-ligated Pt Catalyst [**PtL0**] Calculated at B3LYP/LANL2DZ(Pt), 6-31G(d,p) (C, H, P, O, B, Si) level of theory at 298.15 K in gas phase.<sup>[a,b]</sup>

| System <sup>[c]</sup> | $\Delta E^{[d]}$ | $\Delta H^{[d]}$ | $\Delta S^{[e]}$ | $\Delta G^{[d]}$ |
|-----------------------|------------------|------------------|------------------|------------------|
| <b>Cplx1</b>          | -15.8            | -15.5            | -45.5            | -2.0             |
| <b>TSOC</b>           | -10.7            | -10.7            | -49.6            | 4.0              |
| <b>C</b>              | -28.7            | -28.1            | -41.0            | -15.9            |
| <b>(S)-Cplx2</b>      | -21.5            | -20.9            | -97.9            | 8.3              |
| <b>(S)-TSCD</b>       | -10.5            | -10.7            | -103.4           | 20.1             |
| <b>(S)-D</b>          | -19.5            | -19.4            | -98.7            | 10.0             |
| <b>(S)-E</b>          | -23.1            | -23.4            | -103.9           | 7.5              |
| <b>(S)-TSEF</b>       | -18.2            | -19.3            | -107.2           | 12.7             |
| <b>(S)-F</b>          | -47.7            | -48.0            | -102.4           | -17.5            |
| <b>(S)-TSFO</b>       | -36.1            | -36.3            | -97.2            | -7.4             |
| <b>(S)-G</b>          | -54.5            | -54.8            | -105.2           | -23.4            |

[a] Basis set (BS) refers to the standard 6-31G(d,p) basis for C, H, P, O, B and Si atoms and LANL2DZ valence basis set in combination with the corresponding effective core potential for Pt. [b] Relative activation energy and reaction parameters were calculated based on those of free **A+B + PdL0**. [c] Parameters for all the transition state (TSs) should read as those with double dagger like  $\Delta E^\ddagger$ ,  $\Delta H^\ddagger$ ,  $\Delta S^\ddagger$ , and  $\Delta G^\ddagger$ . [d] In kcal/mol. [e] In kcal/(mol K).

**Table S10.** Reaction parameters for Mono-Lateral diboration of methyl(phenyl)di(prop-1-yn-1-yl)silane **A1** with 2,2'-bi(1,3,2-dioxaborolane) **B1** Catalyzed by P-ligated Pt Catalyst [**PtL3**] Calculated at M06L/LANL2DZ(Pt), 6-311G(d,p) (C, H, P, O, B, Si) level of theory at 298.15 K in gas phase. <sup>[a,b]</sup>

| System <sup>[c]</sup> | $\Delta E^{[d]}$ | $\Delta H^{[d]}$ | $\Delta S^{[e]}$ | $\Delta G^{[d]}$ |
|-----------------------|------------------|------------------|------------------|------------------|
| <b>Cplx3</b>          | -31.5            | -31.4            | -50.4            | -16.4            |
| <b>TSO1C1</b>         | -25.8            | -25.8            | -49.4            | -11.1            |
| <b>C1</b>             | -33.9            | -33.5            | -46.2            | -19.7            |
| <b>(S)-Cplx4</b>      | -56.1            | -55.8            | -100.0           | -26.0            |
| <b>(S)-TSC1D1</b>     | -47.5            | -48.0            | -108.6           | -15.6            |
| <b>(S)-D1</b>         | -52.7            | -53.3            | -107.7           | -21.2            |
| <b>(S)-Cplx5</b>      | -55.1            | -55.1            | -102.5           | -24.5            |
| <b>(S)-TSC1D2</b>     | -43.3            | -43.7            | -103.8           | -12.7            |
| <b>(S)-D2</b>         | -50.8            | -50.9            | -101.0           | -20.8            |
| <b>(S)-TSD1E1</b>     | -45.0            | -45.6            | -105.3           | -14.1            |
| <b>(S)-E1</b>         | -56.0            | -56.6            | -107.0           | -24.7            |
| <b>(S)-F1</b>         | -74.3            | -74.7            | -103.0           | -44.0            |
| <b>(S)-TSF1O1</b>     | -63.8            | -64.1            | -98.8            | -34.6            |
| <b>(S)-G1</b>         | -85.3            | -86.1            | -111.0           | -53.0            |
| <b>(S)-P1</b>         | -43.3            | -44.2            | -55.0            | -27.8            |

[a] Basis set (BS) refers to the standard 6-311G(d,p) basis for C, H, P, O, B and Si atoms and LANL2DZ valence basis set in combination with the corresponding effective core potential for Pt. [b] Relative activation energy and reaction parameters were calculated based on those of free **A1+B1 + PdL3**. [c] Parameters for all the transition state (TSs) should read as those with double dagger like  $\Delta E^\ddagger$ ,  $\Delta H^\ddagger$ ,  $\Delta S^\ddagger$ , and  $\Delta G^\ddagger$ . [d] In kcal/mol. [e] In kcal/(mol K).

**Table S11.** Reaction parameters for Mono-Lateral diboration of methyl(phenyl)di(prop-1-yn-1-yl)silane **A1** with 2,2'-bi(1,3,2-dioxaborolane) **B1** Catalyzed by P-ligated Pt Catalyst [**PtL3**] Calculated at M06L/ def2TZVP (Pt, C, H, P, O, B, Si) level of theory at 298.15 K in gas phase. <sup>[a,b]</sup>

| System <sup>[c]</sup> | $\Delta E^{[d]}$ | $\Delta H^{[d]}$ | $\Delta S^{[e]}$ | $\Delta G^{[d]}$ |
|-----------------------|------------------|------------------|------------------|------------------|
| <b>Cplx3</b>          | -28.1            | -28.6            | -50.4            | -13.6            |
| <b>TSO1C1</b>         | -23.0            | -23.6            | -49.4            | -8.9             |
| <b>C1</b>             | -29.9            | -30.5            | -46.2            | -16.7            |
| <b>(S)-Cplx4</b>      | -51.4            | -52.6            | -100.0           | -22.8            |
| <b>(S)-TSC1D1</b>     | -44.5            | -45.6            | -108.6           | -13.2            |
| <b>(S)-D1</b>         | -48.4            | -49.6            | -107.7           | -17.5            |
| <b>(S)-Cplx5</b>      | -50.7            | -51.9            | -102.5           | -21.3            |
| <b>(S)-TSC1D2</b>     | -40.2            | -41.4            | -103.8           | -10.5            |
| <b>(S)-D2</b>         | -45.9            | -47.1            | -101.0           | -17.0            |
| <b>(S)-TSD1E1</b>     | -40.5            | -41.7            | -105.3           | -10.3            |
| <b>(S)-E1</b>         | -51.8            | -53.0            | -107.0           | -21.1            |
| <b>(S)-F1</b>         | -67.1            | -68.3            | -103.0           | -37.6            |
| <b>(S)-TSF1O1</b>     | -56.3            | -57.5            | -98.8            | -28.0            |
| <b>(S)-G1</b>         | -77.0            | -78.1            | -111.0           | -45.1            |
| <b>(S)-P1</b>         | -39.2            | -39.8            | -55.0            | -23.4            |

[a] Basis set (BS) refers to def2TZVP basis for C, H, P, O, B, Si and Pt atoms [b] Relative activation energy and reaction parameters were calculated based on those of free **A1+B1 + PdL3**. [c] Parameters for all the transition state (TSs) should read as those with double dagger like  $\Delta E^\ddagger$ ,  $\Delta H^\ddagger$ ,  $\Delta S^\ddagger$ , and  $\Delta G^\ddagger$ . [d] In kcal/mol. [e] In kcal/(mol K).

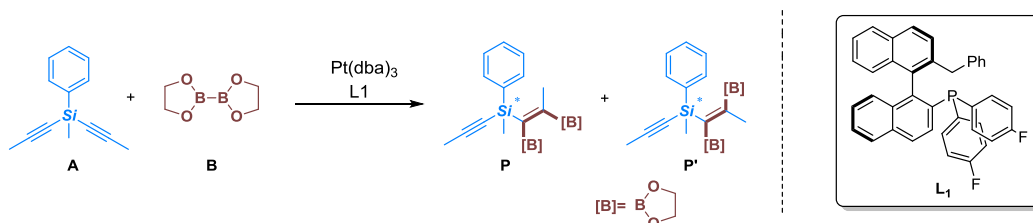

**Table S12.** Reaction parameters for Mono-Lateral diboration of methyl(phenyl)di(prop-1-yn-1-yl)silane **A** with 2,2'-bi(1,3,2-dioxaborolane) **B** Catalyzed by P-ligated Pt Catalyst [**PtL1**] Calculated at B3LYP/LANL2DZ(Pt), 6-31G(d,p) (C, H, P, O, B, F, Si) level of theory at 298.15 K in gas phase. <sup>[a,b]</sup>

| System <sup>[c]</sup> | $\Delta E^{[d]}$ | $\Delta H^{[d]}$ | $\Delta S^{[e]}$ | $\Delta G^{[d]}$ |
|-----------------------|------------------|------------------|------------------|------------------|
| <b>cplx2-cis-s</b>    | -20.3            | -19.8            | -102.0           | 10.6             |
| <b>TSCD-cis-s</b>     | -11.3            | -11.4            | -110.0           | 21.4             |
| <b>D-cis-s</b>        | -20.8            | -20.6            | -100.6           | 9.4              |
| <b>cplx2-cis-r</b>    | -21.2            | -20.8            | -103.0           | 9.9              |
| <b>TSCD-cis-r</b>     | -12.5            | -12.7            | -108.9           | 19.8             |
| <b>D-cis-r</b>        | -20.5            | -20.5            | -104.6           | 10.7             |
| <b>F-cis-s</b>        | -46.0            | -46.4            | -106.7           | -14.6            |
| <b>F-cis-r</b>        | -42.8            | -42.6            | -97.0            | -13.7            |
| <b>F-trans-s</b>      | -40.8            | -40.8            | -102.2           | -10.3            |
| <b>F-trans-r</b>      | -39.2            | -39.2            | -102.1           | -8.8             |

[a] Basis set (BS) refers to the standard 6-31G(d,p) basis for C, H, P, O, B, F and Si atoms and LANL2DZ valence basis set in combination with the corresponding effective core potential for Pt. [b] Relative activation energy and reaction parameters were calculated based on those of free **A+B + PdL1**. [c] Parameters for all the transition state (TSs) should read as those with double dagger like  $\Delta E^\ddagger$ ,  $\Delta H^\ddagger$ ,  $\Delta S^\ddagger$ , and  $\Delta G^\ddagger$ . [d] In kcal/mol. [e] In kcal/(mol K).



## IV. Computational Details

All calculations were performed with the Gaussian09 suites of programs<sup>[1]</sup>. The geometries of all stationary points and transition states were optimized by using the M06L functional in conjunction with the standard 6-311G(d,p) basis for all atoms (C, H, O, N, P) except for palladium and iodide, which were described by the LANL2DZ valence basis set in combination with the corresponding effective core potential. We label this basis set combination as BS. Geometries were fully optimized, normally without symmetry constraints. Frequencies calculations were carried out at the same level of theory to verify the stationary points as minima or saddle points. The connectivity of the stationary points to transition state was verified by intrinsic reaction coordinate (IRC) runs or the vibrational mode of the imaginary frequencies. Solvent effects were included with fully optimization calculations at the same level of theory by using the integral equation formalism variant of the polarizable continuum model (IEFPCM) in toluene with those geometries optimized in gas phase as initial structures. The frequencies calculated at M06L/BS level were used to obtain the reported energies as zero-point energy-corrected energies, enthalpies, and free energies.

### References:

[1] Frisch, M., Trucks, G., Schlegel, H., Scuseria, G., Robb, M., Cheeseman, J., Scalmani, G., Barone, V., Mennucci, B., Petersson, G., Nakatsuji, H., Caricato, M., Li, X., Hratchian, H., Izmaylov, A., Bloino, J., Zheng, G., Sonnenberg, J., Hada, M., Ehara, M., Toyota, K., Fukuda, R., Hasegawa, J., Ishida, M., Nakajima, T., Honda, Y., Kitao, O., Nakai, H., Vreven, T., Montgomery, J., Peralta, J., Ogliaro, F., Bearpark, M., Heyd, J., Brothers, E., Kudin, K., Staroverov, V., Kobayashi, R., Normand, J., Raghavachari, K., Rendell, A., Burant, J., Iyengar, S., Tomasi, J., Cossi, M., Rega, N., Millam, J., Klene, M., Knox, J., Cross, J., Bakken, V., Adamo, C., Jaramillo, J., Gomperts, R., Stratmann, R., Yazyev, O., Austin, A., Cammi, R., Pomelli, C., Ochterski, J., Martin, R., Morokuma, K., Zakrzewski, V., Voth, G., Salvador, P., Dannenberg, J., Dapprich, S., Daniels, A., Farkas, Foresman, J., Ortiz, J., Cioslowski, J., Fox, D., 2009. Gaussian 09, Revision C.01, Gaussian Inc Wallingford CT.

## V. Cartesian coordinates of calculated intermediates and transition states

47

O

imaginary frequencies no

E(B3LYP/LanL2DZ(Pd),6-31G(d,p))=-1498.687698

H(B3LYP/LanL2DZ(Pd),6-31G(d,p))=-1498.661112

G(B3LYP/LanL2DZ(Pd),6-31G(d,p))=-1498.748138

|    |             |             |             |
|----|-------------|-------------|-------------|
| P  | 0.00094000  | -0.00367100 | 0.36157500  |
| Pt | -0.00486500 | -0.01187800 | 2.50877500  |
| C  | -1.48185500 | -0.79146200 | -0.39130800 |
| C  | -2.05935900 | -1.89725700 | 0.24610300  |
| C  | -2.05707600 | -0.33842000 | -1.59224700 |
| C  | -3.16793500 | -2.54997500 | -0.29337700 |
| H  | -1.64076800 | -2.23926800 | 1.18859100  |
| C  | -3.16297300 | -0.97763500 | -2.13846500 |
| H  | -1.64260900 | 0.52548900  | -2.10197500 |
| C  | -3.72583200 | -2.08951900 | -1.49357400 |
| H  | -3.58952200 | -3.39974700 | 0.23030700  |
| H  | -3.61481600 | -0.63070000 | -3.06212700 |
| C  | 0.05979300  | 1.67926700  | -0.37963600 |
| C  | 0.75011700  | 1.96236100  | -1.57207800 |
| C  | -0.62392300 | 2.72404700  | 0.25574400  |
| C  | 0.74423300  | 3.24218700  | -2.11259400 |
| H  | 1.30311100  | 1.17868900  | -2.08004300 |
| C  | -0.64024700 | 4.01270600  | -0.27808600 |
| H  | -1.13868100 | 2.52406800  | 1.19144400  |
| C  | 0.04691200  | 4.27672400  | -1.47062000 |
| H  | 1.27797000  | 3.46832900  | -3.03002500 |
| H  | -1.17768900 | 4.79591900  | 0.24324900  |
| C  | 1.43033300  | -0.88991900 | -0.38443700 |
| C  | 1.33031500  | -1.62822800 | -1.57740300 |
| C  | 2.67819400  | -0.81551000 | 0.24830600  |
| C  | 2.44286700  | -2.25842900 | -2.12061200 |
| H  | 0.37450900  | -1.71739000 | -2.08372400 |
| C  | 3.80373200  | -1.44078500 | -0.28856200 |
| H  | 2.76183900  | -0.27052800 | 1.18452800  |
| C  | 3.68842500  | -2.16788600 | -1.48107300 |
| H  | 2.37231800  | -2.83332800 | -3.03832800 |
| H  | 4.75169400  | -1.36366800 | 0.23045800  |
| O  | 0.10350600  | 5.49429400  | -2.07847500 |
| O  | 4.71472900  | -2.82290600 | -2.09168100 |
| O  | -4.80928100 | -2.64254400 | -2.10624300 |

|   |             |             |             |
|---|-------------|-------------|-------------|
| C | 5.99960800  | -2.77650000 | -1.48910400 |
| H | 6.65653100  | -3.35861700 | -2.13709600 |
| H | 6.37805400  | -1.74863700 | -1.42130800 |
| H | 5.99306800  | -3.22337300 | -0.48691500 |
| C | -5.43074500 | -3.76357400 | -1.49512700 |
| H | -6.26314800 | -4.03721200 | -2.14511700 |
| H | -4.74186600 | -4.61389900 | -1.41372000 |
| H | -5.81699200 | -3.51797300 | -0.49781400 |
| C | -0.57617700 | 6.58324500  | -1.47156400 |
| H | -0.40076700 | 7.44467700  | -2.11764300 |
| H | -1.65557900 | 6.39802200  | -1.40176600 |
| H | -0.18331700 | 6.79735600  | -0.46959600 |

28

A

imaginary frequencies no

E(B3LYP/LanL2DZ(Pd),6-31G(d,p))=-793.041914

H(B3LYP/LanL2DZ(Pd),6-31G(d,p))=-793.024016

G(B3LYP/LanL2DZ(Pd),6-31G(d,p))=-793.090745

|    |             |             |             |
|----|-------------|-------------|-------------|
| Si | -0.64935700 | 0.00009100  | 0.65785500  |
| C  | 1.16147800  | -0.00010700 | 0.13164000  |
| C  | 1.86438600  | 1.20466100  | -0.04518400 |
| C  | 1.86392600  | -1.20499800 | -0.04609600 |
| C  | 3.22015100  | 1.20704500  | -0.37561900 |
| H  | 1.34177500  | 2.15181900  | 0.06330600  |
| C  | 3.21969900  | -1.20764400 | -0.37653100 |
| H  | 1.34093500  | -2.15202500 | 0.06167600  |
| C  | 3.90109300  | -0.00037000 | -0.53973500 |
| H  | 3.74371900  | 2.14969500  | -0.51004800 |
| H  | 3.74290700  | -2.15039200 | -0.51167200 |
| H  | 4.95612900  | -0.00046700 | -0.79940100 |
| C  | -0.80634600 | 0.00024300  | 2.53664700  |
| H  | -0.32542500 | 0.88641500  | 2.96314400  |
| H  | -1.85767800 | 0.00041300  | 2.84034500  |
| H  | -0.32568600 | -0.88602500 | 2.96324000  |
| C  | -1.46366100 | 1.49609300  | -0.01289700 |
| C  | -1.99587500 | 2.50089000  | -0.44858800 |
| C  | -1.46393900 | -1.49586800 | -0.01265300 |
| C  | -1.99634100 | -2.50062000 | -0.44822100 |
| C  | -2.63870900 | 3.69773300  | -0.97774800 |
| H  | -3.65884200 | 3.47955600  | -1.31266700 |
| H  | -2.69752300 | 4.48507400  | -0.21805800 |
| H  | -2.08433400 | 4.09806400  | -1.83379000 |
| C  | -2.63948100 | -3.69736900 | -0.97723000 |

|   |             |             |             |
|---|-------------|-------------|-------------|
| H | -2.68184400 | -4.49104900 | -0.22306300 |
| H | -3.66591000 | -3.48315500 | -1.29503100 |
| H | -2.09552100 | -4.08733000 | -1.84466100 |

18

**B**

imaginary frequencies no

E(B3LYP/LanL2DZ(Pd),6-31G(d,p))=-507.874068

H(B3LYP/LanL2DZ(Pd),6-31G(d,p))=-507.863583

G(B3LYP/LanL2DZ(Pd),6-31G(d,p))=-507.912102

|   |             |             |             |
|---|-------------|-------------|-------------|
| B | -0.85167600 | 0.00000700  | -0.00014800 |
| B | 0.85167700  | 0.00001500  | -0.00017800 |
| O | 1.60892500  | 0.99548000  | -0.56837000 |
| O | 1.60873700  | -0.99547000 | 0.56826900  |
| O | -1.60889200 | -0.99543700 | -0.56842200 |
| O | -1.60876300 | 0.99546600  | 0.56830400  |
| C | -2.99722700 | 0.64564700  | 0.42693200  |
| C | -2.99732400 | -0.64560100 | -0.42675200 |
| C | 2.99720400  | -0.64562500 | 0.42700300  |
| C | 2.99734100  | 0.64553200  | -0.42681100 |
| H | -3.52752300 | -1.47338200 | 0.05422900  |
| H | -3.52752500 | 1.47343000  | -0.05393500 |
| H | -3.42679900 | 0.49186600  | 1.42283500  |
| H | -3.42710300 | -0.49181900 | -1.42256400 |
| H | 3.42666700  | -0.49171200 | 1.42293500  |
| H | 3.52758600  | -1.47343900 | -0.05371600 |
| H | 3.42699300  | 0.49159800  | -1.42265600 |
| H | 3.52767600  | 1.47331000  | 0.05402200  |

65

**Cplx1**

imaginary frequencies no

E(B3LYP/LanL2DZ(Pd),6-31G(d,p))=-2006.586983

H(B3LYP/LanL2DZ(Pd),6-31G(d,p))=-2006.549451

G(B3LYP/LanL2DZ(Pd),6-31G(d,p))=-2006.663151

|   |             |             |            |
|---|-------------|-------------|------------|
| P | 0.70089400  | 0.12297700  | 0.07343800 |
| C | 0.59171500  | -0.40725000 | 1.83366400 |
| C | -0.66914100 | -0.71292900 | 2.36554100 |
| C | 1.71443700  | -0.51217700 | 2.67301900 |
| C | -0.81647700 | -1.10243100 | 3.69744900 |
| H | -1.55173200 | -0.65146900 | 1.73505100 |
| C | 1.57968200  | -0.90428700 | 3.99962600 |
| H | 2.70491900  | -0.29462200 | 2.28626300 |
| C | 0.31241300  | -1.20203100 | 4.52149200 |

|    |             |             |             |
|----|-------------|-------------|-------------|
| H  | -1.80679100 | -1.33299300 | 4.07191600  |
| H  | 2.44308200  | -0.99366200 | 4.65111500  |
| C  | 2.49134900  | -0.01989200 | -0.33918600 |
| C  | 3.41849500  | 1.01895800  | -0.14198500 |
| C  | 2.95762200  | -1.22780800 | -0.87476100 |
| C  | 4.76026400  | 0.84987300  | -0.46033800 |
| H  | 3.08917800  | 1.97349000  | 0.25569800  |
| C  | 4.30330800  | -1.41379600 | -1.19423000 |
| H  | 2.24976600  | -2.03265000 | -1.05425600 |
| C  | 5.21321000  | -0.36883000 | -0.98761400 |
| H  | 5.47850900  | 1.65047300  | -0.31561900 |
| H  | 4.62474800  | -2.36226000 | -1.60816600 |
| C  | 0.38886100  | 1.93878800  | 0.13743000  |
| C  | 0.64338600  | 2.72048700  | 1.27904100  |
| C  | -0.11920100 | 2.57647400  | -1.00160000 |
| C  | 0.41099000  | 4.09015200  | 1.27424500  |
| H  | 1.01788100  | 2.25202800  | 2.18404700  |
| C  | -0.35440300 | 3.95326300  | -1.02197000 |
| H  | -0.34736600 | 1.98013900  | -1.88105300 |
| C  | -0.08677400 | 4.71746900  | 0.12158300  |
| H  | 0.60257700  | 4.69777400  | 2.15283800  |
| H  | -0.74517800 | 4.41127000  | -1.92302700 |
| O  | 6.54469900  | -0.43311300 | -1.27029800 |
| O  | -0.28226700 | 6.06249200  | 0.21872800  |
| O  | 0.28583000  | -1.58065700 | 5.83100500  |
| C  | -0.77774200 | 6.75584500  | -0.91673900 |
| H  | -0.84878200 | 7.80384100  | -0.62184100 |
| H  | -0.09822700 | 6.66708000  | -1.77378800 |
| H  | -1.77221200 | 6.39539900  | -1.20951600 |
| C  | -0.96730200 | -1.90738900 | 6.41200100  |
| H  | -0.75670100 | -2.18116600 | 7.44704700  |
| H  | -1.65597900 | -1.05293300 | 6.39814100  |
| H  | -1.44097100 | -2.75645300 | 5.90312700  |
| C  | 7.05902800  | -1.63668300 | -1.81974700 |
| H  | 8.12636200  | -1.46720400 | -1.96949800 |
| H  | 6.92079100  | -2.48506000 | -1.13732300 |
| H  | 6.59206800  | -1.87299300 | -2.78432900 |
| Pt | -0.63022900 | -0.95298700 | -1.29845900 |
| C  | -4.12152500 | 1.85016300  | -0.77809200 |
| C  | -4.21480300 | 1.30746300  | 0.66900300  |
| H  | -3.33049900 | 2.60034700  | -0.88694300 |
| H  | -5.06412100 | 2.28078200  | -1.13208000 |
| H  | -3.58204000 | 1.86383700  | 1.36773800  |
| H  | -5.24142800 | 1.30812600  | 1.05396000  |

|   |             |             |             |
|---|-------------|-------------|-------------|
| C | -2.44276900 | -4.08318100 | -1.34232700 |
| C | -2.08633100 | -3.45338900 | -2.69788900 |
| H | -1.54660100 | -4.29608400 | -0.74757400 |
| H | -3.03614300 | -4.99673100 | -1.44007100 |
| H | -1.07491100 | -3.67626000 | -3.04017800 |
| H | -2.80535400 | -3.71292300 | -3.48245000 |
| B | -3.50797500 | -0.34668700 | -0.74167500 |
| B | -2.94859100 | -1.85832300 | -1.25011600 |
| O | -3.79130700 | 0.70793600  | -1.58231100 |
| O | -3.75032600 | -0.04875900 | 0.58622100  |
| O | -2.20729800 | -2.02586300 | -2.46272600 |
| O | -3.21774400 | -3.07790300 | -0.67159200 |

65

### TSOC

imaginary frequencies -104.46

E(B3LYP/LanL2DZ(Pd),6-31G(d,p))=-2006.578869

H(B3LYP/LanL2DZ(Pd),6-31G(d,p))=-2006.541818

G(B3LYP/LanL2DZ(Pd),6-31G(d,p))=-2006.653788

|   |             |             |             |
|---|-------------|-------------|-------------|
| P | 0.72922100  | 0.03439000  | 0.06694500  |
| C | 0.72989600  | -0.20498300 | 1.89159100  |
| C | -0.47981500 | -0.09788800 | 2.59300700  |
| C | 1.90225700  | -0.48326400 | 2.61745800  |
| C | -0.52404100 | -0.25017900 | 3.97970300  |
| H | -1.40303100 | 0.09689800  | 2.05439000  |
| C | 1.86752000  | -0.63966500 | 3.99750100  |
| H | 2.85066600  | -0.58902000 | 2.10039100  |
| C | 0.65262700  | -0.52337500 | 4.68914700  |
| H | -1.47713100 | -0.16506900 | 4.48810300  |
| H | 2.76767000  | -0.85989200 | 4.56231800  |
| C | 2.30595400  | -0.73798200 | -0.49577700 |
| C | 3.52127800  | -0.03688800 | -0.59185000 |
| C | 2.29488600  | -2.09285500 | -0.85158900 |
| C | 4.68122200  | -0.67303800 | -1.01635800 |
| H | 3.56111500  | 1.01829300  | -0.34130600 |
| C | 3.45317400  | -2.74637900 | -1.27360000 |
| H | 1.35919500  | -2.64429600 | -0.80794600 |
| C | 4.65640900  | -2.03352200 | -1.35813500 |
| H | 5.62053900  | -0.13560500 | -1.09761500 |
| H | 3.40398000  | -3.79495100 | -1.54213600 |
| C | 0.99069200  | 1.84091700  | -0.16962300 |
| C | 1.62305400  | 2.65374000  | 0.78850000  |
| C | 0.54608100  | 2.43747800  | -1.35662400 |
| C | 1.81632400  | 4.00999900  | 0.55800600  |

|    |             |             |             |
|----|-------------|-------------|-------------|
| H  | 1.95845600  | 2.22521100  | 1.72786300  |
| C  | 0.73670400  | 3.79864800  | -1.60229500 |
| H  | 0.02815800  | 1.82789600  | -2.09222500 |
| C  | 1.37757600  | 4.59196900  | -0.64141300 |
| H  | 2.30043500  | 4.64331000  | 1.29442300  |
| H  | 0.37970100  | 4.22431700  | -2.53257900 |
| O  | 5.84402400  | -2.56290900 | -1.76490600 |
| O  | 1.61251900  | 5.92751600  | -0.77112300 |
| O  | 0.72160300  | -0.69756600 | 6.03909400  |
| C  | 1.19267100  | 6.57314000  | -1.96410000 |
| H  | 1.48086100  | 7.61989400  | -1.85689400 |
| H  | 1.68711100  | 6.15090500  | -2.84808000 |
| H  | 0.10521600  | 6.50986400  | -2.09724700 |
| C  | -0.47837000 | -0.60417700 | 6.79206900  |
| H  | -0.19531200 | -0.77677900 | 7.83158600  |
| H  | -0.93621000 | 0.38920000  | 6.70272800  |
| H  | -1.20867200 | -1.36356600 | 6.48536300  |
| C  | 5.87937000  | -3.93209000 | -2.13845500 |
| H  | 6.91088200  | -4.13832000 | -2.42785800 |
| H  | 5.60131000  | -4.58735800 | -1.30307500 |
| H  | 5.21785600  | -4.13630800 | -2.98990300 |
| Pt | -1.09527000 | -0.70847200 | -0.93703100 |
| C  | -3.48877700 | 2.50267600  | -0.86055200 |
| C  | -3.77813800 | 2.09960000  | 0.60068300  |
| H  | -2.56351200 | 3.08644200  | -0.94687700 |
| H  | -4.30436400 | 3.07230800  | -1.31810900 |
| H  | -3.23074600 | 2.71302900  | 1.32414100  |
| H  | -4.84825500 | 2.15417600  | 0.84129000  |
| C  | -4.30259400 | -3.51150100 | -0.80133900 |
| C  | -3.41741300 | -3.44498800 | -2.06405300 |
| H  | -4.03062300 | -4.33582000 | -0.13590900 |
| H  | -5.36861200 | -3.59527400 | -1.04335800 |
| H  | -2.50474100 | -4.04251400 | -1.97210300 |
| H  | -3.94188100 | -3.73716900 | -2.97765100 |
| B  | -3.08966100 | 0.26685000  | -0.59586700 |
| B  | -3.37132600 | -1.43565400 | -0.96347800 |
| O  | -3.32985200 | 1.25874600  | -1.55295800 |
| O  | -3.34781700 | 0.73795700  | 0.69725400  |
| O  | -3.04553900 | -2.05202900 | -2.16601700 |
| O  | -4.07664800 | -2.26335700 | -0.12286800 |

65

C

imaginary frequencies no

E(B3LYP/LanL2DZ(Pd),6-31G(d,p))=-2006.607528

H(B3LYP/LanL2DZ(Pd),6-31G(d,p))=-2006.569476

G(B3LYP/LanL2DZ(Pd),6-31G(d,p))=-2006.685562

|   |             |             |             |
|---|-------------|-------------|-------------|
| P | -0.85219900 | -0.03934000 | -0.03959800 |
| C | -1.52475500 | -0.69500500 | 1.53942100  |
| C | -0.64733200 | -1.33684000 | 2.42493200  |
| C | -2.87936800 | -0.58161800 | 1.90310000  |
| C | -1.10377500 | -1.87156500 | 3.63135900  |
| H | 0.40872800  | -1.41657200 | 2.18098500  |
| C | -3.34259300 | -1.10697600 | 3.10197800  |
| H | -3.57558600 | -0.06702700 | 1.24758400  |
| C | -2.45700900 | -1.75910300 | 3.97435000  |
| H | -0.39695900 | -2.35767300 | 4.29328100  |
| H | -4.38508400 | -1.02020100 | 3.39092600  |
| C | -2.02500000 | 1.29702400  | -0.51401300 |
| C | -3.04425900 | 1.14883100  | -1.47036700 |
| C | -1.86418000 | 2.55206800  | 0.09137900  |
| C | -3.87488100 | 2.21311300  | -1.79885200 |
| H | -3.18584900 | 0.19429700  | -1.96677000 |
| C | -2.69378800 | 3.62809800  | -0.22524200 |
| H | -1.07921700 | 2.69923200  | 0.83040000  |
| C | -3.70701500 | 3.46033700  | -1.17859700 |
| H | -4.66182600 | 2.10498800  | -2.53829300 |
| H | -2.53692900 | 4.58155100  | 0.26475600  |
| C | -1.11416500 | -1.38016700 | -1.26656800 |
| C | -2.17252500 | -2.30486100 | -1.18772900 |
| C | -0.20618900 | -1.49721900 | -2.32738000 |
| C | -2.32600000 | -3.29597500 | -2.14716000 |
| H | -2.87527400 | -2.25607100 | -0.36152400 |
| C | -0.35136900 | -2.48835000 | -3.30029900 |
| H | 0.63847400  | -0.81670000 | -2.38545600 |
| C | -1.41682600 | -3.39257400 | -3.21370500 |
| H | -3.13748100 | -4.01441800 | -2.09160800 |
| H | 0.37288500  | -2.54934900 | -4.10373200 |
| O | -4.56974500 | 4.43787200  | -1.57170800 |
| O | -1.65194900 | -4.40008900 | -4.09918700 |
| O | -3.00759600 | -2.23735900 | 5.12517100  |
| C | -0.76211800 | -4.55553800 | -5.19512000 |
| H | -1.13489500 | -5.40706600 | -5.76622100 |
| H | -0.75211200 | -3.66606000 | -5.83758900 |
| H | 0.26084300  | -4.76602200 | -4.85850000 |
| C | -2.15982000 | -2.89487600 | 6.05508200  |
| H | -2.79935000 | -3.19051800 | 6.88812200  |
| H | -1.69800900 | -3.78984800 | 5.61908100  |



|    |             |             |             |
|----|-------------|-------------|-------------|
| H  | -1.37045200 | -2.22811700 | 6.42448300  |
| C  | -4.43774000 | 5.72774300  | -0.99247500 |
| H  | -5.21317600 | 6.34340900  | -1.45052400 |
| H  | -4.59281600 | 5.70154900  | 0.09364800  |
| H  | -3.45509400 | 6.16753800  | -1.20464000 |
| Pt | 1.46512300  | 0.80866000  | 0.05111800  |
| C  | 3.67213600  | -2.71140200 | -0.46635000 |
| C  | 3.65172400  | -2.61760400 | 1.07477200  |
| H  | 3.03794200  | -3.52533800 | -0.84021200 |
| H  | 4.68054300  | -2.84296800 | -0.87091600 |
| H  | 3.27589900  | -3.52725900 | 1.55395500  |
| H  | 4.64162200  | -2.38836200 | 1.48691000  |
| C  | 5.51083900  | 2.30671300  | 0.24804900  |
| C  | 4.66379500  | 3.58702200  | 0.08882300  |
| H  | 6.17843200  | 2.34184900  | 1.11521700  |
| H  | 6.11491600  | 2.09578000  | -0.64361800 |
| H  | 4.66504900  | 4.20127800  | 0.99838200  |
| H  | 4.98878500  | 4.21279400  | -0.74878100 |
| B  | 2.57503900  | -0.82120400 | 0.17830900  |
| B  | 3.28835200  | 1.74594600  | 0.11321800  |
| O  | 3.13634600  | -1.45791600 | -0.91315000 |
| O  | 2.76615800  | -1.52364400 | 1.35815100  |
| O  | 3.33228100  | 3.11062800  | -0.15588900 |
| O  | 4.55021800  | 1.25658200  | 0.42329700  |

93

**(S)-Cplx2**

imaginary frequencies no

E(B3LYP/LanL2DZ(Pd),6-31G(d,p))=-2799.637863

H(B3LYP/LanL2DZ(Pd),6-31G(d,p))=-2799.581996

G(B3LYP/LanL2DZ(Pd),6-31G(d,p))=-2799.737739

|    |             |             |             |
|----|-------------|-------------|-------------|
| P  | 1.61960000  | 0.44244800  | 0.13955200  |
| Pt | -0.53571200 | -0.52651200 | -0.43520200 |
| C  | 3.02105700  | -0.70966800 | 0.49075300  |
| C  | 3.76457700  | -0.68336900 | 1.68236300  |
| C  | 3.37485800  | -1.64769600 | -0.48920400 |
| C  | 4.82556900  | -1.56013600 | 1.88380300  |
| C  | 4.44290600  | -2.52622400 | -0.30389000 |
| C  | 5.17568400  | -2.48523600 | 0.89037500  |
| C  | 2.34590600  | 1.48938300  | -1.18918000 |
| C  | 1.61028000  | 1.74450200  | -2.36056000 |
| C  | 3.65128000  | 1.99518400  | -1.10627800 |
| C  | 2.14765400  | 2.50364200  | -3.39247700 |
| C  | 4.20149800  | 2.76518700  | -2.13183800 |

|   |             |             |             |
|---|-------------|-------------|-------------|
| C | 3.44456500  | 3.02655800  | -3.28267200 |
| O | 6.23341100  | -3.29599100 | 1.17958400  |
| C | 1.52319600  | 1.47173000  | 1.66173300  |
| C | 0.83707100  | 0.91894400  | 2.76464400  |
| C | 2.03367600  | 2.76782500  | 1.77931600  |
| C | 0.69170800  | 1.63676500  | 3.94214400  |
| C | 1.88042900  | 3.50549000  | 2.95850700  |
| C | 1.21066500  | 2.93819900  | 4.04789700  |
| O | 3.88038200  | 3.75991800  | -4.34362300 |
| O | 1.00580500  | 3.56047700  | 5.24251400  |
| C | 5.19110300  | 4.30352300  | -4.29751600 |
| C | 6.63717900  | -4.24901600 | 0.20853500  |
| C | 1.48890700  | 4.88483200  | 5.40418700  |
| B | 0.19037800  | -2.30861900 | 0.32723600  |
| O | 0.74581200  | -3.42356900 | -0.28650200 |
| C | 1.09903500  | -4.38448500 | 0.71662000  |
| C | 0.91976400  | -3.64016800 | 2.05815100  |
| B | -1.46618000 | -2.14366700 | -1.34066600 |
| O | -2.36485700 | -3.06156300 | -0.79707300 |
| C | -2.61851300 | -4.08266200 | -1.77399000 |
| O | 0.22785300  | -2.43218200 | 1.71314300  |
| O | -1.25054900 | -2.39076700 | -2.68576300 |
| C | -2.04372600 | -3.51398800 | -3.08930300 |
| H | 3.51385900  | 0.02685400  | 2.46296400  |
| H | 2.80546300  | -1.70750200 | -1.41140000 |
| H | 5.40165500  | -1.54278500 | 2.80344000  |
| H | 4.68734700  | -3.23329100 | -1.08767600 |
| H | 0.61307800  | 1.32651700  | -2.46265700 |
| H | 4.26254800  | 1.77713700  | -0.23532300 |
| H | 1.58442500  | 2.69774300  | -4.29938600 |
| H | 5.21306000  | 3.14023100  | -2.03028600 |
| H | 0.41666300  | -0.08077200 | 2.69033600  |
| H | 2.55038800  | 3.22810600  | 0.94378600  |
| H | 0.16631500  | 1.21731400  | 4.79390600  |
| H | 2.28266900  | 4.51044300  | 3.00988700  |
| H | 5.95306000  | 3.51711100  | -4.22467700 |
| H | 5.31148400  | 4.99887400  | -3.45701700 |
| H | 5.32441500  | 4.84649100  | -5.23428100 |
| H | 6.94669700  | -3.76763100 | -0.72792000 |
| H | 5.83924800  | -4.97106000 | -0.00786100 |
| H | 7.48966400  | -4.77589000 | 0.63997100  |
| H | 1.02758300  | 5.57451100  | 4.68574100  |
| H | 2.58033900  | 4.93421300  | 5.29787000  |
| H | 1.21364700  | 5.18444200  | 6.41649300  |

|    |             |             |             |
|----|-------------|-------------|-------------|
| Si | -4.21266900 | 0.38789900  | -1.01243400 |
| C  | -4.58939200 | -0.81215100 | -2.41231600 |
| H  | -4.34375600 | -1.83196800 | -2.10747600 |
| H  | -5.65456900 | -0.77446300 | -2.66184200 |
| H  | -4.01160500 | -0.56653500 | -3.30848000 |
| C  | -2.39418000 | 0.64224900  | -0.77804100 |
| C  | -1.47622200 | 1.48627300  | -0.54867600 |
| C  | -4.89618900 | 2.03867700  | -1.45169700 |
| C  | -5.34099100 | 3.13137400  | -1.75611200 |
| C  | -5.00661600 | -0.17689300 | 0.60171900  |
| C  | -5.99710400 | 0.59254800  | 1.23709800  |
| C  | -4.62644200 | -1.39471300 | 1.20042800  |
| C  | -6.59141800 | 0.16510800  | 2.42646200  |
| H  | -6.30477600 | 1.53718200  | 0.79653400  |
| C  | -5.21899400 | -1.82117500 | 2.39013900  |
| H  | -3.86165100 | -2.01388100 | 0.73853600  |
| C  | -6.20240800 | -1.04331700 | 3.00569200  |
| H  | -7.35549200 | 0.77600700  | 2.90049900  |
| H  | -4.91019500 | -2.76207600 | 2.83821700  |
| H  | -6.66205300 | -1.37721200 | 3.93242900  |
| H  | 2.12923200  | -4.71658500 | 0.55237400  |
| H  | 0.43494500  | -5.25332200 | 0.63012100  |
| H  | 0.32610200  | -4.20648500 | 2.78300100  |
| H  | 1.88063100  | -3.38188400 | 2.51866900  |
| H  | -1.41233200 | -4.23349700 | -3.62052900 |
| H  | -2.11043900 | -5.00395000 | -1.46434800 |
| H  | -2.83074300 | -3.17313700 | -3.77290000 |
| C  | -5.87723600 | 4.43682300  | -2.12583800 |
| H  | -5.87597800 | 5.12300600  | -1.27127200 |
| H  | -5.28324400 | 4.89650400  | -2.92397100 |
| H  | -6.90934500 | 4.35348000  | -2.48493400 |
| C  | -1.09349000 | 2.90267400  | -0.35820300 |
| H  | -0.72390600 | 3.07155800  | 0.65788400  |
| H  | -0.29629600 | 3.20202400  | -1.04509500 |
| H  | -1.96295200 | 3.54758300  | -0.52860500 |
| H  | -3.69404300 | -4.28149200 | -1.82587800 |

93

**(S)-TSCD**

imaginary frequencies -207.89

E(B3LYP/LanL2DZ(Pd),6-31G(d,p))=-2799.620377

H(B3LYP/LanL2DZ(Pd),6-31G(d,p))=-2799.565745

G(B3LYP/LanL2DZ(Pd),6-31G(d,p))=-2799.718876

|   |            |            |            |
|---|------------|------------|------------|
| P | 1.67133700 | 0.40400200 | 0.14156500 |
|---|------------|------------|------------|

|    |             |             |             |
|----|-------------|-------------|-------------|
| Pt | -0.41774000 | -0.44561400 | -0.46583100 |
| C  | 3.03034800  | -0.79992600 | 0.45589400  |
| C  | 3.93019500  | -0.68063500 | 1.52813700  |
| C  | 3.21343300  | -1.85069500 | -0.45202400 |
| C  | 4.97919300  | -1.57965400 | 1.68324200  |
| C  | 4.26640900  | -2.75595100 | -0.31145900 |
| C  | 5.15789400  | -2.62129500 | 0.76116500  |
| C  | 2.44948100  | 1.53359200  | -1.08631900 |
| C  | 1.80099900  | 1.80401700  | -2.30347400 |
| C  | 3.71732700  | 2.09371400  | -0.87456500 |
| C  | 2.38517700  | 2.62577900  | -3.25932000 |
| C  | 4.31235800  | 2.92861800  | -1.82096200 |
| C  | 3.64197100  | 3.20107800  | -3.02187500 |
| O  | 6.21657600  | -3.44770400 | 0.99692100  |
| C  | 1.51403000  | 1.34373400  | 1.71170200  |
| C  | 0.96921700  | 0.66497800  | 2.82382200  |
| C  | 1.81711300  | 2.70194400  | 1.84208400  |
| C  | 0.76664200  | 1.32709000  | 4.02464000  |
| C  | 1.60648200  | 3.37988200  | 3.04795000  |
| C  | 1.08393100  | 2.69046500  | 4.14683500  |
| O  | 4.12835600  | 3.99632400  | -4.01451400 |
| O  | 0.84363800  | 3.24534800  | 5.36848900  |
| C  | 5.40350100  | 4.59474600  | -3.83795400 |
| C  | 6.44940800  | -4.51723300 | 0.09334400  |
| C  | 1.12207300  | 4.62459700  | 5.54793800  |
| B  | 0.07562700  | -2.32142500 | 0.29683400  |
| O  | 0.30109900  | -3.51798400 | -0.38537300 |
| C  | 0.52424300  | -4.56983100 | 0.56256600  |
| C  | 0.69782600  | -3.84929400 | 1.91469900  |
| B  | -1.81381700 | -1.59453300 | -1.60404900 |
| O  | -2.66881300 | -2.59666000 | -1.14249600 |
| C  | -2.68896200 | -3.63408400 | -2.13158200 |
| O  | 0.23443400  | -2.51513100 | 1.67147800  |
| O  | -1.49686200 | -1.77306500 | -2.94288700 |
| C  | -2.15031700 | -2.95914700 | -3.40948600 |
| H  | 3.80554600  | 0.11590500  | 2.25484900  |
| H  | 2.51358600  | -1.98120900 | -1.27167500 |
| H  | 5.67355700  | -1.49660600 | 2.51319900  |
| H  | 4.37552800  | -3.55572400 | -1.03422000 |
| H  | 0.83461800  | 1.34905500  | -2.49843500 |
| H  | 4.26231800  | 1.87409900  | 0.03884000  |
| H  | 1.88968800  | 2.83176800  | -4.20250000 |
| H  | 5.29155600  | 3.34671600  | -1.61914300 |
| H  | 0.69422900  | -0.38304800 | 2.73467000  |

|    |             |             |             |
|----|-------------|-------------|-------------|
| H  | 2.22049900  | 3.25365500  | 0.99961400  |
| H  | 0.34891200  | 0.81353900  | 4.88448000  |
| H  | 1.85185800  | 4.43343800  | 3.11226800  |
| H  | 6.19290400  | 3.84040100  | -3.72785600 |
| H  | 5.42068500  | 5.26202000  | -2.96672900 |
| H  | 5.58899900  | 5.17891300  | -4.74047500 |
| H  | 6.64260400  | -4.15361300 | -0.92397100 |
| H  | 5.60494800  | -5.21789300 | 0.06796100  |
| H  | 7.33485300  | -5.03649500 | 0.46323700  |
| H  | 0.52404000  | 5.24985700  | 4.87257600  |
| H  | 2.18593900  | 4.84712100  | 5.39347400  |
| H  | 0.85442800  | 4.85444400  | 6.58041700  |
| C  | -5.16116100 | -1.00338200 | -2.19895500 |
| H  | -5.05430100 | -2.04500400 | -1.89158400 |
| H  | -6.22765400 | -0.75632800 | -2.22144400 |
| H  | -4.76678000 | -0.88965300 | -3.21394100 |
| C  | -2.41107300 | 0.22897100  | -1.19716900 |
| C  | -1.58861500 | 1.23818500  | -1.07426300 |
| C  | -4.76014100 | -0.20450200 | 0.79129100  |
| C  | -5.52061200 | 0.71404700  | 1.53732900  |
| C  | -4.37397300 | -1.40605100 | 1.41814600  |
| C  | -5.88773300 | 0.44493400  | 2.85755100  |
| H  | -5.82746400 | 1.65095200  | 1.08059800  |
| C  | -4.73864300 | -1.67431700 | 2.73815400  |
| H  | -3.77821200 | -2.13094200 | 0.87175600  |
| C  | -5.49664000 | -0.75063100 | 3.46116200  |
| H  | -6.47605100 | 1.16998000  | 3.41415700  |
| H  | -4.42707100 | -2.60553800 | 3.20405100  |
| H  | -5.77871200 | -0.96105600 | 4.48954600  |
| H  | 1.41021500  | -5.14465000 | 0.27153900  |
| H  | -0.33996100 | -5.24682000 | 0.56243100  |
| H  | 0.10933100  | -4.30348300 | 2.71874700  |
| H  | 1.74759100  | -3.81258100 | 2.23182100  |
| H  | -1.43164200 | -3.58567100 | -3.94663100 |
| H  | -2.03442300 | -4.44647400 | -1.79660600 |
| H  | -2.95379000 | -2.67867700 | -4.10268000 |
| C  | -1.56303200 | 2.71910700  | -1.11978300 |
| H  | -1.23262300 | 3.11106200  | -0.15108800 |
| H  | -0.82886700 | 3.06314700  | -1.85710900 |
| H  | -2.54024500 | 3.14555800  | -1.36832400 |
| H  | -3.70822300 | -4.01785000 | -2.24470300 |
| Si | -4.28895300 | 0.16216900  | -0.99925900 |
| C  | -4.89108000 | 1.85257000  | -1.41294800 |
| C  | -5.35897100 | 2.93659200  | -1.71416600 |

|   |             |            |             |
|---|-------------|------------|-------------|
| C | -5.91402500 | 4.23643700 | -2.07644300 |
| H | -5.52850000 | 5.02901100 | -1.42516800 |
| H | -5.66037400 | 4.49953500 | -3.10961200 |
| H | -7.00661500 | 4.23668600 | -1.99162600 |

93

**(S)-D**

imaginary frequencies no

E(B3LYP/LanL2DZ(Pd),6-31G(d,p))=-2799.634825

H(B3LYP/LanL2DZ(Pd),6-31G(d,p))=-2799.579602

G(B3LYP/LanL2DZ(Pd),6-31G(d,p))=-2799.734971

|    |             |             |             |
|----|-------------|-------------|-------------|
| P  | -1.70468800 | -0.15824700 | 0.12128300  |
| Pt | 0.47818800  | -0.08776000 | -0.49349900 |
| C  | -2.49635200 | 1.37855600  | 0.75634900  |
| C  | -3.39736300 | 1.37875600  | 1.83487100  |
| C  | -2.22080000 | 2.59548300  | 0.12056600  |
| C  | -4.00822300 | 2.55458100  | 2.25481000  |
| C  | -2.83130000 | 3.78212700  | 0.52830900  |
| C  | -3.73263800 | 3.76442700  | 1.60112100  |
| C  | -2.85220500 | -0.67249900 | -1.22995600 |
| C  | -2.35139000 | -1.32988100 | -2.36736500 |
| C  | -4.23046200 | -0.42598700 | -1.16048400 |
| C  | -3.19996600 | -1.73885700 | -3.38716200 |
| C  | -5.09493900 | -0.83357900 | -2.17827500 |
| C  | -4.57885100 | -1.49574500 | -3.30010400 |
| O  | -4.38134000 | 4.86063200  | 2.08701000  |
| C  | -1.94328400 | -1.38679600 | 1.46822800  |
| C  | -1.11919100 | -1.30928100 | 2.61132900  |
| C  | -2.88373200 | -2.41869500 | 1.39119700  |
| C  | -1.25288900 | -2.23033300 | 3.63919000  |
| C  | -3.01919600 | -3.35601700 | 2.42063100  |
| C  | -2.20237900 | -3.26219700 | 3.55201800  |
| O  | -5.32623200 | -1.93097000 | -4.35278400 |
| O  | -2.24672600 | -4.11546900 | 4.61416500  |
| C  | -6.72621400 | -1.69974200 | -4.32829500 |
| C  | -4.13808700 | 6.11623300  | 1.47161100  |
| C  | -3.17747100 | -5.18578200 | 4.57981200  |
| B  | 0.82987100  | 1.47578100  | 0.83564400  |
| O  | 1.12381000  | 2.77697800  | 0.43779200  |
| C  | 1.55775200  | 3.52899200  | 1.58258100  |
| C  | 1.24781300  | 2.62169100  | 2.79251700  |
| B  | 2.18934600  | 0.75048500  | -2.33729200 |
| O  | 3.09492200  | 1.79008800  | -2.18094800 |
| C  | 2.56240800  | 2.92776500  | -2.86996100 |

|    |             |             |             |
|----|-------------|-------------|-------------|
| O  | 0.91836800  | 1.34818600  | 2.21766300  |
| O  | 1.24662200  | 1.02806300  | -3.31680200 |
| C  | 1.53838500  | 2.32406000  | -3.85282400 |
| H  | -3.61698400 | 0.45275700  | 2.35661700  |
| H  | -1.50034800 | 2.62385800  | -0.69071500 |
| H  | -4.69951800 | 2.56270000  | 3.09135200  |
| H  | -2.59038800 | 4.70521000  | 0.01459700  |
| H  | -1.28140700 | -1.49888800 | -2.44665000 |
| H  | -4.64719600 | 0.09838900  | -0.30635900 |
| H  | -2.81671600 | -2.23965600 | -4.27039400 |
| H  | -6.15427700 | -0.62316400 | -2.08995100 |
| H  | -0.37148300 | -0.52484000 | 2.68739600  |
| H  | -3.52440500 | -2.50653900 | 0.52015000  |
| H  | -0.62482700 | -2.17855000 | 4.52275900  |
| H  | -3.75560400 | -4.14509400 | 2.32455000  |
| H  | -6.95912600 | -0.62789500 | -4.29093600 |
| H  | -7.20478200 | -2.20016800 | -3.47666300 |
| H  | -7.11704000 | -2.11959400 | -5.25638100 |
| H  | -4.43106800 | 6.11323100  | 0.41392700  |
| H  | -3.08310000 | 6.40843500  | 1.54983500  |
| H  | -4.75121900 | 6.83961800  | 2.01130000  |
| H  | -2.98845300 | -5.86017800 | 3.73472000  |
| H  | -4.21166800 | -4.82218400 | 4.52285500  |
| H  | -3.04137700 | -5.73384300 | 5.51341100  |
| Si | 4.20005100  | -0.91973600 | -1.04503500 |
| C  | 5.41356700  | -0.62182900 | -2.46306200 |
| H  | 5.30483500  | 0.39220600  | -2.85791800 |
| H  | 6.44746100  | -0.75909700 | -2.13047400 |
| H  | 5.22478100  | -1.32591900 | -3.28032100 |
| C  | 2.40434900  | -0.64210900 | -1.64784300 |
| C  | 1.36022700  | -1.56137700 | -1.58991000 |
| C  | 4.45140800  | -2.64287800 | -0.44832900 |
| C  | 4.69990100  | -3.75978000 | -0.02949400 |
| C  | 4.60771700  | 0.19966600  | 0.42677300  |
| C  | 5.15295300  | 1.48499500  | 0.25208400  |
| C  | 4.39580800  | -0.24623100 | 1.74390100  |
| C  | 5.47853700  | 2.28841300  | 1.34661400  |
| H  | 5.31091900  | 1.87044400  | -0.74981000 |
| C  | 4.71396500  | 0.55460600  | 2.84243300  |
| H  | 3.98661900  | -1.23821700 | 1.91393400  |
| C  | 5.26010700  | 1.82459800  | 2.64626800  |
| H  | 5.90785500  | 3.27414900  | 1.18531300  |
| H  | 4.54161100  | 0.18437800  | 3.84963000  |
| H  | 5.51998600  | 2.44607800  | 3.49955300  |

|   |            |             |             |
|---|------------|-------------|-------------|
| H | 1.01884500 | 4.48231400  | 1.61801300  |
| H | 2.63008100 | 3.73476900  | 1.48776500  |
| H | 2.10648500 | 2.50577300  | 3.46095800  |
| H | 0.39298200 | 2.98236000  | 3.37810100  |
| H | 0.61716300 | 2.91081300  | -3.92088300 |
| H | 2.08539800 | 3.58470400  | -2.13405800 |
| H | 1.95172000 | 2.20755000  | -4.86336900 |
| C | 4.98154300 | -5.10238700 | 0.46622200  |
| H | 5.27343400 | -5.08100100 | 1.52229800  |
| H | 4.10177000 | -5.75006300 | 0.37644800  |
| H | 5.79856900 | -5.56881400 | -0.09597300 |
| C | 1.39957900 | -3.04448300 | -1.69439800 |
| H | 0.79402300 | -3.50652700 | -0.90742900 |
| H | 0.90750000 | -3.30342400 | -2.64396400 |
| H | 2.40245000 | -3.48307600 | -1.70209000 |
| H | 3.37147100 | 3.47003200  | -3.36935300 |

93

**(S)-E**

imaginary frequencies no

E(B3LYP/LanL2DZ(Pd),6-31G(d,p))=-2799.640561

H(B3LYP/LanL2DZ(Pd),6-31G(d,p))=-2799.586044

G(B3LYP/LanL2DZ(Pd),6-31G(d,p))=-2799.738962

|    |             |             |             |
|----|-------------|-------------|-------------|
| P  | 1.58682000  | 0.38203100  | 0.18728800  |
| Pt | 0.06893300  | -1.12000300 | -0.45824300 |
| C  | 1.04005000  | 2.14229900  | 0.29588100  |
| C  | 1.03213400  | 2.87387000  | 1.49389600  |
| C  | 0.63007400  | 2.78800400  | -0.87821800 |
| C  | 0.62701700  | 4.20397100  | 1.51583300  |
| C  | 0.22599200  | 4.12200800  | -0.87219800 |
| C  | 0.22071600  | 4.83798400  | 0.33391900  |
| C  | 2.22696900  | 0.01228300  | 1.86892600  |
| C  | 1.30031700  | -0.39745100 | 2.84738200  |
| C  | 3.57196900  | 0.11201500  | 2.23264800  |
| C  | 1.70538300  | -0.67092000 | 4.14502500  |
| C  | 3.99532900  | -0.17085900 | 3.53434500  |
| C  | 3.05945700  | -0.55971300 | 4.49901300  |
| O  | -0.15435900 | 6.14148700  | 0.45799000  |
| C  | 3.03933100  | 0.59031100  | -0.93497700 |
| C  | 3.25336900  | -0.24734500 | -2.04267300 |
| C  | 3.93818900  | 1.64911000  | -0.73042900 |
| C  | 4.33759500  | -0.05360900 | -2.88935000 |
| C  | 5.03846900  | 1.84788000  | -1.56511200 |
| C  | 5.24476600  | 0.98868300  | -2.65304100 |



|    |             |             |             |
|----|-------------|-------------|-------------|
| O  | 3.35797600  | -0.85552800 | 5.79493600  |
| O  | 6.27638900  | 1.09000300  | -3.53543600 |
| C  | 4.71328100  | -0.78063900 | 6.20851500  |
| C  | -0.60232200 | 6.82843000  | -0.70075900 |
| C  | 7.21864600  | 2.13717600  | -3.35796500 |
| B  | 1.65285600  | -2.50654300 | -0.52768900 |
| B  | -2.58716400 | -2.09011300 | -1.54186800 |
| H  | 1.34320700  | 2.40348500  | 2.42043400  |
| H  | 0.61541400  | 2.24224700  | -1.81766500 |
| H  | 0.61525800  | 4.77241100  | 2.44007200  |
| H  | -0.08543500 | 4.58666800  | -1.80013800 |
| H  | 0.25475800  | -0.51718100 | 2.57883700  |
| H  | 4.31700200  | 0.39715300  | 1.49840200  |
| H  | 0.99465700  | -0.98665800 | 4.90163000  |
| H  | 5.04852400  | -0.09149800 | 3.77661600  |
| H  | 2.55596900  | -1.05130600 | -2.24872500 |
| H  | 3.77685300  | 2.34706300  | 0.08526100  |
| H  | 4.49811600  | -0.69610000 | -3.74901600 |
| H  | 5.71089900  | 2.67450100  | -1.36826500 |
| H  | 5.11552100  | 0.23457300  | 6.09731200  |
| H  | 5.34659500  | -1.48044500 | 5.64838200  |
| H  | 4.72159900  | -1.05554700 | 7.26430500  |
| H  | -1.49027500 | 6.35205000  | -1.13509700 |
| H  | 0.18289300  | 6.88833700  | -1.46530100 |
| H  | -0.85983400 | 7.83631600  | -0.37193200 |
| H  | 7.73689500  | 2.05639300  | -2.39397100 |
| H  | 6.74458500  | 3.12427100  | -3.42934100 |
| H  | 7.94431100  | 2.02866900  | -4.16528000 |
| O  | -1.31557500 | -2.66037500 | -1.26190300 |
| O  | -3.27549800 | -2.89607100 | -2.41680600 |
| O  | 2.54497500  | -2.81035700 | 0.49130300  |
| O  | 1.84851800  | -3.37010300 | -1.61225200 |
| Si | -4.74690500 | -0.18963400 | -0.80233600 |
| C  | -5.87382000 | -1.28906800 | -1.85356100 |
| H  | -5.86922800 | -2.32099200 | -1.48977000 |
| H  | -6.90242400 | -0.91552400 | -1.81429300 |
| H  | -5.55024600 | -1.30682900 | -2.89820800 |
| C  | -2.95907700 | -0.78319500 | -0.85507100 |
| C  | -1.88068100 | -0.13630000 | -0.27952800 |
| C  | -4.93370900 | 1.52219000  | -1.46670900 |
| C  | -5.07893200 | 2.64108900  | -1.92638400 |
| C  | -5.43466500 | -0.18276800 | 0.96961000  |
| C  | -6.47074800 | 0.68730400  | 1.35484100  |
| C  | -4.96687100 | -1.10130500 | 1.92692600  |

|   |             |             |             |
|---|-------------|-------------|-------------|
| C | -7.02200300 | 0.63863400  | 2.63669300  |
| H | -6.84290000 | 1.42183200  | 0.64444600  |
| C | -5.51465900 | -1.15701100 | 3.21022100  |
| H | -4.15229200 | -1.77411900 | 1.66845700  |
| C | -6.54597400 | -0.28658200 | 3.56797600  |
| H | -7.81987100 | 1.32456100  | 2.91049500  |
| H | -5.13380000 | -1.87542200 | 3.93191000  |
| H | -6.97249700 | -0.32556300 | 4.56698400  |
| C | -5.24704500 | 3.98208100  | -2.47640600 |
| H | -5.04087400 | 4.75029700  | -1.72176400 |
| H | -4.56769600 | 4.15254200  | -3.31992000 |
| H | -6.26959300 | 4.13961100  | -2.83884300 |
| C | -2.10352100 | 1.13909200  | 0.49214500  |
| H | -1.83555000 | 2.00156000  | -0.12920000 |
| H | -3.13887700 | 1.28365200  | 0.82143000  |
| H | -1.45746800 | 1.19094400  | 1.37436900  |
| C | -1.08777300 | -3.75486600 | -2.17807500 |
| C | -2.51088000 | -4.08391300 | -2.66199800 |
| C | 2.84195800  | -4.34933000 | -1.26834200 |
| C | 3.43890700  | -3.84495200 | 0.06160300  |
| H | -0.60123900 | -4.57322100 | -1.64660200 |
| H | -0.42674100 | -3.41592400 | -2.97866400 |
| H | -2.95392000 | -4.91596800 | -2.10060400 |
| H | -2.54478100 | -4.32679900 | -3.72804200 |
| H | 2.36087900  | -5.33028500 | -1.16281200 |
| H | 3.58270400  | -4.41694700 | -2.07186300 |
| H | 3.49304100  | -4.62467300 | 0.82815900  |
| H | 4.44214600  | -3.42022100 | -0.06829700 |

93

**(S)-TSEF**

imaginary frequencies -90.11

E(B3LYP/LanL2DZ(Pd),6-31G(d,p))=-2799.632624

H(B3LYP/LanL2DZ(Pd),6-31G(d,p))=-2799.579433

G(B3LYP/LanL2DZ(Pd),6-31G(d,p))=-2799.730773

|    |             |             |             |
|----|-------------|-------------|-------------|
| P  | 1.81868600  | 0.33697900  | 0.16485900  |
| Pt | -0.06767000 | -0.78138300 | -0.20564400 |
| C  | 1.38653300  | 2.06170200  | 0.65570600  |
| C  | 1.80140000  | 2.64572900  | 1.86403700  |
| C  | 0.60896400  | 2.83091100  | -0.22153400 |
| C  | 1.45365700  | 3.95415200  | 2.17938800  |
| C  | 0.25895800  | 4.14632800  | 0.07974400  |
| C  | 0.68093500  | 4.71481400  | 1.29033700  |
| C  | 2.91703800  | -0.24477300 | 1.51578900  |

|   |             |             |             |
|---|-------------|-------------|-------------|
| C | 2.33409200  | -0.75023900 | 2.69508600  |
| C | 4.31233800  | -0.19744000 | 1.43092300  |
| C | 3.12317800  | -1.16956600 | 3.75469000  |
| C | 5.11858300  | -0.62933100 | 2.48809400  |
| C | 4.52384700  | -1.11287900 | 3.65912100  |
| O | 0.39561600  | 5.98435500  | 1.68961200  |
| C | 2.89801700  | 0.62387700  | -1.30012400 |
| C | 2.93454500  | -0.28929400 | -2.36985500 |
| C | 3.70392900  | 1.76958600  | -1.37860700 |
| C | 3.75482600  | -0.06500800 | -3.46734600 |
| C | 4.53659000  | 2.00166800  | -2.47445600 |
| C | 4.56327000  | 1.07989500  | -3.52935000 |
| O | 5.20823400  | -1.55456300 | 4.75009000  |
| O | 5.32710600  | 1.20708400  | -4.64833900 |
| C | 6.62715900  | -1.52339600 | 4.71502000  |
| C | -0.42403000 | 6.78805600  | 0.85298700  |
| C | 6.15400100  | 2.35447600  | -4.77706400 |
| B | 1.17036800  | -2.40117400 | -0.16946600 |
| B | -2.68371500 | -1.82472700 | -1.71708900 |
| H | 2.40189900  | 2.07739200  | 2.56598200  |
| H | 0.25944100  | 2.39510200  | -1.15357300 |
| H | 1.76829500  | 4.40938100  | 3.11281500  |
| H | -0.34521800 | 4.70797800  | -0.62254800 |
| H | 1.25377500  | -0.82599800 | 2.76939000  |
| H | 4.79009700  | 0.17563400  | 0.53128400  |
| H | 2.68059400  | -1.55955900 | 4.66528800  |
| H | 6.19618900  | -0.58309000 | 2.38484500  |
| H | 2.32002600  | -1.18102600 | -2.33798100 |
| H | 3.68284700  | 2.50420200  | -0.57996400 |
| H | 3.78221800  | -0.76328400 | -4.29759900 |
| H | 5.14331100  | 2.89902400  | -2.49828800 |
| H | 7.00603000  | -0.50153400 | 4.58609300  |
| H | 7.02602600  | -2.15753900 | 3.91298300  |
| H | 6.96053900  | -1.91117500 | 5.67862200  |
| H | -1.41334000 | 6.33764400  | 0.70519800  |
| H | 0.04251100  | 6.96143600  | -0.12514100 |
| H | -0.53645000 | 7.74194300  | 1.37026500  |
| H | 6.90157700  | 2.40661200  | -3.97532400 |
| H | 5.56415500  | 3.27975600  | -4.77886400 |
| H | 6.66335700  | 2.25158800  | -5.73623500 |
| O | -1.51398100 | -2.55940200 | -1.47713400 |
| O | -3.29288900 | -2.23996500 | -2.88564800 |
| O | 1.31116300  | -3.16145800 | 0.97607600  |
| O | 1.70815000  | -3.04520600 | -1.27920400 |

|    |             |             |             |
|----|-------------|-------------|-------------|
| Si | -4.95553400 | -0.24094500 | -0.63376700 |
| C  | -6.04337500 | -1.43647500 | -1.61973800 |
| H  | -5.93955500 | -2.45891600 | -1.23981700 |
| H  | -7.09598100 | -1.14930700 | -1.52735400 |
| H  | -5.76904000 | -1.44488700 | -2.67733100 |
| C  | -3.12733600 | -0.69796000 | -0.77172900 |
| C  | -2.10849100 | -0.07539700 | -0.08675600 |
| C  | -5.30260500 | 1.45167000  | -1.28249800 |
| C  | -5.54171500 | 2.55949800  | -1.73000500 |
| C  | -5.56049500 | -0.28589800 | 1.16690600  |
| C  | -6.59228900 | 0.55594200  | 1.61931200  |
| C  | -5.03247100 | -1.21678900 | 2.08008200  |
| C  | -7.08114700 | 0.46989700  | 2.92453800  |
| H  | -7.01036300 | 1.29807300  | 0.94324600  |
| C  | -5.51760300 | -1.30949300 | 3.38617400  |
| H  | -4.21876200 | -1.86880300 | 1.77018000  |
| C  | -6.54549200 | -0.46562100 | 3.81177600  |
| H  | -7.87722000 | 1.13491200  | 3.25049900  |
| H  | -5.08998400 | -2.03572300 | 4.07301700  |
| H  | -6.92285500 | -0.53338700 | 4.82890200  |
| C  | -5.82224300 | 3.88623900  | -2.26862600 |
| H  | -5.78058900 | 4.65121400  | -1.48433400 |
| H  | -5.09492400 | 4.16221000  | -3.04117500 |
| H  | -6.81941600 | 3.93026600  | -2.72196800 |
| C  | -2.38399800 | 1.06755600  | 0.86307700  |
| H  | -1.74316400 | 1.92484200  | 0.63322100  |
| H  | -3.42403600 | 1.41419800  | 0.87665500  |
| H  | -2.11824400 | 0.76195400  | 1.88394400  |
| C  | -1.22278700 | -3.33540000 | -2.65108400 |
| C  | -2.56097500 | -3.34932200 | -3.41680400 |
| C  | 2.13098200  | -4.35998800 | -0.88081800 |
| C  | 2.07503900  | -4.33351300 | 0.66209900  |
| H  | -0.88602900 | -4.33284800 | -2.35535200 |
| H  | -0.41934300 | -2.84811400 | -3.21273900 |
| H  | -3.12775700 | -4.27271800 | -3.24048400 |
| H  | -2.43336300 | -3.22290900 | -4.49642900 |
| H  | 1.44353400  | -5.10080900 | -1.30767800 |
| H  | 3.13446900  | -4.55441300 | -1.27189400 |
| H  | 1.58399700  | -5.21511200 | 1.08515800  |
| H  | 3.07072500  | -4.24034000 | 1.11275000  |

93

**(S)-F**

imaginary frequencies no

E(B3LYP/LanL2DZ(Pd),6-31G(d,p))=-2799.679753

H(B3LYP/LanL2DZ(Pd),6-31G(d,p))=-2799.625265

G(B3LYP/LanL2DZ(Pd),6-31G(d,p))=-2799.778862

|    |             |             |             |
|----|-------------|-------------|-------------|
| P  | -2.03455400 | 0.11005200  | -0.02516000 |
| Pt | 0.32921900  | -0.23502300 | -0.33778100 |
| C  | -2.75711100 | 1.53911800  | -0.93239800 |
| C  | -4.14532200 | 1.77757100  | -0.97686900 |
| C  | -1.91643800 | 2.39989400  | -1.64855100 |
| C  | -4.66492200 | 2.85174800  | -1.68339900 |
| C  | -2.42696200 | 3.48404600  | -2.36885200 |
| C  | -3.80695000 | 3.71670900  | -2.38414100 |
| C  | -3.18073500 | -1.26033800 | -0.47981600 |
| C  | -3.04563000 | -1.85193500 | -1.75146200 |
| C  | -4.19059600 | -1.72990100 | 0.36533500  |
| C  | -3.89810100 | -2.86765900 | -2.15908000 |
| C  | -5.05210400 | -2.75813300 | -0.03102100 |
| C  | -4.90945100 | -3.32963700 | -1.30032600 |
| O  | -4.41502300 | 4.73721700  | -3.04747400 |
| C  | -2.37171000 | 0.40712300  | 1.75882600  |
| C  | -1.83032500 | -0.51349500 | 2.68310900  |
| C  | -3.07779400 | 1.50731700  | 2.25487200  |
| C  | -2.01577800 | -0.34177200 | 4.04635800  |
| C  | -3.25939900 | 1.69618500  | 3.62961500  |
| C  | -2.73195200 | 0.76582400  | 4.53141600  |
| O  | -5.68924900 | -4.33305300 | -1.79199800 |
| O  | -2.85245200 | 0.84321300  | 5.88607100  |
| C  | -6.72840300 | -4.84296000 | -0.97051500 |
| C  | -3.60593000 | 5.63444200  | -3.79516700 |
| C  | -3.56388100 | 1.93993800  | 6.43853800  |
| B  | 0.02068200  | -2.19018300 | -0.51256400 |
| B  | 2.38307400  | 1.94317800  | 0.21754000  |
| H  | -4.82619000 | 1.10611200  | -0.46220700 |
| H  | -0.84611900 | 2.21863100  | -1.65440000 |
| H  | -5.73308400 | 3.03958000  | -1.72150300 |
| H  | -1.74539400 | 4.12338600  | -2.91735000 |
| H  | -2.25394100 | -1.52592400 | -2.41867200 |
| H  | -4.31262900 | -1.29966500 | 1.35399300  |
| H  | -3.80004500 | -3.32488700 | -3.13835800 |
| H  | -5.82019400 | -3.09840400 | 0.65350700  |
| H  | -1.26103100 | -1.36676400 | 2.32362500  |
| H  | -3.49655700 | 2.23849700  | 1.57112300  |
| H  | -1.60638400 | -1.04742400 | 4.76194900  |
| H  | -3.80989400 | 2.56275800  | 3.97673300  |
| H  | -7.46290700 | -4.06730100 | -0.71890600 |

|    |             |             |             |
|----|-------------|-------------|-------------|
| H  | -6.33487000 | -5.27820200 | -0.04297900 |
| H  | -7.21756200 | -5.62425700 | -1.55407400 |
| H  | -3.06189200 | 5.11676000  | -4.59491100 |
| H  | -2.88754100 | 6.16057000  | -3.15394300 |
| H  | -4.29101700 | 6.35927800  | -4.23698200 |
| H  | -4.60788600 | 1.95709000  | 6.10020500  |
| H  | -3.09019600 | 2.89768700  | 6.18763200  |
| H  | -3.53951200 | 1.80052500  | 7.52026300  |
| O  | 2.86387400  | 3.02026400  | 0.93140400  |
| O  | 0.98678800  | 2.05981500  | 0.03636500  |
| O  | 0.03208100  | -2.90953900 | -1.69807200 |
| O  | -0.27323200 | -3.00567000 | 0.57581900  |
| Si | 5.02150200  | 0.76428000  | -0.46104200 |
| C  | 5.70267700  | 2.50969300  | -0.19361900 |
| H  | 5.46383800  | 2.88455500  | 0.80472900  |
| H  | 6.79107900  | 2.50203600  | -0.31442500 |
| H  | 5.28607500  | 3.21193900  | -0.92312700 |
| C  | 3.14230700  | 0.71463500  | -0.28982900 |
| C  | 2.37111200  | -0.39898000 | -0.55084000 |
| C  | 5.56726900  | 0.27093700  | -2.15267900 |
| C  | 5.93928300  | -0.02582500 | -3.27435300 |
| C  | 5.86489900  | -0.40511600 | 0.77322400  |
| C  | 7.16838500  | -0.88514400 | 0.54967800  |
| C  | 5.22969400  | -0.77682200 | 1.97133100  |
| C  | 7.81420700  | -1.69518100 | 1.48518200  |
| H  | 7.68054200  | -0.63211400 | -0.37591500 |
| C  | 5.87014100  | -1.58643000 | 2.91215200  |
| H  | 4.21522600  | -0.43708600 | 2.16555400  |
| C  | 7.16578600  | -2.04657800 | 2.67128700  |
| H  | 8.82065100  | -2.05591800 | 1.28793000  |
| H  | 5.35645300  | -1.86146700 | 3.82991800  |
| H  | 7.66580500  | -2.67884900 | 3.40045900  |
| C  | 6.37339800  | -0.38793100 | -4.61937000 |
| H  | 6.85812500  | -1.37105700 | -4.62865600 |
| H  | 5.52353000  | -0.43057900 | -5.31031400 |
| H  | 7.08989000  | 0.34011300  | -5.01726300 |
| C  | 2.98382800  | -1.70988200 | -0.97650700 |
| H  | 2.47205000  | -2.09477900 | -1.86412800 |
| H  | 4.05646800  | -1.65878800 | -1.18450900 |
| H  | 2.82793300  | -2.45394000 | -0.18375700 |
| C  | 1.78798400  | 3.93334100  | 1.17451100  |
| C  | 0.51560600  | 3.11325900  | 0.90060700  |
| C  | -0.58896600 | -4.31899500 | 0.08876500  |
| C  | -0.15063100 | -4.29879800 | -1.39139600 |

|   |             |             |             |
|---|-------------|-------------|-------------|
| H | 1.88065000  | 4.78912200  | 0.49364800  |
| H | 1.84265600  | 4.29960000  | 2.20381500  |
| H | -0.26886700 | 3.67820800  | 0.39164500  |
| H | 0.10113300  | 2.66869700  | 1.81209600  |
| H | -0.05449800 | -5.06743800 | 0.68231000  |
| H | -1.66657700 | -4.49112400 | 0.19788200  |
| H | 0.79761600  | -4.82724600 | -1.55081300 |
| H | -0.90270600 | -4.72539000 | -2.06243600 |

93

**(S)-TSFO**

imaginary frequencies -113.10

E(B3LYP/LanL2DZ(Pd),6-31G(d,p))=-2799.661244

H(B3LYP/LanL2DZ(Pd),6-31G(d,p))=-2799.606629

G(B3LYP/LanL2DZ(Pd),6-31G(d,p))=-2799.762723

|    |             |             |             |
|----|-------------|-------------|-------------|
| P  | 2.22153200  | 0.17571600  | 0.19218000  |
| Pt | -0.05124800 | 0.17791400  | 0.36040500  |
| C  | 2.95080100  | 1.84182800  | -0.10302500 |
| C  | 4.13536500  | 2.29771600  | 0.50097600  |
| C  | 2.27281400  | 2.71018000  | -0.97051200 |
| C  | 4.62815200  | 3.56991700  | 0.23606300  |
| C  | 2.75908600  | 3.98800300  | -1.24897400 |
| C  | 3.94479700  | 4.42368700  | -0.64243000 |
| C  | 3.08897400  | -0.46279000 | 1.68226600  |
| C  | 2.47415400  | -0.29178400 | 2.93736600  |
| C  | 4.32850700  | -1.11080400 | 1.63424100  |
| C  | 3.08941400  | -0.73264100 | 4.09962400  |
| C  | 4.95673100  | -1.56571600 | 2.79711600  |
| C  | 4.33744000  | -1.37289900 | 4.03811800  |
| O  | 4.50826100  | 5.64971600  | -0.83387300 |
| C  | 2.85483000  | -0.84400200 | -1.20438100 |
| C  | 2.09467400  | -1.94647000 | -1.64034400 |
| C  | 4.06146800  | -0.56886900 | -1.85812100 |
| C  | 2.54452900  | -2.75357000 | -2.67634200 |
| C  | 4.52231200  | -1.37174100 | -2.90555300 |
| C  | 3.76300000  | -2.47404100 | -3.31547300 |
| O  | 4.85446500  | -1.77537800 | 5.23273300  |
| O  | 4.11125000  | -3.32314500 | -4.32356700 |
| C  | 6.10636600  | -2.44320400 | 5.23607400  |
| C  | 3.85223800  | 6.56550900  | -1.69772000 |
| C  | 5.32641100  | -3.08380700 | -5.01627400 |
| B  | -1.26990300 | -1.44984200 | 0.74107800  |
| B  | -2.61494500 | -0.52916100 | -1.84528300 |
| H  | 4.67353900  | 1.65599000  | 1.19148600  |

|    |             |             |             |
|----|-------------|-------------|-------------|
| H  | 1.34555900  | 2.38507400  | -1.43655500 |
| H  | 5.53950400  | 3.92925400  | 0.70314300  |
| H  | 2.20619800  | 4.63049000  | -1.92387300 |
| H  | 1.49430300  | 0.17486700  | 2.98546200  |
| H  | 4.81620600  | -1.28034700 | 0.67933000  |
| H  | 2.61811600  | -0.60740000 | 5.06898600  |
| H  | 5.91311500  | -2.06963600 | 2.72093300  |
| H  | 1.13452500  | -2.14998900 | -1.17485300 |
| H  | 4.65449400  | 0.29161700  | -1.56231100 |
| H  | 1.96548500  | -3.60565700 | -3.01816100 |
| H  | 5.45882700  | -1.12414900 | -3.39138400 |
| H  | 6.90572600  | -1.80831000 | 4.83267200  |
| H  | 6.06810900  | -3.37851200 | 4.66302400  |
| H  | 6.32312000  | -2.67145500 | 6.28073300  |
| H  | 2.84625600  | 6.81310000  | -1.33590100 |
| H  | 3.77906300  | 6.17582300  | -2.72112000 |
| H  | 4.46503600  | 7.46819000  | -1.70059400 |
| H  | 6.19333400  | -3.13906400 | -4.34531600 |
| H  | 5.32218400  | -2.10657000 | -5.51583300 |
| H  | 5.40470800  | -3.87056800 | -5.76816200 |
| O  | -3.44676100 | -1.48607300 | -2.39990900 |
| O  | -1.53673500 | -0.23583000 | -2.64416800 |
| O  | -1.41484100 | -2.03203700 | 1.99978500  |
| O  | -1.39874000 | -2.41291300 | -0.27637600 |
| Si | -4.69251300 | 1.07710100  | -0.55050800 |
| C  | -5.22494700 | 1.32430000  | -2.34786700 |
| H  | -5.34600500 | 0.36142800  | -2.85210700 |
| H  | -6.17799600 | 1.86079900  | -2.38976400 |
| H  | -4.48332500 | 1.91073500  | -2.90132000 |
| C  | -2.99548300 | 0.20449000  | -0.51535200 |
| C  | -2.20820000 | 0.13532200  | 0.60039500  |
| C  | -4.61891100 | 2.74016600  | 0.22538300  |
| C  | -4.58719100 | 3.86052800  | 0.70264800  |
| C  | -5.98147700 | 0.03062800  | 0.35623400  |
| C  | -6.78229300 | 0.55231800  | 1.38677800  |
| C  | -6.17591900 | -1.31475700 | -0.01451500 |
| C  | -7.74494900 | -0.23499800 | 2.02312500  |
| H  | -6.64890100 | 1.58608200  | 1.69510400  |
| C  | -7.13788500 | -2.10295300 | 0.61831400  |
| H  | -5.56626700 | -1.75088000 | -0.80289500 |
| C  | -7.92504500 | -1.56444300 | 1.63925800  |
| H  | -8.35236500 | 0.18936100  | 2.81840500  |
| H  | -7.27333000 | -3.13848300 | 0.31655500  |
| H  | -8.67325200 | -2.17886100 | 2.13311700  |



|   |             |             |             |
|---|-------------|-------------|-------------|
| C | -4.53950800 | 5.19928900  | 1.27991300  |
| H | -5.53366500 | 5.66033000  | 1.29598400  |
| H | -4.16580300 | 5.17336700  | 2.30984800  |
| H | -3.87790900 | 5.85426400  | 0.70170100  |
| C | -2.61979200 | 0.73765100  | 1.93547600  |
| H | -2.06029100 | 0.28739900  | 2.75618900  |
| H | -2.42928600 | 1.81624700  | 1.93863400  |
| H | -3.68820500 | 0.59248300  | 2.13682500  |
| C | -2.77897500 | -2.03436400 | -3.54378600 |
| C | -1.60096700 | -1.06621800 | -3.81134800 |
| C | -1.53681200 | -3.69825400 | 0.33710700  |
| C | -1.81165700 | -3.39411400 | 1.82570700  |
| H | -3.48025400 | -2.09727200 | -4.38201400 |
| H | -2.43161100 | -3.04475200 | -3.29979900 |
| H | -1.77214400 | -0.43161900 | -4.68924000 |
| H | -0.64589400 | -1.58480700 | -3.93738700 |
| H | -2.35358300 | -4.24923600 | -0.14131200 |
| H | -0.60761700 | -4.26721800 | 0.20016900  |
| H | -2.87623100 | -3.49418300 | 2.07457000  |
| H | -1.23717600 | -4.03468000 | 2.50290100  |

93

**(S)-G**

imaginary frequencies no

E(B3LYP/LanL2DZ(Pd),6-31G(d,p))=-2799.690516

H(B3LYP/LanL2DZ(Pd),6-31G(d,p))=-2799.636033

G(B3LYP/LanL2DZ(Pd),6-31G(d,p))=-2799.78833

|    |             |             |             |
|----|-------------|-------------|-------------|
| P  | -1.86085900 | 0.24499200  | -0.02928300 |
| Pt | 0.39458900  | -0.13538600 | -0.10720900 |
| C  | -2.45234600 | 1.79905800  | -0.81694600 |
| C  | -3.76034100 | 1.96730000  | -1.30727600 |
| C  | -1.55555300 | 2.86819200  | -0.93712900 |
| C  | -4.16041100 | 3.16819800  | -1.87852000 |
| C  | -1.94600300 | 4.08174000  | -1.50738600 |
| C  | -3.25535800 | 4.23629600  | -1.97991800 |
| C  | -2.89932300 | -1.06004700 | -0.81278300 |
| C  | -2.49090500 | -1.59225700 | -2.05165000 |
| C  | -4.08577700 | -1.53605800 | -0.24591800 |
| C  | -3.25756500 | -2.54820000 | -2.70254000 |
| C  | -4.86056600 | -2.50941900 | -0.88617700 |
| C  | -4.44902300 | -3.01601100 | -2.12337900 |
| O  | -3.74272300 | 5.36936300  | -2.55942100 |
| C  | -2.45099900 | 0.33209900  | 1.71285400  |
| C  | -1.80056900 | -0.46491800 | 2.67737200  |

|    |             |             |             |
|----|-------------|-------------|-------------|
| C  | -3.50070200 | 1.15677300  | 2.13229000  |
| C  | -2.20631400 | -0.44739400 | 4.00401800  |
| C  | -3.91367700 | 1.18686400  | 3.46764500  |
| C  | -3.26702000 | 0.37833700  | 4.40968400  |
| O  | -5.12195000 | -3.96161100 | -2.83863800 |
| O  | -3.58319900 | 0.32742000  | 5.73452100  |
| C  | -6.33467700 | -4.47105300 | -2.30623800 |
| C  | -2.87070400 | 6.47912100  | -2.70964900 |
| C  | -4.62999900 | 1.15899300  | 6.21019000  |
| B  | 1.54706300  | -2.18323200 | -1.58839800 |
| B  | 2.63954100  | -1.76121000 | 1.18924200  |
| H  | -4.46922600 | 1.14644300  | -1.25342400 |
| H  | -0.53243800 | 2.73948000  | -0.59249400 |
| H  | -5.16599400 | 3.30316700  | -2.26376200 |
| H  | -1.22374500 | 4.88506900  | -1.59115400 |
| H  | -1.55616400 | -1.26305300 | -2.49669700 |
| H  | -4.41837600 | -1.15384000 | 0.71418800  |
| H  | -2.95573200 | -2.95409200 | -3.66297100 |
| H  | -5.77040000 | -2.85874800 | -0.41218100 |
| H  | -0.95786000 | -1.08514700 | 2.38104500  |
| H  | -4.00621200 | 1.79891600  | 1.41785400  |
| H  | -1.70683200 | -1.05420700 | 4.75229100  |
| H  | -4.72631400 | 1.84310300  | 3.75628800  |
| H  | -7.08491600 | -3.68000200 | -2.17946500 |
| H  | -6.17565200 | -4.97126000 | -1.34227300 |
| H  | -6.70033600 | -5.19904200 | -3.03199600 |
| H  | -2.00989400 | 6.23462600  | -3.34495000 |
| H  | -2.50855600 | 6.84423400  | -1.73998800 |
| H  | -3.45985600 | 7.26185500  | -3.18988400 |
| H  | -5.58794200 | 0.91963000  | 5.73065900  |
| H  | -4.40638900 | 2.22180200  | 6.05219400  |
| H  | -4.70683800 | 0.96395000  | 7.28093600  |
| O  | 3.75000200  | -2.58625400 | 1.21812800  |
| O  | 1.78068400  | -2.00752200 | 2.24117600  |
| O  | 0.97155900  | -2.42695000 | -2.82262500 |
| O  | 1.54768000  | -3.30417800 | -0.77614100 |
| Si | 3.55440700  | 0.93259600  | 0.72581400  |
| C  | 3.68240000  | 0.87783600  | 2.61280200  |
| H  | 4.26808900  | 0.01209000  | 2.94069600  |
| H  | 4.17654200  | 1.77861100  | 2.98954400  |
| H  | 2.68831700  | 0.81114600  | 3.06605100  |
| C  | 2.54424800  | -0.57544000 | 0.16264900  |
| C  | 2.18230600  | -0.81217500 | -1.19357400 |
| C  | 2.80264700  | 2.55443500  | 0.28152000  |

|   |             |             |             |
|---|-------------|-------------|-------------|
| C | 2.38569800  | 3.67435500  | 0.04221700  |
| C | 5.28935600  | 0.89750400  | -0.04039800 |
| C | 5.92563300  | 2.07366900  | -0.47581500 |
| C | 5.99579700  | -0.31524600 | -0.16431100 |
| C | 7.21680300  | 2.04625900  | -1.00694200 |
| H | 5.39889800  | 3.02192100  | -0.40711200 |
| C | 7.28654400  | -0.34602600 | -0.69577000 |
| H | 5.53312600  | -1.24647400 | 0.15306900  |
| C | 7.90092700  | 0.83477700  | -1.11797300 |
| H | 7.68623200  | 2.96915500  | -1.33821500 |
| H | 7.81174200  | -1.29375100 | -0.78378900 |
| H | 8.90471400  | 0.81013500  | -1.53417900 |
| C | 1.87332900  | 5.00918700  | -0.24846600 |
| H | 0.86782300  | 5.14524400  | 0.16663700  |
| H | 2.51708500  | 5.78446800  | 0.18276000  |
| H | 1.81923300  | 5.18569800  | -1.32914000 |
| C | 2.56617200  | 0.11613200  | -2.33109800 |
| H | 1.82318700  | 0.07466800  | -3.13198700 |
| H | 2.67817000  | 1.15457100  | -2.01122000 |
| H | 3.52612000  | -0.21024600 | -2.75541700 |
| C | 3.53337100  | -3.58506900 | 2.22090700  |
| C | 2.35298100  | -3.03995500 | 3.05536900  |
| C | 0.72811100  | -4.29646200 | -1.40600400 |
| C | 0.58955100  | -3.80821000 | -2.86527600 |
| H | 4.44656200  | -3.72325900 | 2.80812900  |
| H | 3.28532900  | -4.53251000 | 1.72785000  |
| H | 2.68238100  | -2.60196100 | 4.00595100  |
| H | 1.59603700  | -3.80101400 | 3.26848800  |
| H | 1.21037200  | -5.27566500 | -1.32612500 |
| H | -0.24203000 | -4.33721100 | -0.89622900 |
| H | 1.26117900  | -4.34282700 | -3.54864700 |
| H | -0.43389900 | -3.89581000 | -3.24170900 |

46

**(S)-P**

imaginary frequencies no

E(B3LYP/LanL2DZ(Pd),6-31G(d,p))=-1300.973729

H(B3LYP/LanL2DZ(Pd),6-31G(d,p))=-1300.94607

G(B3LYP/LanL2DZ(Pd),6-31G(d,p))=-1301.037201

|    |             |            |             |
|----|-------------|------------|-------------|
| Si | 1.34898000  | 0.03997900 | 0.88871500  |
| C  | 2.02662700  | 1.67343800 | 1.38519100  |
| C  | 2.47920000  | 2.74737800 | 1.74019700  |
| C  | -0.45142100 | 0.17211100 | 0.28901100  |
| C  | -0.88288700 | 1.01809900 | -0.68455000 |

|   |             |             |             |
|---|-------------|-------------|-------------|
| C | -4.30498900 | 1.64004400  | -2.17219800 |
| C | -4.57497500 | 0.40848700  | -1.27364700 |
| B | -2.38170000 | 1.00878200  | -1.12865700 |
| O | -2.94458200 | 2.00232600  | -1.89596500 |
| O | -3.27821400 | 0.01324300  | -0.80318800 |
| C | -2.25765800 | -2.86595200 | 1.61816500  |
| C | -2.97626100 | -1.72503800 | 2.37771000  |
| B | -1.41454700 | -0.84701800 | 0.98354300  |
| O | -2.24507700 | -0.53975600 | 2.03680900  |
| O | -1.39074300 | -2.19544200 | 0.69188400  |
| C | 2.44173200  | -0.68831000 | -0.47153900 |
| C | 3.69319400  | -0.14076000 | -0.80038600 |
| C | 2.02131500  | -1.83808100 | -1.16739700 |
| C | 4.49941300  | -0.71978500 | -1.78248600 |
| H | 4.03708600  | 0.75211300  | -0.28481600 |
| C | 2.82477700  | -2.42023800 | -2.14803600 |
| H | 1.05307700  | -2.28154600 | -0.94504800 |
| C | 4.06686300  | -1.86178500 | -2.45737600 |
| H | 5.46335400  | -0.27853500 | -2.02175200 |
| H | 2.48104400  | -3.30721900 | -2.67348000 |
| H | 4.69245800  | -2.31337600 | -3.22253200 |
| C | 1.39662300  | -1.08406800 | 2.40838100  |
| H | 0.73069800  | -0.71254800 | 3.19434700  |
| H | 1.08634500  | -2.10110300 | 2.14805100  |
| H | 2.41093800  | -1.13195700 | 2.81581500  |
| C | 0.00103800  | 2.00467300  | -1.41856200 |
| H | -0.45810800 | 2.99978600  | -1.42251500 |
| H | 1.00130300  | 2.09045400  | -0.99117600 |
| H | 0.10283500  | 1.71361500  | -2.47207600 |
| C | 3.01159400  | 4.03759100  | 2.16292800  |
| H | 2.33372100  | 4.52986800  | 2.86912200  |
| H | 3.98294300  | 3.92345700  | 2.65695500  |
| H | 3.14771400  | 4.70896000  | 1.30772300  |
| H | -4.40117600 | 1.40689900  | -3.23891000 |
| H | -4.96081600 | 2.48509800  | -1.94228700 |
| H | -5.03366100 | -0.42307000 | -1.81705100 |
| H | -5.20676100 | 0.65319700  | -0.41203500 |
| H | -2.94988500 | -3.51100300 | 1.06837700  |
| H | -4.01619800 | -1.60599500 | 2.05172500  |
| H | -1.65242400 | -3.49374600 | 2.28288000  |
| H | -2.96515400 | -1.86167900 | 3.46347900  |

70

PtL1

imaginary frequencies no

E(B3LYP/LanL2DZ(Pd),6-31G(d,p))=-2162.103513

H(B3LYP/LanL2DZ(Pd),6-31G(d,p))=-2162.067015

G(B3LYP/LanL2DZ(Pd),6-31G(d,p))=-2162.175879

|   |             |             |             |
|---|-------------|-------------|-------------|
| C | 2.23187000  | 0.48012300  | -0.43217400 |
| C | 1.36226300  | 1.09485500  | 0.46578600  |
| C | 1.15128200  | 2.51402500  | 0.41360600  |
| C | 1.79223700  | 3.28336300  | -0.61060700 |
| C | 2.63901700  | 2.61810000  | -1.53446300 |
| C | 2.85639500  | 1.26643800  | -1.43901500 |
| H | -0.15175500 | 2.63477700  | 2.14134100  |
| C | 0.32931100  | 3.20062700  | 1.35060600  |
| C | 1.57438800  | 4.68569900  | -0.66961200 |
| H | 3.12560600  | 3.19930700  | -2.31375200 |
| H | 3.52905000  | 0.77642700  | -2.13571700 |
| C | 0.76909100  | 5.31718200  | 0.25125400  |
| C | 0.14635400  | 4.56424400  | 1.27438500  |
| H | 2.06223500  | 5.25407800  | -1.45751600 |
| H | 0.61356900  | 6.39082000  | 0.19797000  |
| H | -0.48061400 | 5.06675300  | 2.00573100  |
| C | 0.71177800  | 0.28944400  | 1.55340200  |
| C | 1.39251100  | 0.22842100  | 2.82531300  |
| C | -0.46865600 | -0.43207900 | 1.37632000  |
| C | 2.59287300  | 0.95348100  | 3.07557200  |
| C | 0.87239100  | -0.58899000 | 3.87963400  |
| C | -0.94924600 | -1.26623800 | 2.43408700  |
| C | 3.22996900  | 0.87866300  | 4.29540400  |
| H | 3.00420900  | 1.57813000  | 2.29164100  |
| C | 1.55124600  | -0.64562600 | 5.12493100  |
| C | -0.30778500 | -1.33959700 | 3.64132000  |
| H | -1.83938500 | -1.86352000 | 2.27047400  |
| C | 2.70676900  | 0.07280900  | 5.33295700  |
| H | 4.14152900  | 1.44528200  | 4.46185900  |
| H | 1.14058400  | -1.27264800 | 5.91207800  |
| H | -0.69450000 | -1.98197700 | 4.42808200  |
| H | 3.21888100  | 0.02160600  | 6.28936400  |
| C | 2.50994500  | -1.01868600 | -0.37815400 |
| H | 2.30485400  | -1.38238600 | 0.63276400  |
| H | 1.78138300  | -1.53534000 | -1.02072600 |
| C | 3.91788800  | -1.42250400 | -0.77052600 |
| C | 5.00287000  | -1.12192100 | 0.06741200  |
| C | 4.16952400  | -2.11120700 | -1.96341100 |
| C | 6.29985900  | -1.49788300 | -0.27855600 |
| H | 4.82285300  | -0.59256300 | 1.00008900  |

|    |             |             |             |
|----|-------------|-------------|-------------|
| C  | 5.46817300  | -2.49005800 | -2.31425400 |
| H  | 3.33900900  | -2.35730000 | -2.62094600 |
| C  | 6.53759300  | -2.18364100 | -1.47294700 |
| H  | 7.12643700  | -1.25961100 | 0.38539700  |
| H  | 5.64130400  | -3.02646800 | -3.24321500 |
| H  | 7.54780700  | -2.47878400 | -1.74212000 |
| Pt | -1.00632900 | -2.43830600 | -1.19868900 |
| C  | -1.34374200 | 0.89864500  | -1.25549000 |
| C  | -1.98553300 | 2.10421500  | -0.92839700 |
| C  | -0.67454000 | 0.80020800  | -2.48528600 |
| C  | -1.94440400 | 3.19358200  | -1.79524800 |
| H  | -2.53163900 | 2.20215200  | 0.00257200  |
| C  | -0.62632700 | 1.88138000  | -3.36265400 |
| H  | -0.20353600 | -0.14085800 | -2.75184300 |
| C  | -1.26129900 | 3.06288200  | -2.99903200 |
| H  | -2.42975500 | 4.13201900  | -1.55185100 |
| H  | -0.11285600 | 1.81746700  | -4.31571300 |
| C  | -3.20881100 | -0.50092300 | 0.42337600  |
| C  | -3.58921100 | 0.29044100  | 1.52020400  |
| C  | -4.20198100 | -1.19754800 | -0.28326100 |
| C  | -4.92716500 | 0.39261300  | 1.90029200  |
| H  | -2.83892700 | 0.82075500  | 2.09809600  |
| C  | -5.54350900 | -1.10234200 | 0.08321700  |
| H  | -3.90818200 | -1.82531000 | -1.11937100 |
| C  | -5.88335800 | -0.30566900 | 1.17081600  |
| H  | -5.23346500 | 0.99560200  | 2.74831500  |
| H  | -6.31891200 | -1.63833100 | -0.45329900 |
| P  | -1.46408800 | -0.59804000 | -0.18584300 |
| F  | -1.22323200 | 4.11240300  | -3.84403400 |
| F  | -7.17687800 | -0.21248900 | 1.53568400  |

116

**cplx2-cis-s**

imaginary frequencies no

E(B3LYP/LanL2DZ(Pd),6-31G(d,p))=-3463.051817

H(B3LYP/LanL2DZ(Pd),6-31G(d,p))=-3462.98615

G(B3LYP/LanL2DZ(Pd),6-31G(d,p))=-3463.161776

|   |             |            |             |
|---|-------------|------------|-------------|
| B | -1.08692100 | 2.06611200 | -1.52085100 |
| O | -0.46740600 | 3.25697500 | -1.87081100 |
| C | -0.39179700 | 3.33608400 | -3.30346500 |
| C | -1.27956700 | 2.17597400 | -3.80461400 |
| B | -2.47393500 | 2.74835500 | 0.07742200  |
| O | -3.59563600 | 2.90635200 | -0.72702600 |
| C | -4.13974300 | 4.21759800 | -0.50471100 |

|    |             |             |             |
|----|-------------|-------------|-------------|
| O  | -1.52564600 | 1.37447500  | -2.63973100 |
| O  | -2.30509200 | 3.83519600  | 0.92436900  |
| C  | -3.41695000 | 4.72848800  | 0.75852700  |
| C  | -5.60497900 | 1.24511800  | 1.48772000  |
| H  | -5.44121900 | 1.97524600  | 0.69204500  |
| H  | -6.67270500 | 1.00651500  | 1.52796600  |
| H  | -5.31597900 | 1.69119500  | 2.44492500  |
| C  | -2.78084000 | -0.01399300 | 1.27954900  |
| C  | -1.69399600 | -0.39378000 | 1.83556000  |
| C  | -5.01282900 | -1.03330700 | -0.55509000 |
| C  | -5.94868200 | -2.07530100 | -0.68484000 |
| C  | -4.41122700 | -0.53287300 | -1.72582300 |
| C  | -6.28255500 | -2.59603100 | -1.93666600 |
| H  | -6.41240000 | -2.49331000 | 0.20506900  |
| C  | -4.73979400 | -1.05681900 | -2.97815300 |
| H  | -3.67687900 | 0.26470200  | -1.66901200 |
| C  | -5.67755300 | -2.08675900 | -3.08770500 |
| H  | -7.00919900 | -3.40085500 | -2.01288500 |
| H  | -4.25888100 | -0.65889200 | -3.86774100 |
| H  | -5.93440600 | -2.49077900 | -4.06369000 |
| H  | 0.65439600  | 3.22237200  | -3.60845000 |
| H  | -0.74565100 | 4.31834800  | -3.63206900 |
| H  | -2.23900100 | 2.52638800  | -4.20339400 |
| H  | -0.78499200 | 1.56692800  | -4.56752400 |
| H  | -3.04799500 | 5.75340700  | 0.65341300  |
| H  | -3.93487200 | 4.84004900  | -1.38372100 |
| H  | -4.05277700 | 4.67791400  | 1.65025300  |
| C  | -1.12060100 | -1.25690900 | 2.89492400  |
| H  | -0.25728800 | -1.82652400 | 2.54527400  |
| H  | -0.77523800 | -0.64811100 | 3.73663900  |
| H  | -1.88352600 | -1.95362400 | 3.26001500  |
| H  | -5.22410900 | 4.14485400  | -0.37685800 |
| Si | -4.60373000 | -0.31231600 | 1.13959700  |
| C  | -5.01925500 | -1.56832100 | 2.41663500  |
| C  | -5.29187400 | -2.39607900 | 3.26818500  |
| C  | -5.61956000 | -3.38920400 | 4.28528000  |
| H  | -5.22811700 | -4.37632500 | 4.01453600  |
| H  | -5.19364700 | -3.11550200 | 5.25727400  |
| H  | -6.70410100 | -3.48303400 | 4.41202200  |
| C  | 2.01668700  | -2.67867200 | -0.66523800 |
| C  | 2.95622200  | -1.83025600 | -0.07962900 |
| C  | 4.20953900  | -1.58056900 | -0.73108700 |
| C  | 4.46774000  | -2.17151900 | -2.01126300 |
| C  | 3.47922300  | -3.00721600 | -2.58734100 |

|   |             |             |             |
|---|-------------|-------------|-------------|
| C | 2.29711700  | -3.25480400 | -1.93162900 |
| H | 5.06015000  | -0.33742800 | 0.82817500  |
| C | 5.22883200  | -0.77319200 | -0.15076900 |
| C | 5.70540800  | -1.91691800 | -2.66173200 |
| H | 3.67251000  | -3.45881300 | -3.55723600 |
| H | 1.55725100  | -3.90628800 | -2.38294000 |
| C | 6.66434200  | -1.12434000 | -2.07437400 |
| C | 6.42231800  | -0.55306000 | -0.80206600 |
| H | 5.88194000  | -2.36676100 | -3.63556700 |
| H | 7.60783300  | -0.93977900 | -2.57984500 |
| H | 7.18639000  | 0.06262100  | -0.33567600 |
| C | 2.72565500  | -1.27499100 | 1.29904600  |
| C | 3.21393200  | -2.07907000 | 2.39907000  |
| C | 2.08634600  | -0.06467600 | 1.57137800  |
| C | 3.88379000  | -3.31873600 | 2.18981500  |
| C | 3.03812200  | -1.63860500 | 3.74976400  |
| C | 1.90060800  | 0.33516700  | 2.93331900  |
| C | 4.34731000  | -4.06890100 | 3.24910400  |
| H | 4.03155200  | -3.67333300 | 1.17686800  |
| C | 3.52754600  | -2.43161700 | 4.82032900  |
| C | 2.36493500  | -0.41201600 | 3.98140800  |
| H | 1.37533400  | 1.26149900  | 3.14073800  |
| C | 4.17041000  | -3.62459600 | 4.57938400  |
| H | 4.85529000  | -5.01003700 | 3.05928600  |
| H | 3.38261900  | -2.07663300 | 5.83746500  |
| H | 2.21554600  | -0.07372700 | 5.00356400  |
| H | 4.54105700  | -4.22462400 | 5.40534400  |
| C | 0.70696500  | -2.98776500 | 0.06153000  |
| H | 0.95965900  | -3.40787300 | 1.04387100  |
| H | 0.19164900  | -2.04310700 | 0.26836200  |
| C | -0.26138800 | -3.92047800 | -0.63622400 |
| C | -0.05768300 | -5.30858900 | -0.62840800 |
| C | -1.39532200 | -3.41526400 | -1.28603700 |
| C | -0.95702500 | -6.16701600 | -1.26136500 |
| H | 0.81240400  | -5.71777200 | -0.11969100 |
| C | -2.30152200 | -4.27140600 | -1.91631100 |
| H | -1.58594900 | -2.34510500 | -1.28215600 |
| C | -2.08205500 | -5.64956600 | -1.90831000 |
| H | -0.78364600 | -7.23970300 | -1.24303000 |
| H | -3.18094100 | -3.85636900 | -2.39987600 |
| H | -2.78679100 | -6.31812100 | -2.39500600 |
| C | 2.03807900  | 0.99523600  | -1.28828400 |
| C | 3.15918400  | 1.74170600  | -1.68220800 |
| C | 1.40736900  | 0.17911300  | -2.24216600 |



|    |             |             |             |
|----|-------------|-------------|-------------|
| C  | 3.65308500  | 1.66550900  | -2.98451500 |
| H  | 3.65188800  | 2.40170000  | -0.97900500 |
| C  | 1.89351000  | 0.08593600  | -3.54462000 |
| H  | 0.51865900  | -0.38037300 | -1.97418800 |
| C  | 3.01381600  | 0.83180900  | -3.89323100 |
| H  | 4.52034000  | 2.23728200  | -3.29599900 |
| H  | 1.41883600  | -0.55313800 | -4.28073300 |
| C  | 1.93594600  | 2.73747000  | 1.03183400  |
| C  | 3.26243800  | 2.86105100  | 1.48453300  |
| C  | 1.10404600  | 3.86638700  | 1.06177000  |
| C  | 3.75481600  | 4.08128600  | 1.94215900  |
| H  | 3.91844300  | 1.99650200  | 1.49276400  |
| C  | 1.58528400  | 5.09380800  | 1.52018900  |
| H  | 0.07378900  | 3.78902600  | 0.73792600  |
| C  | 2.90258800  | 5.18155500  | 1.94963100  |
| H  | 4.77496900  | 4.18808800  | 2.29496000  |
| H  | 0.94827000  | 5.97093400  | 1.55327100  |
| P  | 1.27146000  | 1.13529100  | 0.38842200  |
| F  | 3.48656500  | 0.75137200  | -5.15406300 |
| F  | 3.37201400  | 6.36388200  | 2.39635400  |
| Pt | -1.20373500 | 1.12965800  | 0.35062900  |

116

**TSCD-cis-s**

imaginary frequencies -211.55

E(B3LYP/LanL2DZ(Pd),6-31G(d,p))=-3463.037456

H(B3LYP/LanL2DZ(Pd),6-31G(d,p))=-3462.972851

G(B3LYP/LanL2DZ(Pd),6-31G(d,p))=-3463.144702

|   |             |             |             |
|---|-------------|-------------|-------------|
| B | -1.07315900 | -2.44449200 | 1.44808900  |
| O | -0.91392300 | -3.82762400 | 1.49724800  |
| C | -0.92430700 | -4.25923700 | 2.86663600  |
| C | -1.36588400 | -3.01437200 | 3.66535700  |
| B | -2.92988600 | -2.25130600 | -0.44920600 |
| O | -3.89266500 | -2.48205200 | 0.53169600  |
| C | -4.49766400 | -3.75429500 | 0.26114100  |
| O | -1.29261100 | -1.93355900 | 2.72521300  |
| O | -2.99156000 | -3.19870500 | -1.46142200 |
| C | -4.09044700 | -4.07752500 | -1.19120900 |
| C | -6.07070900 | -0.74235200 | -0.97047200 |
| H | -6.14920300 | -1.47138500 | -0.16238900 |
| H | -6.98267000 | -0.13615500 | -0.97826600 |
| H | -6.01220300 | -1.27184800 | -1.92715900 |
| C | -2.92193400 | -0.40050000 | -1.15456000 |
| C | -1.88032000 | 0.06325600  | -1.78878600 |

|    |             |             |             |
|----|-------------|-------------|-------------|
| C  | -4.52782500 | 1.12674400  | 1.00676800  |
| C  | -5.27029200 | 2.28738300  | 1.29356300  |
| C  | -3.77822200 | 0.54697500  | 2.04767700  |
| C  | -5.27653400 | 2.84450500  | 2.57394100  |
| H  | -5.83937800 | 2.77173600  | 0.50394600  |
| C  | -3.77676100 | 1.10814600  | 3.32693400  |
| H  | -3.18367700 | -0.34218100 | 1.86875600  |
| C  | -4.52737500 | 2.25510200  | 3.59479800  |
| H  | -5.86130700 | 3.73905900  | 2.77258200  |
| H  | -3.18450700 | 0.64414700  | 4.11090400  |
| H  | -4.52709100 | 2.68885200  | 4.59145300  |
| H  | 0.08185700  | -4.59650500 | 3.14322600  |
| H  | -1.61216600 | -5.10374200 | 2.97993500  |
| H  | -2.39516300 | -3.09912500 | 4.03443200  |
| H  | -0.70954600 | -2.80408200 | 4.51642800  |
| H  | -3.77015000 | -5.11568500 | -1.32162000 |
| H  | -4.10213000 | -4.49079700 | 0.97062700  |
| H  | -4.89901200 | -3.87175200 | -1.90414100 |
| C  | -1.52777700 | 1.00013400  | -2.87781700 |
| H  | -0.62726000 | 1.57277200  | -2.64518900 |
| H  | -1.30242900 | 0.42174400  | -3.78248900 |
| H  | -2.35387100 | 1.68317800  | -3.10375500 |
| H  | -5.58146200 | -3.68405700 | 0.39739100  |
| Si | -4.57999200 | 0.38942200  | -0.73017500 |
| C  | -4.79347800 | 1.77192300  | -1.92411100 |
| C  | -4.99677600 | 2.69408900  | -2.69433700 |
| C  | -5.23195200 | 3.80195000  | -3.61389900 |
| H  | -4.58746500 | 4.65575300  | -3.37669000 |
| H  | -5.02944500 | 3.50564000  | -4.64935300 |
| H  | -6.27213500 | 4.14302400  | -3.56321200 |
| C  | 1.68899800  | 2.38765700  | 0.91563600  |
| C  | 2.71423900  | 1.75090900  | 0.22136500  |
| C  | 4.01340200  | 1.61133100  | 0.82222000  |
| C  | 4.22959400  | 2.09179200  | 2.15415000  |
| C  | 3.15214000  | 2.70965500  | 2.84130000  |
| C  | 1.92928800  | 2.85501300  | 2.23772900  |
| H  | 4.97068200  | 0.66041100  | -0.87364000 |
| C  | 5.11244300  | 1.01907300  | 0.14010000  |
| C  | 5.51128500  | 1.94943000  | 2.74895800  |
| H  | 3.31423800  | 3.07619500  | 3.85188700  |
| H  | 1.11960200  | 3.35054500  | 2.76474800  |
| C  | 6.55169200  | 1.36728400  | 2.06042700  |
| C  | 6.34743000  | 0.90254200  | 0.74052500  |
| H  | 5.65625500  | 2.31364800  | 3.76295400  |

|   |             |             |             |
|---|-------------|-------------|-------------|
| H | 7.52807700  | 1.26653500  | 2.52549400  |
| H | 7.17167300  | 0.45019600  | 0.19606000  |
| C | 2.52106400  | 1.30783100  | -1.20263900 |
| C | 2.91215900  | 2.24801300  | -2.22907200 |
| C | 1.98169200  | 0.07531600  | -1.57458600 |
| C | 3.47772200  | 3.51798100  | -1.91672000 |
| C | 2.73558200  | 1.92065200  | -3.61145100 |
| C | 1.78323900  | -0.20890700 | -2.96246800 |
| C | 3.84713100  | 4.39981500  | -2.90972600 |
| H | 3.62293000  | 3.78981700  | -0.87824400 |
| C | 3.12630300  | 2.84887200  | -4.61198900 |
| C | 2.15440900  | 0.67051300  | -3.94393400 |
| H | 1.32305400  | -1.14871300 | -3.24668800 |
| C | 3.67211500  | 4.06582000  | -4.27242600 |
| H | 4.27917200  | 5.35978200  | -2.64217400 |
| H | 2.98273500  | 2.57851400  | -5.65501600 |
| H | 1.99884400  | 0.41985100  | -4.99016600 |
| H | 3.96733300  | 4.76949000  | -5.04526800 |
| C | 0.30069000  | 2.58422000  | 0.31956800  |
| H | 0.35035500  | 2.42225700  | -0.76019900 |
| H | -0.36686900 | 1.80239300  | 0.70445500  |
| C | -0.32460600 | 3.94125600  | 0.59067900  |
| C | 0.23964400  | 5.10802200  | 0.05189200  |
| C | -1.48641500 | 4.05504200  | 1.36397100  |
| C | -0.34143700 | 6.35396900  | 0.28273400  |
| H | 1.13722200  | 5.03484100  | -0.55764700 |
| C | -2.07134100 | 5.30308300  | 1.59554600  |
| H | -1.94502100 | 3.16209400  | 1.78061600  |
| C | -1.50031300 | 6.45613200  | 1.05775900  |
| H | 0.10783800  | 7.24656300  | -0.14465600 |
| H | -2.97661800 | 5.36458700  | 2.19268800  |
| H | -1.95410300 | 7.42711200  | 1.23632900  |
| C | 2.21630800  | -1.26757300 | 1.14245100  |
| C | 3.48796500  | -1.85083900 | 1.26394900  |
| C | 1.59823800  | -0.75434300 | 2.29375700  |
| C | 4.13477100  | -1.91286700 | 2.49661400  |
| H | 3.98228100  | -2.27639500 | 0.39894400  |
| C | 2.23469000  | -0.80686800 | 3.53241500  |
| H | 0.60203700  | -0.33430500 | 2.23165100  |
| C | 3.49588400  | -1.38426900 | 3.61171100  |
| H | 5.11742800  | -2.35939700 | 2.60018300  |
| H | 1.76500300  | -0.41061500 | 4.42582100  |
| C | 1.85471300  | -2.79730400 | -1.28043900 |
| C | 3.09865300  | -2.88762100 | -1.93057600 |

|    |             |             |             |
|----|-------------|-------------|-------------|
| C  | 1.03858900  | -3.93844700 | -1.22424600 |
| C  | 3.52480100  | -4.08356800 | -2.50539400 |
| H  | 3.73899800  | -2.01488500 | -2.00956200 |
| C  | 1.45514400  | -5.14166200 | -1.79487800 |
| H  | 0.07763400  | -3.88738600 | -0.72581100 |
| C  | 2.69148400  | -5.19465000 | -2.42529200 |
| H  | 4.47997300  | -4.16251000 | -3.01331300 |
| H  | 0.83119800  | -6.02805600 | -1.75817700 |
| P  | 1.28425500  | -1.24595000 | -0.45103300 |
| F  | 4.11395900  | -1.44507600 | 4.80907000  |
| F  | 3.09682600  | -6.35328200 | -2.98264500 |
| Pt | -1.06651300 | -1.23614700 | -0.26538900 |

116

**D-cis-s**

imaginary frequencies no

E(B3LYP/LanL2DZ(Pd),6-31G(d,p))=-3463.052565

H(B3LYP/LanL2DZ(Pd),6-31G(d,p))=-3462.987429

G(B3LYP/LanL2DZ(Pd),6-31G(d,p))=-3463.163753

|   |            |             |             |
|---|------------|-------------|-------------|
| B | 1.63530100 | -1.68833200 | -1.87827300 |
| O | 1.73505700 | -3.03945900 | -2.19729600 |
| C | 1.97178300 | -3.18425100 | -3.60783700 |
| C | 2.26223300 | -1.75199000 | -4.10252200 |
| B | 3.67169000 | -1.57470200 | 1.19488300  |
| O | 4.61223300 | -2.38676100 | 0.58291800  |
| C | 4.79113900 | -3.55283700 | 1.39590000  |
| O | 1.89121700 | -0.90403800 | -3.00285600 |
| O | 3.14742500 | -2.15710700 | 2.33937300  |
| C | 3.61365000 | -3.51049900 | 2.39349500  |
| C | 5.43822300 | -0.26253300 | -1.56307800 |
| H | 4.62949700 | -0.53986400 | -2.24706600 |
| H | 6.19984000 | 0.28150700  | -2.13111800 |
| H | 5.87014100 | -1.17880900 | -1.15735400 |
| C | 3.38654600 | -0.09418300 | 0.76747400  |
| C | 2.23320200 | 0.52252800  | 1.25589200  |
| C | 4.10036700 | 2.42179400  | -0.98883200 |
| C | 4.59350100 | 3.68995000  | -0.63420900 |
| C | 3.14459800 | 2.35298600  | -2.02254800 |
| C | 4.15234600 | 4.84765500  | -1.27942000 |
| H | 5.33857900 | 3.77010300  | 0.15318100  |
| C | 2.70405800 | 3.50877600  | -2.67186900 |
| H | 2.74411800 | 1.39128900  | -2.33543000 |
| C | 3.20665100 | 4.75932100  | -2.30193100 |
| H | 4.55036100 | 5.81608800  | -0.98763700 |

|    |             |             |             |
|----|-------------|-------------|-------------|
| H  | 1.97627800  | 3.43162600  | -3.47602100 |
| H  | 2.86925100  | 5.65707100  | -2.81363300 |
| H  | 1.07844000  | -3.61369200 | -4.07695700 |
| H  | 2.81055600  | -3.86863400 | -3.76831900 |
| H  | 3.32381600  | -1.59823300 | -4.33008200 |
| H  | 1.67648700  | -1.48047800 | -4.98660400 |
| H  | 2.79873600  | -4.18247400 | 2.09704900  |
| H  | 4.78227300  | -4.44520800 | 0.76298600  |
| H  | 3.91130000  | -3.75431100 | 3.41804700  |
| C  | 2.07044000  | 1.89870400  | 1.78597700  |
| H  | 1.16202200  | 2.37487200  | 1.40760900  |
| H  | 1.92913600  | 1.79215100  | 2.87210900  |
| H  | 2.93174800  | 2.55802000  | 1.62616000  |
| H  | 5.76425100  | -3.49169700 | 1.89933200  |
| Si | 4.75262900  | 0.83204200  | -0.19197900 |
| C  | 6.09305100  | 1.29386000  | 0.97786300  |
| C  | 6.97484500  | 1.58888200  | 1.76557100  |
| C  | 8.03467800  | 1.93787100  | 2.70512800  |
| H  | 7.63930200  | 2.50219900  | 3.55739000  |
| H  | 8.52447200  | 1.03986900  | 3.09850700  |
| H  | 8.80377900  | 2.55329700  | 2.22457500  |
| C  | -2.73461500 | 2.09055600  | -0.43853500 |
| C  | -3.30870800 | 0.99343700  | 0.19743000  |
| C  | -4.53740000 | 0.43732600  | -0.29636100 |
| C  | -5.13682600 | 0.98723100  | -1.47560300 |
| C  | -4.50937100 | 2.09019000  | -2.11142200 |
| C  | -3.35320500 | 2.62430400  | -1.60287700 |
| H  | -4.76778600 | -1.06196000 | 1.25084600  |
| C  | -5.19701400 | -0.64782800 | 0.34464100  |
| C  | -6.34152600 | 0.42381600  | -1.97333200 |
| H  | -4.96429100 | 2.51104800  | -3.00454100 |
| H  | -2.89387100 | 3.48189000  | -2.08530900 |
| C  | -6.94743700 | -0.63400100 | -1.33333700 |
| C  | -6.36949200 | -1.16925100 | -0.15849900 |
| H  | -6.78008100 | 0.84786100  | -2.87312500 |
| H  | -7.86984700 | -1.05469800 | -1.72312300 |
| H  | -6.85580800 | -1.99599400 | 0.35175800  |
| C  | -2.70657400 | 0.45951600  | 1.46678100  |
| C  | -3.19251000 | 1.03192100  | 2.70418000  |
| C  | -1.68829000 | -0.49012100 | 1.51236300  |
| C  | -4.25214000 | 1.98284400  | 2.73295800  |
| C  | -2.60719400 | 0.64807700  | 3.95256600  |
| C  | -1.09354600 | -0.82627600 | 2.77057300  |
| C  | -4.70408400 | 2.51417300  | 3.92265300  |

|   |             |             |             |
|---|-------------|-------------|-------------|
| H | -4.71632500 | 2.28430500  | 1.80161800  |
| C | -3.09044700 | 1.21503100  | 5.16025200  |
| C | -1.53769200 | -0.28567500 | 3.94570000  |
| H | -0.25364300 | -1.51335200 | 2.78648000  |
| C | -4.11896500 | 2.13037500  | 5.15045600  |
| H | -5.51901100 | 3.23224900  | 3.91558200  |
| H | -2.62891900 | 0.91200300  | 6.09656100  |
| H | -1.06830900 | -0.56119300 | 4.88645800  |
| H | -4.48144300 | 2.55771000  | 6.08084100  |
| C | -1.44124800 | 2.73028400  | 0.05066000  |
| H | -1.21984100 | 2.36698200  | 1.05788800  |
| H | -0.61298100 | 2.37964200  | -0.57968600 |
| C | -1.44274200 | 4.24959700  | 0.05609900  |
| C | -2.35197100 | 4.96218800  | 0.85317400  |
| C | -0.52067500 | 4.97036300  | -0.71216900 |
| C | -2.34100700 | 6.35588900  | 0.87585900  |
| H | -3.06696100 | 4.41803900  | 1.46484800  |
| C | -0.50720200 | 6.36763900  | -0.69039100 |
| H | 0.20443100  | 4.43579200  | -1.32039100 |
| C | -1.41884200 | 7.06523300  | 0.10115800  |
| H | -3.05077100 | 6.89043000  | 1.50152600  |
| H | 0.22072600  | 6.90691100  | -1.29031500 |
| H | -1.41000200 | 8.15143200  | 0.11978500  |
| C | -1.80253800 | -1.30464600 | -1.45361000 |
| C | -2.87170200 | -2.17296000 | -1.72471400 |
| C | -1.38208900 | -0.41338500 | -2.45368400 |
| C | -3.51955100 | -2.14592000 | -2.95839700 |
| H | -3.20221700 | -2.88428500 | -0.97686800 |
| C | -2.02569800 | -0.37058800 | -3.68847900 |
| H | -0.52672300 | 0.22941100  | -2.27586900 |
| C | -3.08596400 | -1.23981500 | -3.91853200 |
| H | -4.34816700 | -2.80942900 | -3.17900100 |
| H | -1.71111400 | 0.31367100  | -4.46875900 |
| C | -1.07210100 | -3.15722200 | 0.63787500  |
| C | -2.14234800 | -3.55709100 | 1.45513500  |
| C | -0.17463800 | -4.13342600 | 0.17223700  |
| C | -2.31718900 | -4.89520800 | 1.80810200  |
| H | -2.84482000 | -2.82200700 | 1.83194800  |
| C | -0.34069400 | -5.47443500 | 0.51837100  |
| H | 0.64560000  | -3.85057500 | -0.47857400 |
| C | -1.40787200 | -5.83313800 | 1.33366800  |
| H | -3.13752900 | -5.21322300 | 2.44250100  |
| H | 0.34398700  | -6.23749600 | 0.16359800  |
| P | -0.84216000 | -1.39559700 | 0.11376100  |

|    |             |             |             |
|----|-------------|-------------|-------------|
| F  | -3.70577600 | -1.21036700 | -5.11590400 |
| F  | -1.56683500 | -7.12760800 | 1.67511200  |
| Pt | 1.35972800  | -0.80331900 | -0.00465600 |

116

**cplx2-cis-r**

imaginary frequencies no

E(B3LYP/LanL2DZ(Pd),6-31G(d,p))=-3463.053258

H(B3LYP/LanL2DZ(Pd),6-31G(d,p))=-3462.987784

G(B3LYP/LanL2DZ(Pd),6-31G(d,p))=-3463.162965

|    |             |             |             |
|----|-------------|-------------|-------------|
| B  | 1.06747100  | -1.50982000 | -1.93132100 |
| O  | 0.80276600  | -2.85816600 | -2.12750500 |
| C  | 0.43594300  | -3.06068300 | -3.50177700 |
| C  | 0.77858500  | -1.72491200 | -4.19612100 |
| B  | 2.91579300  | -1.60488400 | -0.70403400 |
| O  | 3.85589000  | -1.39861300 | -1.69969200 |
| C  | 4.92028200  | -2.35389100 | -1.54542900 |
| O  | 0.99730800  | -0.80066500 | -3.12040500 |
| O  | 3.25875500  | -2.66931300 | 0.11258600  |
| C  | 4.48196300  | -3.25273300 | -0.36440800 |
| C  | 2.65406000  | 1.10452600  | 0.45537900  |
| C  | 1.62405600  | 1.25121900  | 1.19780000  |
| H  | -0.63402100 | -3.29177200 | -3.55072400 |
| H  | 0.99559100  | -3.90989400 | -3.90627600 |
| H  | 1.69209800  | -1.78961700 | -4.79929700 |
| H  | -0.03369200 | -1.35996200 | -4.83253300 |
| H  | 4.28558000  | -4.28608200 | -0.67246100 |
| H  | 5.03690400  | -2.91063100 | -2.48115000 |
| H  | 5.21551000  | -3.25928900 | 0.44668500  |
| C  | 1.05121600  | 2.03860000  | 2.31555300  |
| H  | 1.07667800  | 1.45660800  | 3.24247100  |
| H  | 1.63494900  | 2.95390900  | 2.46519900  |
| H  | 0.00672800  | 2.30803700  | 2.14482500  |
| H  | 5.84936200  | -1.81578400 | -1.33665800 |
| Si | 4.30125600  | 1.75352200  | -0.08026700 |
| C  | 4.49086900  | 3.38704100  | 0.74145700  |
| C  | 4.61355300  | 4.47138500  | 1.28345000  |
| C  | 4.76394500  | 5.77145800  | 1.92746000  |
| H  | 3.91744800  | 6.42800700  | 1.69615100  |
| H  | 4.82117100  | 5.66986500  | 3.01721500  |
| H  | 5.67772400  | 6.27482100  | 1.59165500  |
| C  | -2.98002700 | 2.15729800  | -0.57861300 |
| C  | -3.48782200 | 1.17819400  | 0.27443200  |
| C  | -4.74482200 | 0.54878600  | -0.01625400 |

|   |             |             |             |
|---|-------------|-------------|-------------|
| C | -5.45339200 | 0.90530300  | -1.20993200 |
| C | -4.89882300 | 1.89365300  | -2.06055300 |
| C | -3.70582300 | 2.49999400  | -1.75023300 |
| H | -4.82461500 | -0.68515800 | 1.76435700  |
| C | -5.33498900 | -0.41898300 | 0.84521000  |
| C | -6.69207800 | 0.27386300  | -1.50364700 |
| H | -5.43592900 | 2.17199100  | -2.96391600 |
| H | -3.30083600 | 3.25909500  | -2.41035500 |
| C | -7.22796600 | -0.66427000 | -0.65171000 |
| C | -6.54172700 | -1.00731000 | 0.53759600  |
| H | -7.21164000 | 0.55120200  | -2.41739300 |
| H | -8.17709700 | -1.13802400 | -0.88505200 |
| H | -6.97289000 | -1.74004800 | 1.21405400  |
| C | -2.81232600 | 0.86319600  | 1.58127100  |
| C | -3.23888400 | 1.64511800  | 2.72172200  |
| C | -1.84419900 | -0.12694200 | 1.75636100  |
| C | -4.22252300 | 2.66985500  | 2.61174400  |
| C | -2.67746200 | 1.40006700  | 4.01577700  |
| C | -1.28292500 | -0.33051700 | 3.05716200  |
| C | -4.61890500 | 3.40179900  | 3.71022300  |
| H | -4.66580700 | 2.87347700  | 1.64437300  |
| C | -3.10779700 | 2.16763900  | 5.12944300  |
| C | -1.69006000 | 0.39074500  | 4.14656400  |
| H | -0.51129400 | -1.08178000 | 3.18506500  |
| C | -4.05956600 | 3.15115000  | 4.98417500  |
| H | -5.37045000 | 4.17766500  | 3.59597400  |
| H | -2.66731500 | 1.96287800  | 6.10188800  |
| H | -1.25164400 | 0.20116000  | 5.12307100  |
| H | -4.38162900 | 3.73403900  | 5.84216000  |
| C | -1.68005200 | 2.88693400  | -0.23387900 |
| H | -1.87788700 | 3.54153100  | 0.62600700  |
| H | -0.94791900 | 2.15255100  | 0.11432500  |
| C | -1.05273100 | 3.70693800  | -1.34317600 |
| C | -1.38888600 | 5.05670500  | -1.51780100 |
| C | -0.11636400 | 3.13359100  | -2.21635800 |
| C | -0.81635800 | 5.81318600  | -2.54212100 |
| H | -2.10452400 | 5.51933500  | -0.84173400 |
| C | 0.45776300  | 3.88752200  | -3.24169000 |
| H | 0.18338500  | 2.09673700  | -2.08531800 |
| C | 0.10833600  | 5.22906700  | -3.40952900 |
| H | -1.08858100 | 6.85877700  | -2.65818100 |
| H | 1.18332200  | 3.42448200  | -3.90462900 |
| H | 0.55838200  | 5.81649600  | -4.20489800 |
| C | -2.14634000 | -1.45912800 | -0.96644000 |



|    |             |             |             |
|----|-------------|-------------|-------------|
| C  | -3.08033200 | -2.50680900 | -0.99023800 |
| C  | -2.02147500 | -0.64900700 | -2.10648500 |
| C  | -3.88055200 | -2.73304000 | -2.10980200 |
| H  | -3.18359300 | -3.16891500 | -0.13954500 |
| C  | -2.81850300 | -0.85732700 | -3.23060000 |
| H  | -1.28612000 | 0.14544800  | -2.12769900 |
| C  | -3.73954100 | -1.89828600 | -3.21110100 |
| H  | -4.60533500 | -3.53933900 | -2.13466400 |
| H  | -2.73453300 | -0.22561100 | -4.10789100 |
| C  | -0.95441600 | -2.81730200 | 1.29161600  |
| C  | -2.01790100 | -3.27352300 | 2.09198900  |
| C  | 0.15758900  | -3.65271400 | 1.10530300  |
| C  | -1.98277600 | -4.53436600 | 2.68383600  |
| H  | -2.87912300 | -2.63710400 | 2.26862400  |
| C  | 0.20394400  | -4.91775100 | 1.69348800  |
| H  | 0.99626500  | -3.31680700 | 0.50748600  |
| C  | -0.86706400 | -5.33829400 | 2.47043200  |
| H  | -2.79561500 | -4.89530900 | 3.30484600  |
| H  | 1.06123100  | -5.56839000 | 1.55953300  |
| P  | -0.99560200 | -1.16862300 | 0.45440200  |
| F  | -4.51046900 | -2.11010100 | -4.29743200 |
| F  | -0.82599800 | -6.55787200 | 3.04404800  |
| Pt | 1.27850400  | -0.44496100 | -0.13870800 |
| C  | 5.67924300  | 0.61836000  | 0.53910100  |
| C  | 5.48710700  | -0.22291900 | 1.64935500  |
| C  | 6.94773800  | 0.62051600  | -0.06967100 |
| C  | 6.52056700  | -1.02763400 | 2.13539600  |
| H  | 4.51540300  | -0.25362100 | 2.13496300  |
| C  | 7.98467200  | -0.18236400 | 0.41055700  |
| H  | 7.13409400  | 1.25745000  | -0.93108800 |
| C  | 7.77224200  | -1.00924500 | 1.51613900  |
| H  | 6.34843800  | -1.66741700 | 2.99702300  |
| H  | 8.95650600  | -0.16219000 | -0.07572200 |
| H  | 8.57785100  | -1.63356900 | 1.89328900  |
| C  | 4.36707900  | 1.98029300  | -1.94364600 |
| H  | 3.58494100  | 2.67831700  | -2.25808800 |
| H  | 5.33108200  | 2.38564100  | -2.26884500 |
| H  | 4.19662500  | 1.01878800  | -2.43554100 |

116

**TSCD-cis-r**

imaginary frequencies -206.328

E(B3LYP/LanL2DZ(Pd),6-31G(d,p))=-3463.039484

H(B3LYP/LanL2DZ(Pd),6-31G(d,p))=-3462.974883

G(B3LYP/LanL2DZ(Pd),6-31G(d,p))=-3463.147238

|    |             |             |             |
|----|-------------|-------------|-------------|
| B  | 0.98101500  | -1.75179900 | -1.87317500 |
| O  | 1.15641700  | -3.12881100 | -1.98928200 |
| C  | 1.20245800  | -3.47984100 | -3.38065500 |
| C  | 0.72981500  | -2.20984700 | -4.11653700 |
| B  | 3.04852200  | -1.25370600 | -0.28380800 |
| O  | 3.88597400  | -1.26189500 | -1.39335700 |
| C  | 4.87791500  | -2.28549500 | -1.21085400 |
| O  | 0.79466600  | -1.17354900 | -3.12636800 |
| O  | 3.42182700  | -2.20486700 | 0.65321300  |
| C  | 4.46777700  | -3.01079900 | 0.09246200  |
| C  | 2.79760900  | 0.55276000  | 0.51097900  |
| C  | 1.77943600  | 0.84116100  | 1.27510100  |
| H  | 0.55712000  | -4.34504700 | -3.56294600 |
| H  | 2.23094300  | -3.75364700 | -3.64815000 |
| H  | 1.36771500  | -1.94603700 | -4.96596600 |
| H  | -0.30436200 | -2.30110700 | -4.47246200 |
| H  | 4.07725600  | -4.01699000 | -0.09827000 |
| H  | 4.86766000  | -2.94861400 | -2.08182200 |
| H  | 5.29149600  | -3.08062900 | 0.80902000  |
| C  | 1.41405000  | 1.75951400  | 2.37763400  |
| H  | 1.36831600  | 1.19557200  | 3.31675800  |
| H  | 2.14877000  | 2.56425100  | 2.49140400  |
| H  | 0.41969300  | 2.18839500  | 2.22733700  |
| H  | 5.86310100  | -1.81608800 | -1.13438900 |
| Si | 4.28145400  | 1.53911600  | -0.09662000 |
| C  | 4.24968700  | 3.12423900  | 0.83425400  |
| C  | 4.28235700  | 4.19784300  | 1.40984800  |
| C  | 4.32008500  | 5.48576900  | 2.09351900  |
| H  | 3.36014700  | 6.00751500  | 2.00878900  |
| H  | 4.54324900  | 5.36282900  | 3.15936700  |
| H  | 5.09157100  | 6.13520100  | 1.66460200  |
| C  | -2.73273300 | 2.15182000  | -0.76737200 |
| C  | -3.39667700 | 1.33735600  | 0.14882800  |
| C  | -4.72579000 | 0.87124600  | -0.12681200 |
| C  | -5.35101500 | 1.21854200  | -1.36861100 |
| C  | -4.63868300 | 2.03191300  | -2.28445200 |
| C  | -3.37551500 | 2.48462900  | -1.98915600 |
| H  | -5.01556400 | -0.18239300 | 1.74539400  |
| C  | -5.46731100 | 0.07906300  | 0.79480400  |
| C  | -6.66544400 | 0.75396400  | -1.64431500 |
| H  | -5.11061800 | 2.30106700  | -3.22619900 |
| H  | -2.85020400 | 3.11388600  | -2.69864200 |
| C  | -7.35137400 | -0.01272200 | -0.73074400 |

|   |             |             |             |
|---|-------------|-------------|-------------|
| C | -6.74382600 | -0.34781900 | 0.50296800  |
| H | -7.12131800 | 1.02172900  | -2.59418500 |
| H | -8.35717800 | -0.35884100 | -0.95049700 |
| H | -7.29089900 | -0.94676600 | 1.22577900  |
| C | -2.78979600 | 1.04057700  | 1.49176300  |
| C | -3.14480200 | 1.93576000  | 2.57043100  |
| C | -1.92707400 | -0.02676100 | 1.74494000  |
| C | -4.01184100 | 3.04909300  | 2.37581200  |
| C | -2.62268300 | 1.72122800  | 3.88605700  |
| C | -1.39338800 | -0.19517200 | 3.06157800  |
| C | -4.34200100 | 3.88836400  | 3.41802100  |
| H | -4.41709300 | 3.23531200  | 1.38843600  |
| C | -2.98375900 | 2.59991700  | 4.94059200  |
| C | -1.73846400 | 0.63245700  | 4.09589500  |
| H | -0.69344500 | -1.00200800 | 3.24685400  |
| C | -3.82728900 | 3.66403100  | 4.71553600  |
| H | -5.00541000 | 4.72997300  | 3.24076400  |
| H | -2.57654700 | 2.41634800  | 5.93160700  |
| H | -1.32644300 | 0.46828400  | 5.08838900  |
| H | -4.09678800 | 4.33186200  | 5.52859800  |
| C | -1.34411100 | 2.70811100  | -0.44347100 |
| H | -1.43416900 | 3.35246900  | 0.44095500  |
| H | -0.69145200 | 1.88001600  | -0.14291700 |
| C | -0.66419700 | 3.48227100  | -1.55369300 |
| C | -0.81013300 | 4.87272600  | -1.65263000 |
| C | 0.11969900  | 2.82215500  | -2.51235600 |
| C | -0.19615300 | 5.58870000  | -2.68203500 |
| H | -1.41040900 | 5.39891500  | -0.91377800 |
| C | 0.73340400  | 3.53588700  | -3.54403200 |
| H | 0.26079900  | 1.74564100  | -2.44847200 |
| C | 0.57724700  | 4.92103600  | -3.63300800 |
| H | -0.31937000 | 6.66690800  | -2.73835000 |
| H | 1.33777100  | 3.00654000  | -4.27534500 |
| H | 1.05804500  | 5.47562100  | -4.43396500 |
| C | -2.38750000 | -1.52520900 | -0.86221200 |
| C | -3.46065800 | -2.41631600 | -0.70039400 |
| C | -2.19541900 | -0.92574500 | -2.11674600 |
| C | -4.32812900 | -2.69618000 | -1.75446400 |
| H | -3.62338600 | -2.91441600 | 0.24758300  |
| C | -3.05610300 | -1.19484500 | -3.17970400 |
| H | -1.35528500 | -0.26257700 | -2.27813100 |
| C | -4.11185900 | -2.07556700 | -2.97848400 |
| H | -5.16004100 | -3.38184600 | -1.63782800 |
| H | -2.91723400 | -0.73064000 | -4.14979300 |

|    |             |             |             |
|----|-------------|-------------|-------------|
| C  | -1.14471400 | -2.79910000 | 1.40605700  |
| C  | -2.15533700 | -3.16601700 | 2.31255400  |
| C  | -0.10214700 | -3.70563000 | 1.15362400  |
| C  | -2.13572500 | -4.40597200 | 2.94866500  |
| H  | -2.95890700 | -2.47405800 | 2.54340300  |
| C  | -0.07354000 | -4.95070900 | 1.78267800  |
| H  | 0.68890700  | -3.43698500 | 0.46285700  |
| C  | -1.09099400 | -5.28066000 | 2.66867000  |
| H  | -2.90721400 | -4.69667300 | 3.65354000  |
| H  | 0.72774500  | -5.65750600 | 1.59648700  |
| P  | -1.17445300 | -1.19109600 | 0.49130700  |
| F  | -4.94492200 | -2.34458700 | -4.00437300 |
| F  | -1.06518900 | -6.48069400 | 3.28251800  |
| Pt | 1.01739800  | -0.61162200 | -0.11865500 |
| C  | 5.89635600  | 0.66912600  | 0.35229100  |
| C  | 6.01396800  | -0.06194400 | 1.54877200  |
| C  | 7.03224800  | 0.76509500  | -0.47108500 |
| C  | 7.21740000  | -0.67170200 | 1.90880900  |
| H  | 5.15095100  | -0.16685700 | 2.20102000  |
| C  | 8.23862400  | 0.15609600  | -0.11693400 |
| H  | 6.97883600  | 1.31875000  | -1.40512300 |
| C  | 8.33317600  | -0.56431500 | 1.07529300  |
| H  | 7.28446700  | -1.23038800 | 2.83869200  |
| H  | 9.10252100  | 0.24349000  | -0.77059800 |
| H  | 9.27044900  | -1.03872600 | 1.35337700  |
| C  | 4.15584400  | 1.92293600  | -1.93073600 |
| H  | 3.23092100  | 2.47266700  | -2.12817200 |
| H  | 4.99416800  | 2.54779200  | -2.25733400 |
| H  | 4.14456100  | 0.99902600  | -2.51319900 |

116

**D-cis-r**

imaginary frequencies no

E(B3LYP/LanL2DZ(Pd),6-31G(d,p))=-3463.052216

H(B3LYP/LanL2DZ(Pd),6-31G(d,p))=-3462.987267

G(B3LYP/LanL2DZ(Pd),6-31G(d,p))=-3463.161701

|   |             |            |             |
|---|-------------|------------|-------------|
| B | -0.97226000 | 1.15435300 | -2.20223900 |
| O | -1.08678100 | 2.44631000 | -2.71041300 |
| C | -1.28716300 | 2.37830300 | -4.13285700 |
| C | -0.97946200 | 0.91194500 | -4.49621200 |
| B | -3.42175100 | 1.55661600 | 0.32745900  |
| O | -4.22666600 | 2.05695800 | -0.68385800 |
| C | -4.60894900 | 3.39052700 | -0.32446500 |
| O | -0.97118700 | 0.21919800 | -3.23691900 |

|    |             |             |             |
|----|-------------|-------------|-------------|
| O  | -3.15749400 | 2.50453500  | 1.30393600  |
| C  | -3.65934600 | 3.76237400  | 0.83455200  |
| C  | -3.09897800 | 0.02718000  | 0.48281400  |
| C  | -2.02217900 | -0.36909900 | 1.26710800  |
| H  | -0.62104500 | 3.09013400  | -4.63064100 |
| H  | -2.32366500 | 2.65394100  | -4.36127300 |
| H  | -1.73365200 | 0.46780900  | -5.15311200 |
| H  | 0.00384800  | 0.80222800  | -4.97078000 |
| H  | -2.81758400 | 4.37938900  | 0.49751800  |
| H  | -4.50100300 | 4.04837300  | -1.19173000 |
| H  | -4.16624100 | 4.28130600  | 1.65387700  |
| C  | -1.92363100 | -1.48073600 | 2.24343100  |
| H  | -2.17885500 | -1.04947000 | 3.22352200  |
| H  | -2.63006100 | -2.29690800 | 2.05268500  |
| H  | -0.90600600 | -1.86935800 | 2.32723200  |
| H  | -5.66099800 | 3.38718400  | -0.01353700 |
| Si | -4.40644900 | -1.10522000 | -0.32140700 |
| C  | -3.99289500 | -2.87458300 | -0.05823600 |
| C  | -3.74652700 | -4.06281800 | 0.05482600  |
| C  | -3.43531300 | -5.48098400 | 0.19036000  |
| H  | -2.54701000 | -5.74143200 | -0.39554400 |
| H  | -3.23979200 | -5.74465000 | 1.23610200  |
| H  | -4.26791300 | -6.10218100 | -0.15929300 |
| C  | 2.77790500  | -2.29632900 | -0.17797900 |
| C  | 3.38658300  | -1.27823600 | 0.55509100  |
| C  | 4.72441800  | -0.86393600 | 0.24692200  |
| C  | 5.41832000  | -1.47817800 | -0.84629100 |
| C  | 4.76389800  | -2.49880400 | -1.57915300 |
| C  | 3.48938600  | -2.89414100 | -1.25147100 |
| H  | 4.90039100  | 0.60545900  | 1.83089000  |
| C  | 5.40542500  | 0.14083400  | 0.99087900  |
| C  | 6.73849000  | -1.05687300 | -1.16098100 |
| H  | 5.28753200  | -2.97033200 | -2.40708400 |
| H  | 3.00855500  | -3.68115200 | -1.82128900 |
| C  | 7.36356100  | -0.07716500 | -0.42439800 |
| C  | 6.68823900  | 0.52240500  | 0.66571600  |
| H  | 7.24791800  | -1.52801600 | -1.99782000 |
| H  | 8.37386700  | 0.23481500  | -0.67282500 |
| H  | 7.18814800  | 1.28916500  | 1.25106600  |
| C  | 2.69578100  | -0.68829800 | 1.75216400  |
| C  | 2.96595900  | -1.31669300 | 3.02696400  |
| C  | 1.81034100  | 0.38708700  | 1.69747100  |
| C  | 3.85938500  | -2.41821900 | 3.15275800  |
| C  | 2.32684700  | -0.83770100 | 4.21480100  |

|   |             |             |             |
|---|-------------|-------------|-------------|
| C | 1.15402500  | 0.81930300  | 2.89384900  |
| C | 4.10767100  | -3.00088600 | 4.37731200  |
| H | 4.35261000  | -2.80062500 | 2.26708700  |
| C | 2.60335900  | -1.45614800 | 5.46135300  |
| C | 1.41167700  | 0.24233400  | 4.10707700  |
| H | 0.42186700  | 1.61712600  | 2.83305600  |
| C | 3.47735200  | -2.51685800 | 5.54590400  |
| H | 4.79551900  | -3.83884600 | 4.44431600  |
| H | 2.10750100  | -1.07592200 | 6.35081300  |
| H | 0.90594600  | 0.59906400  | 5.00065300  |
| H | 3.68185400  | -2.98339700 | 6.50518300  |
| C | 1.37095600  | -2.77653800 | 0.18754300  |
| H | 1.40201400  | -3.16952500 | 1.21241900  |
| H | 0.69943600  | -1.91061500 | 0.22342000  |
| C | 0.76498100  | -3.82227200 | -0.72587600 |
| C | 1.02677600  | -5.18598400 | -0.52837500 |
| C | -0.07110700 | -3.44878700 | -1.78822000 |
| C | 0.47927900  | -6.15252200 | -1.37361200 |
| H | 1.66740900  | -5.49147900 | 0.29581900  |
| C | -0.62246100 | -4.41356600 | -2.63423700 |
| H | -0.30554000 | -2.39932900 | -1.95087400 |
| C | -0.34712100 | -5.76793200 | -2.43267800 |
| H | 0.69597800  | -7.20392600 | -1.20449200 |
| H | -1.27264200 | -4.10397500 | -3.44743000 |
| H | -0.77408400 | -6.51775300 | -3.09300900 |
| C | 2.39492700  | 1.18080100  | -1.19373300 |
| C | 3.50893900  | 2.03512100  | -1.22823300 |
| C | 2.17573900  | 0.31168600  | -2.27300000 |
| C | 4.39083300  | 2.01874500  | -2.30692200 |
| H | 3.69313000  | 2.72884700  | -0.41603900 |
| C | 3.05027700  | 0.28391900  | -3.35768500 |
| H | 1.30544400  | -0.33309500 | -2.27922900 |
| C | 4.14564300  | 1.13935600  | -3.35453000 |
| H | 5.25587500  | 2.67145600  | -2.34306200 |
| H | 2.89336100  | -0.38847800 | -4.19386600 |
| C | 1.23327700  | 3.04785800  | 0.64067100  |
| C | 2.11441400  | 3.55629400  | 1.60801800  |
| C | 0.40855300  | 3.94284200  | -0.06339100 |
| C | 2.16875000  | 4.92359900  | 1.88176300  |
| H | 2.76022500  | 2.88612800  | 2.16513900  |
| C | 0.45958200  | 5.31145200  | 0.19746600  |
| H | -0.26386300 | 3.56892900  | -0.82893400 |
| C | 1.33632800  | 5.77904400  | 1.17031800  |
| H | 2.84043500  | 5.32679200  | 2.63195200  |

|    |             |             |             |
|----|-------------|-------------|-------------|
| H  | -0.16740500 | 6.01359800  | -0.34171000 |
| P  | 1.16573900  | 1.25869200  | 0.17940100  |
| F  | 4.99225400  | 1.12121000  | -4.40401000 |
| F  | 1.38231200  | 7.10098800  | 1.43022700  |
| Pt | -0.98834200 | 0.61550800  | -0.18243000 |
| C  | -6.09078200 | -0.76129900 | 0.47276400  |
| C  | -6.19455700 | -0.20677400 | 1.76107600  |
| C  | -7.28667000 | -1.06586500 | -0.20288800 |
| C  | -7.43705300 | 0.03100500  | 2.35285700  |
| H  | -5.29179000 | 0.05008400  | 2.31043900  |
| C  | -8.53196400 | -0.83110900 | 0.38217800  |
| H  | -7.24986900 | -1.49218400 | -1.20263300 |
| C  | -8.60971300 | -0.28146000 | 1.66357700  |
| H  | -7.48919800 | 0.46065400  | 3.34992200  |
| H  | -9.44103800 | -1.07451500 | -0.16165200 |
| H  | -9.57822700 | -0.09691800 | 2.12066300  |
| C  | -4.45946000 | -0.79752600 | -2.17917200 |
| H  | -3.45310200 | -0.89275200 | -2.59904700 |
| H  | -5.11231900 | -1.52079900 | -2.67905600 |
| H  | -4.82038900 | 0.21344100  | -2.38351200 |

116

**F-cis-s**

imaginary frequencies no

E(B3LYP/LanL2DZ(Pd),6-31G(d,p))=-3463.092839

H(B3LYP/LanL2DZ(Pd),6-31G(d,p))=-3463.028535

G(B3LYP/LanL2DZ(Pd),6-31G(d,p))=-3463.201961

|   |             |             |             |
|---|-------------|-------------|-------------|
| B | -0.91566100 | 2.16800200  | -1.57506200 |
| O | -1.06104000 | 3.54481700  | -1.45828500 |
| C | -0.97529800 | 4.13334600  | -2.76567000 |
| C | -1.00814000 | 2.93211300  | -3.73792900 |
| B | -2.63255900 | -0.90034400 | 1.74657800  |
| O | -3.05446200 | -1.59073100 | 2.85975000  |
| C | -1.91836100 | -1.88172400 | 3.68127800  |
| O | -0.83117100 | 1.77968800  | -2.90306000 |
| O | -1.26123300 | -0.60482800 | 1.83315200  |
| C | -0.80317200 | -0.96070000 | 3.15097300  |
| C | -5.70120700 | -2.37048400 | 1.60427600  |
| H | -5.66826100 | -1.96282500 | 2.61785800  |
| H | -6.71648500 | -2.72927100 | 1.40457700  |
| H | -5.02017200 | -3.22572000 | 1.56852600  |
| C | -3.46584400 | -0.43039600 | 0.55050700  |
| C | -2.85700700 | 0.44714500  | -0.31886400 |
| C | -6.50166500 | 0.34528100  | 0.41519800  |

|    |             |             |             |
|----|-------------|-------------|-------------|
| C  | -7.72019200 | 0.28933800  | -0.28517100 |
| C  | -6.27428000 | 1.46094000  | 1.24119100  |
| C  | -8.67478200 | 1.30089100  | -0.16230500 |
| H  | -7.91899600 | -0.55112400 | -0.94595200 |
| C  | -7.22527300 | 2.47518500  | 1.36990900  |
| H  | -5.33466500 | 1.54409500  | 1.78262000  |
| C  | -8.42960800 | 2.39647500  | 0.66786600  |
| H  | -9.60763000 | 1.23659400  | -0.71681200 |
| H  | -7.02482300 | 3.32826600  | 2.01313900  |
| H  | -9.17037700 | 3.18604000  | 0.76348800  |
| H  | -0.04243900 | 4.70471800  | -2.83996100 |
| H  | -1.81445000 | 4.82082500  | -2.90965700 |
| H  | -1.96741000 | 2.84833300  | -4.26280000 |
| H  | -0.20710000 | 2.96698800  | -4.48304700 |
| H  | -0.69619400 | -0.04882500 | 3.74877800  |
| H  | -2.16411700 | -1.68760400 | 4.72953700  |
| H  | 0.16823500  | -1.45155900 | 3.08282300  |
| C  | -3.60140000 | 1.03214200  | -1.49466800 |
| H  | -3.58771300 | 2.12736200  | -1.43123100 |
| H  | -3.09412300 | 0.76609700  | -2.42796700 |
| H  | -4.64477200 | 0.71522800  | -1.56628200 |
| H  | -1.66087000 | -2.94229600 | 3.57337500  |
| Si | -5.23436300 | -1.06418800 | 0.32007100  |
| C  | -5.42587800 | -1.87633100 | -1.32675700 |
| C  | -5.56047500 | -2.42575800 | -2.40641200 |
| C  | -5.72052000 | -3.07239100 | -3.70515700 |
| H  | -6.19332200 | -2.39699500 | -4.42747500 |
| H  | -4.75187900 | -3.37487600 | -4.11939900 |
| H  | -6.34582500 | -3.96951100 | -3.62993900 |
| C  | 2.08919000  | -2.26253300 | -0.83419500 |
| C  | 3.10783000  | -1.54450000 | -0.21071600 |
| C  | 4.37859600  | -1.37678300 | -0.86141600 |
| C  | 4.57365400  | -1.91743300 | -2.17375100 |
| C  | 3.49904500  | -2.60407000 | -2.79564000 |
| C  | 2.30168100  | -2.77036300 | -2.14547400 |
| H  | 5.34583800  | -0.29129100 | 0.74692400  |
| C  | 5.47257900  | -0.70455600 | -0.24778000 |
| C  | 5.83231600  | -1.76304200 | -2.81374900 |
| H  | 3.64189500  | -3.00888400 | -3.79448800 |
| H  | 1.49605500  | -3.31639500 | -2.62539500 |
| C  | 6.86983200  | -1.10987000 | -2.18830200 |
| C  | 6.68453800  | -0.57813500 | -0.89069900 |
| H  | 5.96144800  | -2.17589200 | -3.81109800 |
| H  | 7.82873900  | -1.00114400 | -2.68659300 |



|   |             |             |             |
|---|-------------|-------------|-------------|
| H | 7.50553800  | -0.06488100 | -0.39788600 |
| C | 2.94531400  | -1.04524200 | 1.19902600  |
| C | 3.44426700  | -1.90766400 | 2.24608000  |
| C | 2.34726600  | 0.17202000  | 1.53967100  |
| C | 4.05219500  | -3.16580500 | 1.96477200  |
| C | 3.33358100  | -1.51576500 | 3.61926000  |
| C | 2.22373600  | 0.52032000  | 2.92118300  |
| C | 4.52113100  | -3.97457300 | 2.97647900  |
| H | 4.14623700  | -3.48713500 | 0.93474400  |
| C | 3.83038900  | -2.36883700 | 4.64046000  |
| C | 2.70900000  | -0.28080100 | 3.92194000  |
| H | 1.73466400  | 1.44885900  | 3.19017400  |
| C | 4.41336500  | -3.57533300 | 4.32928600  |
| H | 4.97966200  | -4.92847900 | 2.73277400  |
| H | 3.73706500  | -2.04913400 | 5.67518000  |
| H | 2.60847600  | 0.02232200  | 4.96113100  |
| H | 4.78879000  | -4.22239200 | 5.11661100  |
| C | 0.74139700  | -2.47133700 | -0.15957100 |
| H | 0.88827900  | -2.45845300 | 0.92547900  |
| H | 0.10836500  | -1.59885500 | -0.37315300 |
| C | -0.02545700 | -3.72561900 | -0.53329100 |
| C | 0.53380400  | -5.00126800 | -0.36174300 |
| C | -1.34139600 | -3.63071400 | -1.00519400 |
| C | -0.20191300 | -6.14878900 | -0.65650900 |
| H | 1.55257900  | -5.09300800 | 0.00717300  |
| C | -2.08369400 | -4.77886800 | -1.29370100 |
| H | -1.79523300 | -2.65136000 | -1.13194400 |
| C | -1.51520100 | -6.04129400 | -1.12292100 |
| H | 0.24763000  | -7.12845000 | -0.51747800 |
| H | -3.10694400 | -4.67695600 | -1.64421800 |
| H | -2.08952100 | -6.93594300 | -1.34702300 |
| C | 2.51090400  | 1.48857600  | -1.18682800 |
| C | 3.69108000  | 2.24432800  | -1.28077600 |
| C | 2.03164400  | 0.84689500  | -2.34022900 |
| C | 4.38151500  | 2.35198500  | -2.48610400 |
| H | 4.07681000  | 2.77211600  | -0.41731200 |
| C | 2.71163600  | 0.94536100  | -3.55257300 |
| H | 1.11227800  | 0.27746200  | -2.29783600 |
| C | 3.87931100  | 1.69572800  | -3.60400700 |
| H | 5.29337400  | 2.93327900  | -2.56806300 |
| H | 2.34628200  | 0.45058500  | -4.44544700 |
| C | 1.82971500  | 2.99989600  | 1.18305400  |
| C | 3.04899900  | 3.31793200  | 1.81102700  |
| C | 0.81860300  | 3.97378600  | 1.15141000  |

|    |             |            |             |
|----|-------------|------------|-------------|
| C  | 3.26041400  | 4.56993100 | 2.38382300  |
| H  | 3.83837600  | 2.57601600 | 1.87826200  |
| C  | 1.01838100  | 5.23329100 | 1.72004400  |
| H  | -0.12578300 | 3.75589300 | 0.66590200  |
| C  | 2.23625300  | 5.51070100 | 2.32603400  |
| H  | 4.19493300  | 4.82155400 | 2.87365900  |
| H  | 0.24234400  | 5.99077000 | 1.69908000  |
| P  | 1.51143300  | 1.36842900 | 0.36479000  |
| F  | 4.54020500  | 1.80150300 | -4.77429300 |
| F  | 2.43482200  | 6.72194600 | 2.88160000  |
| Pt | -0.86680200 | 0.92322300 | -0.01669100 |

116

**F-cis-r**

imaginary frequencies no

E(B3LYP/LanL2DZ(Pd),6-31G(d,p))=-3463.087749

H(B3LYP/LanL2DZ(Pd),6-31G(d,p))=-3463.022553

G(B3LYP/LanL2DZ(Pd),6-31G(d,p))=-3463.200562

|    |             |             |             |
|----|-------------|-------------|-------------|
| B  | 0.51511600  | -0.68398300 | -2.77906500 |
| O  | 0.62641300  | -1.97481500 | -3.27113500 |
| C  | 0.45703200  | -1.92654000 | -4.69840900 |
| C  | -0.10268900 | -0.51439700 | -4.97329100 |
| B  | 3.62659400  | -1.11847200 | 0.01881200  |
| O  | 4.34300200  | -2.19412800 | -0.46991300 |
| C  | 4.28333500  | -3.25406100 | 0.49214700  |
| O  | 0.15340500  | 0.22068200  | -3.76371700 |
| O  | 2.96966100  | -1.42482300 | 1.20222400  |
| C  | 3.17505800  | -2.82064600 | 1.47743300  |
| C  | 3.64544200  | 0.28026700  | -0.66618300 |
| C  | 2.51769700  | 0.75636700  | -1.26725000 |
| H  | -0.22340900 | -2.72375700 | -5.01198900 |
| H  | 1.43019900  | -2.08815100 | -5.17622600 |
| H  | 0.38804300  | -0.01528500 | -5.81390600 |
| H  | -1.18378500 | -0.52811900 | -5.15688200 |
| H  | 2.23622300  | -3.35860400 | 1.30331700  |
| H  | 4.05568100  | -4.19719700 | -0.01400300 |
| H  | 3.46436800  | -2.94489700 | 2.52551500  |
| C  | 2.45350500  | 2.02951500  | -2.07656100 |
| H  | 1.68647000  | 2.70330100  | -1.67758000 |
| H  | 3.40080300  | 2.57811400  | -2.10057300 |
| H  | 2.15077700  | 1.80163200  | -3.10462200 |
| H  | 5.26097100  | -3.34208000 | 0.98078200  |
| Si | 5.32236300  | 1.16854000  | -0.64876100 |
| C  | 5.14347900  | 2.92240400  | -0.12191500 |

|   |             |             |             |
|---|-------------|-------------|-------------|
| C | 5.02236900  | 4.08268000  | 0.22969000  |
| C | 4.86937900  | 5.47333800  | 0.64289500  |
| H | 4.26865100  | 6.03587800  | -0.08091400 |
| H | 4.36864800  | 5.54413500  | 1.61522400  |
| H | 5.84142400  | 5.97219700  | 0.73023600  |
| C | -3.15437200 | 2.06674800  | 0.25519100  |
| C | -3.44291500 | 0.98627800  | 1.08878200  |
| C | -4.75932100 | 0.42029700  | 1.11432200  |
| C | -5.76813600 | 0.94527700  | 0.24216700  |
| C | -5.43582500 | 2.03055900  | -0.60607800 |
| C | -4.17366200 | 2.57369800  | -0.59362200 |
| H | -4.36728400 | -1.04836500 | 2.65923900  |
| C | -5.11505500 | -0.65184500 | 1.98060100  |
| C | -7.06880500 | 0.37302600  | 0.25542100  |
| H | -6.19908700 | 2.43436400  | -1.26665200 |
| H | -3.94212200 | 3.41133500  | -1.24213100 |
| C | -7.37567800 | -0.66856800 | 1.10063300  |
| C | -6.38703700 | -1.18044800 | 1.97513800  |
| H | -7.82106000 | 0.77864800  | -0.41644800 |
| H | -8.37418500 | -1.09601900 | 1.10362100  |
| H | -6.63611400 | -1.99547400 | 2.64905100  |
| C | -2.39438000 | 0.46899800  | 2.03144300  |
| C | -2.34831700 | 1.05493500  | 3.35011900  |
| C | -1.44846100 | -0.49285700 | 1.67983400  |
| C | -3.30159700 | 2.02167900  | 3.78076200  |
| C | -1.31799900 | 0.67523900  | 4.26973300  |
| C | -0.40318500 | -0.82296800 | 2.60113000  |
| C | -3.24090900 | 2.56888200  | 5.04389200  |
| H | -4.08795400 | 2.32503200  | 3.09986900  |
| C | -1.28136000 | 1.25765600  | 5.56390300  |
| C | -0.34186800 | -0.26373600 | 3.84998000  |
| H | 0.37468200  | -1.51493500 | 2.29652600  |
| C | -2.22293200 | 2.18504900  | 5.94764300  |
| H | -3.98228000 | 3.30181000  | 5.34876200  |
| H | -0.48986200 | 0.95789300  | 6.24580200  |
| H | 0.46531400  | -0.52872300 | 4.52749200  |
| H | -2.18577200 | 2.62513200  | 6.93989000  |
| C | -1.75516400 | 2.68503300  | 0.24351200  |
| H | -1.43328200 | 2.83227600  | 1.28077600  |
| H | -1.04964100 | 1.95599500  | -0.18104300 |
| C | -1.61256300 | 3.99151200  | -0.50895900 |
| C | -1.95983500 | 5.20871700  | 0.09477400  |
| C | -1.12658000 | 4.01322600  | -1.82381300 |
| C | -1.82784500 | 6.41431200  | -0.59476700 |

|    |             |             |             |
|----|-------------|-------------|-------------|
| H  | -2.33314100 | 5.20894100  | 1.11628000  |
| C  | -0.99216100 | 5.21889000  | -2.51664900 |
| H  | -0.84157300 | 3.08043000  | -2.30456700 |
| C  | -1.34326800 | 6.42304200  | -1.90484300 |
| H  | -2.09835700 | 7.34734400  | -0.10784600 |
| H  | -0.60747000 | 5.21526400  | -3.53275800 |
| H  | -1.23609100 | 7.36141300  | -2.44165400 |
| C  | -2.71448100 | -1.33566400 | -1.00258600 |
| C  | -3.72503700 | -2.29069600 | -0.80303600 |
| C  | -2.82312900 | -0.45276200 | -2.08883100 |
| C  | -4.82572700 | -2.35631600 | -1.65380700 |
| H  | -3.65521600 | -2.99808300 | 0.01539800  |
| C  | -3.92005300 | -0.50682800 | -2.94785300 |
| H  | -2.03851500 | 0.27275100  | -2.27442800 |
| C  | -4.90464300 | -1.45881700 | -2.71294200 |
| H  | -5.61493900 | -3.08518300 | -1.50685500 |
| H  | -4.01835400 | 0.17427500  | -3.78605500 |
| C  | -0.94801500 | -3.07543800 | 0.43355700  |
| C  | -1.50313200 | -3.69146200 | 1.56648800  |
| C  | -0.20106500 | -3.85519000 | -0.46769200 |
| C  | -1.32158100 | -5.05435000 | 1.80288700  |
| H  | -2.07258800 | -3.10526000 | 2.28040300  |
| C  | -0.01924100 | -5.22032600 | -0.24505000 |
| H  | 0.23631100  | -3.39491500 | -1.34952300 |
| C  | -0.58166700 | -5.79639000 | 0.88898200  |
| H  | -1.74052600 | -5.54159200 | 2.67679300  |
| H  | 0.55207300  | -5.83498400 | -0.93249100 |
| P  | -1.18526500 | -1.29136100 | 0.02189000  |
| F  | -5.96490900 | -1.52086700 | -3.54297600 |
| F  | -0.40137900 | -7.11324600 | 1.11234500  |
| Pt | 0.78139100  | -0.23568800 | -0.86697300 |
| C  | 6.46752000  | 0.34659500  | 0.62354800  |
| C  | 6.66122400  | 0.90427900  | 1.90021400  |
| C  | 7.15949700  | -0.84276700 | 0.32277800  |
| C  | 7.50065800  | 0.30081800  | 2.83929300  |
| H  | 6.15497400  | 1.83090000  | 2.15722300  |
| C  | 8.00239900  | -1.44973300 | 1.25620100  |
| H  | 7.03324100  | -1.31081400 | -0.64954700 |
| C  | 8.17412100  | -0.87887000 | 2.51939400  |
| H  | 7.63251100  | 0.75445800  | 3.81834200  |
| H  | 8.53010200  | -2.36380900 | 0.99547900  |
| H  | 8.83177700  | -1.34825200 | 3.24640600  |
| C  | 6.16302100  | 1.12147600  | -2.34434000 |
| H  | 5.55275700  | 1.63119600  | -3.09613300 |

|   |            |            |             |
|---|------------|------------|-------------|
| H | 7.14423000 | 1.60638600 | -2.31137100 |
| H | 6.30166300 | 0.08719700 | -2.67676500 |

116

**F-trans-s**

imaginary frequencies no

E(B3LYP/LanL2DZ(Pd),6-31G(d,p))=-3463.084449

H(B3LYP/LanL2DZ(Pd),6-31G(d,p))=-3463.019562

G(B3LYP/LanL2DZ(Pd),6-31G(d,p))=-3463.195128

|    |             |             |             |
|----|-------------|-------------|-------------|
| B  | 1.25158700  | -0.62741600 | -2.62508800 |
| O  | 1.46975400  | -1.94780100 | -2.98174700 |
| C  | 1.48781600  | -2.02637000 | -4.41701000 |
| C  | 0.92180200  | -0.66979400 | -4.88724600 |
| B  | 4.85688800  | 2.52390900  | -0.46362900 |
| O  | 5.34034500  | 2.99418200  | 0.74809100  |
| C  | 6.27967800  | 4.04553200  | 0.49123200  |
| O  | 0.98603200  | 0.17089700  | -3.72430900 |
| O  | 5.34715100  | 3.25188700  | -1.52968000 |
| C  | 6.13274100  | 4.33822200  | -1.02131100 |
| C  | 3.90725900  | 1.28906600  | -0.53626600 |
| C  | 2.67766700  | 1.36969900  | -1.12761100 |
| H  | 0.88181400  | -2.87739200 | -4.74231200 |
| H  | 2.52043300  | -2.18180200 | -4.75116400 |
| H  | 1.50491200  | -0.21950300 | -5.69580700 |
| H  | -0.12316300 | -0.74923100 | -5.21042600 |
| H  | 5.60667000  | 5.28113400  | -1.21295600 |
| H  | 6.04015900  | 4.91084600  | 1.11730900  |
| H  | 7.09396500  | 4.36766600  | -1.54406600 |
| C  | 2.22549000  | 2.59956500  | -1.89269900 |
| H  | 1.36564200  | 3.06822000  | -1.39742400 |
| H  | 3.01484100  | 3.34900900  | -2.00579700 |
| H  | 1.88174400  | 2.30354500  | -2.88871900 |
| H  | 7.28666300  | 3.69827200  | 0.75222300  |
| Si | 4.57464500  | -0.25249200 | 0.32680700  |
| C  | 4.33316800  | -1.77983500 | -0.66679700 |
| C  | 4.29529900  | -2.80125500 | -1.32972400 |
| C  | 4.21567500  | -4.01076100 | -2.14025100 |
| H  | 3.24518100  | -4.06897500 | -2.64540400 |
| H  | 4.99789000  | -4.02656000 | -2.90822900 |
| H  | 4.33942000  | -4.91258300 | -1.52885400 |
| C  | -3.18884600 | 1.74399700  | -0.33566300 |
| C  | -3.40704300 | 0.68271600  | 0.53952400  |
| C  | -4.60284900 | -0.10422900 | 0.43742700  |
| C  | -5.54811600 | 0.18146800  | -0.60057700 |

|   |             |             |             |
|---|-------------|-------------|-------------|
| C | -5.28256700 | 1.25593900  | -1.48796500 |
| C | -4.14503100 | 2.01211100  | -1.35298900 |
| H | -4.19939200 | -1.38065400 | 2.13996400  |
| C | -4.89789900 | -1.16500200 | 1.33849300  |
| C | -6.72504400 | -0.60663200 | -0.70814000 |
| H | -6.00018700 | 1.47814800  | -2.27382600 |
| H | -3.96509900 | 2.84396900  | -2.02640000 |
| C | -6.97502700 | -1.63108000 | 0.17675300  |
| C | -6.05219100 | -1.90687600 | 1.21332900  |
| H | -7.42942600 | -0.38139300 | -1.50499300 |
| H | -7.87982000 | -2.22505400 | 0.08557100  |
| H | -6.25782800 | -2.70915200 | 1.91651100  |
| C | -2.44333000 | 0.42012600  | 1.66137100  |
| C | -2.69478400 | 1.10306800  | 2.90845000  |
| C | -1.31696900 | -0.39352000 | 1.54429700  |
| C | -3.84240800 | 1.92497900  | 3.10278200  |
| C | -1.77200700 | 0.97488800  | 3.99586700  |
| C | -0.39684700 | -0.48429700 | 2.63710700  |
| C | -4.05967400 | 2.57483700  | 4.29847700  |
| H | -4.55650500 | 2.03284400  | 2.29517300  |
| C | -2.02280500 | 1.65860600  | 5.21495300  |
| C | -0.61545300 | 0.17470100  | 3.81811200  |
| H | 0.50115900  | -1.08512400 | 2.53444200  |
| C | -3.14266200 | 2.44351200  | 5.36743300  |
| H | -4.94490800 | 3.19204300  | 4.42203000  |
| H | -1.30793900 | 1.55035400  | 6.02645800  |
| H | 0.10880600  | 0.09181300  | 4.62298000  |
| H | -3.32483900 | 2.96283500  | 6.30378800  |
| C | -1.92883300 | 2.60145100  | -0.25327500 |
| H | -1.52609900 | 2.54653800  | 0.76208600  |
| H | -1.15712700 | 2.15523800  | -0.89619300 |
| C | -2.11664800 | 4.05786300  | -0.63275600 |
| C | -2.80642700 | 4.93105000  | 0.22212400  |
| C | -1.60248600 | 4.56635300  | -1.83214300 |
| C | -2.97852300 | 6.27287500  | -0.11448800 |
| H | -3.20461100 | 4.55271200  | 1.16064500  |
| C | -1.77311300 | 5.91103200  | -2.17283200 |
| H | -1.05721200 | 3.90512900  | -2.50124600 |
| C | -2.46286400 | 6.76801000  | -1.31549000 |
| H | -3.51198800 | 6.93496900  | 0.56217200  |
| H | -1.36320100 | 6.28647500  | -3.10642100 |
| H | -2.59494200 | 7.81409800  | -1.57698900 |
| C | -2.01354000 | -1.64450200 | -1.18216100 |
| C | -2.86400900 | -2.75444000 | -1.05167700 |

|    |             |             |             |
|----|-------------|-------------|-------------|
| C  | -2.11895300 | -0.84590100 | -2.33234700 |
| C  | -3.80604200 | -3.05539400 | -2.03300800 |
| H  | -2.78913700 | -3.40040400 | -0.18466400 |
| C  | -3.05785600 | -1.13409400 | -3.32162700 |
| H  | -1.45522900 | 0.00199500  | -2.46287900 |
| C  | -3.88792300 | -2.23590900 | -3.15266800 |
| H  | -4.47036200 | -3.90733100 | -1.94008500 |
| H  | -3.15308100 | -0.51935500 | -4.21001700 |
| C  | -0.26413700 | -2.95451200 | 0.68339000  |
| C  | -0.94374300 | -3.55964700 | 1.75317600  |
| C  | 0.76463800  | -3.66464600 | 0.04247700  |
| C  | -0.61237100 | -4.84640800 | 2.17649900  |
| H  | -1.72966900 | -3.02182300 | 2.27369800  |
| C  | 1.10051300  | -4.95467900 | 0.45294900  |
| H  | 1.30730100  | -3.20492700 | -0.77729600 |
| C  | 0.40636600  | -5.52335000 | 1.51449100  |
| H  | -1.12546400 | -5.32356200 | 3.00457400  |
| H  | 1.89366700  | -5.51475400 | -0.03031000 |
| P  | -0.67945600 | -1.27779300 | 0.03553800  |
| F  | -4.79424100 | -2.52390200 | -4.10832800 |
| F  | 0.73252800  | -6.76698100 | 1.91969900  |
| Pt | 1.19386800  | 0.02236900  | -0.74843900 |
| C  | 3.83759700  | -0.53401000 | 2.05322400  |
| C  | 3.42902100  | -1.80496000 | 2.49644000  |
| C  | 3.77462300  | 0.53242400  | 2.97164700  |
| C  | 2.98367800  | -2.00850200 | 3.80575600  |
| H  | 3.46451700  | -2.64638500 | 1.80957800  |
| C  | 3.33436100  | 0.33373500  | 4.28165400  |
| H  | 4.08477900  | 1.52799600  | 2.66179400  |
| C  | 2.94040800  | -0.93912100 | 4.70367100  |
| H  | 2.67785500  | -3.00144000 | 4.12562100  |
| H  | 3.30372600  | 1.17053400  | 4.97501100  |
| H  | 2.60871800  | -1.09798300 | 5.72682900  |
| C  | 6.45154800  | -0.07687600 | 0.54419400  |
| H  | 6.94465100  | 0.10023500  | -0.41837500 |
| H  | 6.69264100  | 0.75461500  | 1.21263800  |
| H  | 6.87003500  | -0.99401500 | 0.97059200  |

116

**F-trans-r**

imaginary frequencies no

E(B3LYP/LanL2DZ(Pd),6-31G(d,p))=-3463.082029

H(B3LYP/LanL2DZ(Pd),6-31G(d,p))=-3463.01707

G(B3LYP/LanL2DZ(Pd),6-31G(d,p))=-3463.192686

|    |             |             |             |
|----|-------------|-------------|-------------|
| B  | 1.02508900  | -1.15743400 | -2.26115300 |
| O  | 1.31136200  | -2.50981200 | -2.32550700 |
| C  | 1.39920400  | -2.88023600 | -3.71234500 |
| C  | 0.80082800  | -1.67857400 | -4.47418700 |
| B  | 4.70925200  | 2.13153500  | -0.82551300 |
| O  | 4.91704200  | 3.21407200  | 0.00670100  |
| C  | 6.08316200  | 3.91257900  | -0.45033400 |
| O  | 0.77783100  | -0.61455500 | -3.50857100 |
| O  | 5.57106400  | 2.12117000  | -1.90168800 |
| C  | 6.38653600  | 3.29953200  | -1.83803500 |
| C  | 3.65033000  | 1.01843300  | -0.53331400 |
| C  | 2.42976000  | 1.04302700  | -1.13914800 |
| H  | 0.84402000  | -3.80874100 | -3.87626800 |
| H  | 2.45179500  | -3.04935300 | -3.96757600 |
| H  | 1.40228900  | -1.37515600 | -5.33593600 |
| H  | -0.22438200 | -1.87257300 | -4.81135900 |
| H  | 6.10867600  | 3.97073700  | -2.66003200 |
| H  | 5.87325400  | 4.98606700  | -0.49398800 |
| H  | 7.43812500  | 3.02165600  | -1.95877400 |
| C  | 2.09332000  | 2.10223500  | -2.17506900 |
| H  | 1.29039900  | 2.75792600  | -1.81524700 |
| H  | 2.95413600  | 2.73293800  | -2.43173200 |
| H  | 1.73008600  | 1.63252500  | -3.09429100 |
| H  | 6.89739000  | 3.74125500  | 0.26335200  |
| Si | 4.20824700  | -0.29371000 | 0.70387900  |
| C  | 4.21372900  | -1.96606700 | -0.05904800 |
| C  | 4.24937800  | -3.06808100 | -0.57704700 |
| C  | 4.26179500  | -4.38090900 | -1.21206200 |
| H  | 3.28769100  | -4.59603300 | -1.66561500 |
| H  | 5.01915500  | -4.43263000 | -2.00298200 |
| H  | 4.48471800  | -5.17541400 | -0.49017300 |
| C  | -3.28065900 | 1.80162300  | -0.51343800 |
| C  | -3.66540700 | 0.84809600  | 0.42503800  |
| C  | -4.90669700 | 0.14090700  | 0.27023600  |
| C  | -5.71896300 | 0.38847600  | -0.88317700 |
| C  | -5.28036600 | 1.34584800  | -1.83476000 |
| C  | -4.10653100 | 2.03091000  | -1.64868200 |
| H  | -4.77963900 | -0.98740700 | 2.11554900  |
| C  | -5.37575500 | -0.79969800 | 1.22892200  |
| C  | -6.94187600 | -0.31631000 | -1.04008200 |
| H  | -5.89648500 | 1.53732100  | -2.70974800 |
| H  | -3.79606200 | 2.77922200  | -2.37133200 |
| C  | -7.36332700 | -1.22376300 | -0.09443000 |
| C  | -6.57175000 | -1.46168400 | 1.05338000  |



|   |             |             |             |
|---|-------------|-------------|-------------|
| H | -7.54410100 | -0.12092600 | -1.92379600 |
| H | -8.30234500 | -1.75398900 | -0.22401300 |
| H | -6.91110600 | -2.17128000 | 1.80286800  |
| C | -2.84209600 | 0.62203600  | 1.66121600  |
| C | -3.17798500 | 1.40718500  | 2.82524200  |
| C | -1.77142200 | -0.26990200 | 1.72381200  |
| C | -4.27654800 | 2.31452500  | 2.83408300  |
| C | -2.39472700 | 1.29554800  | 4.01863100  |
| C | -0.99129900 | -0.34430100 | 2.92083700  |
| C | -4.57839400 | 3.05795200  | 3.95465400  |
| H | -4.88572500 | 2.41388400  | 1.94368400  |
| C | -2.72984200 | 2.07560500  | 5.15674000  |
| C | -1.28935500 | 0.40805900  | 4.02615700  |
| H | -0.14216200 | -1.01769000 | 2.95895600  |
| C | -3.79973100 | 2.94043700  | 5.12960200  |
| H | -5.42442600 | 3.73885000  | 3.93625700  |
| H | -2.12074500 | 1.97656900  | 6.05144900  |
| H | -0.67788400 | 0.32912200  | 4.92109000  |
| H | -4.04780200 | 3.53316500  | 6.00515500  |
| C | -1.98378800 | 2.59367400  | -0.38330300 |
| H | -1.61043300 | 2.50849600  | 0.64071300  |
| H | -1.21909500 | 2.12190700  | -1.01603400 |
| C | -2.10147000 | 4.06223200  | -0.74906800 |
| C | -2.79733600 | 4.94938600  | 0.08623500  |
| C | -1.51551200 | 4.56659200  | -1.91677600 |
| C | -2.90450700 | 6.30077400  | -0.23867200 |
| H | -3.25152600 | 4.57559600  | 1.00063300  |
| C | -1.62133300 | 5.92081300  | -2.24566900 |
| H | -0.96574300 | 3.89427600  | -2.57108200 |
| C | -2.31718100 | 6.79189200  | -1.40790100 |
| H | -3.44355000 | 6.97345800  | 0.42297900  |
| H | -1.15619800 | 6.29250100  | -3.15451600 |
| H | -2.39871000 | 7.84546000  | -1.65972000 |
| C | -2.34214900 | -1.76510300 | -0.90180100 |
| C | -3.24930100 | -2.81613600 | -0.69027200 |
| C | -2.34302900 | -1.11567900 | -2.14733600 |
| C | -4.14523200 | -3.20203100 | -1.68474400 |
| H | -3.25632400 | -3.35354200 | 0.25055100  |
| C | -3.23440700 | -1.49079800 | -3.15151500 |
| H | -1.63178700 | -0.32042000 | -2.34119300 |
| C | -4.12401800 | -2.52823400 | -2.90040800 |
| H | -4.85215500 | -4.00950000 | -1.52959500 |
| H | -3.24695500 | -0.99073100 | -4.11377800 |
| C | -0.68258700 | -2.88872900 | 1.17754500  |

|    |             |             |             |
|----|-------------|-------------|-------------|
| C  | -1.50838100 | -3.43967000 | 2.17347100  |
| C  | 0.46948000  | -3.59045900 | 0.78713400  |
| C  | -1.20384600 | -4.66644300 | 2.75986500  |
| H  | -2.38901800 | -2.90208200 | 2.51125200  |
| C  | 0.78393100  | -4.82036500 | 1.36666100  |
| H  | 1.12480000  | -3.17443600 | 0.02925400  |
| C  | -0.05910400 | -5.33830600 | 2.34152100  |
| H  | -1.82975000 | -5.10061300 | 3.53207700  |
| H  | 1.67440500  | -5.36862900 | 1.07946800  |
| P  | -1.05755400 | -1.28949300 | 0.33454400  |
| F  | -4.98523400 | -2.90011100 | -3.86852300 |
| F  | 0.24208400  | -6.52344000 | 2.90781800  |
| Pt | 0.86358100  | -0.13445600 | -0.56223700 |
| C  | 5.99820400  | 0.06250600  | 1.23539900  |
| C  | 7.07380700  | -0.73527200 | 0.80678000  |
| C  | 6.29170100  | 1.14144000  | 2.09284700  |
| C  | 8.38481500  | -0.46804400 | 1.20819300  |
| H  | 6.87880700  | -1.58107800 | 0.15311900  |
| C  | 7.59981500  | 1.41404800  | 2.49828500  |
| H  | 5.49208100  | 1.78962000  | 2.44206700  |
| C  | 8.65145400  | 0.60821200  | 2.05547900  |
| H  | 9.19719700  | -1.10144500 | 0.86098500  |
| H  | 7.79752400  | 2.25070600  | 3.16374700  |
| H  | 9.67024600  | 0.81685100  | 2.37158800  |
| C  | 3.14301100  | -0.33304600 | 2.26874600  |
| H  | 2.11242800  | -0.59995700 | 2.01147500  |
| H  | 3.52257000  | -1.06904300 | 2.98541000  |
| H  | 3.12904600  | 0.64848200  | 2.75478300  |

28

### A1

imaginary frequencies no

E(M06L/LanL2DZ(Pd),6-311G(d,p))=-793.070898

H(M06L/LanL2DZ(Pd),6-311G(d,p))=-793.05317

G(M06L/LanL2DZ(Pd),6-311G(d,p))=-793.116882

E(M06L/def2TZVP)=-793.118361473

|    |             |             |             |
|----|-------------|-------------|-------------|
| Si | -0.66058500 | 0.05302200  | 0.64797700  |
| C  | 1.14314400  | -0.03192500 | 0.13302500  |
| C  | 1.97192100  | 1.08798300  | 0.29004100  |
| C  | 1.71283500  | -1.20481300 | -0.37510800 |
| C  | 3.31994700  | 1.03703100  | -0.04259900 |
| H  | 1.55415100  | 2.01879100  | 0.66935000  |
| C  | 3.06194900  | -1.26064000 | -0.71033800 |
| H  | 1.08686500  | -2.08322400 | -0.51435400 |

|   |             |             |             |
|---|-------------|-------------|-------------|
| C | 3.86777000  | -0.14031100 | -0.54324300 |
| H | 3.94456400  | 1.91620800  | 0.08447900  |
| H | 3.48477800  | -2.17962600 | -1.10506200 |
| H | 4.92029200  | -0.18179600 | -0.80607700 |
| C | -0.79278300 | 0.18930800  | 2.50836000  |
| H | -0.26489500 | 1.07867300  | 2.86366500  |
| H | -1.83414500 | 0.26512400  | 2.82942800  |
| H | -0.34826300 | -0.68233800 | 2.99521900  |
| C | -1.42720800 | 1.52870200  | -0.10129600 |
| C | -1.91152000 | 2.53343400  | -0.58322400 |
| C | -1.50342100 | -1.45546400 | 0.06783300  |
| C | -2.04234400 | -2.47819200 | -0.30614300 |
| C | -2.49573500 | 3.72088700  | -1.16271400 |
| H | -3.55868800 | 3.79971000  | -0.91782800 |
| H | -2.00421800 | 4.62603200  | -0.79488900 |
| H | -2.40610600 | 3.71572400  | -2.25253600 |
| C | -2.69088700 | -3.68831600 | -0.75560500 |
| H | -2.16923000 | -4.57797800 | -0.39163000 |
| H | -3.72289200 | -3.74115600 | -0.39787100 |
| H | -2.71603500 | -3.74255300 | -1.84750300 |

18

**B1**

imaginary frequencies no

E(M06L/LanL2DZ(Pd),6-311G(d,p))=-507.916838

H(M06L/LanL2DZ(Pd),6-311G(d,p))=-507.90651

G(M06L/LanL2DZ(Pd),6-311G(d,p))=-507.953648

E(M06L/def2TZVP)=-507.973038208

|   |             |             |             |
|---|-------------|-------------|-------------|
| B | -0.83906100 | -0.00004800 | 0.00000000  |
| B | 0.83906000  | -0.00004500 | -0.00000200 |
| O | 1.59402500  | 1.12841000  | -0.17839100 |
| O | 1.59410100  | -1.12844700 | 0.17839000  |
| O | -1.59410500 | -1.12847600 | -0.17821100 |
| O | -1.59402500 | 1.12843800  | 0.17821000  |
| C | -2.97330400 | 0.74528200  | 0.18124700  |
| C | -2.97335700 | -0.74522200 | -0.18124900 |
| C | 2.97335700  | -0.74520700 | 0.18132400  |
| C | 2.97330600  | 0.74526500  | -0.18131800 |
| H | -3.51611400 | -1.36333500 | 0.53914300  |
| H | -3.51601700 | 1.36343300  | -0.53914700 |
| H | -3.38891300 | 0.94068100  | 1.17515700  |
| H | -3.38897800 | -0.94059100 | -1.17516000 |
| H | 3.38902800  | -0.94048900 | 1.17523000  |
| H | 3.51606800  | -1.36339500 | -0.53904000 |

|   |            |            |             |
|---|------------|------------|-------------|
| H | 3.38897000 | 0.94057500 | -1.17522200 |
| H | 3.51597200 | 1.36348900 | 0.53904800  |

47

**PtL3**

imaginary frequencies no

E(M06L/LanL2DZ(Pd),6-311G(d,p))=-1498.807304

H(M06L/LanL2DZ(Pd),6-311G(d,p))=-1498.781117

G(M06L/LanL2DZ(Pd),6-311G(d,p))=-1498.865899

E(M06L/def2TZVP)=-1499.17359209

|    |             |             |             |
|----|-------------|-------------|-------------|
| P  | 0.07548500  | -0.00213700 | 0.45518200  |
| Pt | 0.27913600  | 0.17927000  | 2.56752000  |
| C  | -0.69199500 | 1.43687600  | -0.36362500 |
| C  | -1.70824600 | 2.12713800  | 0.29747300  |
| C  | -0.33657300 | 1.84729000  | -1.65505600 |
| C  | -2.37176100 | 3.18791400  | -0.30689300 |
| H  | -1.96765500 | 1.82869600  | 1.31080200  |
| C  | -0.98328100 | 2.90694000  | -2.26584700 |
| H  | 0.45968800  | 1.33497500  | -2.18734900 |
| C  | -2.00913900 | 3.58208300  | -1.59724000 |
| H  | -3.15497700 | 3.70417600  | 0.23483800  |
| H  | -0.71109800 | 3.23694600  | -3.26258500 |
| C  | 1.64589500  | -0.23383800 | -0.44490900 |
| C  | 1.75524400  | -1.05570900 | -1.57403700 |
| C  | 2.77433500  | 0.46947300  | -0.02231400 |
| C  | 2.95232700  | -1.16309600 | -2.25946900 |
| H  | 0.89439800  | -1.62270700 | -1.91724300 |
| C  | 3.98031800  | 0.37755800  | -0.70573000 |
| H  | 2.70060300  | 1.08828300  | 0.86913800  |
| C  | 4.07211700  | -0.44299400 | -1.83284500 |
| H  | 3.04958600  | -1.80146300 | -3.13087500 |
| H  | 4.83910000  | 0.93444600  | -0.35067100 |
| C  | -0.94475500 | -1.41439500 | -0.08850600 |
| C  | -1.89514100 | -1.31862700 | -1.10250300 |
| C  | -0.74382300 | -2.66090900 | 0.52381500  |
| C  | -2.63262400 | -2.42922700 | -1.50751300 |
| H  | -2.07521800 | -0.36439300 | -1.58894600 |
| C  | -1.46066400 | -3.77114700 | 0.12637800  |
| H  | -0.01904400 | -2.74029300 | 1.33065600  |
| C  | -2.41483600 | -3.66196800 | -0.89319200 |
| H  | -3.36988800 | -2.32059400 | -2.29371200 |
| H  | -1.31337000 | -4.73832900 | 0.59420700  |
| O  | 5.19866600  | -0.61152800 | -2.57010300 |
| O  | -3.07473700 | -4.80562900 | -1.20533800 |

|   |             |             |             |
|---|-------------|-------------|-------------|
| O | -2.58259800 | 4.60634200  | -2.27788300 |
| C | -4.05148400 | -4.73565300 | -2.22365200 |
| H | -4.45982800 | -5.74005500 | -2.32040800 |
| H | -4.85933400 | -4.04181400 | -1.96250900 |
| H | -3.61538200 | -4.43020800 | -3.18219200 |
| C | -3.61462000 | 5.32108000  | -1.62898900 |
| H | -3.93494200 | 6.09097000  | -2.32886400 |
| H | -4.46703800 | 4.67426400  | -1.39044800 |
| H | -3.25930800 | 5.79712700  | -0.70767400 |
| C | 6.35137900  | 0.09976800  | -2.16722600 |
| H | 7.13272200  | -0.16357300 | -2.87799500 |
| H | 6.18837000  | 1.18354200  | -2.19637600 |
| H | 6.67103300  | -0.18581400 | -1.15821900 |

65

### Cplx3

imaginary frequencies no

E(M06L/LanL2DZ(Pd),6-311G(d,p))=-2006.774326

H(M06L/LanL2DZ(Pd),6-311G(d,p))=-2006.737713

G(M06L/LanL2DZ(Pd),6-311G(d,p))=-2006.845673

E(M06L/def2TZVP)=-2007.19134048

|   |             |             |             |
|---|-------------|-------------|-------------|
| P | -0.61577900 | -0.08512000 | 0.09976600  |
| C | -1.23638200 | 1.63087900  | 0.00600400  |
| C | -0.49859800 | 2.57814200  | -0.70486400 |
| C | -2.42927900 | 2.03773600  | 0.62061000  |
| C | -0.91465400 | 3.90322000  | -0.78752500 |
| H | 0.40578500  | 2.25933500  | -1.22077700 |
| C | -2.85411700 | 3.35088600  | 0.54731000  |
| H | -3.03957400 | 1.31007000  | 1.15033500  |
| C | -2.09639000 | 4.29468800  | -0.15550400 |
| H | -0.32592300 | 4.61214000  | -1.35789900 |
| H | -3.77732200 | 3.67545700  | 1.01499500  |
| C | -2.15934600 | -1.05183200 | 0.22957400  |
| C | -2.61522500 | -1.62682500 | 1.42103000  |
| C | -2.94108700 | -1.19397700 | -0.91802400 |
| C | -3.81912800 | -2.31009000 | 1.46366500  |
| H | -2.01947100 | -1.54139900 | 2.32530700  |
| C | -4.15367400 | -1.86949200 | -0.88877100 |
| H | -2.59183800 | -0.76830800 | -1.85614300 |
| C | -4.60007500 | -2.43013300 | 0.31137600  |
| H | -4.18000600 | -2.76032500 | 2.38205000  |
| H | -4.73707600 | -1.95876000 | -1.79721700 |
| C | 0.16174800  | -0.21543500 | 1.74164500  |
| C | -0.24766500 | 0.55621800  | 2.83878000  |

|    |             |             |             |
|----|-------------|-------------|-------------|
| C  | 1.21539900  | -1.11227600 | 1.91553700  |
| C  | 0.37470000  | 0.42935400  | 4.06650000  |
| H  | -1.05265100 | 1.27736500  | 2.72767100  |
| C  | 1.84355100  | -1.25676900 | 3.14614600  |
| H  | 1.57105300  | -1.68325700 | 1.06098400  |
| C  | 1.42582000  | -0.48120800 | 4.22781400  |
| H  | 0.07293300  | 1.02753900  | 4.91916500  |
| H  | 2.67158700  | -1.94825900 | 3.24036200  |
| O  | -5.76691800 | -3.10838700 | 0.45514000  |
| O  | 1.97646300  | -0.52844200 | 5.46669600  |
| O  | -2.60001500 | 5.55399700  | -0.17631500 |
| C  | 3.04904300  | -1.42748500 | 5.66654700  |
| H  | 3.34471000  | -1.31760400 | 6.70859100  |
| H  | 2.74498800  | -2.46507300 | 5.48567200  |
| H  | 3.90231300  | -1.18849300 | 5.02151700  |
| C  | -1.87267500 | 6.53343200  | -0.88994300 |
| H  | -2.43240600 | 7.46118600  | -0.78528900 |
| H  | -0.86663000 | 6.67049300  | -0.47663200 |
| H  | -1.79003800 | 6.28003700  | -1.95322000 |
| C  | -6.58319700 | -3.24951500 | -0.68947600 |
| H  | -7.46174900 | -3.80563700 | -0.36715300 |
| H  | -6.89766400 | -2.27647800 | -1.08483100 |
| H  | -6.07457300 | -3.80948600 | -1.48290400 |
| Pt | 0.73800100  | -0.61457100 | -1.53357900 |
| C  | 2.94648800  | 2.02949200  | 0.81347700  |
| C  | 3.10787500  | 2.76185000  | -0.51542800 |
| H  | 1.91623400  | 2.09174800  | 1.19541000  |
| H  | 3.62412700  | 2.38173800  | 1.59588500  |
| H  | 2.36247300  | 3.54899900  | -0.66647400 |
| H  | 4.10388100  | 3.20908400  | -0.62755800 |
| C  | 2.65902900  | -2.56314100 | -3.22344400 |
| C  | 2.97920300  | -3.22516500 | -1.89075600 |
| H  | 1.75547600  | -2.94244600 | -3.70336100 |
| H  | 3.49239300  | -2.61769500 | -3.93232400 |
| H  | 2.07042800  | -3.60845700 | -1.40678000 |
| H  | 3.70747200  | -4.03546600 | -1.97415500 |
| B  | 3.05302700  | 0.51955600  | -0.86270500 |
| B  | 3.04174200  | -0.98102900 | -1.58471600 |
| O  | 3.23926300  | 0.67039100  | 0.50086700  |
| O  | 2.94195200  | 1.74677900  | -1.50687100 |
| O  | 3.51917500  | -2.17638100 | -1.08637900 |
| O  | 2.47153600  | -1.17204000 | -2.88928500 |

**TSO1C1**

imaginary frequencies -79.81

E(M06L/LanL2DZ(Pd),6-311G(d,p))=-2006.765205

H(M06L/LanL2DZ(Pd),6-311G(d,p))=-2006.728715

G(M06L/LanL2DZ(Pd),6-311G(d,p))=-2006.837176

E(M06L/def2TZVP)=-2007.18327688

|   |             |             |             |
|---|-------------|-------------|-------------|
| P | -0.76318300 | -0.03824700 | 0.10415000  |
| C | -1.30874200 | 1.28940600  | -1.02648900 |
| C | -0.35827500 | 1.92248900  | -1.83005500 |
| C | -2.63951900 | 1.72440700  | -1.09847300 |
| C | -0.71209700 | 2.96689900  | -2.67660600 |
| H | 0.67194200  | 1.57180800  | -1.81116800 |
| C | -3.00419200 | 2.76039700  | -1.93849000 |
| H | -3.40288600 | 1.23354100  | -0.50025000 |
| C | -2.04126800 | 3.39080100  | -2.73364200 |
| H | 0.04922300  | 3.42832900  | -3.29435400 |
| H | -4.03240400 | 3.09893300  | -2.00576200 |
| C | -2.27941200 | -1.02701800 | 0.34660900  |
| C | -2.86788300 | -1.23790200 | 1.59896000  |
| C | -2.84863800 | -1.65160800 | -0.76556200 |
| C | -3.99418000 | -2.03215400 | 1.72984000  |
| H | -2.44007200 | -0.77497600 | 2.48317000  |
| C | -3.98252200 | -2.44451500 | -0.65056900 |
| H | -2.39777400 | -1.51438100 | -1.74560300 |
| C | -4.56203300 | -2.63802700 | 0.60676200  |
| H | -4.45628700 | -2.19973300 | 2.69645100  |
| H | -4.40115300 | -2.90905600 | -1.53530200 |
| C | -0.50432100 | 0.80254300  | 1.70160700  |
| C | -1.38334800 | 1.78763700  | 2.17554300  |
| C | 0.60519600  | 0.47070000  | 2.47689800  |
| C | -1.15968500 | 2.41389300  | 3.38642100  |
| H | -2.24908600 | 2.07395000  | 1.58422100  |
| C | 0.84343300  | 1.09466400  | 3.69718700  |
| H | 1.30987600  | -0.26436500 | 2.09814400  |
| C | -0.04224900 | 2.06922500  | 4.15740900  |
| H | -1.83002200 | 3.17989800  | 3.76081100  |
| H | 1.72190800  | 0.82032900  | 4.26843900  |
| O | -5.66534000 | -3.39447100 | 0.83598000  |
| O | 0.09289200  | 2.74265900  | 5.32743300  |
| O | -2.49804600 | 4.38884400  | -3.53164000 |
| C | 1.20796600  | 2.42335600  | 6.13518300  |
| H | 1.13244500  | 3.05646900  | 7.01752800  |
| H | 1.19568200  | 1.37169500  | 6.44357300  |
| H | 2.15312600  | 2.63273500  | 5.62084100  |

|    |             |             |             |
|----|-------------|-------------|-------------|
| C  | -1.55963100 | 5.02833900  | -4.37315900 |
| H  | -2.11752500 | 5.77518700  | -4.93540300 |
| H  | -0.77188900 | 5.52642900  | -3.79595700 |
| H  | -1.09682200 | 4.32172500  | -5.07171600 |
| C  | -6.26163200 | -4.02947100 | -0.27638600 |
| H  | -7.11621900 | -4.58043300 | 0.11248300  |
| H  | -6.61002000 | -3.30220900 | -1.01925500 |
| H  | -5.57157800 | -4.73042100 | -0.76045400 |
| Pt | 1.10223900  | -1.00762900 | -0.61148900 |
| C  | 3.41689100  | 2.02676800  | 0.44162700  |
| C  | 3.63878900  | 2.16309400  | -1.06400100 |
| H  | 2.48031100  | 2.51060900  | 0.75810100  |
| H  | 4.23380900  | 2.43693100  | 1.04218300  |
| H  | 3.10448500  | 3.01432400  | -1.49946200 |
| H  | 4.70119800  | 2.25902200  | -1.32413500 |
| C  | 3.66173700  | -3.77972500 | -1.59711500 |
| C  | 4.55925000  | -3.54500300 | -0.38297000 |
| H  | 2.86067400  | -4.49953700 | -1.39864800 |
| H  | 4.20563800  | -4.10449900 | -2.48685800 |
| H  | 4.47143100  | -4.32640600 | 0.37544600  |
| H  | 5.61703700  | -3.44796900 | -0.65302500 |
| B  | 2.93015500  | 0.05428800  | -0.55494600 |
| B  | 3.28122900  | -1.70893300 | -0.74397700 |
| O  | 3.31549500  | 0.62554400  | 0.66285800  |
| O  | 3.13338300  | 0.94997700  | -1.61575500 |
| O  | 4.11175600  | -2.30340400 | 0.17346900  |
| O  | 3.06727200  | -2.49803600 | -1.85718800 |

65

### C1

imaginary frequencies no

E(M06L/LanL2DZ(Pd),6-311G(d,p))=-2006.778141

H(M06L/LanL2DZ(Pd),6-311G(d,p))=-2006.740972

G(M06L/LanL2DZ(Pd),6-311G(d,p))=-2006.850945

E(M06L/def2TZVP)=-2007.19422333

|   |             |             |             |
|---|-------------|-------------|-------------|
| P | 0.87405700  | -0.03299400 | -0.04436000 |
| C | 1.42488100  | 0.22375600  | 1.67374900  |
| C | 0.44651900  | 0.47584800  | 2.63972100  |
| C | 2.76753800  | 0.19029400  | 2.06908700  |
| C | 0.79279000  | 0.69926200  | 3.96692500  |
| H | -0.60138400 | 0.50265700  | 2.34688900  |
| C | 3.12170500  | 0.40129200  | 3.39004700  |
| H | 3.54411500  | -0.00787200 | 1.33558900  |
| C | 2.13629700  | 0.65827600  | 4.34805600  |



|    |             |             |             |
|----|-------------|-------------|-------------|
| H  | 0.01193300  | 0.89286700  | 4.69225600  |
| H  | 4.15778300  | 0.37284800  | 3.70905800  |
| C  | 2.36977200  | -0.63391500 | -0.89718800 |
| C  | 3.25271700  | 0.20830100  | -1.58547700 |
| C  | 2.65982100  | -1.99823900 | -0.84940400 |
| C  | 4.38497500  | -0.29803900 | -2.19700900 |
| H  | 3.04600000  | 1.27318600  | -1.64454200 |
| C  | 3.79867600  | -2.52074200 | -1.45010000 |
| H  | 1.98471800  | -2.67330600 | -0.32771300 |
| C  | 4.66826400  | -1.66591800 | -2.13166900 |
| H  | 5.07166500  | 0.34555400  | -2.73614200 |
| H  | 3.99341200  | -3.58479000 | -1.39274100 |
| C  | 0.63460200  | 1.65771200  | -0.68392600 |
| C  | 1.16707900  | 2.79702700  | -0.06600800 |
| C  | -0.14465900 | 1.82442100  | -1.82974700 |
| C  | 0.92692500  | 4.05885100  | -0.57954700 |
| H  | 1.76841700  | 2.69447900  | 0.83320200  |
| C  | -0.39339200 | 3.08635200  | -2.35665700 |
| H  | -0.58868800 | 0.95398600  | -2.30587200 |
| C  | 0.14094900  | 4.21230400  | -1.72708300 |
| H  | 1.32961600  | 4.94800600  | -0.10637900 |
| H  | -1.01502000 | 3.17793200  | -3.23923700 |
| O  | 5.80094800  | -2.06448700 | -2.76156500 |
| O  | -0.05180000 | 5.48957000  | -2.14347500 |
| O  | 2.58267900  | 0.85093800  | 5.61520600  |
| C  | -0.86750000 | 5.68470900  | -3.28101200 |
| H  | -0.90690200 | 6.76026600  | -3.44404600 |
| H  | -0.44653900 | 5.19996800  | -4.16968300 |
| H  | -1.88409200 | 5.30690600  | -3.11778600 |
| C  | 1.61656700  | 1.11046200  | 6.61345200  |
| H  | 2.16925800  | 1.23353700  | 7.54329000  |
| H  | 1.05483500  | 2.02852200  | 6.40462300  |
| H  | 0.91162500  | 0.27780300  | 6.72109200  |
| C  | 6.11650000  | -3.44192900 | -2.72545800 |
| H  | 7.04539800  | -3.55324800 | -3.28188100 |
| H  | 6.26722100  | -3.79526300 | -1.69864200 |
| H  | 5.33672700  | -4.04777500 | -3.20129700 |
| Pt | -1.25490000 | -1.23742500 | -0.17026000 |
| C  | -3.82716100 | 2.02182900  | -0.69884700 |
| C  | -3.32787900 | 2.25669000  | 0.72907800  |
| H  | -3.66010500 | 2.88140400  | -1.35565400 |
| H  | -4.89199700 | 1.76162100  | -0.72947600 |
| H  | -2.61059400 | 3.08582600  | 0.78837900  |
| H  | -4.13437500 | 2.44918000  | 1.44167700  |

|   |             |             |             |
|---|-------------|-------------|-------------|
| C | -5.27553700 | -2.77289100 | -0.19102600 |
| C | -4.42514000 | -4.04390400 | -0.25828100 |
| H | -5.99843700 | -2.78310700 | 0.62983700  |
| H | -5.82344400 | -2.58723400 | -1.12286700 |
| H | -4.48540600 | -4.63639300 | 0.66272600  |
| H | -4.69052200 | -4.69459600 | -1.09643000 |
| B | -2.46249500 | 0.32894000  | -0.08266200 |
| B | -3.06076100 | -2.21125100 | -0.19463500 |
| O | -3.06848400 | 0.91108300  | -1.17419400 |
| O | -2.66041800 | 1.04424600  | 1.08319000  |
| O | -3.08452400 | -3.57893500 | -0.42508200 |
| O | -4.33832800 | -1.71593800 | 0.01390600  |

93

**(S)-Cplx4**

imaginary frequencies no

E(M06L/LanL2DZ(Pd),6-311G(d,p))=-2799.884445

H(M06L/LanL2DZ(Pd),6-311G(d,p))=-2799.829768

G(M06L/LanL2DZ(Pd),6-311G(d,p))=-2799.977873

E(M06L/def2TZVP)=-2800.34693571

|    |             |             |             |
|----|-------------|-------------|-------------|
| P  | 1.69129000  | 0.35101500  | 0.22491700  |
| Pt | -0.53146900 | -0.26948900 | -0.35950500 |
| C  | 1.82632000  | 1.08825500  | 1.88567600  |
| C  | 3.07007600  | 1.33482900  | 2.48903400  |
| C  | 0.67087000  | 1.38210500  | 2.60807900  |
| C  | 3.14978500  | 1.88417500  | 3.75355300  |
| C  | 0.73526400  | 1.93149100  | 3.88456400  |
| C  | 1.97982800  | 2.18933300  | 4.46052900  |
| C  | 2.95913200  | -0.96308200 | 0.28202600  |
| C  | 2.71583700  | -2.06900200 | 1.11175100  |
| C  | 4.13441900  | -0.93837000 | -0.46382100 |
| C  | 3.62103400  | -3.10825400 | 1.19265800  |
| C  | 5.05363100  | -1.98463300 | -0.39622700 |
| C  | 4.79767600  | -3.07541000 | 0.43442200  |
| O  | 2.16211900  | 2.72128100  | 5.69336900  |
| C  | 2.37051900  | 1.56617700  | -0.94742100 |
| C  | 2.18941600  | 1.28925000  | -2.31373800 |
| C  | 2.97715700  | 2.76539600  | -0.58512200 |
| C  | 2.62238600  | 2.17761000  | -3.27708300 |
| C  | 3.40474700  | 3.67686600  | -1.54923800 |
| C  | 3.23151000  | 3.38200400  | -2.90127300 |
| O  | 5.61772800  | -4.14903500 | 0.57217900  |
| O  | 3.61071200  | 4.19182100  | -3.92175100 |
| C  | 6.81153300  | -4.15334600 | -0.18279400 |

|    |             |             |             |
|----|-------------|-------------|-------------|
| C  | 1.00538000  | 3.02986000  | 6.44620700  |
| C  | 4.21870000  | 5.42178900  | -3.58489400 |
| B  | 0.26579600  | -2.11716900 | -0.91457900 |
| B  | -1.83653300 | -1.90074500 | -0.36129600 |
| H  | 3.98576700  | 1.08116900  | 1.96000600  |
| H  | -0.29859200 | 1.16189400  | 2.16547800  |
| H  | 4.10530400  | 2.07796300  | 4.22859800  |
| H  | -0.18286800 | 2.14101800  | 4.41949900  |
| H  | 1.79635100  | -2.11655100 | 1.68923900  |
| H  | 4.34522800  | -0.09581900 | -1.11600100 |
| H  | 3.43955300  | -3.96559400 | 1.83198700  |
| H  | 5.95631100  | -1.93625700 | -0.99332900 |
| H  | 1.69539900  | 0.36502100  | -2.60851900 |
| H  | 3.10662100  | 3.01555500  | 0.46400600  |
| H  | 2.48920800  | 1.97380700  | -4.33391000 |
| H  | 3.86402200  | 4.60631700  | -1.23441100 |
| H  | 7.45995200  | -3.30935300 | 0.08051600  |
| H  | 6.60897200  | -4.12366300 | -1.26005500 |
| H  | 7.32028400  | -5.08473100 | 0.06017800  |
| H  | 0.40531800  | 2.13531800  | 6.64816100  |
| H  | 0.37963200  | 3.77204200  | 5.93714900  |
| H  | 1.35987000  | 3.44436000  | 7.38803400  |
| H  | 5.14712200  | 5.27328400  | -3.02073300 |
| H  | 3.54489300  | 6.05994600  | -3.00113600 |
| H  | 4.44868700  | 5.91369300  | -4.52840800 |
| O  | -2.23129700 | -2.45854600 | 0.83150900  |
| O  | -2.50376000 | -2.45142400 | -1.44443800 |
| O  | 1.05518500  | -2.08557300 | -2.05859600 |
| O  | 0.29969700  | -3.37502800 | -0.32646100 |
| Si | -3.98202300 | 0.77976500  | -1.10607900 |
| C  | -4.12584500 | 0.07818800  | -2.82739500 |
| H  | -3.64513500 | -0.90128000 | -2.87348300 |
| H  | -5.17219000 | -0.02044100 | -3.12989200 |
| H  | -3.63486700 | 0.73699600  | -3.54741600 |
| C  | -2.23431800 | 1.03610700  | -0.62325300 |
| C  | -1.22230400 | 1.76861800  | -0.37101300 |
| C  | -4.79282100 | 2.42319700  | -1.05589800 |
| C  | -5.31874300 | 3.51817300  | -1.00093000 |
| C  | -4.83595300 | -0.31732600 | 0.16045500  |
| C  | -5.96902700 | -1.06838900 | -0.17959300 |
| C  | -4.42167900 | -0.32876100 | 1.49882100  |
| C  | -6.67316000 | -1.79017200 | 0.77972700  |
| H  | -6.31427700 | -1.08697500 | -1.21140000 |
| C  | -5.12168900 | -1.04446400 | 2.46282000  |

|   |             |             |             |
|---|-------------|-------------|-------------|
| H | -3.52599600 | 0.21901300  | 1.78419300  |
| C | -6.25367200 | -1.77196600 | 2.10616900  |
| H | -7.55023800 | -2.36323700 | 0.49382600  |
| H | -4.77998300 | -1.04313000 | 3.49345700  |
| H | -6.80266800 | -2.33002500 | 2.85885900  |
| C | -0.64817600 | 3.11099700  | -0.22929500 |
| H | 0.02481100  | 3.32673200  | -1.06593700 |
| H | -1.43219300 | 3.87477100  | -0.21423100 |
| H | -0.04827700 | 3.20805300  | 0.68142000  |
| C | -5.94956200 | 4.81721600  | -0.93946400 |
| H | -6.73857100 | 4.84051800  | -0.18212300 |
| H | -5.22766700 | 5.59937000  | -0.68644100 |
| H | -6.40370300 | 5.08655600  | -1.89754200 |
| C | 1.77254100  | -3.31788400 | -2.13994200 |
| C | 1.03921800  | -4.24894100 | -1.17912500 |
| C | -3.31475000 | -3.52637200 | -0.96678500 |
| C | -3.21553000 | -3.45607200 | 0.56255700  |
| H | 0.33575900  | -4.91379200 | -1.69649500 |
| H | 1.71344900  | -4.86219900 | -0.57383900 |
| H | 1.77428800  | -3.67346600 | -3.17382900 |
| H | 2.81071900  | -3.14075300 | -1.82868100 |
| H | -4.16096400 | -3.15966200 | 1.02884100  |
| H | -2.89075200 | -4.40249500 | 1.00738500  |
| H | -4.33889600 | -3.39253600 | -1.33262800 |
| H | -2.92401800 | -4.46675000 | -1.37319800 |

93

**(S)-TSC1D1**

imaginary frequencies -149.87

E(M06L/LanL2DZ(Pd),6-311G(d,p))=-2799.870757

H(M06L/LanL2DZ(Pd),6-311G(d,p))=-2799.817326

G(M06L/LanL2DZ(Pd),6-311G(d,p))=-2799.961336

E(M06L/def2TZVP)=-2800.33583864

|    |             |             |             |
|----|-------------|-------------|-------------|
| P  | 1.83607900  | 0.32969200  | 0.11050600  |
| Pt | -0.41320800 | -0.15657700 | -0.14247800 |
| C  | 2.26393800  | 1.43472700  | 1.49642000  |
| C  | 3.59596900  | 1.77169200  | 1.78591700  |
| C  | 1.26445600  | 1.89817200  | 2.34655200  |
| C  | 3.90620100  | 2.57176500  | 2.86721200  |
| C  | 1.56119200  | 2.69968900  | 3.44562600  |
| C  | 2.88752700  | 3.04417100  | 3.70519000  |
| C  | 2.91393600  | -1.10913400 | 0.44182600  |
| C  | 2.48285400  | -2.03094700 | 1.40722700  |
| C  | 4.13579300  | -1.32682100 | -0.18684800 |

|    |             |             |             |
|----|-------------|-------------|-------------|
| C  | 3.25146600  | -3.13202500 | 1.73050400  |
| C  | 4.91885100  | -2.43766600 | 0.12500300  |
| C  | 4.47789100  | -3.34368200 | 1.08936200  |
| O  | 3.29453400  | 3.81756000  | 4.74152000  |
| C  | 2.53744200  | 1.09078500  | -1.38569400 |
| C  | 2.44799400  | 0.35272600  | -2.57995300 |
| C  | 3.07045900  | 2.37593000  | -1.43344900 |
| C  | 2.90915200  | 0.88049500  | -3.76867400 |
| C  | 3.53086600  | 2.92009800  | -2.63152200 |
| C  | 3.45655900  | 2.16870700  | -3.80388700 |
| O  | 5.15581800  | -4.45865000 | 1.46635100  |
| O  | 3.87940500  | 2.59540700  | -5.02126200 |
| C  | 6.39681600  | -4.70484600 | 0.83867800  |
| C  | 2.29967100  | 4.30204900  | 5.62117100  |
| C  | 4.43022200  | 3.89340700  | -5.09971700 |
| B  | 0.13989500  | -2.13384200 | -0.55410200 |
| B  | -2.19889300 | -1.25807400 | 0.01027900  |
| H  | 4.39787400  | 1.39222300  | 1.15682200  |
| H  | 0.23559500  | 1.60738000  | 2.14878800  |
| H  | 4.93090300  | 2.84021400  | 3.09937800  |
| H  | 0.75937900  | 3.03694400  | 4.09140800  |
| H  | 1.51817200  | -1.89011700 | 1.88883000  |
| H  | 4.48698400  | -0.63105800 | -0.94399600 |
| H  | 2.92260300  | -3.85179700 | 2.47246800  |
| H  | 5.86147200  | -2.58293400 | -0.38905800 |
| H  | 2.00540600  | -0.64110600 | -2.55929700 |
| H  | 3.12854300  | 2.97650800  | -0.53070300 |
| H  | 2.84805900  | 0.32008400  | -4.69524800 |
| H  | 3.93851900  | 3.92384900  | -2.63547700 |
| H  | 7.11377700  | -3.89724300 | 1.02851500  |
| H  | 6.28434200  | -4.83260400 | -0.24453700 |
| H  | 6.77670900  | -5.62927400 | 1.27018200  |
| H  | 1.76457100  | 3.48326200  | 6.11567900  |
| H  | 1.57514500  | 4.93823000  | 5.09943900  |
| H  | 2.82172100  | 4.89382500  | 6.37105400  |
| H  | 5.32318300  | 3.99284700  | -4.47122500 |
| H  | 3.70265000  | 4.66040400  | -4.80888400 |
| H  | 4.70819500  | 4.04187900  | -6.14182000 |
| O  | -2.58664000 | -1.67647500 | 1.26359800  |
| O  | -2.85142600 | -1.95765300 | -1.00252600 |
| O  | 0.99114700  | -2.44748500 | -1.61017500 |
| O  | -0.20162900 | -3.28492400 | 0.14870300  |
| Si | -4.09192700 | 0.82635000  | -0.96363100 |
| C  | -4.08438200 | 0.41401300  | -2.78186400 |

|   |             |             |             |
|---|-------------|-------------|-------------|
| H | -3.74521900 | -0.61112300 | -2.94021900 |
| H | -5.08108300 | 0.53330100  | -3.21585800 |
| H | -3.40488700 | 1.08291500  | -3.31486600 |
| C | -2.37763300 | 0.74325500  | -0.23792100 |
| C | -1.47853300 | 1.66112900  | -0.00598100 |
| C | -4.60644300 | 2.57051800  | -0.73605000 |
| C | -4.98731700 | 3.71466800  | -0.58172000 |
| C | -5.33215700 | -0.21801700 | -0.01587700 |
| C | -6.09589300 | -1.20712200 | -0.64445200 |
| C | -5.54415700 | 0.00421100  | 1.35220100  |
| C | -7.03364100 | -1.95377300 | 0.06357500  |
| H | -5.95030500 | -1.40706300 | -1.70388500 |
| C | -6.47819800 | -0.73673400 | 2.06524400  |
| H | -4.95849500 | 0.76255500  | 1.86728500  |
| C | -7.22538800 | -1.71939500 | 1.42055200  |
| H | -7.61476500 | -2.71848600 | -0.44372100 |
| H | -6.62269100 | -0.55319500 | 3.12573000  |
| H | -7.95612200 | -2.30002600 | 1.97569000  |
| C | -1.31464900 | 3.11455300  | 0.13442400  |
| H | -0.46824300 | 3.47127700  | -0.46093400 |
| H | -2.21688400 | 3.66401800  | -0.15465700 |
| H | -1.08228500 | 3.37206000  | 1.17334600  |
| C | -5.42386800 | 5.07981700  | -0.39705200 |
| H | -6.21361000 | 5.14758100  | 0.35651800  |
| H | -4.59833800 | 5.71890700  | -0.06856900 |
| H | -5.81683200 | 5.50167800  | -1.32640900 |
| C | 1.37528100  | -3.81762300 | -1.50143900 |
| C | 0.39480700  | -4.41306900 | -0.49190600 |
| C | -3.42674100 | -3.11439200 | -0.39451200 |
| C | -3.44491200 | -2.80767200 | 1.10682000  |
| H | -0.39132900 | -5.00862300 | -0.97387000 |
| H | 0.88407300  | -5.04094100 | 0.25943700  |
| H | 1.32483800  | -4.29253400 | -2.48548800 |
| H | 2.41378400  | -3.86435200 | -1.14712600 |
| H | -4.44673000 | -2.55391200 | 1.47201700  |
| H | -3.05144500 | -3.63446900 | 1.70562400  |
| H | -4.42411800 | -3.28783000 | -0.80860500 |
| H | -2.79432100 | -3.97912300 | -0.62766300 |

93

**(S)-D1**

imaginary frequencies -9.28

E(M06L/LanL2DZ(Pd),6-311G(d,p))=-2799.878945

H(M06L/LanL2DZ(Pd),6-311G(d,p))=-2799.825758

G(M06L/LanL2DZ(Pd),6-311G(d,p))=-2799.970226

E(M06L/def2TZVP)=-2800.34210002

|    |             |             |             |
|----|-------------|-------------|-------------|
| P  | -1.82976600 | -0.21746700 | 0.17557300  |
| Pt | 0.41119200  | -0.00627900 | 0.08571000  |
| C  | -2.49185000 | -0.85357600 | 1.75228100  |
| C  | -3.86141500 | -0.78060500 | 2.04980400  |
| C  | -1.63675200 | -1.42389700 | 2.69219100  |
| C  | -4.35663000 | -1.27903900 | 3.23861100  |
| C  | -2.12114200 | -1.92674600 | 3.89609900  |
| C  | -3.48720200 | -1.85805100 | 4.17168300  |
| C  | -2.81769200 | 1.29780100  | -0.08214000 |
| C  | -2.43730700 | 2.45329800  | 0.61637900  |
| C  | -3.92239500 | 1.36547800  | -0.92664300 |
| C  | -3.14044700 | 3.63239700  | 0.47512400  |
| C  | -4.63931000 | 2.55070100  | -1.08327000 |
| C  | -4.24835200 | 3.68975400  | -0.37950400 |
| O  | -4.06750300 | -2.31180300 | 5.31017900  |
| C  | -2.42768600 | -1.36333600 | -1.10566700 |
| C  | -2.06660100 | -1.10786800 | -2.44028700 |
| C  | -3.19068500 | -2.49345400 | -0.82279700 |
| C  | -2.48030000 | -1.95049700 | -3.45201200 |
| C  | -3.60439700 | -3.35462400 | -1.83716100 |
| C  | -3.25311900 | -3.08105400 | -3.15851900 |
| O  | -4.86669700 | 4.89575300  | -0.46066000 |
| O  | -3.60553100 | -3.84543500 | -4.22346700 |
| C  | -5.97955800 | 4.99671700  | -1.32511000 |
| C  | -3.22276300 | -2.89196900 | 6.28389700  |
| C  | -4.38309600 | -4.99666300 | -3.96859600 |
| B  | 0.08885500  | 1.67878600  | -1.10200800 |
| B  | 2.45695800  | 1.04848000  | 0.96271600  |
| H  | -4.54543500 | -0.32234300 | 1.33991400  |
| H  | -0.57061000 | -1.45513500 | 2.47642100  |
| H  | -5.41273900 | -1.22727300 | 3.47994500  |
| H  | -1.42846200 | -2.35412200 | 4.61092200  |
| H  | -1.56155200 | 2.42085500  | 1.25964800  |
| H  | -4.23362800 | 0.48603000  | -1.48339000 |
| H  | -2.85119100 | 4.53132100  | 1.00886300  |
| H  | -5.48998600 | 2.57288200  | -1.75369400 |
| H  | -1.45572500 | -0.23870200 | -2.67217500 |
| H  | -3.47046100 | -2.71906000 | 0.20170300  |
| H  | -2.21049900 | -1.76367900 | -4.48583800 |
| H  | -4.19528400 | -4.22648800 | -1.58438100 |
| H  | -6.78963200 | 4.32252600  | -1.02255300 |
| H  | -5.70515000 | 4.77880300  | -2.36408500 |

|    |             |             |             |
|----|-------------|-------------|-------------|
| H  | -6.32560700 | 6.02642900  | -1.25478200 |
| H  | -2.48139800 | -2.17466900 | 6.65429100  |
| H  | -2.70171100 | -3.77349600 | 5.89245800  |
| H  | -3.87075700 | -3.19357900 | 7.10493700  |
| H  | -5.34629800 | -4.74167500 | -3.51057400 |
| H  | -3.85650100 | -5.70559200 | -3.31868000 |
| H  | -4.56005400 | -5.46256400 | -4.93639200 |
| O  | 1.99564200  | 1.42538300  | 2.21127300  |
| O  | 3.09336200  | 2.08625300  | 0.30032400  |
| O  | -0.36232900 | 1.72203000  | -2.41561300 |
| O  | 0.33537000  | 2.96397400  | -0.62723400 |
| Si | 3.97649300  | -0.57898500 | -0.84026200 |
| C  | 3.46570300  | 0.41232000  | -2.33886200 |
| H  | 3.29430500  | 1.45474300  | -2.05960000 |
| H  | 4.22427100  | 0.37232000  | -3.12531900 |
| H  | 2.52666100  | 0.02035900  | -2.73956800 |
| C  | 2.58667100  | -0.42249800 | 0.43843000  |
| C  | 1.71266900  | -1.41679700 | 0.81511400  |
| C  | 4.17560500  | -2.33690500 | -1.30660000 |
| C  | 4.28790200  | -3.50224100 | -1.63341500 |
| C  | 5.61362100  | 0.00858600  | -0.12767300 |
| C  | 6.07650900  | 1.31495800  | -0.33478700 |
| C  | 6.39537000  | -0.84330900 | 0.66440900  |
| C  | 7.27048000  | 1.75356000  | 0.22752900  |
| H  | 5.48818200  | 2.00099200  | -0.93789100 |
| C  | 7.58736400  | -0.40880400 | 1.23307800  |
| H  | 6.06674800  | -1.86757500 | 0.83246100  |
| C  | 8.02770500  | 0.89260100  | 1.01520400  |
| H  | 7.61279900  | 2.76903600  | 0.04942800  |
| H  | 8.17636900  | -1.08636600 | 1.84415600  |
| H  | 8.96011400  | 1.23359500  | 1.45506600  |
| C  | 1.94669200  | -2.86247600 | 0.98713000  |
| H  | 1.47508600  | -3.40673400 | 0.15993900  |
| H  | 3.00087700  | -3.15336200 | 1.04292900  |
| H  | 1.43171700  | -3.20963000 | 1.88996300  |
| C  | 4.40077600  | -4.89593200 | -1.99640600 |
| H  | 5.44157300  | -5.23153100 | -1.98065300 |
| H  | 3.83835900  | -5.52994500 | -1.30325300 |
| H  | 4.00970500  | -5.07959500 | -3.00113200 |
| C  | -0.58389400 | 3.08988900  | -2.76959100 |
| C  | 0.16890600  | 3.88403800  | -1.70686900 |
| C  | 3.06326100  | 3.22627400  | 1.15180600  |
| C  | 2.08806000  | 2.84841600  | 2.26928000  |
| H  | 1.15979200  | 4.20945900  | -2.05246000 |



|   |             |            |             |
|---|-------------|------------|-------------|
| H | -0.38141700 | 4.76281800 | -1.35740400 |
| H | -0.22334600 | 3.26951200 | -3.78583500 |
| H | -1.66338500 | 3.28814400 | -2.74101400 |
| H | 2.42984700  | 3.14815600 | 3.26375500  |
| H | 1.09354200  | 3.27448400 | 2.09259700  |
| H | 4.07940300  | 3.41757200 | 1.52149200  |
| H | 2.72833600  | 4.09639200 | 0.57968400  |

93

**(S)-Cplx5**

imaginary frequencies no

E(M06L/LanL2DZ(Pd),6-311G(d,p))=-2799.882815

H(M06L/LanL2DZ(Pd),6-311G(d,p))=-2799.828544

G(M06L/LanL2DZ(Pd),6-311G(d,p))=-2799.975496

E(M06L/def2TZVP)=-2800.34580282

|    |             |             |             |
|----|-------------|-------------|-------------|
| P  | 0.82082500  | 0.71404000  | 0.35708900  |
| Pt | 0.22427600  | -1.37300800 | -0.67304400 |
| C  | 2.53107700  | 1.35041200  | 0.19868200  |
| C  | 3.45490200  | 1.33066300  | 1.24871500  |
| C  | 2.93710500  | 1.87130200  | -1.03168900 |
| C  | 4.73498400  | 1.83143100  | 1.07876300  |
| C  | 4.21742200  | 2.38167300  | -1.21522500 |
| C  | 5.12450700  | 2.36461000  | -0.15290200 |
| C  | -0.13532600 | 2.19752100  | -0.09705800 |
| C  | -1.21461200 | 2.06846200  | -0.97774200 |
| C  | 0.18815000  | 3.47461700  | 0.36997100  |
| C  | -1.97793300 | 3.16115100  | -1.34528100 |
| C  | -0.56971200 | 4.58396600  | 0.01351000  |
| C  | -1.66482500 | 4.42672700  | -0.84301400 |
| O  | 6.39817300  | 2.83289500  | -0.22078200 |
| C  | 0.62692000  | 0.45414000  | 2.15071500  |
| C  | 0.97596500  | -0.81041500 | 2.65466300  |
| C  | 0.14528100  | 1.41317600  | 3.03787400  |
| C  | 0.84827300  | -1.09449700 | 4.00023000  |
| C  | 0.00021900  | 1.13422000  | 4.39396200  |
| C  | 0.35320900  | -0.12524200 | 4.87985200  |
| O  | -2.46736400 | 5.44083500  | -1.25141300 |
| O  | 0.24782700  | -0.50571300 | 6.17808000  |
| C  | -2.17908200 | 6.73729100  | -0.77066100 |
| C  | 6.83241700  | 3.35227100  | -1.46024500 |
| C  | -0.27100600 | 0.43782000  | 7.09215400  |
| B  | 2.23526000  | -1.39575300 | -1.24505700 |
| O  | 2.63709900  | -0.90251600 | -2.47086000 |
| C  | 4.05686300  | -1.01382200 | -2.55020100 |

|    |             |             |             |
|----|-------------|-------------|-------------|
| C  | 4.50880800  | -1.29273300 | -1.11625900 |
| B  | 1.15671400  | -3.21373600 | -0.95194000 |
| O  | 1.36176800  | -4.01377900 | 0.15799600  |
| C  | 2.02953700  | -5.19539400 | -0.28147800 |
| O  | 3.32067600  | -1.70396500 | -0.43619200 |
| O  | 1.45291300  | -3.88150200 | -2.12802700 |
| C  | 1.79373900  | -5.22831400 | -1.79022100 |
| H  | 3.17038700  | 0.92071100  | 2.21310200  |
| H  | 2.24256800  | 1.87885600  | -1.86794000 |
| H  | 5.45556500  | 1.82177500  | 1.88948300  |
| H  | 4.49442700  | 2.78619600  | -2.18164000 |
| H  | -1.44939000 | 1.08762300  | -1.38197500 |
| H  | 1.05389700  | 3.61296000  | 1.01349200  |
| H  | -2.82136700 | 3.05373500  | -2.02009800 |
| H  | -0.29694300 | 5.56021900  | 0.39632100  |
| H  | 1.34069100  | -1.57567500 | 1.97201900  |
| H  | -0.15461900 | 2.39106000  | 2.67384500  |
| H  | 1.11140200  | -2.06884300 | 4.39696700  |
| H  | -0.39561500 | 1.89624900  | 5.05436300  |
| H  | -1.18185200 | 7.07234200  | -1.08019900 |
| H  | -2.24948000 | 6.78948300  | 0.32220600  |
| H  | -2.92809000 | 7.39497700  | -1.20824200 |
| H  | 6.24035700  | 4.22294000  | -1.76593700 |
| H  | 6.78807800  | 2.59611100  | -2.25352400 |
| H  | 7.86742800  | 3.65717500  | -1.31511200 |
| H  | -1.29242900 | 0.73660900  | 6.82858800  |
| H  | 0.35875600  | 1.33339000  | 7.15162900  |
| H  | -0.28194100 | -0.05551900 | 8.06264400  |
| C  | -1.52794100 | -2.49062200 | -0.94285800 |
| C  | -1.93771000 | -1.38683000 | -0.43588800 |
| H  | 4.47312700  | -0.08545800 | -2.95497200 |
| H  | 4.30692000  | -1.83264600 | -3.23686300 |
| H  | 5.25975500  | -2.08502900 | -1.04529800 |
| H  | 4.90408700  | -0.39742300 | -0.62206600 |
| H  | 2.67325500  | -5.53507100 | -2.36215000 |
| H  | 3.09515800  | -5.11039800 | -0.03148700 |
| H  | 0.95916600  | -5.88443500 | -2.06922100 |
| H  | 1.62167300  | -6.06471600 | 0.24183300  |
| C  | -1.84261400 | -3.84901700 | -1.40078900 |
| H  | -1.35043100 | -4.59031700 | -0.76246000 |
| H  | -2.92171100 | -4.02803500 | -1.36938100 |
| H  | -1.48153000 | -4.01797400 | -2.41917300 |
| Si | -3.40607800 | -0.55797100 | 0.27285600  |
| C  | -2.99005600 | 0.45445700  | 1.78853600  |

|   |             |             |             |
|---|-------------|-------------|-------------|
| H | -2.40177800 | 1.33789000  | 1.52284900  |
| H | -3.89817300 | 0.79212700  | 2.29590400  |
| H | -2.40826100 | -0.13571800 | 2.50171800  |
| C | -4.61512400 | -1.85171100 | 0.73969100  |
| C | -5.41490400 | -2.72132100 | 1.02744100  |
| C | -4.21298900 | 0.54712000  | -1.02484600 |
| C | -3.95396900 | 0.38595500  | -2.39146700 |
| C | -5.09231600 | 1.56819800  | -0.64227000 |
| C | -4.54788400 | 1.21318700  | -3.34000000 |
| H | -3.26327800 | -0.39119500 | -2.71426100 |
| C | -5.68948800 | 2.39867600  | -1.58438800 |
| H | -5.31238800 | 1.72453000  | 0.41184300  |
| C | -5.41766000 | 2.22199300  | -2.93741300 |
| H | -4.32909200 | 1.07343600  | -4.39459800 |
| H | -6.36334700 | 3.18784500  | -1.26409600 |
| H | -5.87906800 | 2.87115600  | -3.67545200 |
| C | -6.36495500 | -3.75349200 | 1.37532100  |
| H | -7.08203900 | -3.40020400 | 2.12190800  |
| H | -6.93525800 | -4.08088100 | 0.50126200  |
| H | -5.86363500 | -4.63262400 | 1.79074100  |

93

**(S)-TSC1D2**

imaginary frequencies -134.15

E(M06L/LanL2DZ(Pd),6-311G(d,p))=-2799.864095

H(M06L/LanL2DZ(Pd),6-311G(d,p))=-2799.810414

G(M06L/LanL2DZ(Pd),6-311G(d,p))=-2799.956745

E(M06L/def2TZVP)=-2800.32912352

|    |             |             |             |
|----|-------------|-------------|-------------|
| P  | 1.01352500  | 0.71247200  | 0.32595100  |
| Pt | 0.01064400  | -1.10494400 | -0.61033400 |
| C  | 2.80961500  | 0.90585400  | 0.07455000  |
| C  | 3.74232400  | 0.80717900  | 1.11164200  |
| C  | 3.27618500  | 1.10908900  | -1.22551400 |
| C  | 5.09906600  | 0.91816700  | 0.85736900  |
| C  | 4.63378200  | 1.22795300  | -1.49394800 |
| C  | 5.55381800  | 1.13139400  | -0.44646300 |
| C  | 0.36425300  | 2.34818900  | -0.14620100 |
| C  | -0.91536800 | 2.43848800  | -0.70577200 |
| C  | 1.09044900  | 3.52470300  | 0.04524600  |
| C  | -1.46693900 | 3.65989400  | -1.04115900 |
| C  | 0.55135400  | 4.76259900  | -0.28786500 |
| C  | -0.73577400 | 4.83342200  | -0.82937400 |
| O  | 6.90026800  | 1.22379000  | -0.59702700 |
| C  | 0.80658100  | 0.59143200  | 2.13145400  |

|   |             |             |             |
|---|-------------|-------------|-------------|
| C | 0.83735100  | -0.68135900 | 2.72539900  |
| C | 0.59535400  | 1.70278300  | 2.94335900  |
| C | 0.67251700  | -0.82503400 | 4.08872100  |
| C | 0.41483000  | 1.56841900  | 4.31706000  |
| C | 0.45588900  | 0.29890300  | 4.89517700  |
| O | -1.35211500 | 5.98690100  | -1.18816400 |
| O | 0.29014200  | 0.05074900  | 6.21846100  |
| C | -0.64254100 | 7.19341700  | -0.99803700 |
| C | 7.39429900  | 1.41906300  | -1.90587000 |
| C | 0.05472600  | 1.15839400  | 7.06305100  |
| B | 1.86807100  | -1.72963000 | -1.29252200 |
| O | 2.37421900  | -1.57258700 | -2.56979700 |
| C | 3.60571000  | -2.28777200 | -2.65897200 |
| C | 3.96898300  | -2.62892200 | -1.21294100 |
| B | -0.14067200 | -3.24423500 | -0.52889300 |
| O | 0.03764800  | -3.78986600 | 0.73082000  |
| C | 0.83169900  | -4.96541900 | 0.57071400  |
| O | 2.76343400  | -2.41745300 | -0.47751900 |
| O | 0.26271200  | -4.10734300 | -1.53544100 |
| C | 0.71988800  | -5.30784800 | -0.91730400 |
| H | 3.40452100  | 0.63709400  | 2.12974300  |
| H | 2.56966400  | 1.15679500  | -2.04988800 |
| H | 5.83091000  | 0.83999800  | 1.65392500  |
| H | 4.96275800  | 1.38687800  | -2.51403800 |
| H | -1.47560900 | 1.52636200  | -0.88904200 |
| H | 2.09640200  | 3.47938000  | 0.45539100  |
| H | -2.45873900 | 3.72659400  | -1.47669000 |
| H | 1.13991500  | 5.65827400  | -0.12883600 |
| H | 0.96922100  | -1.56166300 | 2.09926400  |
| H | 0.54819500  | 2.69560600  | 2.50512100  |
| H | 0.68869400  | -1.80298500 | 4.55735900  |
| H | 0.23697600  | 2.45167400  | 4.91846000  |
| H | 0.28393500  | 7.21463900  | -1.58381500 |
| H | -0.40057700 | 7.35842900  | 0.05860000  |
| H | -1.30133200 | 7.98886600  | -1.34206300 |
| H | 7.02909200  | 2.35665400  | -2.34130800 |
| H | 7.12101100  | 0.58927000  | -2.56921900 |
| H | 8.47829400  | 1.46400600  | -1.81719600 |
| H | -0.86550900 | 1.68749100  | 6.78838300  |
| H | 0.89210200  | 1.86601000  | 7.04436900  |
| H | -0.05053800 | 0.75505400  | 8.06865200  |
| C | -1.75335700 | -2.40544000 | -0.73036900 |
| C | -2.10021800 | -1.24274000 | -0.22091000 |
| H | 4.35666800  | -1.66200800 | -3.15304600 |

|    |             |             |             |
|----|-------------|-------------|-------------|
| H  | 3.45028700  | -3.18368500 | -3.27322100 |
| H  | 4.29825800  | -3.66570500 | -1.08548800 |
| H  | 4.75003300  | -1.97069100 | -0.81149600 |
| H  | 1.67642400  | -5.60123400 | -1.36112800 |
| H  | 1.86241000  | -4.73195300 | 0.86037800  |
| H  | -0.00599500 | -6.10852400 | -1.11154500 |
| H  | 0.44975800  | -5.75243100 | 1.22674800  |
| C  | -2.55930100 | -3.49227900 | -1.39050900 |
| H  | -2.43645700 | -4.45820000 | -0.88985700 |
| H  | -3.61684500 | -3.21837400 | -1.36103500 |
| H  | -2.24307000 | -3.62944500 | -2.42761600 |
| Si | -3.58996500 | -0.31355500 | 0.29310900  |
| C  | -3.20278400 | 0.69295200  | 1.82261000  |
| H  | -2.41736800 | 1.42466900  | 1.60815200  |
| H  | -4.08135400 | 1.23162900  | 2.18822900  |
| H  | -2.84363200 | 0.05065800  | 2.63147200  |
| C  | -5.00461900 | -1.42364500 | 0.64502800  |
| C  | -5.92347900 | -2.19188400 | 0.85736300  |
| C  | -4.07716900 | 0.83090900  | -1.12511800 |
| C  | -3.56360900 | 0.64812100  | -2.41574700 |
| C  | -4.95894100 | 1.89999500  | -0.91699800 |
| C  | -3.91267300 | 1.50100800  | -3.45786500 |
| H  | -2.86353300 | -0.16523200 | -2.60004300 |
| C  | -5.31525900 | 2.75361600  | -1.95554900 |
| H  | -5.37747900 | 2.06991000  | 0.07299200  |
| C  | -4.78973600 | 2.55613000  | -3.22896000 |
| H  | -3.49627500 | 1.34486200  | -4.44840200 |
| H  | -6.00004000 | 3.57647400  | -1.77203100 |
| H  | -5.06235800 | 3.22468300  | -4.04004500 |
| C  | -7.01735400 | -3.10135100 | 1.11273300  |
| H  | -7.80327000 | -2.62384100 | 1.70508700  |
| H  | -7.47313900 | -3.44770300 | 0.18058800  |
| H  | -6.68079300 | -3.98444500 | 1.66360200  |

93

**(S)-D2**

imaginary frequencies no

E(M06L/LanL2DZ(Pd),6-311G(d,p))=-2799.876029

H(M06L/LanL2DZ(Pd),6-311G(d,p))=-2799.821906

G(M06L/LanL2DZ(Pd),6-311G(d,p))=-2799.969526

E(M06L/def2TZVP)=-2800.33813348

|    |             |             |             |
|----|-------------|-------------|-------------|
| P  | 1.04504900  | 0.48405900  | 0.41749700  |
| Pt | -0.56716700 | -0.86838100 | -0.30165200 |

|   |             |             |             |
|---|-------------|-------------|-------------|
| C | 2.65276000  | -0.32783000 | 0.69541500  |
| C | 3.03442800  | -0.80970500 | 1.95337400  |
| C | 3.50138700  | -0.56270600 | -0.38752700 |
| C | 4.22107200  | -1.50127600 | 2.11926400  |
| C | 4.69781500  | -1.25086500 | -0.23569500 |
| C | 5.06091500  | -1.72966800 | 1.02608500  |
| C | 1.41836200  | 1.92445100  | -0.61593400 |
| C | 0.45862700  | 2.39451400  | -1.52333300 |
| C | 2.62860000  | 2.60837600  | -0.50183000 |
| C | 0.70719100  | 3.51989100  | -2.28472100 |
| C | 2.89258500  | 3.73839900  | -1.26800000 |
| C | 1.92469000  | 4.19808000  | -2.16427400 |
| O | 6.20236900  | -2.41347100 | 1.28927300  |
| C | 0.58507800  | 1.14432600  | 2.05944300  |
| C | -0.05624500 | 0.28914800  | 2.97095000  |
| C | 0.83967000  | 2.45904500  | 2.44371800  |
| C | -0.39811100 | 0.73135700  | 4.23250400  |
| C | 0.47622100  | 2.92284800  | 3.70550200  |
| C | -0.13708000 | 2.05479500  | 4.60916200  |
| O | 2.07592500  | 5.28455400  | -2.96222900 |
| O | -0.52454200 | 2.39722700  | 5.86255000  |
| C | 3.29745900  | 5.98925500  | -2.87944000 |
| C | 7.07499900  | -2.66653100 | 0.20716000  |
| C | -0.29501700 | 3.72951700  | 6.27334800  |
| B | 0.68800200  | -1.21336000 | -1.91111000 |
| O | 0.76238800  | -0.46936700 | -3.07502000 |
| C | 1.54610500  | -1.18983800 | -4.02822100 |
| C | 2.15243400  | -2.35932000 | -3.24318500 |
| B | -0.96150500 | -3.34736700 | 0.29103400  |
| O | -0.18034200 | -3.27899100 | 1.43288000  |
| C | 1.02584300  | -3.98271600 | 1.12256600  |
| O | 1.47308300  | -2.35548800 | -1.98849000 |
| O | -0.53497500 | -4.32188700 | -0.58447600 |
| C | 0.64621000  | -4.90451800 | -0.03777700 |
| H | 2.39661200  | -0.64216200 | 2.81578500  |
| H | 3.23134800  | -0.18783200 | -1.37228900 |
| H | 4.52417900  | -1.87543000 | 3.09091200  |
| H | 5.33543200  | -1.40794800 | -1.09767700 |
| H | -0.47991300 | 1.85644300  | -1.64204600 |
| H | 3.38660700  | 2.25286800  | 0.19158900  |
| H | -0.02637600 | 3.88855100  | -2.99290000 |
| H | 3.84392400  | 4.24561100  | -1.16302100 |
| H | -0.30713000 | -0.72533200 | 2.66516500  |
| H | 1.31628200  | 3.14719400  | 1.75219900  |

|    |             |             |             |
|----|-------------|-------------|-------------|
| H  | -0.89270800 | 0.07834800  | 4.94342100  |
| H  | 0.67406800  | 3.95491300  | 3.96837200  |
| H  | 4.14948100  | 5.35349800  | -3.14781400 |
| H  | 3.46121300  | 6.39933700  | -1.87582200 |
| H  | 3.22329500  | 6.80823500  | -3.59265800 |
| H  | 7.44486100  | -1.73659300 | -0.24070300 |
| H  | 6.59130600  | -3.26973900 | -0.57008700 |
| H  | 7.91479200  | -3.22256800 | 0.62004700  |
| H  | -0.83602600 | 4.44509000  | 5.64316300  |
| H  | 0.77267000  | 3.97814300  | 6.25989600  |
| H  | -0.66630400 | 3.79929100  | 7.29427900  |
| C  | -2.27409800 | -2.53833800 | 0.00154000  |
| C  | -2.42360300 | -1.25257800 | 0.46744900  |
| H  | 2.30085900  | -0.52057700 | -4.45304500 |
| H  | 0.89633800  | -1.52572800 | -4.84441100 |
| H  | 2.00491500  | -3.32668000 | -3.73290600 |
| H  | 3.22891900  | -2.23296300 | -3.06562300 |
| H  | 1.41773500  | -4.94675200 | -0.81061400 |
| H  | 1.79082400  | -3.25437800 | 0.82082300  |
| H  | 0.41922600  | -5.92690900 | 0.29034200  |
| H  | 1.37615900  | -4.51467900 | 2.01117500  |
| C  | -3.29041300 | -3.24197700 | -0.87281000 |
| H  | -3.64481300 | -4.16204400 | -0.39360400 |
| H  | -4.15617000 | -2.61168200 | -1.08785000 |
| H  | -2.82952300 | -3.55214100 | -1.81634900 |
| Si | -3.74612300 | 0.03258800  | 0.44248700  |
| C  | -3.62075600 | 1.04928600  | 2.00989900  |
| H  | -2.64630900 | 1.54614300  | 2.05649600  |
| H  | -4.40437600 | 1.80975500  | 2.06607100  |
| H  | -3.71110400 | 0.41638300  | 2.89647200  |
| C  | -5.46578000 | -0.59076300 | 0.28122100  |
| C  | -6.58141200 | -1.06331500 | 0.16925600  |
| C  | -3.35602900 | 1.14329300  | -1.03884300 |
| C  | -2.96182200 | 0.59167900  | -2.26724300 |
| C  | -3.42968800 | 2.53865000  | -0.94869200 |
| C  | -2.66291300 | 1.39600100  | -3.36081100 |
| H  | -2.87373300 | -0.48848500 | -2.36766400 |
| C  | -3.13374400 | 3.35159000  | -2.04007200 |
| H  | -3.71925100 | 3.00378600  | -0.00907400 |
| C  | -2.75373000 | 2.78071100  | -3.24957800 |
| H  | -2.34771900 | 0.94327500  | -4.29605400 |
| H  | -3.19541700 | 4.43191700  | -1.94449900 |
| H  | -2.52206900 | 3.41234100  | -4.10247700 |
| C  | -7.90787400 | -1.62179600 | 0.03574500  |

|   |             |             |             |
|---|-------------|-------------|-------------|
| H | -8.67853500 | -0.89217900 | 0.30159700  |
| H | -8.10216200 | -1.94519300 | -0.99120000 |
| H | -8.04098100 | -2.49232000 | 0.68494000  |

93

**(S)-TSD1E1**

imaginary frequencies -60.69

E(M06L/LanL2DZ(Pd),6-311G(d,p))=-2799.866736

H(M06L/LanL2DZ(Pd),6-311G(d,p))=-2799.813386

G(M06L/LanL2DZ(Pd),6-311G(d,p))=-2799.958976

E(M06L/def2TZVP)=-2800.32956139

|    |             |             |             |
|----|-------------|-------------|-------------|
| P  | -1.75950000 | 0.37781300  | -0.05040400 |
| Pt | 0.12021900  | -0.54626900 | 0.58208300  |
| C  | -1.57770300 | 1.65026000  | -1.34024600 |
| C  | -2.68493700 | 2.42145400  | -1.72913700 |
| C  | -0.37398500 | 1.82042300  | -2.01954800 |
| C  | -2.57701500 | 3.35666200  | -2.73859600 |
| C  | -0.25522600 | 2.75206600  | -3.04611600 |
| C  | -1.35645200 | 3.52985100  | -3.40411200 |
| C  | -2.99686700 | -0.74529300 | -0.78011700 |
| C  | -2.55359300 | -1.71238500 | -1.69422500 |
| C  | -4.36106700 | -0.64593800 | -0.52373500 |
| C  | -3.44814000 | -2.55215600 | -2.32587900 |
| C  | -5.27465600 | -1.49218800 | -1.14898700 |
| C  | -4.81875200 | -2.44850100 | -2.05601800 |
| O  | -1.34927400 | 4.47155600  | -4.37865500 |
| C  | -2.58021800 | 1.16745500  | 1.35658600  |
| C  | -3.11326100 | 0.34069400  | 2.36118400  |
| C  | -2.58257800 | 2.54740200  | 1.54814800  |
| C  | -3.66494700 | 0.89126100  | 3.49940500  |
| C  | -3.13076400 | 3.11021600  | 2.69685000  |
| C  | -3.68021400 | 2.28082800  | 3.67540900  |
| O  | -5.61630700 | -3.32274200 | -2.71929600 |
| O  | -4.24081300 | 2.72087400  | 4.82852700  |
| C  | -7.00721700 | -3.24063400 | -2.48405800 |
| C  | -0.13694800 | 4.67220600  | -5.07870700 |
| C  | -4.24639400 | 4.11529800  | 5.05885400  |
| B  | -0.83597100 | -2.42204300 | 0.76346200  |
| B  | 2.57466900  | -1.05779600 | -0.23842200 |
| H  | -3.64163100 | 2.28819000  | -1.22962600 |
| H  | 0.48598000  | 1.21889100  | -1.73463900 |
| H  | -3.42212900 | 3.96536400  | -3.04025400 |
| H  | 0.69567700  | 2.86103600  | -3.55311200 |
| H  | -1.48777500 | -1.81206300 | -1.88749200 |



|    |             |             |             |
|----|-------------|-------------|-------------|
| H  | -4.73045400 | 0.09401500  | 0.17995000  |
| H  | -3.11518400 | -3.30385200 | -3.03335300 |
| H  | -6.32930100 | -1.39687000 | -0.92058200 |
| H  | -3.06239700 | -0.73936400 | 2.24300200  |
| H  | -2.14562600 | 3.20130700  | 0.79921900  |
| H  | -4.08000000 | 0.26755000  | 4.28356400  |
| H  | -3.12023100 | 4.18645700  | 2.81771900  |
| H  | -7.40655100 | -2.25884600 | -2.76457700 |
| H  | -7.25243700 | -3.43843700 | -1.43394100 |
| H  | -7.46540600 | -4.00542500 | -3.10865400 |
| H  | 0.17848300  | 3.76505800  | -5.60658200 |
| H  | 0.66771600  | 4.99230300  | -4.40680300 |
| H  | -0.33414200 | 5.45955000  | -5.80391900 |
| H  | -4.82184500 | 4.64894400  | 4.29332100  |
| H  | -3.22919800 | 4.52268200  | 5.08961500  |
| H  | -4.71996000 | 4.25972400  | 6.02813900  |
| O  | 2.63114500  | -1.35191500 | -1.57826200 |
| O  | 2.54404500  | -2.18772700 | 0.56102700  |
| O  | -1.97190800 | -2.66503000 | 1.53609900  |
| O  | -0.46885200 | -3.58215300 | 0.08306800  |
| Si | 4.36122000  | 0.92428400  | 0.90073600  |
| C  | 4.43268900  | 1.31270700  | 2.73194600  |
| H  | 4.06187700  | 0.46832300  | 3.31995800  |
| H  | 5.45208600  | 1.53746400  | 3.05798600  |
| H  | 3.80607400  | 2.17524800  | 2.97068800  |
| C  | 2.63792100  | 0.37695100  | 0.37104200  |
| C  | 1.48191900  | 1.05067200  | 0.60228800  |
| C  | 4.89905500  | 2.39035100  | -0.05394400 |
| C  | 5.23334000  | 3.36640200  | -0.69771900 |
| C  | 5.51279300  | -0.51237600 | 0.50232100  |
| C  | 5.96513700  | -1.38388100 | 1.50104100  |
| C  | 5.84791200  | -0.81464000 | -0.82599000 |
| C  | 6.72539400  | -2.50731600 | 1.19177000  |
| H  | 5.71734900  | -1.18721200 | 2.54150400  |
| C  | 6.60480000  | -1.93754000 | -1.14253300 |
| H  | 5.50368300  | -0.16196800 | -1.62560900 |
| C  | 7.04629800  | -2.78678800 | -0.13227500 |
| H  | 7.06735200  | -3.16615500 | 1.98462900  |
| H  | 6.85420900  | -2.14934100 | -2.17827600 |
| H  | 7.63958000  | -3.66284200 | -0.37644300 |
| C  | 1.37273300  | 2.46405300  | 1.05666700  |
| H  | 0.88459200  | 2.52193300  | 2.03688000  |
| H  | 2.33332500  | 2.99504700  | 1.11137200  |
| H  | 0.72631300  | 3.02734400  | 0.37138500  |

|   |             |             |             |
|---|-------------|-------------|-------------|
| C | 5.64035500  | 4.52781400  | -1.45537900 |
| H | 6.69142800  | 4.46278000  | -1.75139500 |
| H | 5.04730700  | 4.63834100  | -2.36812800 |
| H | 5.51973100  | 5.44512800  | -0.87164500 |
| C | -2.46168800 | -3.97650900 | 1.25585500  |
| C | -1.33720200 | -4.65083600 | 0.47073700  |
| C | 2.71017500  | -3.32367200 | -0.29887200 |
| C | 2.48257900  | -2.77140400 | -1.70646400 |
| H | -0.77281800 | -5.36869700 | 1.07902800  |
| H | -1.69301900 | -5.17168500 | -0.42395100 |
| H | -2.69946000 | -4.48865500 | 2.19302900  |
| H | -3.38566700 | -3.88990700 | 0.66948000  |
| H | 3.20605500  | -3.14165700 | -2.43806700 |
| H | 1.46873800  | -2.98510900 | -2.06447100 |
| H | 3.72715000  | -3.70813900 | -0.15494800 |
| H | 1.98145300  | -4.08612200 | -0.02064600 |

93

**(S)-E1**

imaginary frequencies no

E(M06L/LanL2DZ(Pd),6-311G(d,p))=-2799.884337

H(M06L/LanL2DZ(Pd),6-311G(d,p))=-2799.830968

G(M06L/LanL2DZ(Pd),6-311G(d,p))=-2799.97577

E(M06L/def2TZVP)=-2800.34755056

|    |             |             |             |
|----|-------------|-------------|-------------|
| P  | -1.68680200 | 0.36374800  | -0.01657400 |
| Pt | -0.08803600 | -1.07054700 | 0.45798300  |
| C  | -1.21273800 | 1.57318200  | -1.29757300 |
| C  | -2.15826300 | 2.48368200  | -1.79632400 |
| C  | 0.06302300  | 1.56644200  | -1.85977100 |
| C  | -1.83018100 | 3.36672200  | -2.80519400 |
| C  | 0.40445600  | 2.44409700  | -2.88346500 |
| C  | -0.54440000 | 3.34912500  | -3.36087000 |
| C  | -3.24818300 | -0.28740800 | -0.71143700 |
| C  | -3.17179700 | -1.11647200 | -1.84076100 |
| C  | -4.50248400 | 0.01385300  | -0.19295100 |
| C  | -4.31288700 | -1.62771100 | -2.42466900 |
| C  | -5.66402800 | -0.49932200 | -0.76941100 |
| C  | -5.57180700 | -1.32324100 | -1.88980100 |
| O  | -0.32765500 | 4.24080600  | -4.35844000 |
| C  | -2.19976800 | 1.29047200  | 1.45763700  |
| C  | -2.58062700 | 0.53227400  | 2.57764200  |
| C  | -2.15098800 | 2.67624100  | 1.56974600  |
| C  | -2.91615900 | 1.15098300  | 3.76401700  |
| C  | -2.47686200 | 3.31076600  | 2.76627000  |

|    |             |             |             |
|----|-------------|-------------|-------------|
| C  | -2.86125000 | 2.54728700  | 3.86840900  |
| O  | -6.63234900 | -1.88186200 | -2.52661300 |
| O  | -3.19475400 | 3.05863000  | 5.07904400  |
| C  | -7.91837300 | -1.59933500 | -2.01366800 |
| C  | 0.93555800  | 4.21473200  | -4.99391700 |
| C  | -3.12056000 | 4.46144200  | 5.23491000  |
| B  | -1.48399200 | -2.61349400 | 0.22514400  |
| B  | 2.84029700  | -1.70431300 | 0.48122300  |
| H  | -3.16922300 | 2.48806500  | -1.39535500 |
| H  | 0.80369400  | 0.86152700  | -1.49007900 |
| H  | -2.55339000 | 4.07206600  | -3.19896600 |
| H  | 1.40487700  | 2.40779100  | -3.29888500 |
| H  | -2.19789300 | -1.37686100 | -2.24884800 |
| H  | -4.59069500 | 0.65258600  | 0.68086200  |
| H  | -4.26266500 | -2.27022200 | -3.29718100 |
| H  | -6.62521000 | -0.25120300 | -0.33541600 |
| H  | -2.60026700 | -0.55322300 | 2.50136100  |
| H  | -1.83480100 | 3.28061900  | 0.72467700  |
| H  | -3.20976000 | 0.57898800  | 4.63705000  |
| H  | -2.41870000 | 4.39052600  | 2.82900300  |
| H  | -8.13978900 | -0.52612600 | -2.04761900 |
| H  | -8.02857700 | -1.95308000 | -0.98168400 |
| H  | -8.62243700 | -2.13035600 | -2.65192200 |
| H  | 1.13798900  | 3.23824200  | -5.44843500 |
| H  | 1.74427600  | 4.45744100  | -4.29568200 |
| H  | 0.89657500  | 4.97335400  | -5.77354800 |
| H  | -3.80733500 | 4.98069800  | 4.55609900  |
| H  | -2.10299700 | 4.83240800  | 5.06586500  |
| H  | -3.41068600 | 4.66705600  | 6.26361400  |
| O  | 3.83196600  | -2.54724700 | 0.06536700  |
| O  | 1.64470200  | -2.44203600 | 0.70350400  |
| O  | -2.59579600 | -2.76927100 | 1.04602000  |
| O  | -1.42442100 | -3.63418400 | -0.71705600 |
| Si | 4.37487600  | 0.81902400  | 0.84762700  |
| C  | 4.78551400  | 1.41858800  | 2.57941700  |
| H  | 4.87299800  | 0.57507800  | 3.27069500  |
| H  | 5.73095500  | 1.96813600  | 2.59826000  |
| H  | 4.00504500  | 2.07495600  | 2.97111900  |
| C  | 2.81012500  | -0.20875000 | 0.74847900  |
| C  | 1.54002200  | 0.30582800  | 0.88693900  |
| C  | 4.17748800  | 2.27138600  | -0.26350200 |
| C  | 3.96603500  | 3.21367100  | -1.00240000 |
| C  | 5.82330700  | -0.18898600 | 0.19625200  |
| C  | 6.67255200  | -0.88629100 | 1.06343600  |

|   |             |             |             |
|---|-------------|-------------|-------------|
| C | 6.02229800  | -0.35336200 | -1.18043800 |
| C | 7.67158300  | -1.72422800 | 0.57958600  |
| H | 6.55098000  | -0.78102000 | 2.13955700  |
| C | 7.01712500  | -1.18924800 | -1.67209400 |
| H | 5.38124000  | 0.18207300  | -1.87838000 |
| C | 7.84240700  | -1.88142900 | -0.79136400 |
| H | 8.31805700  | -2.25596900 | 1.27203100  |
| H | 7.15096800  | -1.30296900 | -2.74413000 |
| H | 8.61984800  | -2.53702400 | -1.17251600 |
| C | 1.30416400  | 1.71277000  | 1.33463800  |
| H | 0.72552200  | 1.68922400  | 2.26771600  |
| H | 2.20412500  | 2.31617300  | 1.50722700  |
| H | 0.67555900  | 2.26338900  | 0.62388100  |
| C | 3.71406600  | 4.34620500  | -1.86502400 |
| H | 4.02202000  | 4.14042400  | -2.89553400 |
| H | 2.64944800  | 4.60413700  | -1.88018900 |
| H | 4.26295900  | 5.23272600  | -1.53393000 |
| C | -3.39859100 | -3.83687200 | 0.54044300  |
| C | -2.52014500 | -4.52878200 | -0.50392200 |
| C | 1.81511700  | -3.75256400 | 0.13977600  |
| C | 3.33454900  | -3.88628400 | 0.06865700  |
| H | -2.13208200 | -5.49417300 | -0.15673700 |
| H | -3.03968000 | -4.69381500 | -1.45332100 |
| H | -3.69047300 | -4.49672500 | 1.36286900  |
| H | -4.31015700 | -3.41227200 | 0.10139800  |
| H | 3.74603500  | -4.41332300 | 0.93736800  |
| H | 3.67393500  | -4.39851200 | -0.83442300 |
| H | 1.33213700  | -4.48633700 | 0.78817000  |
| H | 1.32724200  | -3.78083200 | -0.83949800 |

93

**(S)-F1**

imaginary frequencies no

E(M06L/LanL2DZ(Pd),6-311G(d,p))=-2799.913467

H(M06L/LanL2DZ(Pd),6-311G(d,p))=-2799.85984

G(M06L/LanL2DZ(Pd),6-311G(d,p))=-2800.006522

E(M06L/def2TZVP)=-2800.37198918

|    |             |             |             |
|----|-------------|-------------|-------------|
| P  | -1.97483200 | 0.36938800  | -0.02342800 |
| Pt | 0.08844800  | -0.74254100 | -0.34689400 |
| C  | -2.25077800 | 1.86731100  | -1.02185500 |
| C  | -3.51597800 | 2.46134300  | -1.14518400 |
| C  | -1.17344400 | 2.45247000  | -1.68654100 |
| C  | -3.68994700 | 3.61095500  | -1.89026500 |
| C  | -1.33371900 | 3.61255300  | -2.43856600 |

|   |             |             |             |
|---|-------------|-------------|-------------|
| C | -2.59673700 | 4.19797100  | -2.54001600 |
| C | -3.49438700 | -0.60022000 | -0.30380300 |
| C | -3.62341200 | -1.25877100 | -1.53688700 |
| C | -4.51210500 | -0.74154100 | 0.63506400  |
| C | -4.74134500 | -2.01761300 | -1.82262800 |
| C | -5.64171000 | -1.51123400 | 0.36270300  |
| C | -5.76139700 | -2.14894700 | -0.87253200 |
| O | -2.86977300 | 5.32238200  | -3.24545400 |
| C | -2.07708000 | 0.92158700  | 1.70914200  |
| C | -1.76560400 | -0.02538400 | 2.70212500  |
| C | -2.33152200 | 2.23442800  | 2.09756900  |
| C | -1.72936200 | 0.33532000  | 4.03397700  |
| C | -2.28357600 | 2.61266300  | 3.43838500  |
| C | -1.98346200 | 1.66028100  | 4.41249500  |
| O | -6.81623300 | -2.91790400 | -1.24419400 |
| O | -1.90666200 | 1.91611300  | 5.74242700  |
| C | -7.86425400 | -3.07782200 | -0.31017300 |
| C | -1.79821400 | 5.93473800  | -3.93590100 |
| C | -2.14096700 | 3.24407600  | 6.16409500  |
| B | -0.89001300 | -2.46783600 | -0.45483300 |
| B | 2.72834100  | 0.61664300  | 0.18907800  |
| H | -4.37332500 | 2.00810600  | -0.65330100 |
| H | -0.19321700 | 1.98579700  | -1.62366300 |
| H | -4.66365400 | 4.07649300  | -1.99638600 |
| H | -0.47852600 | 4.03836600  | -2.94937000 |
| H | -2.82485600 | -1.18479000 | -2.27088600 |
| H | -4.42969900 | -0.25071900 | 1.60080800  |
| H | -4.85070500 | -2.52673900 | -2.77424500 |
| H | -6.41487200 | -1.60376900 | 1.11589100  |
| H | -1.54136100 | -1.04961200 | 2.41010200  |
| H | -2.55611700 | 2.98858300  | 1.34866500  |
| H | -1.49086500 | -0.38612100 | 4.80789100  |
| H | -2.48057500 | 3.64372100  | 3.70627000  |
| H | -8.32812200 | -2.11778500 | -0.05461500 |
| H | -7.51575300 | -3.56136300 | 0.61019600  |
| H | -8.60386300 | -3.71525800 | -0.79139400 |
| H | -1.36175100 | 5.26098700  | -4.68187300 |
| H | -1.01076500 | 6.26432700  | -3.24814800 |
| H | -2.22036200 | 6.80241500  | -4.43961100 |
| H | -3.15317600 | 3.57767100  | 5.90657700  |
| H | -1.41471600 | 3.94024600  | 5.72815700  |
| H | -2.02968700 | 3.24182400  | 7.24678400  |
| O | 3.50885100  | 1.40000300  | 0.99804600  |
| O | 1.46480300  | 1.21362300  | -0.00577500 |

|    |             |             |             |
|----|-------------|-------------|-------------|
| O  | -1.08365000 | -3.23236800 | -1.59116000 |
| O  | -1.52209100 | -3.02104900 | 0.65073300  |
| Si | 4.81041500  | -1.25360800 | -0.73343200 |
| C  | 5.02830900  | -1.90071200 | -2.48538600 |
| H  | 4.66862200  | -1.16225400 | -3.20804600 |
| H  | 6.08589000  | -2.08231200 | -2.69560800 |
| H  | 4.48469100  | -2.82900400 | -2.66923100 |
| C  | 3.03310900  | -0.76325700 | -0.38302000 |
| C  | 1.95001400  | -1.58403000 | -0.57912700 |
| C  | 5.44565000  | -2.49957800 | 0.44931500  |
| C  | 5.83234400  | -3.32941500 | 1.24957100  |
| C  | 5.87396700  | 0.29492100  | -0.59069500 |
| C  | 5.66402300  | 1.34698300  | -1.49337900 |
| C  | 6.83532500  | 0.47760900  | 0.40768700  |
| C  | 6.37639000  | 2.53629900  | -1.39982900 |
| H  | 4.91990900  | 1.24086400  | -2.28215700 |
| C  | 7.55315400  | 1.66532200  | 0.50833300  |
| H  | 7.01658200  | -0.32199900 | 1.12243200  |
| C  | 7.32420900  | 2.69846200  | -0.39377100 |
| H  | 6.19685000  | 3.33669500  | -2.11225600 |
| H  | 8.29362300  | 1.78661400  | 1.29372600  |
| H  | 7.88498500  | 3.62535300  | -0.31633300 |
| C  | 6.28821300  | -4.31891700 | 2.19942300  |
| H  | 5.45135100  | -4.89502400 | 2.60505400  |
| H  | 6.98361300  | -5.02629300 | 1.73837100  |
| H  | 6.80485600  | -3.85233300 | 3.04318700  |
| C  | 2.09950900  | -3.02685700 | -0.94820500 |
| H  | 1.62638400  | -3.22672400 | -1.91625400 |
| H  | 3.13604000  | -3.38052600 | -0.97510600 |
| H  | 1.56095200  | -3.65377700 | -0.22790600 |
| C  | 2.79548900  | 2.60043000  | 1.28551800  |
| C  | 1.34328700  | 2.27286600  | 0.95364600  |
| C  | -2.31004000 | -4.12293100 | 0.19475000  |
| C  | -1.77495900 | -4.42133800 | -1.20549600 |
| H  | 3.19425300  | 3.40852700  | 0.65905500  |
| H  | 2.94492100  | 2.87151800  | 2.33308200  |
| H  | 0.78542400  | 3.10284500  | 0.51106900  |
| H  | 0.78519200  | 1.89919700  | 1.82159600  |
| H  | -2.20188600 | -4.96179500 | 0.88782200  |
| H  | -3.36458500 | -3.81878600 | 0.17725700  |
| H  | -1.06650000 | -5.25986000 | -1.21075800 |
| H  | -2.56501600 | -4.63589800 | -1.93111900 |

**(S)-TSF101**

imaginary frequencies -122.59

E(M06L/LanL2DZ(Pd),6-311G(d,p))=-2799.896721

H(M06L/LanL2DZ(Pd),6-311G(d,p))=-2799.842919

G(M06L/LanL2DZ(Pd),6-311G(d,p))=-2799.991586

E(M06L/def2TZVP)=-2800.35475387

|    |             |             |             |
|----|-------------|-------------|-------------|
| P  | -2.08024800 | 0.04963600  | -0.21330200 |
| Pt | -0.09063000 | -0.97313100 | -0.70781200 |
| C  | -2.53590800 | 1.37841800  | -1.37790200 |
| C  | -3.83210200 | 1.61090800  | -1.85053200 |
| C  | -1.50333300 | 2.20947600  | -1.82159400 |
| C  | -4.08962800 | 2.65035500  | -2.72801100 |
| C  | -1.75047400 | 3.26005300  | -2.69646300 |
| C  | -3.05159700 | 3.48410500  | -3.15366400 |
| C  | -3.54500200 | -1.02104700 | -0.08927100 |
| C  | -3.54294200 | -2.23440000 | -0.79081800 |
| C  | -4.66481100 | -0.69239900 | 0.67388000  |
| C  | -4.63547000 | -3.07909100 | -0.74726500 |
| C  | -5.76918200 | -1.53646500 | 0.73211500  |
| C  | -5.75731000 | -2.73490000 | 0.01435900  |
| O  | -3.40464500 | 4.47271300  | -4.01381900 |
| C  | -1.97585600 | 0.92276700  | 1.38751300  |
| C  | -1.13750300 | 0.39952400  | 2.38518700  |
| C  | -2.65748100 | 2.11199800  | 1.64569400  |
| C  | -1.00278700 | 1.04277500  | 3.60060200  |
| C  | -2.52109500 | 2.77375100  | 2.86316000  |
| C  | -1.68903000 | 2.23687500  | 3.84768800  |
| O  | -6.77531900 | -3.63120000 | 0.00330100  |
| O  | -1.47014400 | 2.80235000  | 5.06233400  |
| C  | -7.92116000 | -3.32463300 | 0.77106800  |
| C  | -2.37871700 | 5.32239100  | -4.48552400 |
| C  | -2.13648700 | 4.01578600  | 5.34362500  |
| B  | 0.59944200  | -2.51301700 | 0.41439400  |
| B  | 2.16720000  | 0.51774600  | 0.27460100  |
| H  | -4.64751400 | 0.96622000  | -1.53408400 |
| H  | -0.48297000 | 2.03080600  | -1.48187300 |
| H  | -5.08913700 | 2.83711800  | -3.10555200 |
| H  | -0.92813700 | 3.88469300  | -3.02370800 |
| H  | -2.65628300 | -2.51362600 | -1.35576100 |
| H  | -4.67610600 | 0.23161200  | 1.24685800  |
| H  | -4.64333800 | -4.02219900 | -1.28248500 |
| H  | -6.62163800 | -1.25904000 | 1.34014300  |
| H  | -0.55838400 | -0.50010900 | 2.18880900  |
| H  | -3.29092200 | 2.55000900  | 0.87780000  |

|    |             |             |             |
|----|-------------|-------------|-------------|
| H  | -0.34891800 | 0.65052100  | 4.37239900  |
| H  | -3.05587600 | 3.70169900  | 3.02712600  |
| H  | -8.39985600 | -2.39874000 | 0.43106900  |
| H  | -7.68058600 | -3.23168700 | 1.83660100  |
| H  | -8.61008400 | -4.15577600 | 0.63108500  |
| H  | -1.61510400 | 4.76503700  | -5.04044700 |
| H  | -1.89684200 | 5.86905700  | -3.66643600 |
| H  | -2.85968500 | 6.03305000  | -5.15540700 |
| H  | -3.22594700 | 3.89573900  | 5.31420600  |
| H  | -1.84717800 | 4.80805200  | 4.64287300  |
| H  | -1.83523900 | 4.30073600  | 6.35013300  |
| O  | 2.28782000  | 0.57906900  | 1.64028600  |
| O  | 1.76161300  | 1.72805400  | -0.27777700 |
| O  | 0.37866200  | -3.84286900 | 0.09336700  |
| O  | 1.00895800  | -2.35608100 | 1.72760800  |
| Si | 4.45680500  | -0.37829600 | -1.22438000 |
| C  | 4.47405800  | 0.14989800  | -3.02393100 |
| H  | 3.83544000  | 1.02640000  | -3.16805700 |
| H  | 5.48357300  | 0.40510400  | -3.35730300 |
| H  | 4.09179800  | -0.64021000 | -3.67465900 |
| C  | 2.69076700  | -0.64178600 | -0.62106100 |
| C  | 1.87016000  | -1.65151300 | -1.00881000 |
| C  | 5.46471900  | -1.88465000 | -0.99345000 |
| C  | 6.10069100  | -2.90568300 | -0.81607500 |
| C  | 5.18691300  | 0.99869200  | -0.16288800 |
| C  | 4.92113500  | 2.34337700  | -0.46117500 |
| C  | 5.92798100  | 0.72379100  | 0.99383800  |
| C  | 5.37529900  | 3.37041800  | 0.35984600  |
| H  | 4.33847600  | 2.59564000  | -1.34401300 |
| C  | 6.38342300  | 1.74550900  | 1.81973100  |
| H  | 6.14862700  | -0.30957800 | 1.25071300  |
| C  | 6.10819300  | 3.07254300  | 1.50422100  |
| H  | 5.16011700  | 4.40433500  | 0.10487500  |
| H  | 6.95614300  | 1.50755600  | 2.71118400  |
| H  | 6.46582300  | 3.87176100  | 2.14674500  |
| C  | 6.85704200  | -4.12052800 | -0.61522700 |
| H  | 6.22677500  | -5.00620200 | -0.73903600 |
| H  | 7.68183400  | -4.20037100 | -1.32921900 |
| H  | 7.28685200  | -4.15995100 | 0.38985800  |
| C  | 2.28699700  | -2.78521100 | -1.90103000 |
| H  | 1.44332600  | -3.17606600 | -2.47380500 |
| H  | 3.07785200  | -2.48658100 | -2.59806800 |
| H  | 2.68096300  | -3.62347400 | -1.31535800 |
| C  | 2.12115600  | 1.94402100  | 2.02419700  |



|   |            |             |            |
|---|------------|-------------|------------|
| C | 1.47470900 | 2.61115900  | 0.81087700 |
| C | 0.91852800 | -3.63114900 | 2.35959000 |
| C | 0.81119700 | -4.62654700 | 1.20434700 |
| H | 3.11049400 | 2.36396800  | 2.24763400 |
| H | 1.50267900 | 2.00047200  | 2.92391500 |
| H | 1.88982700 | 3.59975700  | 0.59162700 |
| H | 0.38488700 | 2.70112000  | 0.91937600 |
| H | 1.79938200 | -3.78918300 | 2.98756800 |
| H | 0.03031400 | -3.64992800 | 3.00423300 |
| H | 1.78025100 | -5.08371600 | 0.96197000 |
| H | 0.09261100 | -5.42968600 | 1.38823900 |

93

**(S)-G1**

imaginary frequencies no

E(M06L/LanL2DZ(Pd),6-311G(d,p))=-2799.930918

H(M06L/LanL2DZ(Pd),6-311G(d,p))=-2799.877998

G(M06L/LanL2DZ(Pd),6-311G(d,p))=-2800.020884

E(M06L/def2TZVP)=-2800.3876417

|    |             |             |             |
|----|-------------|-------------|-------------|
| P  | -1.58193400 | 0.27048900  | -0.34640400 |
| Pt | 0.59380500  | -0.26024700 | -0.10855100 |
| C  | -1.87584400 | 2.02012900  | -0.76941500 |
| C  | -2.76282400 | 2.46683200  | -1.75439400 |
| C  | -1.10789700 | 2.96711500  | -0.08492000 |
| C  | -2.88078400 | 3.81659900  | -2.04294500 |
| C  | -1.22738300 | 4.32368000  | -0.35434600 |
| C  | -2.11541900 | 4.75438500  | -1.34459000 |
| C  | -2.51522400 | -0.72869400 | -1.54803000 |
| C  | -1.81196600 | -1.52180800 | -2.46587400 |
| C  | -3.90975700 | -0.77577600 | -1.55612400 |
| C  | -2.48613300 | -2.32368300 | -3.36794600 |
| C  | -4.60009000 | -1.57370600 | -2.46103700 |
| C  | -3.88442800 | -2.35375500 | -3.37402400 |
| O  | -2.29324300 | 6.05055400  | -1.70526500 |
| C  | -2.48999600 | 0.04810100  | 1.22318900  |
| C  | -2.08527100 | -0.98382000 | 2.08456900  |
| C  | -3.58132100 | 0.83384600  | 1.58950200  |
| C  | -2.78110200 | -1.24172600 | 3.25069900  |
| C  | -4.27876000 | 0.59463900  | 2.77074300  |
| C  | -3.88630600 | -0.45745600 | 3.60049800  |
| O  | -4.45288000 | -3.17484200 | -4.29060500 |
| O  | -4.49911100 | -0.78686100 | 4.76530600  |
| C  | -5.86433600 | -3.23949900 | -4.32477300 |
| C  | -1.50102100 | 7.02093600  | -1.05055700 |

|    |             |             |             |
|----|-------------|-------------|-------------|
| C  | -5.61921800 | -0.01706400 | 5.15137600  |
| B  | 1.15048000  | -2.66324000 | 0.04133600  |
| B  | 1.70692900  | -0.36049900 | 2.12703800  |
| H  | -3.35718800 | 1.75103300  | -2.31530400 |
| H  | -0.38099200 | 2.63298400  | 0.65531700  |
| H  | -3.55697100 | 4.17263600  | -2.81259100 |
| H  | -0.61186000 | 5.02893000  | 0.19148000  |
| H  | -0.72405300 | -1.52472600 | -2.44026800 |
| H  | -4.47502600 | -0.19203400 | -0.83330800 |
| H  | -1.95125100 | -2.94828600 | -4.07547100 |
| H  | -5.68305800 | -1.59153500 | -2.44017400 |
| H  | -1.19486600 | -1.56362700 | 1.84298000  |
| H  | -3.89026600 | 1.65907600  | 0.95178700  |
| H  | -2.48238300 | -2.04248600 | 3.91941600  |
| H  | -5.11764600 | 1.22872000  | 3.03127700  |
| H  | -6.30780600 | -2.26461500 | -4.55875400 |
| H  | -6.27590800 | -3.60116800 | -3.37538800 |
| H  | -6.11472600 | -3.94498900 | -5.11500000 |
| H  | -0.43096700 | 6.84443900  | -1.21338700 |
| H  | -1.69751800 | 7.04468900  | 0.02768200  |
| H  | -1.77611000 | 7.97994300  | -1.48600800 |
| H  | -6.42372200 | -0.07416200 | 4.40880000  |
| H  | -5.35279300 | 1.03492400  | 5.30800200  |
| H  | -5.96852000 | -0.44096800 | 6.09109300  |
| O  | 1.28383800  | -1.29916100 | 3.04474700  |
| O  | 1.46525900  | 0.94325600  | 2.58084400  |
| O  | 0.74758900  | -3.31736500 | -1.12817400 |
| O  | 0.54525500  | -3.21741200 | 1.15922300  |
| Si | 3.83830500  | 0.78964700  | 0.48456800  |
| C  | 4.32567600  | 1.72385500  | 2.03181600  |
| H  | 4.68547800  | 1.02893600  | 2.79751200  |
| H  | 5.14322400  | 2.41315100  | 1.80359900  |
| H  | 3.49112300  | 2.28314900  | 2.45295500  |
| C  | 2.56945400  | -0.58215500 | 0.84333400  |
| C  | 2.33235500  | -1.63500600 | -0.07274700 |
| C  | 3.05591700  | 1.90471200  | -0.73810900 |
| C  | 2.36724900  | 2.50970500  | -1.53900900 |
| C  | 5.43434100  | 0.09510700  | -0.23577400 |
| C  | 5.98392300  | 0.57945900  | -1.42805500 |
| C  | 6.11794100  | -0.93001000 | 0.43171300  |
| C  | 7.16887400  | 0.05930400  | -1.93827900 |
| H  | 5.46578900  | 1.36764800  | -1.97032100 |
| C  | 7.30022300  | -1.45791400 | -0.07538400 |
| H  | 5.71203000  | -1.33623200 | 1.35726200  |

|   |             |             |             |
|---|-------------|-------------|-------------|
| C | 7.82770800  | -0.96339700 | -1.26438000 |
| H | 7.57702300  | 0.44777900  | -2.86675600 |
| H | 7.80940700  | -2.25759100 | 0.45413000  |
| H | 8.74944300  | -1.37506100 | -1.66406500 |
| C | 1.53707000  | 3.19998600  | -2.49893100 |
| H | 1.34340300  | 4.23413200  | -2.19760000 |
| H | 2.00458200  | 3.22209000  | -3.48770000 |
| H | 0.56661700  | 2.70107800  | -2.59709000 |
| C | 3.11948600  | -1.74014200 | -1.35782700 |
| H | 2.54623700  | -2.27634000 | -2.11497800 |
| H | 3.40124000  | -0.76647100 | -1.76639600 |
| H | 4.04736700  | -2.30223600 | -1.19332100 |
| C | 0.75367900  | -0.60715400 | 4.16942400  |
| C | 0.59621700  | 0.83902500  | 3.70172400  |
| C | -0.50571400 | -4.05595400 | 0.69530000  |
| C | -0.17033600 | -4.33960600 | -0.76905200 |
| H | 1.45610900  | -0.70074500 | 5.00795000  |
| H | -0.19504400 | -1.06319900 | 4.46825000  |
| H | 0.88174500  | 1.57577700  | 4.45846200  |
| H | -0.43449600 | 1.05274200  | 3.38213100  |
| H | -0.55359400 | -4.95551600 | 1.31524400  |
| H | -1.46428000 | -3.52475000 | 0.79291900  |
| H | 0.30939600  | -5.31736200 | -0.90734700 |
| H | -1.04777400 | -4.29405700 | -1.42255800 |

46

**(S)-P1**

imaginary frequencies no

E(M06L/LanL2DZ(Pd),6-311G(d,p))=-1301.056742

H(M06L/LanL2DZ(Pd),6-311G(d,p))=-1301.030081

G(M06L/LanL2DZ(Pd),6-311G(d,p))=-1301.11478

E(M06L/def2TZVP)=-1301.15382266

|    |             |             |             |
|----|-------------|-------------|-------------|
| B  | 2.19850000  | -1.32595900 | 0.91790700  |
| B  | 1.52714000  | 1.05465300  | -0.67851000 |
| O  | 1.68906800  | 0.87595500  | -2.03304000 |
| O  | 2.28897100  | 2.08089200  | -0.17606300 |
| O  | 2.62972300  | -2.34459000 | 1.72758700  |
| O  | 3.20541300  | -0.79631400 | 0.14401700  |
| Si | -1.29882800 | 0.96772700  | -0.07662400 |
| C  | -1.21912700 | 2.40064700  | -1.28171700 |
| H  | -0.86637300 | 2.05497500  | -2.25802000 |
| H  | -2.19925700 | 2.86209700  | -1.41981500 |
| H  | -0.52896400 | 3.17408400  | -0.93050700 |
| C  | 0.45027400  | 0.29170700  | 0.13567900  |

|   |             |             |             |
|---|-------------|-------------|-------------|
| C | 0.73839600  | -0.81115300 | 0.87191700  |
| C | -2.42073200 | -0.38764800 | -0.74345700 |
| C | -3.63804000 | -0.70549200 | -0.13075300 |
| C | -2.04007700 | -1.12591300 | -1.87345300 |
| C | -4.45035600 | -1.71933800 | -0.62657900 |
| H | -3.94732700 | -0.15300800 | 0.75361700  |
| C | -2.84856200 | -2.14069300 | -2.37265200 |
| H | -1.09120000 | -0.91021700 | -2.36349300 |
| C | -4.05670500 | -2.43907700 | -1.74913300 |
| H | -5.39093700 | -1.95131000 | -0.13540300 |
| H | -2.53558000 | -2.70285100 | -3.24744500 |
| H | -4.68727600 | -3.23333300 | -2.13729800 |
| C | -0.28751800 | -1.59357500 | 1.64269000  |
| H | 0.12227000  | -1.95370300 | 2.59050800  |
| H | -1.19310000 | -1.02073800 | 1.85667200  |
| H | -0.59110800 | -2.48723100 | 1.08296300  |
| C | 2.59307100  | 1.88249800  | -2.48931500 |
| C | 3.19114300  | 2.47251200  | -1.20938900 |
| C | 4.43073600  | -1.41047900 | 0.53910800  |
| C | 4.00823500  | -2.57988800 | 1.43970900  |
| H | 2.03049700  | 2.62620000  | -3.06802900 |
| H | 3.34072000  | 1.43174300  | -3.14727400 |
| H | 3.27368000  | 3.56223700  | -1.23003300 |
| H | 4.18121400  | 2.05469100  | -0.98723700 |
| H | 4.97942200  | -1.73090500 | -0.35046200 |
| H | 5.04190200  | -0.67140200 | 1.06978200  |
| H | 4.10282800  | -3.54996900 | 0.93945600  |
| H | 4.57071200  | -2.62489500 | 2.37578700  |
| C | -1.99507400 | 1.53463700  | 1.51535800  |
| C | -2.46014200 | 1.88937700  | 2.58107800  |
| C | -3.00938400 | 2.31194600  | 3.84892900  |
| H | -2.34500700 | 3.02005400  | 4.35207400  |
| H | -3.97856200 | 2.80220500  | 3.72048700  |
| H | -3.15537600 | 1.46167100  | 4.52129100  |
